# Supplementary material for: iTRAQ-Based Proteomics Analysis of Plasma of Myasthenia Gravis Patients Treated with Jia Wei Bu Zhong Yi Qi Decoction
Source: Hindawi journal article supplement (doi:10.1155/2019/9147072), 2019-12-13
Supplement: f1 [file 9147072.f1.zip]

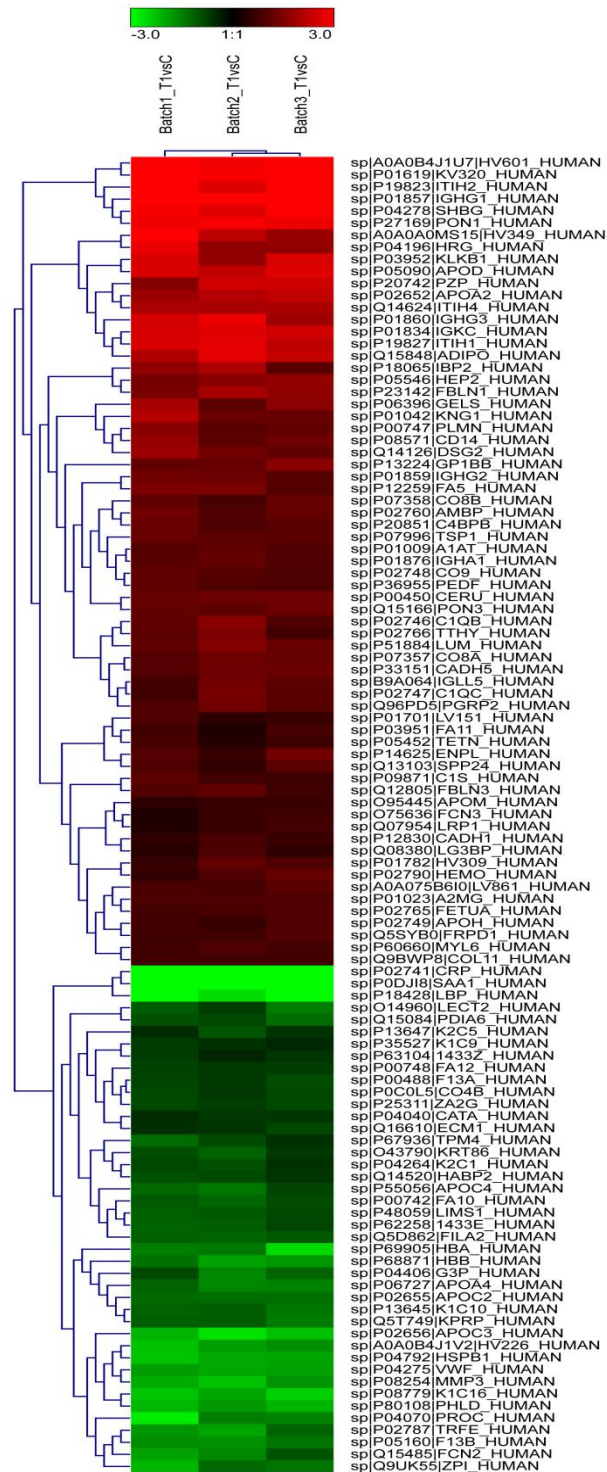

Supplementary Figure 1A: Heat map visualization of the differentially expressed proteins in plasma samples of MG patients (T1) compared with those of the healthy control group (C). Each row represents an individual protein, and each column represents a batch. Green-red heat map values correspond to low-high protein expression. Red represents up-regulation and green represents down-regulation. The gene name (abbreviation) and fold change of the differentially expressed proteins were presented in the T1 vs C excel of Additional file 1 in detail.
