# Supplementary material for: iTRAQ-Based Proteomics Analysis of Plasma of Myasthenia Gravis Patients Treated with Jia Wei Bu Zhong Yi Qi Decoction
Source: Evid Based Complement Alternat Med. 2019 Dec 13;2019:9147072. doi: 10.1155/2019/9147072 (PMC6930785; doi:10.1155/2019/9147072)
Supplement: Supplementary Materials — All upregulated (ratio ≥ 1.5) and downregulated proteins (ratio ≤0.67) in the groups of T1 vs. C, T2 vs. C, T2 vs. T1, T3 vs. C, T3 vs. T1, T3 vs. T2 are presented in Additional file 1; immune pathway-related proteins and the top 10 upregulated or downregulated proteins in each group were picked out and are presented in Excel S1. The 15 core protein in the protein interaction network (Figure 3) and matching statistical analysis of fold changes in T1 vs. C, T2 vs. C, T2 vs. T1, T3 vs. C, T3 vs. T1, and T3 vs. T2 groups are presented in Excel S2. Protein interaction in Excel S1 was analyzed by STRING database and interacted proteins with combined score >0.4 are presented in Excel S3. Heat map visualization of the differentially expressed proteins in plasma samples of myasthenia gravis (MG) patients (T1) compared with those of the healthy control group (C) is shown in Supplementary Figure 1A. Heat map visualization of the differentially expressed proteins in plasma samples of MG patients with the combined treatment of routine western medicine and BZYQ decoction (T3) compared with those of patients with routine treatment (T2) is shown in Supplementary Figure 1B. [file 9147072.f1.zip › 9147072.f1/Additional file 1.xlsx]

## Sheet: 114vs113
N	Accession	Name	Diff_state	114:113	PVal 114:113	GO_function(Biological_Process)	GO_function(Cellular_Component)	GO_function(Molecular_Function)	COG_function	Kegg_function	GO_enrichment(Biological_Process)	GO_enrichment(Cellular_Component)	GO_enrichment(Molecular_Function)	Kegg_enrichment
1	sp|P18428|LBP_HUMAN	Lipopolysaccharide-binding protein OS=Homo sapiens GN=LBP PE=1 SV=3	down	0.102163	0.0123005	immune system process;regulation of biological process;multi-organism process;establishment of localization;cellular component organization or biogenesis;positive regulation of biological process;developmental process;multicellular organismal process;cellular process;response to stimulus;growth;signaling;negative regulation of biological process;localization;locomotion;metabolic process;biologica…	extracellular region part;extracellular region;organelle;cell part;cell	binding		Toll-like receptor signaling pathway	GO:0002673,regulation of acute inflammatory response;GO:0016477,cell migration;GO:0031349,positive regulation of defense response;GO:0032720,negative regulation of tumor necrosis factor production;GO:0031347,regulation of defense response;GO:0060326,cell chemotaxis;GO:0042221,response to chemical stimulus;GO:0045321,leukocyte activation;GO:0048731,system development;GO:0002694,regulation of leuko…	GO:0005615,extracellular space;GO:0005623,cell;GO:0031982,vesicle;GO:0043226,organelle;GO:0009986,cell surface;GO:0005576,extracellular region;GO:0070062,extracellular vesicular exosome;GO:0044464,cell part;GO:0043230,extracellular organelle;GO:0065010,extracellular membrane-bounded organelle;GO:0043227,membrane-bounded organelle;GO:0031988,membrane-bounded vesicle;GO:0016020,membrane;GO:0044421,…	GO:0001530,lipopolysaccharide binding;GO:0005515,protein binding;GO:0005102,receptor binding;GO:0005488,binding
2	sp|P04070|PROC_HUMAN	Vitamin K-dependent protein C OS=Homo sapiens GN=PROC PE=1 SV=1	down	0.278338	0.0430642	immune system process;regulation of biological process;establishment of localization;multicellular organismal process;cellular process;response to stimulus;negative regulation of biological process;localization;locomotion;biological regulation;metabolic process;death	extracellular region part;extracellular region;organelle;cell part;cell;organelle part;membrane-enclosed lumen	binding;catalytic activity	Posttranslational modification, protein turnover, chaperones ;	Complement and coagulation cascades	GO:0065007,biological regulation;GO:0016477,cell migration;GO:0034960,cellular biopolymer metabolic process;GO:0050793,regulation of developmental process;GO:0048870,cell motility;GO:0031347,regulation of defense response;GO:0051239,regulation of multicellular organismal process;GO:0043283,biopolymer metabolic process;GO:0043069,negative regulation of programmed cell death;GO:0060548,negative reg…	GO:0044446,intracellular organelle part;GO:0043229,intracellular organelle;GO:0044444,cytoplasmic part;GO:0005783,endoplasmic reticulum;GO:0044431,Golgi apparatus part;GO:0044422,organelle part;GO:0043233,organelle lumen;GO:0005788,endoplasmic reticulum lumen;GO:0044464,cell part;GO:0005794,Golgi apparatus;GO:0043227,membrane-bounded organelle;GO:0005796,Golgi lumen;GO:0044421,extracellular regio…	GO:0043169,cation binding;GO:0008233,peptidase activity;GO:0046872,metal ion binding;GO:0070011,peptidase activity, acting on L-amino acid peptides;GO:0017171,serine hydrolase activity;GO:0005515,protein binding;GO:0003824,catalytic activity;GO:0005488,binding;GO:0043167,ion binding;GO:0005509,calcium ion binding;GO:0008236,serine-type peptidase activity;GO:0016787,hydrolase activity;GO:0004252,s…
3	sp|P02741|CRP_HUMAN	C-reactive protein OS=Homo sapiens GN=CRP PE=1 SV=1	down	0.0477297	0.00717386	immune system process;regulation of biological process;multi-organism process;establishment of localization;cellular component organization or biogenesis;positive regulation of biological process;developmental process;multicellular organismal process;cellular process;cell proliferation;response to stimulus;negative regulation of biological process;localization;biological regulation;metabolic proc…	extracellular region part;extracellular region;organelle;cell part;cell	binding		Pancreatic secretion;Proximal tubule bicarbonate reclamation;Gastric acid secretion;Collecting duct acid secretion;Nitrogen metabolism	GO:0065007,biological regulation;GO:0050793,regulation of developmental process;GO:0010628,positive regulation of gene expression;GO:0009617,response to bacterium;GO:0009605,response to external stimulus;GO:0048534,hemopoietic or lymphoid organ development;GO:0006950,response to stress;GO:0048731,system development;GO:0048584,positive regulation of response to stimulus;GO:0009607,response to biot…	GO:0044444,cytoplasmic part;GO:0005938,cell cortex;GO:0031982,vesicle;GO:0042995,cell projection;GO:0043005,neuron projection;GO:0070062,extracellular vesicular exosome;GO:0044464,cell part;GO:0043230,extracellular organelle;GO:0043227,membrane-bounded organelle;GO:0044421,extracellular region part;GO:0005615,extracellular space;GO:0044424,intracellular part;GO:0005737,cytoplasm;GO:0005623,cell;G…	GO:0043169,cation binding;GO:0008034,lipoprotein binding;GO:0042803,protein homodimerization activity;GO:0008289,lipid binding;GO:0005515,protein binding;GO:0046914,transition metal ion binding;GO:0050997,quaternary ammonium group binding;GO:0043167,ion binding;GO:0043178,alcohol binding;GO:0001848,complement binding;GO:0070325,lipoprotein receptor binding;GO:0043176,amine binding;GO:0030169,low-…
4	sp|Q14520|HABP2_HUMAN	Hyaluronan-binding protein 2 OS=Homo sapiens GN=HABP2 PE=1 SV=1	down	0.564568	0.0157742	biological adhesion;metabolic process;cellular process	extracellular region part;extracellular region	binding;catalytic activity	Posttranslational modification, protein turnover, chaperones ;		GO:0030163,protein catabolic process;GO:0043170,macromolecule metabolic process;GO:0022610,biological adhesion;GO:0019538,protein metabolic process;GO:0009057,macromolecule catabolic process;GO:0043285,biopolymer catabolic process;GO:0009987,cellular process;GO:0044238,primary metabolic process;GO:0007155,cell adhesion;GO:0006508,proteolysis;GO:0043283,biopolymer metabolic process;GO:0009056,cata…	GO:0005615,extracellular space;GO:0005576,extracellular region;GO:0044421,extracellular region part	GO:0008233,peptidase activity;GO:0070011,peptidase activity, acting on L-amino acid peptides;GO:0017171,serine hydrolase activity;GO:0003824,catalytic activity;GO:0030247,polysaccharide binding;GO:0005488,binding;GO:0008236,serine-type peptidase activity;GO:0030246,carbohydrate binding;GO:0016787,hydrolase activity;GO:0005539,glycosaminoglycan binding;GO:0001871,pattern binding;GO:0004252,serine-…
5	sp|P01876|IGHA1_HUMAN	Ig alpha-1 chain C region OS=Homo sapiens GN=IGHA1 PE=1 SV=2	up	2.0877	0.00424447	immune system process;regulation of biological process;multi-organism process;establishment of localization;cellular component organization or biogenesis;positive regulation of biological process;multicellular organismal process;cellular process;response to stimulus;signaling;localization;biological regulation;metabolic process	extracellular region part;extracellular region;organelle;macromolecular complex;cell part;cell	binding		Fc epsilon RI signaling pathway;Viral myocarditis;Primary immunodeficiency;Staphylococcus aureus infection;Natural killer cell mediated cytotoxicity;Hematopoietic cell lineage;Asthma;Leishmaniasis;Phagosome;Systemic lupus erythematosus;Fc gamma R-mediated phagocytosis;Allograft rejection;B cell receptor signaling pathway;Dilated cardiomyopathy;Autoimmune thyroid disease;Intestinal immune network …	GO:0065007,biological regulation;GO:0034960,cellular biopolymer metabolic process;GO:0009617,response to bacterium;GO:0009605,response to external stimulus;GO:0006950,response to stress;GO:0002694,regulation of leukocyte activation;GO:0048584,positive regulation of response to stimulus;GO:0009607,response to biotic stimulus;GO:0002252,immune effector process;GO:0007154,cell communication;GO:00432…	GO:0031982,vesicle;GO:0070062,extracellular vesicular exosome;GO:0044464,cell part;GO:0043230,extracellular organelle;GO:0043227,membrane-bounded organelle;GO:0044421,extracellular region part;GO:0005623,cell;GO:0044425,membrane part;GO:0009986,cell surface;GO:0043226,organelle;GO:0005886,plasma membrane;GO:0005576,extracellular region;GO:0009897,external side of plasma membrane;GO:0065010,extrac…	GO:0003823,antigen binding;GO:0005515,protein binding;GO:0034987,immunoglobulin receptor binding;GO:0005102,receptor binding;GO:0005488,binding
6	sp|Q15166|PON3_HUMAN	Serum paraoxonase/lactonase 3 OS=Homo sapiens GN=PON3 PE=1 SV=3	up	2.27354	0.0023901	response to stimulus;regulation of biological process;negative regulation of biological process;metabolic process;biological regulation;cellular process	extracellular region part;extracellular region;organelle;cell part;cell	binding;catalytic activity		Metabolic pathways;Microbial metabolism in diverse environments	GO:0065007,biological regulation;GO:0009605,response to external stimulus;GO:0042221,response to chemical stimulus;GO:0044238,primary metabolic process;GO:0046483,heterocycle metabolic process;GO:0031324,negative regulation of cellular metabolic process;GO:0006805,xenobiotic metabolic process;GO:0009892,negative regulation of metabolic process;GO:0046700,heterocycle catabolic process;GO:0080010,r…	GO:0043229,intracellular organelle;GO:0031982,vesicle;GO:0070062,extracellular vesicular exosome;GO:0044464,cell part;GO:0043230,extracellular organelle;GO:0043227,membrane-bounded organelle;GO:0044421,extracellular region part;GO:0005615,extracellular space;GO:0043231,intracellular membrane-bounded organelle;GO:0044424,intracellular part;GO:0005623,cell;GO:0043226,organelle;GO:0005622,intracellu…	GO:0043169,cation binding;GO:0042803,protein homodimerization activity;GO:0005515,protein binding;GO:0003824,catalytic activity;GO:0004064,arylesterase activity;GO:0042578,phosphoric ester hydrolase activity;GO:0016788,hydrolase activity, acting on ester bonds;GO:0043167,ion binding;GO:0016791,phosphatase activity;GO:0004063,aryldialkylphosphatase activity;GO:0046872,metal ion binding;GO:0042802,…
7	sp|P02748|CO9_HUMAN	Complement component C9 OS=Homo sapiens GN=C9 PE=1 SV=2	up	2.04186	0.00312515	immune system process;regulation of biological process;multi-organism process;positive regulation of biological process;multicellular organismal process;cell killing;response to stimulus;biological regulation;metabolic process	extracellular region part;extracellular region;organelle;macromolecular complex;cell part;cell			Complement and coagulation cascades;Systemic lupus erythematosus;Prion diseases;Amoebiasis	GO:0009894,regulation of catabolic process;GO:0002673,regulation of acute inflammatory response;GO:0065007,biological regulation;GO:0009605,response to external stimulus;GO:0031347,regulation of defense response;GO:0006950,response to stress;GO:0048584,positive regulation of response to stimulus;GO:0002252,immune effector process;GO:0030449,regulation of complement activation;GO:0043283,biopolyme…	GO:0031982,vesicle;GO:0070062,extracellular vesicular exosome;GO:0044464,cell part;GO:0043230,extracellular organelle;GO:0016021,integral to membrane;GO:0043227,membrane-bounded organelle;GO:0044421,extracellular region part;GO:0044424,intracellular part;GO:0043234,protein complex;GO:0005737,cytoplasm;GO:0005623,cell;GO:0032991,macromolecular complex;GO:0044425,membrane part;GO:0005579,membrane a…
8	sp|P01009|A1AT_HUMAN	Alpha-1-antitrypsin OS=Homo sapiens GN=SERPINA1 PE=1 SV=3	up	2.06019	0.00250751	response to stimulus;regulation of biological process;establishment of localization;cellular component organization or biogenesis;localization;metabolic process;biological regulation;multicellular organismal process;cellular process	extracellular region part;extracellular region;organelle;cell part;cell;organelle part;membrane-enclosed lumen	enzyme regulator activity;binding	Posttranslational modification, protein turnover, chaperones ;	Complement and coagulation cascades	GO:0006900,membrane budding;GO:0065007,biological regulation;GO:0034960,cellular biopolymer metabolic process;GO:0009605,response to external stimulus;GO:0048194,Golgi vesicle budding;GO:0006950,response to stress;GO:0002576,platelet degranulation;GO:0052548,regulation of endopeptidase activity;GO:0032940,secretion by cell;GO:0043283,biopolymer metabolic process;GO:0016044,membrane organization;G…	GO:0044446,intracellular organelle part;GO:0044431,Golgi apparatus part;GO:0030134,ER to Golgi transport vesicle;GO:0000139,Golgi membrane;GO:0031982,vesicle;GO:0044422,organelle part;GO:0043233,organelle lumen;GO:0070062,extracellular vesicular exosome;GO:0044464,cell part;GO:0005794,Golgi apparatus;GO:0043231,intracellular membrane-bounded organelle;GO:0031974,membrane-enclosed lumen;GO:0005623…	GO:0001948,glycoprotein binding;GO:0042802,identical protein binding;GO:0005515,protein binding;GO:0005488,binding;GO:0004867,serine-type endopeptidase inhibitor activity;GO:0019899,enzyme binding;GO:0002020,protease binding;GO:0004866,endopeptidase inhibitor activity;GO:0030414,peptidase inhibitor activity;GO:0030234,enzyme regulator activity;GO:0004857,enzyme inhibitor activity
9	sp|P02766|TTHY_HUMAN	Transthyretin OS=Homo sapiens GN=TTR PE=1 SV=1	up	2.22915	0.0289994	regulation of biological process;establishment of localization;cellular component organization or biogenesis;cellular process;response to stimulus;signaling;localization;biological regulation;metabolic process	extracellular region part;extracellular region;organelle;macromolecular complex;cell part;cell	binding	General function prediction only ;	Metabolic pathways;Microbial metabolism in diverse environments;Purine metabolism	GO:0050877,neurological system process;GO:0016101,diterpenoid metabolic process;GO:0065007,biological regulation;GO:0009584,detection of visible light;GO:0034960,cellular biopolymer metabolic process;GO:0015837,amine transport;GO:0009605,response to external stimulus;GO:0007600,sensory perception;GO:0044238,primary metabolic process;GO:0009416,response to light stimulus;GO:0009583,detection of li…	GO:0031982,vesicle;GO:0070062,extracellular vesicular exosome;GO:0044464,cell part;GO:0043230,extracellular organelle;GO:0043227,membrane-bounded organelle;GO:0044421,extracellular region part;GO:0005615,extracellular space;GO:0043234,protein complex;GO:0044424,intracellular part;GO:0005737,cytoplasm;GO:0032991,macromolecular complex;GO:0005623,cell;GO:0043226,organelle;GO:0005622,intracellular;G…	GO:0042802,identical protein binding;GO:0005515,protein binding;GO:0046982,protein heterodimerization activity;GO:0005179,hormone activity;GO:0005488,binding;GO:0046983,protein dimerization activity;GO:0042562,hormone binding;GO:0005102,receptor binding
10	sp|P04278|SHBG_HUMAN	Sex hormone-binding globulin OS=Homo sapiens GN=SHBG PE=1 SV=2	up	7.78039	0.0031311		extracellular region part;extracellular region;organelle	binding				GO:0031982,vesicle;GO:0043226,organelle;GO:0005576,extracellular region;GO:0070062,extracellular vesicular exosome;GO:0043230,extracellular organelle;GO:0065010,extracellular membrane-bounded organelle;GO:0031988,membrane-bounded vesicle;GO:0043227,membrane-bounded organelle;GO:0044421,extracellular region part	GO:0042562,hormone binding;GO:0008289,lipid binding;GO:0005496,steroid binding;GO:0005488,binding
11	sp|P01042|KNG1_HUMAN	Kininogen-1 OS=Homo sapiens GN=KNG1 PE=1 SV=2	up	3.03781	0.0385995	regulation of biological process;establishment of localization;positive regulation of biological process;multicellular organismal process;cellular process;response to stimulus;biological adhesion;negative regulation of biological process;localization;biological regulation;metabolic process;death	extracellular region part;extracellular region;organelle;cell part;cell;organelle part;membrane-enclosed lumen	enzyme regulator activity;binding		Complement and coagulation cascades	GO:0065007,biological regulation;GO:0050801,ion homeostasis;GO:0050793,regulation of developmental process;GO:0009605,response to external stimulus;GO:0006950,response to stress;GO:0002576,platelet degranulation;GO:0052548,regulation of endopeptidase activity;GO:0032940,secretion by cell;GO:0019725,cellular homeostasis;GO:0007162,negative regulation of cell adhesion;GO:0051239,regulation of multi…	GO:0044446,intracellular organelle part;GO:0031982,vesicle;GO:0044422,organelle part;GO:0043233,organelle lumen;GO:0070062,extracellular vesicular exosome;GO:0044464,cell part;GO:0043231,intracellular membrane-bounded organelle;GO:0031974,membrane-enclosed lumen;GO:0005623,cell;GO:0030141,secretory granule;GO:0005576,extracellular region;GO:0065010,extracellular membrane-bounded organelle;GO:0031…	GO:0043169,cation binding;GO:0005515,protein binding;GO:0030247,polysaccharide binding;GO:0046914,transition metal ion binding;GO:0043167,ion binding;GO:0030234,enzyme regulator activity;GO:0004857,enzyme inhibitor activity;GO:0001871,pattern binding;GO:0005539,glycosaminoglycan binding;GO:0046872,metal ion binding;GO:0005488,binding;GO:0008270,zinc ion binding;GO:0008201,heparin binding;GO:00304…
12	sp|B9A064|IGLL5_HUMAN	Immunoglobulin lambda-like polypeptide 5 OS=Homo sapiens GN=IGLL5 PE=2 SV=2	up	2.14687	0.0203683	immune system process;regulation of biological process;multi-organism process;establishment of localization;cellular component organization or biogenesis;positive regulation of biological process;multicellular organismal process;cellular process;response to stimulus;signaling;localization;biological regulation;metabolic process	extracellular region part;extracellular region;organelle;macromolecular complex;cell part;cell	binding		Primary immunodeficiency	GO:0065007,biological regulation;GO:0009617,response to bacterium;GO:0009605,response to external stimulus;GO:0006950,response to stress;GO:0002694,regulation of leukocyte activation;GO:0048584,positive regulation of response to stimulus;GO:0009607,response to biotic stimulus;GO:0002252,immune effector process;GO:0007154,cell communication;GO:0043283,biopolymer metabolic process;GO:0016044,membra…	GO:0031982,vesicle;GO:0070062,extracellular vesicular exosome;GO:0044464,cell part;GO:0043230,extracellular organelle;GO:0043227,membrane-bounded organelle;GO:0044421,extracellular region part;GO:0005615,extracellular space;GO:0043234,protein complex;GO:0019814,immunoglobulin complex;GO:0005623,cell;GO:0032991,macromolecular complex;GO:0044425,membrane part;GO:0009986,cell surface;GO:0043226,orga…	GO:0003823,antigen binding;GO:0005515,protein binding;GO:0034987,immunoglobulin receptor binding;GO:0005102,receptor binding;GO:0005488,binding
13	sp|P08254|MMP3_HUMAN	Stromelysin-1 OS=Homo sapiens GN=MMP3 PE=1 SV=2	down	0.246037	0.00646319	regulation of biological process;cellular component organization or biogenesis;positive regulation of biological process;multicellular organismal process;cellular process;response to stimulus;signaling;negative regulation of biological process;localization;locomotion;biological regulation;metabolic process	extracellular region part;extracellular region;organelle;macromolecular complex;cell part;cell	binding;catalytic activity			GO:0065007,biological regulation;GO:0010627,regulation of protein kinase cascade;GO:0044238,primary metabolic process;GO:0031324,negative regulation of cellular metabolic process;GO:0043062,extracellular structure organization;GO:0009892,negative regulation of metabolic process;GO:0043283,biopolymer metabolic process;GO:0009966,regulation of signal transduction;GO:0040012,regulation of locomotion…	GO:0043229,intracellular organelle;GO:0044444,cytoplasmic part;GO:0042995,cell projection;GO:0043005,neuron projection;GO:0044464,cell part;GO:0043227,membrane-bounded organelle;GO:0044421,extracellular region part;GO:0005615,extracellular space;GO:0043231,intracellular membrane-bounded organelle;GO:0044424,intracellular part;GO:0043234,protein complex;GO:0005739,mitochondrion;GO:0005737,cytoplas…	GO:0043169,cation binding;GO:0008233,peptidase activity;GO:0046872,metal ion binding;GO:0070011,peptidase activity, acting on L-amino acid peptides;GO:0032403,protein complex binding;GO:0005515,protein binding;GO:0003824,catalytic activity;GO:0005488,binding;GO:0046914,transition metal ion binding;GO:0043167,ion binding;GO:0008270,zinc ion binding;GO:0005509,calcium ion binding;GO:0016787,hydrola…
14	sp|P67936|TPM4_HUMAN	Tropomyosin alpha-4 chain OS=Homo sapiens GN=TPM4 PE=1 SV=3	down	0.541845	0.0463577	cellular component organization or biogenesis;developmental process;multicellular organismal process;cellular process	extracellular region part;extracellular region;organelle;macromolecular complex;cell part;cell;organelle part	structural molecule activity;binding		Dilated cardiomyopathy;Hypertrophic cardiomyopathy (HCM);Cardiac muscle contraction	GO:0007517,muscle organ development;GO:0042692,muscle cell differentiation;GO:0046907,intracellular transport;GO:0001649,osteoblast differentiation;GO:0048731,system development;GO:0030029,actin filament-based process;GO:0030705,cytoskeleton-dependent intracellular transport;GO:0009888,tissue development;GO:0060537,muscle tissue development;GO:0060348,bone development;GO:0030048,actin filament-ba…	GO:0044446,intracellular organelle part;GO:0005938,cell cortex;GO:0030017,sarcomere;GO:0031982,vesicle;GO:0044422,organelle part;GO:0070062,extracellular vesicular exosome;GO:0044464,cell part;GO:0043232,intracellular non-membrane-bounded organelle;GO:0030055,cell-substrate junction;GO:0005623,cell;GO:0044425,membrane part;GO:0005912,adherens junction;GO:0005576,extracellular region;GO:0043228,no…	GO:0005198,structural molecule activity;GO:0043167,ion binding;GO:0043169,cation binding;GO:0046872,metal ion binding;GO:0005515,protein binding;GO:0008307,structural constituent of muscle;GO:0005488,binding
15	sp|P01860|IGHG3_HUMAN	Ig gamma-3 chain C region OS=Homo sapiens GN=IGHG3 PE=1 SV=2	up	5.39949	0.0130218	immune system process;regulation of biological process;multi-organism process;establishment of localization;cellular component organization or biogenesis;positive regulation of biological process;multicellular organismal process;cellular process;response to stimulus;signaling;localization;biological regulation;metabolic process	extracellular region part;extracellular region;organelle;macromolecular complex;cell part;cell	binding		Fc epsilon RI signaling pathway;Viral myocarditis;Primary immunodeficiency;Staphylococcus aureus infection;Natural killer cell mediated cytotoxicity;Hematopoietic cell lineage;Asthma;Leishmaniasis;Phagosome;Systemic lupus erythematosus;Fc gamma R-mediated phagocytosis;Allograft rejection;B cell receptor signaling pathway;Dilated cardiomyopathy;Autoimmune thyroid disease;Intestinal immune network …	GO:0065007,biological regulation;GO:0009617,response to bacterium;GO:0009605,response to external stimulus;GO:0006950,response to stress;GO:0002694,regulation of leukocyte activation;GO:0048584,positive regulation of response to stimulus;GO:0009607,response to biotic stimulus;GO:0002252,immune effector process;GO:0007154,cell communication;GO:0043283,biopolymer metabolic process;GO:0016044,membra…	GO:0031982,vesicle;GO:0070062,extracellular vesicular exosome;GO:0044464,cell part;GO:0043230,extracellular organelle;GO:0043227,membrane-bounded organelle;GO:0044421,extracellular region part;GO:0005615,extracellular space;GO:0043234,protein complex;GO:0019814,immunoglobulin complex;GO:0005623,cell;GO:0032991,macromolecular complex;GO:0044425,membrane part;GO:0009986,cell surface;GO:0043226,orga…	GO:0003823,antigen binding;GO:0005515,protein binding;GO:0034987,immunoglobulin receptor binding;GO:0005102,receptor binding;GO:0005488,binding
16	sp|P68871|HBB_HUMAN	Hemoglobin subunit beta OS=Homo sapiens GN=HBB PE=1 SV=2	down	0.312405	0.0106509	regulation of biological process;establishment of localization;cellular component organization or biogenesis;positive regulation of biological process;multicellular organismal process;cellular process;response to stimulus;biological adhesion;localization;biological regulation;metabolic process;death	extracellular region part;organelle;cell part;membrane-enclosed lumen;extracellular region;cell;macromolecular complex;organelle part	transporter activity;binding;catalytic activity;antioxidant activity		Malaria	GO:0065007,biological regulation;GO:0050793,regulation of developmental process;GO:0009605,response to external stimulus;GO:0006950,response to stress;GO:0042221,response to chemical stimulus;GO:0070527,platelet aggregation;GO:0031326,regulation of cellular biosynthetic process;GO:0015698,inorganic anion transport;GO:0009891,positive regulation of biosynthetic process;GO:0016044,membrane organiza…	GO:0044444,cytoplasmic part;GO:0031982,vesicle;GO:0044445,cytosolic part;GO:0070062,extracellular vesicular exosome;GO:0044464,cell part;GO:0043230,extracellular organelle;GO:0016021,integral to membrane;GO:0043227,membrane-bounded organelle;GO:0044421,extracellular region part;GO:0044424,intracellular part;GO:0043234,protein complex;GO:0005737,cytoplasm;GO:0005623,cell;GO:0032991,macromolecular …	GO:0043169,cation binding;GO:0046906,tetrapyrrole binding;GO:0005515,protein binding;GO:0005506,iron ion binding;GO:0003824,catalytic activity;GO:0031720,haptoglobin binding;GO:0046914,transition metal ion binding;GO:0016209,antioxidant activity;GO:0043167,ion binding;GO:0016491,oxidoreductase activity;GO:0019825,oxygen binding;GO:0020037,heme binding;GO:0004601,peroxidase activity;GO:0046872,met…
17	sp|P07996|TSP1_HUMAN	Thrombospondin-1 OS=Homo sapiens GN=THBS1 PE=1 SV=2	up	2.18951	0.0012893	positive regulation of biological process;developmental process;multicellular organismal process;cellular process;growth;signaling;negative regulation of biological process;metabolic process;biological regulation;death;immune system process;regulation of biological process;cellular component organization or biogenesis;establishment of localization;cell proliferation;response to stimulus;biologica…	extracellular region part;organelle;cell part;membrane-enclosed lumen;extracellular region;cell;macromolecular complex;organelle part	binding		Phagosome;ECM-receptor interaction;p53 signaling pathway;Focal adhesion;Malaria;Bladder cancer;TGF-beta signaling pathway	GO:0051338,regulation of transferase activity;GO:0000187,activation of MAPK activity;GO:0010740,positive regulation of protein kinase cascade;GO:0034960,cellular biopolymer metabolic process;GO:0042221,response to chemical stimulus;GO:0048731,system development;GO:0002576,platelet degranulation;GO:0002694,regulation of leukocyte activation;GO:0018149,peptide cross-linking;GO:0043537,negative regu…	GO:0044446,intracellular organelle part;GO:0031982,vesicle;GO:0044422,organelle part;GO:0043233,organelle lumen;GO:0070062,extracellular vesicular exosome;GO:0044464,cell part;GO:0016528,sarcoplasm;GO:0043231,intracellular membrane-bounded organelle;GO:0031974,membrane-enclosed lumen;GO:0005623,cell;GO:0030141,secretory granule;GO:0044425,membrane part;GO:0005576,extracellular region;GO:0009897,e…	GO:0043169,cation binding;GO:0008034,lipoprotein binding;GO:0005178,integrin binding;GO:0001968,fibronectin binding;GO:0032403,protein complex binding;GO:0008289,lipid binding;GO:0005515,protein binding;GO:0050840,extracellular matrix binding;GO:0030247,polysaccharide binding;GO:0043167,ion binding;GO:0005543,phospholipid binding;GO:0043236,laminin binding;GO:0019838,growth factor binding;GO:0030…
18	sp|A0A0B4J1U7|HV601_HUMAN	Immunoglobulin heavy variable 6-1 OS=Homo sapiens GN=IGHV6-1 PE=3 SV=1	up	13.9899	0.0124828					Fc epsilon RI signaling pathway;Viral myocarditis;Primary immunodeficiency;Staphylococcus aureus infection;Natural killer cell mediated cytotoxicity;Hematopoietic cell lineage;Asthma;Leishmaniasis;Phagosome;Systemic lupus erythematosus;Fc gamma R-mediated phagocytosis;Allograft rejection;B cell receptor signaling pathway;Dilated cardiomyopathy;Autoimmune thyroid disease;Intestinal immune network …
19	sp|P12259|FA5_HUMAN	Coagulation factor V OS=Homo sapiens GN=F5 PE=1 SV=4	up	2.48918	0.0156084	immune system process;regulation of biological process;establishment of localization;cellular component organization or biogenesis;developmental process;multicellular organismal process;cellular process;response to stimulus;localization;biological regulation;metabolic process	synapse part;extracellular region part;organelle;cell part;membrane-enclosed lumen;synapse;extracellular region;cell;macromolecular complex;organelle part	transporter activity;binding;channel regulator activity;catalytic activity		Complement and coagulation cascades	GO:0006900,membrane budding;GO:0065007,biological regulation;GO:0034960,cellular biopolymer metabolic process;GO:0009605,response to external stimulus;GO:0048534,hemopoietic or lymphoid organ development;GO:0048194,Golgi vesicle budding;GO:0006950,response to stress;GO:0048731,system development;GO:0002576,platelet degranulation;GO:0032940,secretion by cell;GO:0030097,hemopoiesis;GO:0043283,biopo…	GO:0044446,intracellular organelle part;GO:0044456,synapse part;GO:0030134,ER to Golgi transport vesicle;GO:0000139,Golgi membrane;GO:0031982,vesicle;GO:0044464,cell part;GO:0043232,intracellular non-membrane-bounded organelle;GO:0043231,intracellular membrane-bounded organelle;GO:0033267,axon part;GO:0030141,secretory granule;GO:0005798,Golgi-associated vesicle;GO:0012505,endomembrane system;GO:…	GO:0043169,cation binding;GO:0015075,ion transmembrane transporter activity;GO:0017171,serine hydrolase activity;GO:0005507,copper ion binding;GO:0015457,auxiliary transport protein activity;GO:0003824,catalytic activity;GO:0022838,substrate specific channel activity;GO:0046914,transition metal ion binding;GO:0022803,passive transmembrane transporter activity;GO:0043167,ion binding;GO:0016491,oxi…
20	sp|P04275|VWF_HUMAN	von Willebrand factor OS=Homo sapiens GN=VWF PE=1 SV=4	down	0.263957	0.000260042	response to stimulus;biological adhesion;cellular component organization or biogenesis;developmental process;biological regulation;multicellular organismal process;cellular process	extracellular region part;extracellular region;organelle;cell part;cell	binding		Complement and coagulation cascades;ECM-receptor interaction;Focal adhesion	GO:0065007,biological regulation;GO:0051260,protein homooligomerization;GO:0009605,response to external stimulus;GO:0070271,protein complex biogenesis;GO:0006950,response to stress;GO:0001890,placenta development;GO:0048731,system development;GO:0043933,macromolecular complex subunit organization;GO:0051259,protein oligomerization;GO:0009611,response to wounding;GO:0007596,blood coagulation;GO:00…	GO:0043229,intracellular organelle;GO:0044444,cytoplasmic part;GO:0005783,endoplasmic reticulum;GO:0030136,clathrin-coated vesicle;GO:0031982,vesicle;GO:0070062,extracellular vesicular exosome;GO:0044464,cell part;GO:0030135,coated vesicle;GO:0043230,extracellular organelle;GO:0043227,membrane-bounded organelle;GO:0044421,extracellular region part;GO:0043231,intracellular membrane-bounded organel…	GO:0042803,protein homodimerization activity;GO:0005178,integrin binding;GO:0032403,protein complex binding;GO:0001948,glycoprotein binding;GO:0042802,identical protein binding;GO:0005515,protein binding;GO:0005488,binding;GO:0046983,protein dimerization activity;GO:0019899,enzyme binding;GO:0002020,protease binding;GO:0051087,chaperone binding;GO:0005518,collagen binding;GO:0005102,receptor bind…
21	sp|P02787|TRFE_HUMAN	Serotransferrin OS=Homo sapiens GN=TF PE=1 SV=3	down	0.328605	0.0188996	immune system process;regulation of biological process;establishment of localization;cellular component organization or biogenesis;positive regulation of biological process;developmental process;multicellular organismal process;cellular process;cell proliferation;response to stimulus;signaling;localization;locomotion;metabolic process;biological regulation;death	extracellular region part;organelle;cell part;membrane-enclosed lumen;extracellular region;cell;macromolecular complex;organelle part	transporter activity;binding			GO:0051338,regulation of transferase activity;GO:0000187,activation of MAPK activity;GO:0050801,ion homeostasis;GO:0034960,cellular biopolymer metabolic process;GO:0010628,positive regulation of gene expression;GO:0045893,positive regulation of transcription, DNA-dependent;GO:0042221,response to chemical stimulus;GO:0048731,system development;GO:0002576,platelet degranulation;GO:0031326,regulatio…	GO:0044446,intracellular organelle part;GO:0031982,vesicle;GO:0044422,organelle part;GO:0043233,organelle lumen;GO:0070062,extracellular vesicular exosome;GO:0044464,cell part;GO:0005905,coated pit;GO:0044420,extracellular matrix part;GO:0031232,extrinsic to external side of plasma membrane;GO:0005769,early endosome;GO:0043231,intracellular membrane-bounded organelle;GO:0031974,membrane-enclosed …	GO:0032553,ribonucleotide binding;GO:0008324,cation transmembrane transporter activity;GO:0043169,cation binding;GO:0046872,metal ion binding;GO:0032555,purine ribonucleotide binding;GO:0000166,nucleotide binding;GO:0015075,ion transmembrane transporter activity;GO:0046873,metal ion transmembrane transporter activity;GO:0005506,iron ion binding;GO:0005488,binding;GO:0046914,transition metal ion b…
22	sp|P60660|MYL6_HUMAN	Myosin light polypeptide 6 OS=Homo sapiens GN=MYL6 PE=1 SV=2	up	1.78397	0.00491484	regulation of biological process;cellular component organization or biogenesis;developmental process;multicellular organismal process;cellular process;response to stimulus;signaling;locomotion;biological regulation	extracellular region part;extracellular region;organelle;macromolecular complex;cell part;cell;organelle part	structural molecule activity;binding;catalytic activity	Signal transduction mechanisms ; Cytoskeleton ; Cell cycle control, cell division, chromosome partitioning ; General function prediction only ;	Vascular smooth muscle contraction	GO:0065007,biological regulation;GO:0007517,muscle organ development;GO:0031175,neuron projection development;GO:0007167,enzyme linked receptor protein signaling pathway;GO:0046907,intracellular transport;GO:0000902,cell morphogenesis;GO:0048731,system development;GO:0030029,actin filament-based process;GO:0030705,cytoskeleton-dependent intracellular transport;GO:0009888,tissue development;GO:006…	GO:0044446,intracellular organelle part;GO:0043229,intracellular organelle;GO:0044444,cytoplasmic part;GO:0031982,vesicle;GO:0042995,cell projection;GO:0044422,organelle part;GO:0070062,extracellular vesicular exosome;GO:0015629,actin cytoskeleton;GO:0044464,cell part;GO:0043230,extracellular organelle;GO:0043227,membrane-bounded organelle;GO:0043232,intracellular non-membrane-bounded organelle;G…	GO:0043169,cation binding;GO:0046872,metal ion binding;GO:0005515,protein binding;GO:0003824,catalytic activity;GO:0005488,binding;GO:0043167,ion binding;GO:0005198,structural molecule activity;GO:0005509,calcium ion binding;GO:0008307,structural constituent of muscle;GO:0016787,hydrolase activity
23	sp|P63104|1433Z_HUMAN	14-3-3 protein zeta/delta OS=Homo sapiens GN=YWHAZ PE=1 SV=1	down	0.658795	0.0177886	immune system process;regulation of biological process;establishment of localization;cellular component organization or biogenesis;multicellular organismal process;cellular process;response to stimulus;signaling;negative regulation of biological process;localization;biological regulation;metabolic process;death	synapse part;extracellular region part;organelle;cell part;membrane-enclosed lumen;synapse;extracellular region;cell;macromolecular complex;organelle part	binding;catalytic activity	Signal transduction mechanisms ;	Cell cycle;Neurotrophin signaling pathway;Oocyte meiosis;Pathogenic Escherichia coli infection	GO:0065007,biological regulation;GO:0034960,cellular biopolymer metabolic process;GO:0015837,amine transport;GO:0050793,regulation of developmental process;GO:0009605,response to external stimulus;GO:0007267,cell-cell signaling;GO:0006950,response to stress;GO:0042221,response to chemical stimulus;GO:0045321,leukocyte activation;GO:0032940,secretion by cell;GO:0002252,immune effector process;GO:0…	GO:0044446,intracellular organelle part;GO:0044456,synapse part;GO:0031981,nuclear lumen;GO:0031982,vesicle;GO:0005764,lysosome;GO:0044422,organelle part;GO:0043233,organelle lumen;GO:0070062,extracellular vesicular exosome;GO:0044464,cell part;GO:0005654,nucleoplasm;GO:0043232,intracellular non-membrane-bounded organelle;GO:0043231,intracellular membrane-bounded organelle;GO:0005739,mitochondrio…	GO:0019901,protein kinase binding;GO:0032403,protein complex binding;GO:0005515,protein binding;GO:0003824,catalytic activity;GO:0019904,protein domain specific binding;GO:0019899,enzyme binding;GO:0016491,oxidoreductase activity;GO:0019900,kinase binding;GO:0031625,ubiquitin protein ligase binding;GO:0016301,kinase activity;GO:0004497,monooxygenase activity;GO:0042802,identical protein binding;G…
24	sp|P02746|C1QB_HUMAN	Complement C1q subcomponent subunit B OS=Homo sapiens GN=C1QB PE=1 SV=3	up	2.41782	0.0253802	immune system process;regulation of biological process;positive regulation of biological process;developmental process;multicellular organismal process;response to stimulus;biological regulation;metabolic process	extracellular region part;extracellular region;organelle;macromolecular complex	binding		Complement and coagulation cascades;Chagas disease;Systemic lupus erythematosus;Staphylococcus aureus infection;Prion diseases	GO:0065007,biological regulation;GO:0048583,regulation of response to stimulus;GO:0009605,response to external stimulus;GO:0006950,response to stress;GO:0042221,response to chemical stimulus;GO:0048731,system development;GO:0009719,response to endogenous stimulus;GO:0051384,response to glucocorticoid stimulus;GO:0044238,primary metabolic process;GO:0048584,positive regulation of response to stimu…	GO:0005615,extracellular space;GO:0043234,protein complex;GO:0032991,macromolecular complex;GO:0031982,vesicle;GO:0043226,organelle;GO:0005576,extracellular region;GO:0070062,extracellular vesicular exosome;GO:0043230,extracellular organelle;GO:0065010,extracellular membrane-bounded organelle;GO:0043227,membrane-bounded organelle;GO:0031988,membrane-bounded vesicle;GO:0044421,extracellular region…	GO:0042803,protein homodimerization activity;GO:0042802,identical protein binding;GO:0005515,protein binding;GO:0005488,binding;GO:0046983,protein dimerization activity
25	sp|P04792|HSPB1_HUMAN	Heat shock protein beta-1 OS=Homo sapiens GN=HSPB1 PE=1 SV=2	down	0.234757	0.00291147	regulation of biological process;multi-organism process;positive regulation of biological process;developmental process;multicellular organismal process;cellular process;response to stimulus;biological adhesion;signaling;localization;locomotion;biological regulation;metabolic process	extracellular region part;extracellular region;organelle;macromolecular complex;cell part;cell;organelle part	enzyme regulator activity;binding		VEGF signaling pathway;MAPK signaling pathway;Amoebiasis	GO:0065007,biological regulation;GO:0034960,cellular biopolymer metabolic process;GO:0045766,positive regulation of angiogenesis;GO:0050793,regulation of developmental process;GO:0009605,response to external stimulus;GO:0006950,response to stress;GO:0042221,response to chemical stimulus;GO:0070527,platelet aggregation;GO:0009607,response to biotic stimulus;GO:0031326,regulation of cellular biosyn…	GO:0044446,intracellular organelle part;GO:0030017,sarcomere;GO:0031982,vesicle;GO:0044422,organelle part;GO:0070062,extracellular vesicular exosome;GO:0044464,cell part;GO:0043232,intracellular non-membrane-bounded organelle;GO:0043231,intracellular membrane-bounded organelle;GO:0030055,cell-substrate junction;GO:0005634,nucleus;GO:0005623,cell;GO:0044425,membrane part;GO:0005912,adherens juncti…	GO:0019207,kinase regulator activity;GO:0019901,protein kinase binding;GO:0042802,identical protein binding;GO:0005515,protein binding;GO:0019887,protein kinase regulator activity;GO:0004860,protein kinase inhibitor activity;GO:0030291,protein serine/threonine kinase inhibitor activity;GO:0019210,kinase inhibitor activity;GO:0005488,binding;GO:0019899,enzyme binding;GO:0008426,protein kinase C in…
26	sp|Q15485|FCN2_HUMAN	Ficolin-2 OS=Homo sapiens GN=FCN2 PE=1 SV=2	down	0.359247	0.0295618	reproduction;multi-organism process;positive regulation of biological process;multicellular organismal process;cellular process;signaling;viral reproduction;negative regulation of biological process;biological regulation;metabolic process;immune system process;reproductive process;regulation of biological process;cellular component organization or biogenesis;establishment of localization;response…	extracellular region part;extracellular region;organelle;cell part;cell	molecular transducer activity;binding			GO:0065007,biological regulation;GO:0031349,positive regulation of defense response;GO:0009617,response to bacterium;GO:0002218,activation of innate immune response;GO:0009605,response to external stimulus;GO:0031347,regulation of defense response;GO:0006950,response to stress;GO:0048584,positive regulation of response to stimulus;GO:0002221,pattern recognition receptor signaling pathway;GO:00096…	GO:0031982,vesicle;GO:0070062,extracellular vesicular exosome;GO:0005581,collagen;GO:0044464,cell part;GO:0043230,extracellular organelle;GO:0019897,extrinsic to plasma membrane;GO:0044420,extracellular matrix part;GO:0043227,membrane-bounded organelle;GO:0031232,extrinsic to external side of plasma membrane;GO:0044421,extracellular region part;GO:0005623,cell;GO:0005578,proteinaceous extracellul…	GO:0043169,cation binding;GO:0048029,monosaccharide binding;GO:0004872,receptor activity;GO:0005515,protein binding;GO:0043167,ion binding;GO:0060089,molecular transducer activity;GO:0004871,signal transducer activity;GO:0046872,metal ion binding;GO:0043394,proteoglycan binding;GO:0001948,glycoprotein binding;GO:0003823,antigen binding;GO:0001664,G-protein-coupled receptor binding;GO:0005529,suga…
27	sp|P04040|CATA_HUMAN	Catalase OS=Homo sapiens GN=CAT PE=1 SV=3	down	0.647242	0.00477616	regulation of biological process;establishment of localization;cellular component organization or biogenesis;positive regulation of biological process;developmental process;multicellular organismal process;cellular process;response to stimulus;signaling;negative regulation of biological process;localization;biological regulation;metabolic process;death	extracellular region part;extracellular region;organelle;cell part;cell;organelle part;membrane-enclosed lumen	transporter activity;binding;catalytic activity;antioxidant activity	Inorganic ion transport and metabolism ;	Tryptophan metabolism;Metabolic pathways;Amyotrophic lateral sclerosis (ALS);Microbial metabolism in diverse environments;Peroxisome	GO:0010740,positive regulation of protein kinase cascade;GO:0050801,ion homeostasis;GO:0006641,triglyceride metabolic process;GO:0001649,osteoblast differentiation;GO:0042221,response to chemical stimulus;GO:0048731,system development;GO:0009416,response to light stimulus;GO:0045471,response to ethanol;GO:0031326,regulation of cellular biosynthetic process;GO:0046483,heterocycle metabolic process…	GO:0044446,intracellular organelle part;GO:0031967,organelle envelope;GO:0031982,vesicle;GO:0005764,lysosome;GO:0044422,organelle part;GO:0043233,organelle lumen;GO:0070062,extracellular vesicular exosome;GO:0044464,cell part;GO:0005794,Golgi apparatus;GO:0043231,intracellular membrane-bounded organelle;GO:0005739,mitochondrion;GO:0030055,cell-substrate junction;GO:0031974,membrane-enclosed lumen…	GO:0043169,cation binding;GO:0046873,metal ion transmembrane transporter activity;GO:0005515,protein binding;GO:0005506,iron ion binding;GO:0022838,substrate specific channel activity;GO:0046914,transition metal ion binding;GO:0022803,passive transmembrane transporter activity;GO:0016209,antioxidant activity;GO:0050661,NADP or NADPH binding;GO:0016491,oxidoreductase activity;GO:0022857,transmembr…
28	sp|P01782|HV309_HUMAN	Immunoglobulin heavy variable 3-9 OS=Homo sapiens GN=IGHV3-9 PE=1 SV=2	up	1.90142	0.0246711					Fc epsilon RI signaling pathway;Viral myocarditis;Primary immunodeficiency;Staphylococcus aureus infection;Natural killer cell mediated cytotoxicity;Hematopoietic cell lineage;Asthma;Leishmaniasis;Phagosome;Systemic lupus erythematosus;Fc gamma R-mediated phagocytosis;Allograft rejection;B cell receptor signaling pathway;Dilated cardiomyopathy;Autoimmune thyroid disease;Intestinal immune network …
29	sp|Q12805|FBLN3_HUMAN	EGF-containing fibulin-like extracellular matrix protein 1 OS=Homo sapiens GN=EFEMP1 PE=1 SV=2	up	1.96556	0.0144117	regulation of biological process;cellular component organization or biogenesis;positive regulation of biological process;developmental process;multicellular organismal process;cellular process;cell proliferation;response to stimulus;signaling;negative regulation of biological process;biological regulation;metabolic process	extracellular region part;extracellular region;organelle;cell part;cell	molecular transducer activity;binding;catalytic activity		TGF-beta signaling pathway	GO:0065007,biological regulation;GO:0034960,cellular biopolymer metabolic process;GO:0050793,regulation of developmental process;GO:0007167,enzyme linked receptor protein signaling pathway;GO:0048731,system development;GO:0031326,regulation of cellular biosynthetic process;GO:0051239,regulation of multicellular organismal process;GO:0007154,cell communication;GO:0043283,biopolymer metabolic proce…	GO:0031982,vesicle;GO:0070062,extracellular vesicular exosome;GO:0044464,cell part;GO:0043230,extracellular organelle;GO:0044420,extracellular matrix part;GO:0043227,membrane-bounded organelle;GO:0044421,extracellular region part;GO:0005615,extracellular space;GO:0044424,intracellular part;GO:0005737,cytoplasm;GO:0005578,proteinaceous extracellular matrix;GO:0005623,cell;GO:0043226,organelle;GO:0…	GO:0004672,protein kinase activity;GO:0043169,cation binding;GO:0004872,receptor activity;GO:0016773,phosphotransferase activity, alcohol group as acceptor;GO:0005515,protein binding;GO:0003824,catalytic activity;GO:0019199,transmembrane receptor protein kinase activity;GO:0043167,ion binding;GO:0060089,molecular transducer activity;GO:0004871,signal transducer activity;GO:0004888,transmembrane r…
30	sp|Q5T749|KPRP_HUMAN	Keratinocyte proline-rich protein OS=Homo sapiens GN=KPRP PE=1 SV=1	down	0.424952	0.00945132		extracellular region part;extracellular region;organelle					GO:0031982,vesicle;GO:0043226,organelle;GO:0005576,extracellular region;GO:0070062,extracellular vesicular exosome;GO:0043230,extracellular organelle;GO:0065010,extracellular membrane-bounded organelle;GO:0031988,membrane-bounded vesicle;GO:0043227,membrane-bounded organelle;GO:0044421,extracellular region part
31	sp|P35527|K1C9_HUMAN	Keratin, type I cytoskeletal 9 OS=Homo sapiens GN=KRT9 PE=1 SV=3	down	0.657995	0.011365	reproductive process;reproduction;cellular component organization or biogenesis;developmental process;multicellular organismal process;cellular process	extracellular region part;extracellular region;organelle;macromolecular complex;cell part;cell;organelle part	structural molecule activity		Staphylococcus aureus infection;Pathogenic Escherichia coli infection	GO:0006996,organelle organization;GO:0032502,developmental process;GO:0007276,gamete generation;GO:0048731,system development;GO:0045104,intermediate filament cytoskeleton organization;GO:0009888,tissue development;GO:0032501,multicellular organismal process;GO:0045103,intermediate filament-based process;GO:0008544,epidermis development;GO:0048513,organ development;GO:0048232,male gamete generati…	GO:0044446,intracellular organelle part;GO:0043229,intracellular organelle;GO:0044444,cytoplasmic part;GO:0031982,vesicle;GO:0044422,organelle part;GO:0048471,perinuclear region of cytoplasm;GO:0070062,extracellular vesicular exosome;GO:0044464,cell part;GO:0043230,extracellular organelle;GO:0043227,membrane-bounded organelle;GO:0045111,intermediate filament cytoskeleton;GO:0043232,intracellular …	GO:0005198,structural molecule activity;GO:0005200,structural constituent of cytoskeleton
32	sp|P01834|IGKC_HUMAN	Ig kappa chain C region OS=Homo sapiens GN=IGKC PE=1 SV=1	up	5.85313	0.000528882	immune system process;regulation of biological process;multi-organism process;establishment of localization;cellular component organization or biogenesis;positive regulation of biological process;multicellular organismal process;cellular process;response to stimulus;signaling;localization;biological regulation;metabolic process	extracellular region part;extracellular region;organelle;macromolecular complex;cell part;cell	binding		Primary immunodeficiency	GO:0065007,biological regulation;GO:0009617,response to bacterium;GO:0009605,response to external stimulus;GO:0006950,response to stress;GO:0002694,regulation of leukocyte activation;GO:0048584,positive regulation of response to stimulus;GO:0009607,response to biotic stimulus;GO:0002252,immune effector process;GO:0007154,cell communication;GO:0043283,biopolymer metabolic process;GO:0016044,membra…	GO:0031982,vesicle;GO:0070062,extracellular vesicular exosome;GO:0044464,cell part;GO:0043230,extracellular organelle;GO:0043227,membrane-bounded organelle;GO:0044421,extracellular region part;GO:0005615,extracellular space;GO:0043234,protein complex;GO:0019814,immunoglobulin complex;GO:0005623,cell;GO:0032991,macromolecular complex;GO:0044425,membrane part;GO:0009986,cell surface;GO:0043226,orga…	GO:0003823,antigen binding;GO:0005515,protein binding;GO:0034987,immunoglobulin receptor binding;GO:0005102,receptor binding;GO:0005488,binding
33	sp|Q5SYB0|FRPD1_HUMAN	FERM and PDZ domain-containing protein 1 OS=Homo sapiens GN=FRMPD1 PE=1 SV=1	up	1.77567	0.00932002		extracellular region part;extracellular region;organelle;cell part;cell	binding		Axon guidance;Toll-like receptor signaling pathway;Regulation of actin cytoskeleton;Focal adhesion;Pentose phosphate pathway;ErbB signaling pathway;Small cell lung cancer;Metabolic pathways;VEGF signaling pathway;Leukocyte transendothelial migration;Chemokine signaling pathway;Bacterial invasion of epithelial cells;Microbial metabolism in diverse environments;Purine metabolism;Pathways in cancer;…		GO:0043229,intracellular organelle;GO:0044444,cytoplasmic part;GO:0031982,vesicle;GO:0070062,extracellular vesicular exosome;GO:0044464,cell part;GO:0043230,extracellular organelle;GO:0043227,membrane-bounded organelle;GO:0043232,intracellular non-membrane-bounded organelle;GO:0044421,extracellular region part;GO:0044424,intracellular part;GO:0005737,cytoplasm;GO:0005623,cell;GO:0005829,cytosol;G…	GO:0005515,protein binding;GO:0005488,binding
34	sp|P13645|K1C10_HUMAN	Keratin, type I cytoskeletal 10 OS=Homo sapiens GN=KRT10 PE=1 SV=6	down	0.4239	0.0060365	response to stimulus;developmental process;multicellular organismal process;cellular process	extracellular region part;extracellular region;organelle;macromolecular complex;cell part;cell;organelle part	structural molecule activity		Staphylococcus aureus infection;Pathogenic Escherichia coli infection	GO:0009987,cellular process;GO:0048869,cellular developmental process;GO:0032502,developmental process;GO:0030154,cell differentiation	GO:0044446,intracellular organelle part;GO:0043229,intracellular organelle;GO:0031982,vesicle;GO:0044422,organelle part;GO:0070062,extracellular vesicular exosome;GO:0044464,cell part;GO:0043230,extracellular organelle;GO:0043227,membrane-bounded organelle;GO:0045111,intermediate filament cytoskeleton;GO:0043232,intracellular non-membrane-bounded organelle;GO:0044421,extracellular region part;GO:…	GO:0005198,structural molecule activity
35	sp|O14960|LECT2_HUMAN	Leukocyte cell-derived chemotaxin-2 OS=Homo sapiens GN=LECT2 PE=1 SV=2	down	0.474124	0.0344395	regulation of biological process;multi-organism process;cellular component organization or biogenesis;developmental process;multicellular organismal process;cellular process;response to stimulus;signaling;negative regulation of biological process;locomotion;biological regulation	extracellular region part;extracellular region;cell part;cell	binding			GO:0065007,biological regulation;GO:0009617,response to bacterium;GO:0009605,response to external stimulus;GO:0042221,response to chemical stimulus;GO:0000902,cell morphogenesis;GO:0048731,system development;GO:0009607,response to biotic stimulus;GO:0009966,regulation of signal transduction;GO:0009987,cellular process;GO:0030111,regulation of Wnt receptor signaling pathway;GO:0030178,negative reg…	GO:0005615,extracellular space;GO:0005576,extracellular region;GO:0044424,intracellular part;GO:0044464,cell part;GO:0005737,cytoplasm;GO:0005623,cell;GO:0005622,intracellular;GO:0044421,extracellular region part	GO:0042802,identical protein binding;GO:0005515,protein binding;GO:0005488,binding
36	sp|P0C0L5|CO4B_HUMAN	Complement C4-B OS=Homo sapiens GN=C4B PE=1 SV=2	down	0.574767	0.00601952	immune system process;regulation of biological process;multi-organism process;establishment of localization;cellular component organization or biogenesis;positive regulation of biological process;cellular process;response to stimulus;localization;biological regulation;metabolic process	extracellular region part;extracellular region;organelle;cell part;cell	enzyme regulator activity;binding	General function prediction only ;	Complement and coagulation cascades;Systemic lupus erythematosus;Staphylococcus aureus infection	GO:0009894,regulation of catabolic process;GO:0002673,regulation of acute inflammatory response;GO:0065007,biological regulation;GO:0009617,response to bacterium;GO:0009605,response to external stimulus;GO:0009593,detection of chemical stimulus;GO:0031347,regulation of defense response;GO:0002237,response to molecule of bacterial origin;GO:0006950,response to stress;GO:0042221,response to chemica…	GO:0005623,cell;GO:0031982,vesicle;GO:0043226,organelle;GO:0005886,plasma membrane;GO:0005576,extracellular region;GO:0070062,extracellular vesicular exosome;GO:0044464,cell part;GO:0043230,extracellular organelle;GO:0065010,extracellular membrane-bounded organelle;GO:0031988,membrane-bounded vesicle;GO:0043227,membrane-bounded organelle;GO:0016020,membrane;GO:0044421,extracellular region part	GO:0001848,complement binding;GO:0005515,protein binding;GO:0030234,enzyme regulator activity;GO:0030414,peptidase inhibitor activity;GO:0004866,endopeptidase inhibitor activity;GO:0030246,carbohydrate binding;GO:0004857,enzyme inhibitor activity;GO:0005488,binding
37	sp|A0A0B4J1V2|HV226_HUMAN	Immunoglobulin heavy variable 2-26 OS=Homo sapiens GN=IGHV2-26 PE=3 SV=1	down	0.261041	0.00767069					Fc epsilon RI signaling pathway;Viral myocarditis;Primary immunodeficiency;Staphylococcus aureus infection;Natural killer cell mediated cytotoxicity;Hematopoietic cell lineage;Asthma;Leishmaniasis;Phagosome;Systemic lupus erythematosus;Fc gamma R-mediated phagocytosis;Allograft rejection;B cell receptor signaling pathway;Dilated cardiomyopathy;Autoimmune thyroid disease;Intestinal immune network …
38	sp|P02790|HEMO_HUMAN	Hemopexin OS=Homo sapiens GN=HPX PE=1 SV=2	up	1.90217	0.0332017	immune system process;regulation of biological process;establishment of localization;cellular component organization or biogenesis;positive regulation of biological process;cellular process;response to stimulus;signaling;viral reproduction;localization;biological regulation;metabolic process	extracellular region part;extracellular region;organelle;cell part;cell;organelle part;membrane-enclosed lumen	transporter activity;binding;catalytic activity			GO:0065007,biological regulation;GO:0010740,positive regulation of protein kinase cascade;GO:0050801,ion homeostasis;GO:0001934,positive regulation of protein amino acid phosphorylation;GO:0042440,pigment metabolic process;GO:0048584,positive regulation of response to stimulus;GO:0046483,heterocycle metabolic process;GO:0019725,cellular homeostasis;GO:0043283,biopolymer metabolic process;GO:00160…	GO:0031982,vesicle;GO:0043226,organelle;GO:0005576,extracellular region;GO:0070062,extracellular vesicular exosome;GO:0043230,extracellular organelle;GO:0065010,extracellular membrane-bounded organelle;GO:0031988,membrane-bounded vesicle;GO:0043227,membrane-bounded organelle;GO:0044421,extracellular region part	GO:0043169,cation binding;GO:0046872,metal ion binding;GO:0046906,tetrapyrrole binding;GO:0005515,protein binding;GO:0016798,hydrolase activity, acting on glycosyl bonds;GO:0005506,iron ion binding;GO:0003824,catalytic activity;GO:0005488,binding;GO:0046914,transition metal ion binding;GO:0043167,ion binding;GO:0020037,heme binding;GO:0005215,transporter activity;GO:0016787,hydrolase activity
39	sp|P69905|HBA_HUMAN	Hemoglobin subunit alpha OS=Homo sapiens GN=HBA1 PE=1 SV=2	down	0.296835	0.0382768	response to stimulus;regulation of biological process;establishment of localization;cellular component organization or biogenesis;positive regulation of biological process;localization;metabolic process;biological regulation;death;cellular process	extracellular region part;organelle;cell part;membrane-enclosed lumen;extracellular region;cell;macromolecular complex;organelle part	transporter activity;binding;catalytic activity;antioxidant activity		Malaria	GO:0033554,cellular response to stress;GO:0065007,biological regulation;GO:0010941,regulation of cell death;GO:0051094,positive regulation of developmental process;GO:0050793,regulation of developmental process;GO:0070271,protein complex biogenesis;GO:0006950,response to stress;GO:0042221,response to chemical stimulus;GO:0015698,inorganic anion transport;GO:0016044,membrane organization;GO:004393…	GO:0044446,intracellular organelle part;GO:0043229,intracellular organelle;GO:0030529,ribonucleoprotein complex;GO:0044444,cytoplasmic part;GO:0031982,vesicle;GO:0044445,cytosolic part;GO:0044422,organelle part;GO:0070062,extracellular vesicular exosome;GO:0044464,cell part;GO:0043230,extracellular organelle;GO:0043227,membrane-bounded organelle;GO:0043232,intracellular non-membrane-bounded organ…	GO:0043169,cation binding;GO:0046906,tetrapyrrole binding;GO:0005515,protein binding;GO:0005506,iron ion binding;GO:0003824,catalytic activity;GO:0031720,haptoglobin binding;GO:0046914,transition metal ion binding;GO:0016209,antioxidant activity;GO:0043167,ion binding;GO:0016491,oxidoreductase activity;GO:0019825,oxygen binding;GO:0020037,heme binding;GO:0004601,peroxidase activity;GO:0046872,met…
40	sp|P01023|A2MG_HUMAN	Alpha-2-macroglobulin OS=Homo sapiens GN=A2M PE=1 SV=3	up	1.90562	0.000204019	reproduction;positive regulation of biological process;developmental process;multicellular organismal process;cellular process;signaling;negative regulation of biological process;biological regulation;metabolic process;immune system process;reproductive process;regulation of biological process;cellular component organization or biogenesis;establishment of localization;rhythmic process;response to…	extracellular region part;extracellular region;organelle;cell part;cell;organelle part;membrane-enclosed lumen	enzyme regulator activity;binding	General function prediction only ;	Complement and coagulation cascades	GO:0009894,regulation of catabolic process;GO:0002673,regulation of acute inflammatory response;GO:0031347,regulation of defense response;GO:0042221,response to chemical stimulus;GO:0048731,system development;GO:0002576,platelet degranulation;GO:0052548,regulation of endopeptidase activity;GO:0032940,secretion by cell;GO:0009892,negative regulation of metabolic process;GO:0051056,regulation of sm…	GO:0044446,intracellular organelle part;GO:0043229,intracellular organelle;GO:0044444,cytoplasmic part;GO:0031091,platelet alpha granule;GO:0031982,vesicle;GO:0044422,organelle part;GO:0043233,organelle lumen;GO:0070062,extracellular vesicular exosome;GO:0044433,cytoplasmic vesicle part;GO:0044464,cell part;GO:0043230,extracellular organelle;GO:0060205,cytoplasmic membrane-bounded vesicle lumen;G…	GO:0042803,protein homodimerization activity;GO:0005515,protein binding;GO:0019959,interleukin-8 binding;GO:0019958,C-X-C chemokine binding;GO:0004867,serine-type endopeptidase inhibitor activity;GO:0019899,enzyme binding;GO:0030234,enzyme regulator activity;GO:0004857,enzyme inhibitor activity;GO:0019838,growth factor binding;GO:0019966,interleukin-1 binding;GO:0019956,chemokine binding;GO:00428…
41	sp|P04196|HRG_HUMAN	Histidine-rich glycoprotein OS=Homo sapiens GN=HRG PE=1 SV=1	up	4.46162	0.0271404	multi-organism process;positive regulation of biological process;developmental process;multicellular organismal process;cellular process;growth;signaling;negative regulation of biological process;metabolic process;biological regulation;death;immune system process;regulation of biological process;cellular component organization or biogenesis;establishment of localization;cell proliferation;respons…	extracellular region part;organelle;cell part;membrane-enclosed lumen;extracellular region;synapse;cell;organelle part	enzyme regulator activity;chemorepellent activity;protein binding transcription factor activity;binding		Wnt signaling pathway;RNA transport	GO:0009894,regulation of catabolic process;GO:0016477,cell migration;GO:0007267,cell-cell signaling;GO:0010558,negative regulation of macromolecule biosynthetic process;GO:0002576,platelet degranulation;GO:0031326,regulation of cellular biosynthetic process;GO:0052548,regulation of endopeptidase activity;GO:0001952,regulation of cell-matrix adhesion;GO:0009892,negative regulation of metabolic pro…	GO:0044446,intracellular organelle part;GO:0031982,vesicle;GO:0044422,organelle part;GO:0043233,organelle lumen;GO:0070062,extracellular vesicular exosome;GO:0044464,cell part;GO:0044463,cell projection part;GO:0043231,intracellular membrane-bounded organelle;GO:0033267,axon part;GO:0031974,membrane-enclosed lumen;GO:0005634,nucleus;GO:0005623,cell;GO:0030141,secretory granule;GO:0044425,membrane…	GO:0043169,cation binding;GO:0046906,tetrapyrrole binding;GO:0032403,protein complex binding;GO:0005515,protein binding;GO:0005506,iron ion binding;GO:0030247,polysaccharide binding;GO:0046914,transition metal ion binding;GO:0043167,ion binding;GO:0004867,serine-type endopeptidase inhibitor activity;GO:0020037,heme binding;GO:0008047,enzyme activator activity;GO:0030234,enzyme regulator activity;…
42	sp|P20742|PZP_HUMAN	Pregnancy zone protein OS=Homo sapiens GN=PZP PE=1 SV=4	up	4.60196	0.0177818	immune system process;regulation of biological process;establishment of localization;cellular component organization or biogenesis;positive regulation of biological process;developmental process;multicellular organismal process;cellular process;response to stimulus;signaling;negative regulation of biological process;localization;biological regulation;metabolic process	extracellular region part;extracellular region;organelle;cell part;cell;organelle part;membrane-enclosed lumen	enzyme regulator activity;binding	General function prediction only ;	Complement and coagulation cascades	GO:0009894,regulation of catabolic process;GO:0002673,regulation of acute inflammatory response;GO:0065007,biological regulation;GO:0002698,negative regulation of immune effector process;GO:0009605,response to external stimulus;GO:0031347,regulation of defense response;GO:0006950,response to stress;GO:0002576,platelet degranulation;GO:0052548,regulation of endopeptidase activity;GO:0032940,secret…	GO:0044446,intracellular organelle part;GO:0043229,intracellular organelle;GO:0044444,cytoplasmic part;GO:0031091,platelet alpha granule;GO:0031982,vesicle;GO:0044422,organelle part;GO:0043233,organelle lumen;GO:0070062,extracellular vesicular exosome;GO:0044433,cytoplasmic vesicle part;GO:0044464,cell part;GO:0043230,extracellular organelle;GO:0060205,cytoplasmic membrane-bounded vesicle lumen;G…	GO:0005515,protein binding;GO:0019959,interleukin-8 binding;GO:0019958,C-X-C chemokine binding;GO:0004867,serine-type endopeptidase inhibitor activity;GO:0019899,enzyme binding;GO:0030234,enzyme regulator activity;GO:0004857,enzyme inhibitor activity;GO:0019838,growth factor binding;GO:0019966,interleukin-1 binding;GO:0019956,chemokine binding;GO:0005488,binding;GO:0019955,cytokine binding;GO:000…
43	sp|Q07954|LRP1_HUMAN	Prolow-density lipoprotein receptor-related protein 1 OS=Homo sapiens GN=LRP1 PE=1 SV=2	up	1.5427	0.0356286	regulation of biological process;establishment of localization;cellular component organization or biogenesis;positive regulation of biological process;developmental process;multicellular organismal process;cellular process;cell proliferation;response to stimulus;signaling;negative regulation of biological process;localization;locomotion;metabolic process;biological regulation;death	organelle;macromolecular complex;cell part;cell;organelle part;membrane-enclosed lumen	molecular transducer activity;transporter activity;binding		Alzheimer's disease;Malaria	GO:0051338,regulation of transferase activity;GO:0048731,system development;GO:0032370,positive regulation of lipid transport;GO:0009416,response to light stimulus;GO:0051239,regulation of multicellular organismal process;GO:0016044,membrane organization;GO:0022008,neurogenesis;GO:0021537,telencephalon development;GO:0040012,regulation of locomotion;GO:0019220,regulation of phosphate metabolic pr…	GO:0044446,intracellular organelle part;GO:0005765,lysosomal membrane;GO:0030136,clathrin-coated vesicle;GO:0031981,nuclear lumen;GO:0031982,vesicle;GO:0005764,lysosome;GO:0044422,organelle part;GO:0043233,organelle lumen;GO:0044464,cell part;GO:0005905,coated pit;GO:0043232,intracellular non-membrane-bounded organelle;GO:0043231,intracellular membrane-bounded organelle;GO:0030055,cell-substrate …	GO:0043169,cation binding;GO:0004872,receptor activity;GO:0032403,protein complex binding;GO:0005515,protein binding;GO:0043167,ion binding;GO:0060089,molecular transducer activity;GO:0004871,signal transducer activity;GO:0019899,enzyme binding;GO:0070325,lipoprotein receptor binding;GO:0046872,metal ion binding;GO:0034185,apolipoprotein binding;GO:0005488,binding;GO:0008565,protein transporter a…
44	sp|Q5D862|FILA2_HUMAN	Filaggrin-2 OS=Homo sapiens GN=FLG2 PE=1 SV=1	down	0.451768	0.000908107	immune system process;developmental process;multicellular organismal process;cellular process	extracellular region part;extracellular region;organelle;cell part;cell	binding			GO:0048534,hemopoietic or lymphoid organ development;GO:0032502,developmental process;GO:0002376,immune system process;GO:0048731,system development;GO:0009987,cellular process;GO:0048869,cellular developmental process;GO:0032501,multicellular organismal process;GO:0030097,hemopoiesis;GO:0048856,anatomical structure development;GO:0030154,cell differentiation;GO:0048513,organ development;GO:00072…	GO:0043229,intracellular organelle;GO:0031982,vesicle;GO:0070062,extracellular vesicular exosome;GO:0044464,cell part;GO:0043230,extracellular organelle;GO:0043227,membrane-bounded organelle;GO:0043232,intracellular non-membrane-bounded organelle;GO:0044421,extracellular region part;GO:0043231,intracellular membrane-bounded organelle;GO:0044424,intracellular part;GO:0005737,cytoplasm;GO:0005634,n…	GO:0043167,ion binding;GO:0043169,cation binding;GO:0046872,metal ion binding;GO:0005488,binding
45	sp|P13647|K2C5_HUMAN	Keratin, type II cytoskeletal 5 OS=Homo sapiens GN=KRT5 PE=1 SV=3	down	0.612836	0.0417566	cell proliferation;regulation of biological process;cellular component organization or biogenesis;negative regulation of biological process;developmental process;biological regulation;multicellular organismal process;cellular process	extracellular region part;extracellular region;organelle;macromolecular complex;cell part;cell;organelle part	structural molecule activity	Cytoskeleton ;		GO:0065007,biological regulation;GO:0048731,system development;GO:0050680,negative regulation of epithelial cell proliferation;GO:0009888,tissue development;GO:0050678,regulation of epithelial cell proliferation;GO:0008285,negative regulation of cell proliferation;GO:0007398,ectoderm development;GO:0009987,cellular process;GO:0031581,hemidesmosome assembly;GO:0044085,cellular component biogenesis…	GO:0044446,intracellular organelle part;GO:0043229,intracellular organelle;GO:0044444,cytoplasmic part;GO:0031982,vesicle;GO:0044422,organelle part;GO:0070062,extracellular vesicular exosome;GO:0044464,cell part;GO:0043230,extracellular organelle;GO:0043227,membrane-bounded organelle;GO:0045111,intermediate filament cytoskeleton;GO:0043232,intracellular non-membrane-bounded organelle;GO:0044421,e…	GO:0005198,structural molecule activity;GO:0005200,structural constituent of cytoskeleton
46	sp|P00488|F13A_HUMAN	Coagulation factor XIII A chain OS=Homo sapiens GN=F13A1 PE=1 SV=4	down	0.571347	0.00647604	response to stimulus;establishment of localization;localization;metabolic process;biological regulation;multicellular organismal process;cellular process	extracellular region part;extracellular region;organelle;cell part;cell;organelle part;membrane-enclosed lumen	binding;catalytic activity		Complement and coagulation cascades	GO:0065007,biological regulation;GO:0034960,cellular biopolymer metabolic process;GO:0009605,response to external stimulus;GO:0006950,response to stress;GO:0002576,platelet degranulation;GO:0018149,peptide cross-linking;GO:0044238,primary metabolic process;GO:0032940,secretion by cell;GO:0043283,biopolymer metabolic process;GO:0043170,macromolecule metabolic process;GO:0046903,secretion;GO:000961…	GO:0044446,intracellular organelle part;GO:0043229,intracellular organelle;GO:0044444,cytoplasmic part;GO:0031091,platelet alpha granule;GO:0031982,vesicle;GO:0044422,organelle part;GO:0043233,organelle lumen;GO:0044433,cytoplasmic vesicle part;GO:0044464,cell part;GO:0060205,cytoplasmic membrane-bounded vesicle lumen;GO:0043227,membrane-bounded organelle;GO:0043231,intracellular membrane-bounded…	GO:0043167,ion binding;GO:0043169,cation binding;GO:0046872,metal ion binding;GO:0016740,transferase activity;GO:0003824,catalytic activity;GO:0016746,transferase activity, transferring acyl groups;GO:0005488,binding
47	sp|P13224|GP1BB_HUMAN	Platelet glycoprotein Ib beta chain OS=Homo sapiens GN=GP1BB PE=1 SV=1	up	2.54835	0.0126476	response to stimulus;biological adhesion;regulation of biological process;metabolic process;biological regulation;multicellular organismal process;cellular process	cell part;cell	binding		ECM-receptor interaction;Hematopoietic cell lineage	GO:0065007,biological regulation;GO:0009605,response to external stimulus;GO:0006950,response to stress;GO:0032501,multicellular organismal process;GO:0050817,coagulation;GO:0050878,regulation of body fluid levels;GO:0022610,biological adhesion;GO:0042060,wound healing;GO:0009611,response to wounding;GO:0007596,blood coagulation;GO:0050789,regulation of biological process;GO:0030168,platelet acti…	GO:0044424,intracellular part;GO:0044444,cytoplasmic part;GO:0005737,cytoplasm;GO:0005623,cell;GO:0044425,membrane part;GO:0005622,intracellular;GO:0005886,plasma membrane;GO:0005887,integral to plasma membrane;GO:0044464,cell part;GO:0031224,intrinsic to membrane;GO:0016021,integral to membrane;GO:0016020,membrane;GO:0044459,plasma membrane part;GO:0031226,intrinsic to plasma membrane	GO:0042802,identical protein binding;GO:0005515,protein binding;GO:0005488,binding
48	sp|P14625|ENPL_HUMAN	Endoplasmin OS=Homo sapiens GN=HSP90B1 PE=1 SV=1	up	2.05607	0.0340133	immune system process;regulation of biological process;establishment of localization;cellular component organization or biogenesis;positive regulation of biological process;cellular process;response to stimulus;signaling;negative regulation of biological process;localization;biological regulation;metabolic process;death	extracellular region part;organelle;cell part;membrane-enclosed lumen;extracellular region;cell;macromolecular complex;organelle part	binding	Posttranslational modification, protein turnover, chaperones ;	NOD-like receptor signaling pathway;Prostate cancer;Pathways in cancer;Protein processing in endoplasmic reticulum	GO:0065007,biological regulation;GO:0050801,ion homeostasis;GO:0034960,cellular biopolymer metabolic process;GO:0031349,positive regulation of defense response;GO:0050793,regulation of developmental process;GO:0002218,activation of innate immune response;GO:0019941,modification-dependent protein catabolic process;GO:0031347,regulation of defense response;GO:0006950,response to stress;GO:0035303,r…	GO:0044446,intracellular organelle part;GO:0031982,vesicle;GO:0044422,organelle part;GO:0043233,organelle lumen;GO:0070062,extracellular vesicular exosome;GO:0005789,endoplasmic reticulum membrane;GO:0044464,cell part;GO:0016528,sarcoplasm;GO:0043231,intracellular membrane-bounded organelle;GO:0030055,cell-substrate junction;GO:0031974,membrane-enclosed lumen;GO:0005634,nucleus;GO:0005623,cell;GO…	GO:0032553,ribonucleotide binding;GO:0043169,cation binding;GO:0019902,phosphatase binding;GO:0005515,protein binding;GO:0043167,ion binding;GO:0019899,enzyme binding;GO:0070325,lipoprotein receptor binding;GO:0046872,metal ion binding;GO:0032555,purine ribonucleotide binding;GO:0000166,nucleotide binding;GO:0005488,binding;GO:0050750,low-density lipoprotein receptor binding;GO:0017076,purine nuc…
49	sp|Q9BWP8|COL11_HUMAN	Collectin-11 OS=Homo sapiens GN=COLEC11 PE=1 SV=1	up	1.72187	3.29e-14	establishment of localization;cellular component organization or biogenesis;developmental process;localization;multicellular organismal process;cellular process	extracellular region part;extracellular region	binding		Phagosome	GO:0051234,establishment of localization;GO:0032502,developmental process;GO:0016192,vesicle-mediated transport;GO:0010324,membrane invagination;GO:0006898,receptor-mediated endocytosis;GO:0051179,localization;GO:0009987,cellular process;GO:0032501,multicellular organismal process;GO:0006810,transport;GO:0006897,endocytosis;GO:0016044,membrane organization;GO:0016043,cellular component organizati…	GO:0005576,extracellular region;GO:0005581,collagen;GO:0005578,proteinaceous extracellular matrix;GO:0044420,extracellular matrix part;GO:0031012,extracellular matrix;GO:0044421,extracellular region part	GO:0048029,monosaccharide binding;GO:0005529,sugar binding;GO:0030246,carbohydrate binding;GO:0005488,binding
50	sp|P05090|APOD_HUMAN	Apolipoprotein D OS=Homo sapiens GN=APOD PE=1 SV=1	up	5.70016	0.00198951	developmental process;multicellular organismal process;cellular process;growth;signaling;negative regulation of biological process;metabolic process;biological regulation;immune system process;regulation of biological process;cellular component organization or biogenesis;establishment of localization;cell proliferation;biological adhesion;response to stimulus;localization;locomotion	extracellular region part;extracellular region;organelle;macromolecular complex;cell part;cell	transporter activity;binding	Cell wall/membrane/envelope biogenesis ;		GO:0065007,biological regulation;GO:0009605,response to external stimulus;GO:0031175,neuron projection development;GO:0050748,negative regulation of lipoprotein metabolic process;GO:0019318,hexose metabolic process;GO:0006950,response to stress;GO:0060341,regulation of cellular localization;GO:0042221,response to chemical stimulus;GO:0000902,cell morphogenesis;GO:0048731,system development;GO:004…	GO:0030529,ribonucleoprotein complex;GO:0031982,vesicle;GO:0070062,extracellular vesicular exosome;GO:0044464,cell part;GO:0043232,intracellular non-membrane-bounded organelle;GO:0043231,intracellular membrane-bounded organelle;GO:0005623,cell;GO:0005576,extracellular region;GO:0005840,ribosome;GO:0043228,non-membrane-bounded organelle;GO:0065010,extracellular membrane-bounded organelle;GO:003198…	GO:0032934,sterol binding;GO:0008289,lipid binding;GO:0015485,cholesterol binding;GO:0005515,protein binding;GO:0005488,binding;GO:0005319,lipid transporter activity;GO:0005496,steroid binding;GO:0022892,substrate-specific transporter activity;GO:0005215,transporter activity
51	sp|P08779|K1C16_HUMAN	Keratin, type I cytoskeletal 16 OS=Homo sapiens GN=KRT16 PE=1 SV=4	down	0.212631	0.00455286	immune system process;regulation of biological process;cellular component organization or biogenesis;developmental process;multicellular organismal process;cellular process;cell proliferation;response to stimulus;negative regulation of biological process;localization;locomotion;biological regulation	extracellular region part;extracellular region;organelle;macromolecular complex;cell part;cell;organelle part	structural molecule activity		Staphylococcus aureus infection;Pathogenic Escherichia coli infection	GO:0065007,biological regulation;GO:0016477,cell migration;GO:0042303,molting cycle;GO:0048870,cell motility;GO:0009605,response to external stimulus;GO:0006950,response to stress;GO:0031424,keratinization;GO:0042221,response to chemical stimulus;GO:0048731,system development;GO:0009888,tissue development;GO:0007398,ectoderm development;GO:0040012,regulation of locomotion;GO:0006955,immune respon…	GO:0044446,intracellular organelle part;GO:0043229,intracellular organelle;GO:0044444,cytoplasmic part;GO:0031982,vesicle;GO:0044422,organelle part;GO:0070062,extracellular vesicular exosome;GO:0044464,cell part;GO:0043230,extracellular organelle;GO:0043227,membrane-bounded organelle;GO:0045111,intermediate filament cytoskeleton;GO:0043232,intracellular non-membrane-bounded organelle;GO:0044421,e…	GO:0005198,structural molecule activity;GO:0005200,structural constituent of cytoskeleton
52	sp|P55056|APOC4_HUMAN	Apolipoprotein C-IV OS=Homo sapiens GN=APOC4 PE=1 SV=1	down	0.451402	0.0218599	regulation of biological process;establishment of localization;positive regulation of biological process;localization;metabolic process;biological regulation	extracellular region part;extracellular region;macromolecular complex	transporter activity			GO:0065007,biological regulation;GO:0010883,regulation of lipid storage;GO:0048878,chemical homeostasis;GO:0032879,regulation of localization;GO:0044238,primary metabolic process;GO:0055088,lipid homeostasis;GO:0006869,lipid transport;GO:0042592,homeostatic process;GO:0008152,metabolic process;GO:0051234,establishment of localization;GO:0050789,regulation of biological process;GO:0006629,lipid me…	GO:0005615,extracellular space;GO:0032994,protein-lipid complex;GO:0032991,macromolecular complex;GO:0034361,very-low-density lipoprotein particle;GO:0034364,high-density lipoprotein particle;GO:0034358,plasma lipoprotein particle;GO:0005576,extracellular region;GO:0034385,triglyceride-rich lipoprotein particle;GO:0044421,extracellular region part	GO:0005319,lipid transporter activity;GO:0005215,transporter activity;GO:0022892,substrate-specific transporter activity
53	sp|P19827|ITIH1_HUMAN	Inter-alpha-trypsin inhibitor heavy chain H1 OS=Homo sapiens GN=ITIH1 PE=1 SV=3	up	5.64276	0.0027624	regulation of biological process;metabolic process;biological regulation	extracellular region part;extracellular region;organelle	enzyme regulator activity;binding	General function prediction only ;	Arrhythmogenic right ventricular cardiomyopathy (ARVC);MAPK signaling pathway;Dilated cardiomyopathy;Hypertrophic cardiomyopathy (HCM);Cardiac muscle contraction	GO:0065007,biological regulation;GO:0050790,regulation of catalytic activity;GO:0044238,primary metabolic process;GO:0010466,negative regulation of peptidase activity;GO:0052548,regulation of endopeptidase activity;GO:0030203,glycosaminoglycan metabolic process;GO:0043283,biopolymer metabolic process;GO:0006807,nitrogen compound metabolic process;GO:0008152,metabolic process;GO:0065009,regulation…	GO:0031982,vesicle;GO:0043226,organelle;GO:0005576,extracellular region;GO:0070062,extracellular vesicular exosome;GO:0043230,extracellular organelle;GO:0065010,extracellular membrane-bounded organelle;GO:0031988,membrane-bounded vesicle;GO:0043227,membrane-bounded organelle;GO:0044421,extracellular region part	GO:0043169,cation binding;GO:0046872,metal ion binding;GO:0005488,binding;GO:0043167,ion binding;GO:0004867,serine-type endopeptidase inhibitor activity;GO:0005509,calcium ion binding;GO:0004866,endopeptidase inhibitor activity;GO:0030414,peptidase inhibitor activity;GO:0030234,enzyme regulator activity;GO:0004857,enzyme inhibitor activity
54	sp|P02765|FETUA_HUMAN	Alpha-2-HS-glycoprotein OS=Homo sapiens GN=AHSG PE=1 SV=1	up	1.82155	0.00282824	regulation of biological process;establishment of localization;cellular component organization or biogenesis;positive regulation of biological process;developmental process;multicellular organismal process;cellular process;response to stimulus;signaling;negative regulation of biological process;localization;biological regulation;metabolic process	extracellular region part;extracellular region;organelle;cell part;cell	enzyme regulator activity;binding			GO:0065007,biological regulation;GO:0050793,regulation of developmental process;GO:0009605,response to external stimulus;GO:0031347,regulation of defense response;GO:0006950,response to stress;GO:0048731,system development;GO:0070168,negative regulation of biomineral formation;GO:0052548,regulation of endopeptidase activity;GO:0031324,negative regulation of cellular metabolic process;GO:0051239,r…	GO:0005623,cell;GO:0031982,vesicle;GO:0043226,organelle;GO:0031012,extracellular matrix;GO:0005886,plasma membrane;GO:0005576,extracellular region;GO:0070062,extracellular vesicular exosome;GO:0044464,cell part;GO:0043230,extracellular organelle;GO:0065010,extracellular membrane-bounded organelle;GO:0031988,membrane-bounded vesicle;GO:0043227,membrane-bounded organelle;GO:0016020,membrane;GO:0044…	GO:0019207,kinase regulator activity;GO:0005515,protein binding;GO:0004869,cysteine-type endopeptidase inhibitor activity;GO:0019210,kinase inhibitor activity;GO:0030234,enzyme regulator activity;GO:0030414,peptidase inhibitor activity;GO:0004866,endopeptidase inhibitor activity;GO:0004857,enzyme inhibitor activity;GO:0005488,binding
55	sp|P02749|APOH_HUMAN	Beta-2-glycoprotein 1 OS=Homo sapiens GN=APOH PE=1 SV=3	up	1.73844	0.0111705	regulation of biological process;establishment of localization;positive regulation of biological process;developmental process;multicellular organismal process;cellular process;cell proliferation;response to stimulus;negative regulation of biological process;localization;locomotion;metabolic process;biological regulation;death	extracellular region part;extracellular region;organelle;macromolecular complex;cell part;cell	enzyme regulator activity;binding		Cell adhesion molecules (CAMs);Complement and coagulation cascades;Malaria	GO:0009894,regulation of catabolic process;GO:0065007,biological regulation;GO:0050793,regulation of developmental process;GO:0009605,response to external stimulus;GO:0006950,response to stress;GO:0042221,response to chemical stimulus;GO:0034014,response to triglyceride;GO:0048731,system development;GO:0051239,regulation of multicellular organismal process;GO:0009892,negative regulation of metabo…	GO:0032994,protein-lipid complex;GO:0034361,very-low-density lipoprotein particle;GO:0031982,vesicle;GO:0070062,extracellular vesicular exosome;GO:0044464,cell part;GO:0043230,extracellular organelle;GO:0043227,membrane-bounded organelle;GO:0034385,triglyceride-rich lipoprotein particle;GO:0044421,extracellular region part;GO:0005615,extracellular space;GO:0044424,intracellular part;GO:0005737,cy…	GO:0008289,lipid binding;GO:0001948,glycoprotein binding;GO:0042802,identical protein binding;GO:0005515,protein binding;GO:0030247,polysaccharide binding;GO:0005488,binding;GO:0060229,lipase activator activity;GO:0060230,lipoprotein lipase activator activity;GO:0005543,phospholipid binding;GO:0008201,heparin binding;GO:0008047,enzyme activator activity;GO:0030234,enzyme regulator activity;GO:003…
56	sp|P23142|FBLN1_HUMAN	Fibulin-1 OS=Homo sapiens GN=FBLN1 PE=1 SV=4	up	3.2998	0.00840029	reproductive process;reproduction;regulation of biological process;multi-organism process;cellular component organization or biogenesis;positive regulation of biological process;developmental process;multicellular organismal process;cellular process;cell proliferation;response to stimulus;signaling;negative regulation of biological process;localization;locomotion;biological regulation;metabolic p…	extracellular region part;extracellular region;organelle;macromolecular complex	enzyme regulator activity;structural molecule activity;binding		TGF-beta signaling pathway	GO:0065007,biological regulation;GO:0060255,regulation of macromolecule metabolic process;GO:0010627,regulation of protein kinase cascade;GO:0010628,positive regulation of gene expression;GO:0043062,extracellular structure organization;GO:0007154,cell communication;GO:0009966,regulation of signal transduction;GO:0065009,regulation of molecular function;GO:0007565,female pregnancy;GO:0048522,posit…	GO:0005577,fibrinogen complex;GO:0031982,vesicle;GO:0070062,extracellular vesicular exosome;GO:0043230,extracellular organelle;GO:0044420,extracellular matrix part;GO:0043227,membrane-bounded organelle;GO:0044421,extracellular region part;GO:0005615,extracellular space;GO:0043234,protein complex;GO:0005578,proteinaceous extracellular matrix;GO:0032991,macromolecular complex;GO:0043226,organelle;G…	GO:0043169,cation binding;GO:0005178,integrin binding;GO:0001968,fibronectin binding;GO:0032403,protein complex binding;GO:0005515,protein binding;GO:0005201,extracellular matrix structural constituent;GO:0043167,ion binding;GO:0008047,enzyme activator activity;GO:0030234,enzyme regulator activity;GO:0046872,metal ion binding;GO:0042802,identical protein binding;GO:0070051,fibrinogen binding;GO:0…
57	sp|P07358|CO8B_HUMAN	Complement component C8 beta chain OS=Homo sapiens GN=C8B PE=1 SV=3	up	2.10619	0.00918639	immune system process;regulation of biological process;positive regulation of biological process;cellular process;response to stimulus;biological regulation;metabolic process;death	extracellular region part;extracellular region;organelle;macromolecular complex;cell part;cell	binding		Complement and coagulation cascades;Systemic lupus erythematosus;Prion diseases;Amoebiasis	GO:0009894,regulation of catabolic process;GO:0002673,regulation of acute inflammatory response;GO:0065007,biological regulation;GO:0009605,response to external stimulus;GO:0031347,regulation of defense response;GO:0006950,response to stress;GO:0048584,positive regulation of response to stimulus;GO:0002252,immune effector process;GO:0030449,regulation of complement activation;GO:0043283,biopolyme…	GO:0031982,vesicle;GO:0070062,extracellular vesicular exosome;GO:0044464,cell part;GO:0043230,extracellular organelle;GO:0016021,integral to membrane;GO:0043227,membrane-bounded organelle;GO:0044421,extracellular region part;GO:0005615,extracellular space;GO:0043234,protein complex;GO:0005623,cell;GO:0032991,macromolecular complex;GO:0044425,membrane part;GO:0005579,membrane attack complex;GO:004…	GO:0032403,protein complex binding;GO:0005515,protein binding;GO:0005488,binding
58	sp|Q15084|PDIA6_HUMAN	Protein disulfide-isomerase A6 OS=Homo sapiens GN=PDIA6 PE=1 SV=1	down	0.488653	0.0160515	response to stimulus;biological adhesion;regulation of biological process;metabolic process;biological regulation;multicellular organismal process;cellular process	extracellular region part;organelle;cell part;membrane-enclosed lumen;extracellular region;cell;macromolecular complex;organelle part	binding;catalytic activity	Posttranslational modification, protein turnover, chaperones ; Energy production and conversion ;	Protein processing in endoplasmic reticulum	GO:0065007,biological regulation;GO:0034960,cellular biopolymer metabolic process;GO:0034109,homotypic cell-cell adhesion;GO:0009605,response to external stimulus;GO:0006950,response to stress;GO:0070527,platelet aggregation;GO:0044238,primary metabolic process;GO:0019725,cellular homeostasis;GO:0043283,biopolymer metabolic process;GO:0042592,homeostatic process;GO:0043170,macromolecule metabolic…	GO:0044446,intracellular organelle part;GO:0031982,vesicle;GO:0044422,organelle part;GO:0043233,organelle lumen;GO:0070062,extracellular vesicular exosome;GO:0005789,endoplasmic reticulum membrane;GO:0044464,cell part;GO:0043231,intracellular membrane-bounded organelle;GO:0031974,membrane-enclosed lumen;GO:0005623,cell;GO:0042175,nuclear envelope-endoplasmic reticulum network;GO:0044425,membrane …	GO:0005515,protein binding;GO:0003824,catalytic activity;GO:0005488,binding
59	sp|P00450|CERU_HUMAN	Ceruloplasmin OS=Homo sapiens GN=CP PE=1 SV=1	up	2.40732	0.000598518	response to stimulus;establishment of localization;developmental process;localization;metabolic process;biological regulation;multicellular organismal process;cellular process	extracellular region part;extracellular region;organelle;cell part;cell;organelle part	binding;catalytic activity	Secondary metabolites biosynthesis, transport and catabolism ;	Porphyrin and chlorophyll metabolism	GO:0065007,biological regulation;GO:0050801,ion homeostasis;GO:0031667,response to nutrient levels;GO:0000041,transition metal ion transport;GO:0009605,response to external stimulus;GO:0042221,response to chemical stimulus;GO:0048731,system development;GO:0019725,cellular homeostasis;GO:0042592,homeostatic process;GO:0030003,cellular cation homeostasis;GO:0010035,response to inorganic substance;G…	GO:0044446,intracellular organelle part;GO:0005765,lysosomal membrane;GO:0031982,vesicle;GO:0005764,lysosome;GO:0044422,organelle part;GO:0031225,anchored to membrane;GO:0070062,extracellular vesicular exosome;GO:0044464,cell part;GO:0043231,intracellular membrane-bounded organelle;GO:0005623,cell;GO:0044425,membrane part;GO:0046658,anchored to plasma membrane;GO:0005576,extracellular region;GO:0…	GO:0043169,cation binding;GO:0046872,metal ion binding;GO:0005515,protein binding;GO:0005507,copper ion binding;GO:0003824,catalytic activity;GO:0005488,binding;GO:0046914,transition metal ion binding;GO:0043167,ion binding;GO:0016491,oxidoreductase activity;GO:0051087,chaperone binding
60	sp|A0A0A0MS15|HV349_HUMAN	Immunoglobulin heavy variable 3-49 OS=Homo sapiens GN=IGHV3-49 PE=1 SV=1	up	6.14882	0.0341369					Fc epsilon RI signaling pathway;Viral myocarditis;Primary immunodeficiency;Staphylococcus aureus infection;Natural killer cell mediated cytotoxicity;Hematopoietic cell lineage;Asthma;Leishmaniasis;Phagosome;Systemic lupus erythematosus;Fc gamma R-mediated phagocytosis;Allograft rejection;B cell receptor signaling pathway;Dilated cardiomyopathy;Autoimmune thyroid disease;Intestinal immune network …
61	sp|P80108|PHLD_HUMAN	Phosphatidylinositol-glycan-specific phospholipase D OS=Homo sapiens GN=GPLD1 PE=1 SV=3	down	0.242948	0.00315246	immune system process;regulation of biological process;establishment of localization;positive regulation of biological process;developmental process;multicellular organismal process;cellular process;cell proliferation;response to stimulus;signaling;negative regulation of biological process;localization;locomotion;metabolic process;biological regulation;death	extracellular region part;extracellular region;organelle;macromolecular complex;cell part;cell;organelle part	binding;channel regulator activity;catalytic activity		Glycosylphosphatidylinositol(GPI)-anchor biosynthesis	GO:0009894,regulation of catabolic process;GO:0016477,cell migration;GO:0035303,regulation of dephosphorylation;GO:0042221,response to chemical stimulus;GO:0048731,system development;GO:0031326,regulation of cellular biosynthetic process;GO:0009892,negative regulation of metabolic process;GO:0008285,negative regulation of cell proliferation;GO:0040012,regulation of locomotion;GO:0009725,response …	GO:0044446,intracellular organelle part;GO:0005765,lysosomal membrane;GO:0032994,protein-lipid complex;GO:0031982,vesicle;GO:0005764,lysosome;GO:0044422,organelle part;GO:0070062,extracellular vesicular exosome;GO:0044464,cell part;GO:0043231,intracellular membrane-bounded organelle;GO:0005623,cell;GO:0034364,high-density lipoprotein particle;GO:0005576,extracellular region;GO:0044437,vacuolar pa…	GO:0005515,protein binding;GO:0015457,auxiliary transport protein activity;GO:0003824,catalytic activity;GO:0042578,phosphoric ester hydrolase activity;GO:0005488,binding;GO:0016788,hydrolase activity, acting on ester bonds;GO:0016247,channel regulator activity;GO:0016787,hydrolase activity
62	sp|P62258|1433E_HUMAN	14-3-3 protein epsilon OS=Homo sapiens GN=YWHAE PE=1 SV=1	down	0.48759	0.0115048	regulation of biological process;establishment of localization;developmental process;multicellular organismal process;cellular process;response to stimulus;signaling;viral reproduction;negative regulation of biological process;localization;locomotion;biological regulation;metabolic process;death	extracellular region part;extracellular region;organelle;macromolecular complex;cell part;cell;organelle part	enzyme regulator activity;binding;channel regulator activity;catalytic activity	Signal transduction mechanisms ;	Cell cycle;Neurotrophin signaling pathway;Oocyte meiosis;Pathogenic Escherichia coli infection	GO:0065007,biological regulation;GO:0016477,cell migration;GO:0050801,ion homeostasis;GO:0034960,cellular biopolymer metabolic process;GO:0050793,regulation of developmental process;GO:0048870,cell motility;GO:0007167,enzyme linked receptor protein signaling pathway;GO:0021987,cerebral cortex development;GO:0048731,system development;GO:0052548,regulation of endopeptidase activity;GO:0000278,mito…	GO:0044446,intracellular organelle part;GO:0031982,vesicle;GO:0044422,organelle part;GO:0070062,extracellular vesicular exosome;GO:0044464,cell part;GO:0043232,intracellular non-membrane-bounded organelle;GO:0043231,intracellular membrane-bounded organelle;GO:0005739,mitochondrion;GO:0030055,cell-substrate junction;GO:0005623,cell;GO:0044425,membrane part;GO:0005912,adherens junction;GO:0012505,e…	GO:0016597,amino acid binding;GO:0005515,protein binding;GO:0015457,auxiliary transport protein activity;GO:0003824,catalytic activity;GO:0019904,protein domain specific binding;GO:0051219,phosphoprotein binding;GO:0045309,protein phosphorylated amino acid binding;GO:0019899,enzyme binding;GO:0008426,protein kinase C inhibitor activity;GO:0016491,oxidoreductase activity;GO:0030234,enzyme regulato…
63	sp|P02652|APOA2_HUMAN	Apolipoprotein A-II OS=Homo sapiens GN=APOA2 PE=1 SV=1	up	4.28101	0.00392553	multi-organism process;positive regulation of biological process;developmental process;multicellular organismal process;cellular process;signaling;viral reproduction;negative regulation of biological process;biological regulation;metabolic process;immune system process;regulation of biological process;cellular component organization or biogenesis;establishment of localization;response to stimulus…	extracellular region part;organelle;cell part;membrane-enclosed lumen;extracellular region;cell;macromolecular complex;organelle part	enzyme regulator activity;transporter activity;binding		PPAR signaling pathway	GO:0009894,regulation of catabolic process;GO:0034960,cellular biopolymer metabolic process;GO:0006641,triglyceride metabolic process;GO:0060341,regulation of cellular localization;GO:0042221,response to chemical stimulus;GO:0048731,system development;GO:0009416,response to light stimulus;GO:0031326,regulation of cellular biosynthetic process;GO:0051046,regulation of secretion;GO:0051239,regulati…	GO:0044446,intracellular organelle part;GO:0034366,spherical high-density lipoprotein particle;GO:0032994,protein-lipid complex;GO:0031982,vesicle;GO:0044422,organelle part;GO:0043233,organelle lumen;GO:0070062,extracellular vesicular exosome;GO:0044464,cell part;GO:0005769,early endosome;GO:0043231,intracellular membrane-bounded organelle;GO:0031974,membrane-enclosed lumen;GO:0005623,cell;GO:003…	GO:0043169,cation binding;GO:0031210,phosphatidylcholine binding;GO:0008034,lipoprotein binding;GO:0042803,protein homodimerization activity;GO:0008289,lipid binding;GO:0005515,protein binding;GO:0050997,quaternary ammonium group binding;GO:0060228,phosphatidylcholine-sterol O-acyltransferase activator activity;GO:0043167,ion binding;GO:0043178,alcohol binding;GO:0005543,phospholipid binding;GO:0…
64	sp|P51884|LUM_HUMAN	Lumican OS=Homo sapiens GN=LUM PE=1 SV=2	up	2.52767	0.010644	response to stimulus;regulation of biological process;cellular component organization or biogenesis;positive regulation of biological process;developmental process;metabolic process;biological regulation;multicellular organismal process;cellular process	extracellular region part;extracellular region;organelle;cell part;cell;organelle part;membrane-enclosed lumen	structural molecule activity;binding	Function unknown ;		GO:0065007,biological regulation;GO:0010628,positive regulation of gene expression;GO:0031175,neuron projection development;GO:0045893,positive regulation of transcription, DNA-dependent;GO:0042221,response to chemical stimulus;GO:0000902,cell morphogenesis;GO:0048731,system development;GO:0031326,regulation of cellular biosynthetic process;GO:0009888,tissue development;GO:0030203,glycosaminoglyc…	GO:0044446,intracellular organelle part;GO:0044431,Golgi apparatus part;GO:0031982,vesicle;GO:0005764,lysosome;GO:0044422,organelle part;GO:0043233,organelle lumen;GO:0070062,extracellular vesicular exosome;GO:0005581,collagen;GO:0044464,cell part;GO:0005794,Golgi apparatus;GO:0044420,extracellular matrix part;GO:0005796,Golgi lumen;GO:0043231,intracellular membrane-bounded organelle;GO:0031974,m…	GO:0005198,structural molecule activity;GO:0005515,protein binding;GO:0005518,collagen binding;GO:0005488,binding;GO:0005201,extracellular matrix structural constituent
65	sp|O43790|KRT86_HUMAN	Keratin, type II cuticular Hb6 OS=Homo sapiens GN=KRT86 PE=1 SV=1	down	0.528344	0.0224251	developmental process;multicellular organismal process	extracellular region part;extracellular region;organelle;macromolecular complex;cell part;cell;organelle part	structural molecule activity;binding			GO:0007398,ectoderm development;GO:0042303,molting cycle;GO:0032502,developmental process;GO:0048731,system development;GO:0007568,aging;GO:0009888,tissue development;GO:0032501,multicellular organismal process;GO:0048856,anatomical structure development;GO:0008544,epidermis development;GO:0042633,hair cycle;GO:0007275,multicellular organismal development;GO:0048513,organ development	GO:0044446,intracellular organelle part;GO:0043229,intracellular organelle;GO:0031982,vesicle;GO:0044422,organelle part;GO:0070062,extracellular vesicular exosome;GO:0044464,cell part;GO:0043230,extracellular organelle;GO:0043227,membrane-bounded organelle;GO:0045111,intermediate filament cytoskeleton;GO:0043232,intracellular non-membrane-bounded organelle;GO:0044421,extracellular region part;GO:…	GO:0005198,structural molecule activity;GO:0005515,protein binding;GO:0005488,binding
66	sp|P04264|K2C1_HUMAN	Keratin, type II cytoskeletal 1 OS=Homo sapiens GN=KRT1 PE=1 SV=6	down	0.575275	0.0180078	immune system process;regulation of biological process;positive regulation of biological process;developmental process;multicellular organismal process;response to stimulus;negative regulation of biological process;biological regulation;metabolic process	extracellular region part;extracellular region;organelle;macromolecular complex;cell part;cell;organelle part	molecular transducer activity;structural molecule activity;binding	Cytoskeleton ;		GO:0065007,biological regulation;GO:0032102,negative regulation of response to external stimulus;GO:0048583,regulation of response to stimulus;GO:0050793,regulation of developmental process;GO:0009605,response to external stimulus;GO:0031347,regulation of defense response;GO:0006950,response to stress;GO:0042221,response to chemical stimulus;GO:0044238,primary metabolic process;GO:0048584,positiv…	GO:0044446,intracellular organelle part;GO:0043229,intracellular organelle;GO:0031982,vesicle;GO:0044422,organelle part;GO:0070062,extracellular vesicular exosome;GO:0044464,cell part;GO:0043230,extracellular organelle;GO:0043227,membrane-bounded organelle;GO:0045111,intermediate filament cytoskeleton;GO:0043232,intracellular non-membrane-bounded organelle;GO:0044421,extracellular region part;GO:…	GO:0005198,structural molecule activity;GO:0060089,molecular transducer activity;GO:0004871,signal transducer activity;GO:0004872,receptor activity;GO:0005515,protein binding;GO:0030246,carbohydrate binding;GO:0005488,binding
67	sp|P20851|C4BPB_HUMAN	C4b-binding protein beta chain OS=Homo sapiens GN=C4BPB PE=1 SV=1	up	2.10439	0.00742327	immune system process;regulation of biological process;positive regulation of biological process;multicellular organismal process;cellular process;response to stimulus;negative regulation of biological process;biological regulation;metabolic process	extracellular region part;extracellular region;cell part;cell	binding		Complement and coagulation cascades	GO:0009894,regulation of catabolic process;GO:0002673,regulation of acute inflammatory response;GO:0065007,biological regulation;GO:0002698,negative regulation of immune effector process;GO:0009605,response to external stimulus;GO:0031347,regulation of defense response;GO:0006950,response to stress;GO:0031324,negative regulation of cellular metabolic process;GO:0030449,regulation of complement ac…	GO:0005615,extracellular space;GO:0005576,extracellular region;GO:0044464,cell part;GO:0005623,cell;GO:0016020,membrane;GO:0005886,plasma membrane;GO:0044421,extracellular region part	GO:0005515,protein binding;GO:0005488,binding
68	sp|P09871|C1S_HUMAN	Complement C1s subcomponent OS=Homo sapiens GN=C1S PE=1 SV=1	up	1.833	0.0193078	immune system process;regulation of biological process;positive regulation of biological process;developmental process;multicellular organismal process;cellular process;response to stimulus;biological regulation;metabolic process	extracellular region part;extracellular region;organelle	binding;catalytic activity	Posttranslational modification, protein turnover, chaperones ;	Complement and coagulation cascades;Systemic lupus erythematosus;Staphylococcus aureus infection	GO:0065007,biological regulation;GO:0048583,regulation of response to stimulus;GO:0009605,response to external stimulus;GO:0006950,response to stress;GO:0042221,response to chemical stimulus;GO:0048731,system development;GO:0044238,primary metabolic process;GO:0048584,positive regulation of response to stimulus;GO:0002455,humoral immune response mediated by circulating immunoglobulin;GO:0002252,i…	GO:0031982,vesicle;GO:0043226,organelle;GO:0005576,extracellular region;GO:0070062,extracellular vesicular exosome;GO:0043230,extracellular organelle;GO:0065010,extracellular membrane-bounded organelle;GO:0031988,membrane-bounded vesicle;GO:0043227,membrane-bounded organelle;GO:0044421,extracellular region part	GO:0043169,cation binding;GO:0008233,peptidase activity;GO:0046872,metal ion binding;GO:0070011,peptidase activity, acting on L-amino acid peptides;GO:0017171,serine hydrolase activity;GO:0042802,identical protein binding;GO:0005515,protein binding;GO:0003824,catalytic activity;GO:0005488,binding;GO:0043167,ion binding;GO:0005509,calcium ion binding;GO:0008236,serine-type peptidase activity;GO:00…
69	sp|Q14126|DSG2_HUMAN	Desmoglein-2 OS=Homo sapiens GN=DSG2 PE=1 SV=2	up	2.772	0.0177069	reproductive process;reproduction;multi-organism process;cellular component organization or biogenesis;developmental process;multicellular organismal process;cellular process;response to stimulus;biological adhesion;death	extracellular region part;extracellular region;organelle;cell part;cell	binding		Arrhythmogenic right ventricular cardiomyopathy (ARVC)	GO:0008219,cell death;GO:0042221,response to chemical stimulus;GO:0009719,response to endogenous stimulus;GO:0032570,response to progesterone stimulus;GO:0032504,multicellular organism reproduction;GO:0012501,programmed cell death;GO:0032501,multicellular organismal process;GO:0007156,homophilic cell adhesion;GO:0006915,apoptosis;GO:0016337,cell-cell adhesion;GO:0010033,response to organic substa…	GO:0016328,lateral plasma membrane;GO:0031982,vesicle;GO:0043296,apical junction complex;GO:0070062,extracellular vesicular exosome;GO:0045177,apical part of cell;GO:0044464,cell part;GO:0043230,extracellular organelle;GO:0070161,anchoring junction;GO:0005911,cell-cell junction;GO:0016021,integral to membrane;GO:0043227,membrane-bounded organelle;GO:0044421,extracellular region part;GO:0005623,ce…	GO:0043167,ion binding;GO:0043169,cation binding;GO:0046872,metal ion binding;GO:0005509,calcium ion binding;GO:0005515,protein binding;GO:0050839,cell adhesion molecule binding;GO:0005488,binding
70	sp|P08571|CD14_HUMAN	Monocyte differentiation antigen CD14 OS=Homo sapiens GN=CD14 PE=1 SV=2	up	2.66225	0.0187606	immune system process;regulation of biological process;multi-organism process;establishment of localization;cellular component organization or biogenesis;positive regulation of biological process;multicellular organismal process;cellular process;response to stimulus;signaling;localization;biological regulation	extracellular region part;extracellular region;organelle;macromolecular complex;cell part;cell;organelle part	molecular transducer activity;binding		Toll-like receptor signaling pathway;Regulation of actin cytoskeleton;Phagosome;MAPK signaling pathway;Hematopoietic cell lineage;Amoebiasis;Pathogenic Escherichia coli infection	GO:0065007,biological regulation;GO:0031349,positive regulation of defense response;GO:0002218,activation of innate immune response;GO:0009605,response to external stimulus;GO:0007243,protein kinase cascade;GO:0031347,regulation of defense response;GO:0034097,response to cytokine stimulus;GO:0006950,response to stress;GO:0060341,regulation of cellular localization;GO:0042221,response to chemical …	GO:0044446,intracellular organelle part;GO:0031982,vesicle;GO:0044422,organelle part;GO:0031225,anchored to membrane;GO:0070062,extracellular vesicular exosome;GO:0044464,cell part;GO:0005794,Golgi apparatus;GO:0043231,intracellular membrane-bounded organelle;GO:0045121,membrane raft;GO:0005623,cell;GO:0044425,membrane part;GO:0046658,anchored to plasma membrane;GO:0005576,extracellular region;GO…	GO:0004872,receptor activity;GO:0001530,lipopolysaccharide binding;GO:0005515,protein binding;GO:0016019,peptidoglycan receptor activity;GO:0030247,polysaccharide binding;GO:0005488,binding;GO:0001846,opsonin binding;GO:0008329,pattern recognition receptor activity;GO:0060089,molecular transducer activity;GO:0004871,signal transducer activity;GO:0042834,peptidoglycan binding;GO:0030246,carbohydra…
71	sp|P06396|GELS_HUMAN	Gelsolin OS=Homo sapiens GN=GSN PE=1 SV=1	up	3.03509	0.0251739	reproduction;multi-organism process;positive regulation of biological process;developmental process;multicellular organismal process;cellular process;growth;signaling;viral reproduction;negative regulation of biological process;metabolic process;biological regulation;death;reproductive process;regulation of biological process;cellular component organization or biogenesis;establishment of localiza…	extracellular region part;extracellular region;organelle;macromolecular complex;cell part;cell;organelle part	binding		Regulation of actin cytoskeleton;Fc gamma R-mediated phagocytosis	GO:0065007,biological regulation;GO:0009605,response to external stimulus;GO:0006950,response to stress;GO:0042221,response to chemical stimulus;GO:0000902,cell morphogenesis;GO:0048731,system development;GO:0042246,tissue regeneration;GO:0045471,response to ethanol;GO:0009888,tissue development;GO:0031324,negative regulation of cellular metabolic process;GO:0009892,negative regulation of metabol…	GO:0044446,intracellular organelle part;GO:0005938,cell cortex;GO:0031982,vesicle;GO:0044422,organelle part;GO:0070062,extracellular vesicular exosome;GO:0044464,cell part;GO:0043232,intracellular non-membrane-bounded organelle;GO:0016528,sarcoplasm;GO:0043231,intracellular membrane-bounded organelle;GO:0030055,cell-substrate junction;GO:0005634,nucleus;GO:0005623,cell;GO:0044425,membrane part;GO…	GO:0043169,cation binding;GO:0046872,metal ion binding;GO:0005515,protein binding;GO:0019904,protein domain specific binding;GO:0005488,binding;GO:0043167,ion binding;GO:0008092,cytoskeletal protein binding;GO:0005509,calcium ion binding
72	sp|P05160|F13B_HUMAN	Coagulation factor XIII B chain OS=Homo sapiens GN=F13B PE=1 SV=3	down	0.329718	0.0038706	response to stimulus;biological regulation;multicellular organismal process	extracellular region			Complement and coagulation cascades	GO:0065007,biological regulation;GO:0042060,wound healing;GO:0007596,blood coagulation;GO:0009611,response to wounding;GO:0009605,response to external stimulus;GO:0006950,response to stress;GO:0007599,hemostasis;GO:0032501,multicellular organismal process;GO:0050896,response to stimulus;GO:0050817,coagulation;GO:0065008,regulation of biological quality;GO:0050878,regulation of body fluid levels	GO:0005576,extracellular region
73	sp|P00748|FA12_HUMAN	Coagulation factor XII OS=Homo sapiens GN=F12 PE=1 SV=3	down	0.597254	0.00137893	immune system process;regulation of biological process;positive regulation of biological process;multicellular organismal process;cellular process;response to stimulus;negative regulation of biological process;biological regulation;metabolic process	extracellular region part;extracellular region;organelle;cell part;cell	binding;catalytic activity	Posttranslational modification, protein turnover, chaperones ;	Complement and coagulation cascades	GO:0009894,regulation of catabolic process;GO:0002673,regulation of acute inflammatory response;GO:0065007,biological regulation;GO:0009605,response to external stimulus;GO:0031347,regulation of defense response;GO:0051919,positive regulation of fibrinolysis;GO:0006950,response to stress;GO:0042221,response to chemical stimulus;GO:0009607,response to biotic stimulus;GO:0051239,regulation of multi…	GO:0005615,extracellular space;GO:0005623,cell;GO:0031982,vesicle;GO:0043226,organelle;GO:0005886,plasma membrane;GO:0005576,extracellular region;GO:0070062,extracellular vesicular exosome;GO:0044464,cell part;GO:0043230,extracellular organelle;GO:0065010,extracellular membrane-bounded organelle;GO:0043227,membrane-bounded organelle;GO:0031988,membrane-bounded vesicle;GO:0016020,membrane;GO:00444…	GO:0043169,cation binding;GO:0008233,peptidase activity;GO:0046872,metal ion binding;GO:0070011,peptidase activity, acting on L-amino acid peptides;GO:0017171,serine hydrolase activity;GO:0005515,protein binding;GO:0003824,catalytic activity;GO:0005488,binding;GO:0043167,ion binding;GO:0005509,calcium ion binding;GO:0008236,serine-type peptidase activity;GO:0016787,hydrolase activity;GO:0004252,s…
74	sp|P06727|APOA4_HUMAN	Apolipoprotein A-IV OS=Homo sapiens GN=APOA4 PE=1 SV=3	down	0.367299	0.00800513	immune system process;regulation of biological process;establishment of localization;cellular component organization or biogenesis;positive regulation of biological process;developmental process;multicellular organismal process;cellular process;response to stimulus;biological adhesion;signaling;negative regulation of biological process;localization;biological regulation;metabolic process	extracellular region part;organelle;cell part;membrane-enclosed lumen;extracellular region;cell;macromolecular complex;organelle part	enzyme regulator activity;transporter activity;binding;antioxidant activity			GO:0009894,regulation of catabolic process;GO:0034960,cellular biopolymer metabolic process;GO:0050748,negative regulation of lipoprotein metabolic process;GO:0042221,response to chemical stimulus;GO:0034014,response to triglyceride;GO:0048731,system development;GO:0009416,response to light stimulus;GO:0031326,regulation of cellular biosynthetic process;GO:0000904,cell morphogenesis involved in d…	GO:0044446,intracellular organelle part;GO:0032994,protein-lipid complex;GO:0031982,vesicle;GO:0044422,organelle part;GO:0043233,organelle lumen;GO:0070062,extracellular vesicular exosome;GO:0044464,cell part;GO:0005769,early endosome;GO:0043231,intracellular membrane-bounded organelle;GO:0031974,membrane-enclosed lumen;GO:0005623,cell;GO:0034364,high-density lipoprotein particle;GO:0005576,extra…	GO:0043169,cation binding;GO:0031210,phosphatidylcholine binding;GO:0042803,protein homodimerization activity;GO:0008289,lipid binding;GO:0005515,protein binding;GO:0005507,copper ion binding;GO:0046914,transition metal ion binding;GO:0050997,quaternary ammonium group binding;GO:0060228,phosphatidylcholine-sterol O-acyltransferase activator activity;GO:0016209,antioxidant activity;GO:0043167,ion …
75	sp|P04406|G3P_HUMAN	Glyceraldehyde-3-phosphate dehydrogenase OS=Homo sapiens GN=GAPDH PE=1 SV=3	down	0.434035	0.0290173	immune system process;regulation of biological process;cellular component organization or biogenesis;cellular process;response to stimulus;negative regulation of biological process;biological regulation;metabolic process;death	extracellular region part;extracellular region;organelle;macromolecular complex;cell part;cell;organelle part	binding;catalytic activity	Carbohydrate transport and metabolism ;	Metabolic pathways;Alzheimer's disease;Glycolysis / Gluconeogenesis;Microbial metabolism in diverse environments	GO:0065007,biological regulation;GO:0060255,regulation of macromolecule metabolic process;GO:0019318,hexose metabolic process;GO:0010558,negative regulation of macromolecule biosynthetic process;GO:0044238,primary metabolic process;GO:0031326,regulation of cellular biosynthetic process;GO:0031324,negative regulation of cellular metabolic process;GO:0009892,negative regulation of metabolic process…	GO:0044446,intracellular organelle part;GO:0030529,ribonucleoprotein complex;GO:0031965,nuclear membrane;GO:0031967,organelle envelope;GO:0031982,vesicle;GO:0044422,organelle part;GO:0070062,extracellular vesicular exosome;GO:0044464,cell part;GO:0043232,intracellular non-membrane-bounded organelle;GO:0043231,intracellular membrane-bounded organelle;GO:0005634,nucleus;GO:0005623,cell;GO:0012505,e…	GO:0000166,nucleotide binding;GO:0042802,identical protein binding;GO:0005515,protein binding;GO:0003824,catalytic activity;GO:0005488,binding;GO:0008092,cytoskeletal protein binding;GO:0050661,NADP or NADPH binding;GO:0016491,oxidoreductase activity;GO:0048037,cofactor binding;GO:0050662,coenzyme binding
76	sp|Q16610|ECM1_HUMAN	Extracellular matrix protein 1 OS=Homo sapiens GN=ECM1 PE=1 SV=2	down	0.621735	0.0160029	immune system process;regulation of biological process;positive regulation of biological process;developmental process;multicellular organismal process;cellular process;cell proliferation;response to stimulus;signaling;negative regulation of biological process;localization;locomotion;biological regulation;metabolic process	extracellular region part;extracellular region;organelle	molecular transducer activity;binding			GO:0065007,biological regulation;GO:0010740,positive regulation of protein kinase cascade;GO:0045766,positive regulation of angiogenesis;GO:0050793,regulation of developmental process;GO:0009605,response to external stimulus;GO:0006950,response to stress;GO:0031326,regulation of cellular biosynthetic process;GO:0070168,negative regulation of biomineral formation;GO:0051239,regulation of multicell…	GO:0005615,extracellular space;GO:0005578,proteinaceous extracellular matrix;GO:0031982,vesicle;GO:0043226,organelle;GO:0031012,extracellular matrix;GO:0005576,extracellular region;GO:0070062,extracellular vesicular exosome;GO:0043230,extracellular organelle;GO:0065010,extracellular membrane-bounded organelle;GO:0043227,membrane-bounded organelle;GO:0031988,membrane-bounded vesicle;GO:0044421,ext…	GO:0008083,growth factor activity;GO:0005515,protein binding;GO:0050840,extracellular matrix binding;GO:0005488,binding;GO:0004871,signal transducer activity;GO:0060089,molecular transducer activity;GO:0019899,enzyme binding;GO:0002020,protease binding;GO:0008022,protein C-terminus binding;GO:0005102,receptor binding;GO:0043236,laminin binding
77	sp|Q96PD5|PGRP2_HUMAN	N-acetylmuramoyl-L-alanine amidase OS=Homo sapiens GN=PGLYRP2 PE=1 SV=1	up	2.16171	0.0106186	immune system process;regulation of biological process;multi-organism process;positive regulation of biological process;developmental process;multicellular organismal process;cellular process;response to stimulus;growth;signaling;negative regulation of biological process;biological regulation;metabolic process	extracellular region part;extracellular region;organelle;cell part;cell	molecular transducer activity;binding;catalytic activity	Cell wall/membrane/envelope biogenesis ;		GO:0065007,biological regulation;GO:0031349,positive regulation of defense response;GO:0050793,regulation of developmental process;GO:0009617,response to bacterium;GO:0002218,activation of innate immune response;GO:0009605,response to external stimulus;GO:0031347,regulation of defense response;GO:0006950,response to stress;GO:0002694,regulation of leukocyte activation;GO:0048584,positive regulati…	GO:0005623,cell;GO:0031982,vesicle;GO:0043226,organelle;GO:0005622,intracellular;GO:0005576,extracellular region;GO:0070062,extracellular vesicular exosome;GO:0044464,cell part;GO:0043230,extracellular organelle;GO:0065010,extracellular membrane-bounded organelle;GO:0031988,membrane-bounded vesicle;GO:0043227,membrane-bounded organelle;GO:0016020,membrane;GO:0044421,extracellular region part	GO:0043169,cation binding;GO:0004872,receptor activity;GO:0016019,peptidoglycan receptor activity;GO:0003824,catalytic activity;GO:0030247,polysaccharide binding;GO:0046914,transition metal ion binding;GO:0043167,ion binding;GO:0060089,molecular transducer activity;GO:0004871,signal transducer activity;GO:0042834,peptidoglycan binding;GO:0016810,hydrolase activity, acting on carbon-nitrogen (but …
78	sp|P07357|CO8A_HUMAN	Complement component C8 alpha chain OS=Homo sapiens GN=C8A PE=1 SV=2	up	2.27155	0.00573078	immune system process;regulation of biological process;positive regulation of biological process;cellular process;response to stimulus;biological regulation;metabolic process;death	extracellular region part;extracellular region;organelle;macromolecular complex;cell part;cell	binding		Complement and coagulation cascades;Systemic lupus erythematosus;Prion diseases;Amoebiasis	GO:0009894,regulation of catabolic process;GO:0002673,regulation of acute inflammatory response;GO:0065007,biological regulation;GO:0009605,response to external stimulus;GO:0031347,regulation of defense response;GO:0006950,response to stress;GO:0048584,positive regulation of response to stimulus;GO:0002252,immune effector process;GO:0030449,regulation of complement activation;GO:0043283,biopolyme…	GO:0031982,vesicle;GO:0070062,extracellular vesicular exosome;GO:0044464,cell part;GO:0043230,extracellular organelle;GO:0016021,integral to membrane;GO:0043227,membrane-bounded organelle;GO:0044421,extracellular region part;GO:0043234,protein complex;GO:0005623,cell;GO:0032991,macromolecular complex;GO:0044425,membrane part;GO:0005579,membrane attack complex;GO:0043226,organelle;GO:0005886,plasm…	GO:0032403,protein complex binding;GO:0001848,complement binding;GO:0005515,protein binding;GO:0005488,binding
79	sp|P01859|IGHG2_HUMAN	Ig gamma-2 chain C region OS=Homo sapiens GN=IGHG2 PE=1 SV=2	up	2.33697	0.00649485	immune system process;regulation of biological process;multi-organism process;establishment of localization;cellular component organization or biogenesis;positive regulation of biological process;multicellular organismal process;cellular process;response to stimulus;signaling;localization;biological regulation;metabolic process	extracellular region part;extracellular region;organelle;macromolecular complex;cell part;cell	binding		Fc epsilon RI signaling pathway;Viral myocarditis;Primary immunodeficiency;Staphylococcus aureus infection;Natural killer cell mediated cytotoxicity;Hematopoietic cell lineage;Asthma;Leishmaniasis;Phagosome;Systemic lupus erythematosus;Fc gamma R-mediated phagocytosis;Allograft rejection;B cell receptor signaling pathway;Dilated cardiomyopathy;Autoimmune thyroid disease;Intestinal immune network …	GO:0065007,biological regulation;GO:0009617,response to bacterium;GO:0009605,response to external stimulus;GO:0006950,response to stress;GO:0002694,regulation of leukocyte activation;GO:0048584,positive regulation of response to stimulus;GO:0009607,response to biotic stimulus;GO:0002252,immune effector process;GO:0007154,cell communication;GO:0043283,biopolymer metabolic process;GO:0016044,membra…	GO:0031982,vesicle;GO:0070062,extracellular vesicular exosome;GO:0044464,cell part;GO:0043230,extracellular organelle;GO:0043227,membrane-bounded organelle;GO:0044421,extracellular region part;GO:0005615,extracellular space;GO:0043234,protein complex;GO:0019814,immunoglobulin complex;GO:0005623,cell;GO:0032991,macromolecular complex;GO:0044425,membrane part;GO:0009986,cell surface;GO:0043226,orga…	GO:0003823,antigen binding;GO:0005515,protein binding;GO:0034987,immunoglobulin receptor binding;GO:0005102,receptor binding;GO:0005488,binding
80	sp|P02655|APOC2_HUMAN	Apolipoprotein C-II OS=Homo sapiens GN=APOC2 PE=1 SV=1	down	0.40443	0.000493745	regulation of biological process;establishment of localization;cellular component organization or biogenesis;positive regulation of biological process;multicellular organismal process;cellular process;response to stimulus;signaling;negative regulation of biological process;localization;biological regulation;metabolic process	extracellular region part;extracellular region;organelle;macromolecular complex;cell part;cell	enzyme regulator activity;binding			GO:0009894,regulation of catabolic process;GO:0009416,response to light stimulus;GO:0031326,regulation of cellular biosynthetic process;GO:0009892,negative regulation of metabolic process;GO:0043086,negative regulation of catalytic activity;GO:0060193,positive regulation of lipase activity;GO:0034382,chylomicron remnant clearance;GO:0032375,negative regulation of cholesterol transport;GO:0006775,…	GO:0043229,intracellular organelle;GO:0044444,cytoplasmic part;GO:0034366,spherical high-density lipoprotein particle;GO:0005768,endosome;GO:0032994,protein-lipid complex;GO:0034361,very-low-density lipoprotein particle;GO:0031982,vesicle;GO:0070062,extracellular vesicular exosome;GO:0044464,cell part;GO:0043230,extracellular organelle;GO:0043227,membrane-bounded organelle;GO:0034385,triglyceride…	GO:0042803,protein homodimerization activity;GO:0008289,lipid binding;GO:0042802,identical protein binding;GO:0005515,protein binding;GO:0005488,binding;GO:0046983,protein dimerization activity;GO:0060230,lipoprotein lipase activator activity;GO:0060229,lipase activator activity;GO:0019899,enzyme binding;GO:0055102,lipase inhibitor activity;GO:0008047,enzyme activator activity;GO:0030234,enzyme r…
81	sp|P27169|PON1_HUMAN	Serum paraoxonase/arylesterase 1 OS=Homo sapiens GN=PON1 PE=1 SV=3	up	7.22734	0.000183199	regulation of biological process;establishment of localization;positive regulation of biological process;multicellular organismal process;cellular process;response to stimulus;negative regulation of biological process;localization;biological regulation;metabolic process	extracellular region part;extracellular region;organelle;macromolecular complex;cell part;cell	binding;catalytic activity;antioxidant activity		Metabolic pathways;Microbial metabolism in diverse environments	GO:0065007,biological regulation;GO:0016054,organic acid catabolic process;GO:0006576,biogenic amine metabolic process;GO:0009605,response to external stimulus;GO:0019637,organophosphate metabolic process;GO:0050748,negative regulation of lipoprotein metabolic process;GO:0042221,response to chemical stimulus;GO:0032370,positive regulation of lipid transport;GO:0031324,negative regulation of cellu…	GO:0043229,intracellular organelle;GO:0034366,spherical high-density lipoprotein particle;GO:0032994,protein-lipid complex;GO:0031982,vesicle;GO:0070062,extracellular vesicular exosome;GO:0044464,cell part;GO:0043230,extracellular organelle;GO:0043227,membrane-bounded organelle;GO:0044421,extracellular region part;GO:0043231,intracellular membrane-bounded organelle;GO:0005615,extracellular space;…	GO:0043169,cation binding;GO:0008034,lipoprotein binding;GO:0042803,protein homodimerization activity;GO:0008289,lipid binding;GO:0005515,protein binding;GO:0003824,catalytic activity;GO:0004064,arylesterase activity;GO:0042578,phosphoric ester hydrolase activity;GO:0016788,hydrolase activity, acting on ester bonds;GO:0043167,ion binding;GO:0016209,antioxidant activity;GO:0005543,phospholipid bin…
82	sp|O75636|FCN3_HUMAN	Ficolin-3 OS=Homo sapiens GN=FCN3 PE=1 SV=2	up	1.51383	0.0367631	reproduction;multi-organism process;positive regulation of biological process;multicellular organismal process;cellular process;viral reproduction;negative regulation of biological process;biological regulation;metabolic process;immune system process;reproductive process;regulation of biological process;cellular component organization or biogenesis;establishment of localization;response to stimul…	extracellular region part;extracellular region;cell part;cell	binding			GO:0065007,biological regulation;GO:0048583,regulation of response to stimulus;GO:0009605,response to external stimulus;GO:0006950,response to stress;GO:0044238,primary metabolic process;GO:0048584,positive regulation of response to stimulus;GO:0009607,response to biotic stimulus;GO:0002252,immune effector process;GO:0009615,response to virus;GO:0048525,negative regulation of viral reproduction;G…	GO:0005623,cell;GO:0005578,proteinaceous extracellular matrix;GO:0031012,extracellular matrix;GO:0005576,extracellular region;GO:0005581,collagen;GO:0044464,cell part;GO:0044420,extracellular matrix part;GO:0016020,membrane;GO:0044421,extracellular region part	GO:0043167,ion binding;GO:0043169,cation binding;GO:0046872,metal ion binding;GO:0003823,antigen binding;GO:0005515,protein binding;GO:0030246,carbohydrate binding;GO:0005488,binding
83	sp|P25311|ZA2G_HUMAN	Zinc-alpha-2-glycoprotein OS=Homo sapiens GN=AZGP1 PE=1 SV=2	down	0.560527	0.00400703	immune system process;regulation of biological process;establishment of localization;multicellular organismal process;cellular process;cell proliferation;response to stimulus;biological adhesion;negative regulation of biological process;localization;biological regulation	extracellular region part;extracellular region;organelle;macromolecular complex;cell part;cell	transporter activity;binding;catalytic activity		Cell adhesion molecules (CAMs);Phagosome;Viral myocarditis;Graft-versus-host disease;Endocytosis;Antigen processing and presentation;Natural killer cell mediated cytotoxicity;Allograft rejection;Autoimmune thyroid disease;Type I diabetes mellitus	GO:0050877,neurological system process;GO:0065007,biological regulation;GO:0051606,detection of stimulus;GO:0009593,detection of chemical stimulus;GO:0048523,negative regulation of cellular process;GO:0042221,response to chemical stimulus;GO:0007600,sensory perception;GO:0032501,multicellular organismal process;GO:0060249,anatomical structure homeostasis;GO:0008285,negative regulation of cell pro…	GO:0043229,intracellular organelle;GO:0031982,vesicle;GO:0070062,extracellular vesicular exosome;GO:0044464,cell part;GO:0043230,extracellular organelle;GO:0043227,membrane-bounded organelle;GO:0044421,extracellular region part;GO:0043231,intracellular membrane-bounded organelle;GO:0005615,extracellular space;GO:0044424,intracellular part;GO:0043234,protein complex;GO:0005634,nucleus;GO:0032991,m…	GO:0003823,antigen binding;GO:0001948,glycoprotein binding;GO:0005515,protein binding;GO:0003824,catalytic activity;GO:0005488,binding;GO:0016788,hydrolase activity, acting on ester bonds;GO:0008565,protein transporter activity;GO:0022892,substrate-specific transporter activity;GO:0005215,transporter activity;GO:0022857,transmembrane transporter activity;GO:0022891,substrate-specific transmembran…
84	sp|P19823|ITIH2_HUMAN	Inter-alpha-trypsin inhibitor heavy chain H2 OS=Homo sapiens GN=ITIH2 PE=1 SV=2	up	10.6028	0.0164182	regulation of biological process;metabolic process;biological regulation	extracellular region part;extracellular region;organelle	enzyme regulator activity	General function prediction only ;	Arrhythmogenic right ventricular cardiomyopathy (ARVC);MAPK signaling pathway;Dilated cardiomyopathy;Hypertrophic cardiomyopathy (HCM);Cardiac muscle contraction	GO:0065007,biological regulation;GO:0050790,regulation of catalytic activity;GO:0044238,primary metabolic process;GO:0010466,negative regulation of peptidase activity;GO:0052548,regulation of endopeptidase activity;GO:0030203,glycosaminoglycan metabolic process;GO:0043283,biopolymer metabolic process;GO:0006807,nitrogen compound metabolic process;GO:0008152,metabolic process;GO:0065009,regulation…	GO:0031982,vesicle;GO:0043226,organelle;GO:0005576,extracellular region;GO:0070062,extracellular vesicular exosome;GO:0043230,extracellular organelle;GO:0065010,extracellular membrane-bounded organelle;GO:0031988,membrane-bounded vesicle;GO:0043227,membrane-bounded organelle;GO:0044421,extracellular region part	GO:0004867,serine-type endopeptidase inhibitor activity;GO:0030234,enzyme regulator activity;GO:0030414,peptidase inhibitor activity;GO:0004866,endopeptidase inhibitor activity;GO:0004857,enzyme inhibitor activity
85	sp|P01857|IGHG1_HUMAN	Ig gamma-1 chain C region OS=Homo sapiens GN=IGHG1 PE=1 SV=1	up	9.60993	2.39e-05					Fc epsilon RI signaling pathway;Viral myocarditis;Primary immunodeficiency;Staphylococcus aureus infection;Natural killer cell mediated cytotoxicity;Hematopoietic cell lineage;Asthma;Leishmaniasis;Phagosome;Systemic lupus erythematosus;Fc gamma R-mediated phagocytosis;Allograft rejection;B cell receptor signaling pathway;Dilated cardiomyopathy;Autoimmune thyroid disease;Intestinal immune network …
86	sp|P02760|AMBP_HUMAN	Protein AMBP OS=Homo sapiens GN=AMBP PE=1 SV=1	up	2.22801	0.00936281	reproduction;multi-organism process;cellular process;signaling;viral reproduction;negative regulation of biological process;biological regulation;metabolic process;immune system process;reproductive process;regulation of biological process;cellular component organization or biogenesis;establishment of localization;biological adhesion;response to stimulus;localization	extracellular region part;extracellular region;organelle;cell part;cell	enzyme regulator activity;binding;channel regulator activity		Complement and coagulation cascades	GO:0065007,biological regulation;GO:0034960,cellular biopolymer metabolic process;GO:0042440,pigment metabolic process;GO:0052548,regulation of endopeptidase activity;GO:0046483,heterocycle metabolic process;GO:0050777,negative regulation of immune response;GO:0043283,biopolymer metabolic process;GO:0016044,membrane organization;GO:0009966,regulation of signal transduction;GO:0043086,negative reg…	GO:0043229,intracellular organelle;GO:0031982,vesicle;GO:0070062,extracellular vesicular exosome;GO:0044464,cell part;GO:0043230,extracellular organelle;GO:0043227,membrane-bounded organelle;GO:0044421,extracellular region part;GO:0043231,intracellular membrane-bounded organelle;GO:0044424,intracellular part;GO:0005623,cell;GO:0009986,cell surface;GO:0043226,organelle;GO:0005886,plasma membrane;G…	GO:0043169,cation binding;GO:0042803,protein homodimerization activity;GO:0046906,tetrapyrrole binding;GO:0032403,protein complex binding;GO:0005515,protein binding;GO:0015457,auxiliary transport protein activity;GO:0005506,iron ion binding;GO:0046914,transition metal ion binding;GO:0043167,ion binding;GO:0004867,serine-type endopeptidase inhibitor activity;GO:0020037,heme binding;GO:0030234,enzy…
87	sp|P33151|CADH5_HUMAN	Cadherin-5 OS=Homo sapiens GN=CDH5 PE=1 SV=5	up	2.25224	0.00696723	regulation of biological process;cellular component organization or biogenesis;developmental process;multicellular organismal process;cellular process;cell proliferation;response to stimulus;biological adhesion;signaling;negative regulation of biological process;biological regulation	cell part;cell	binding		Cell adhesion molecules (CAMs);Leukocyte transendothelial migration	GO:0065007,biological regulation;GO:0007167,enzyme linked receptor protein signaling pathway;GO:0048731,system development;GO:0001944,vasculature development;GO:0007154,cell communication;GO:0008285,negative regulation of cell proliferation;GO:0007178,transmembrane receptor protein serine/threonine kinase signaling pathway;GO:0001568,blood vessel development;GO:0009987,cellular process;GO:0007155…	GO:0043296,apical junction complex;GO:0044464,cell part;GO:0070161,anchoring junction;GO:0005911,cell-cell junction;GO:0016021,integral to membrane;GO:0005623,cell;GO:0009986,cell surface;GO:0005912,adherens junction;GO:0044425,membrane part;GO:0005886,plasma membrane;GO:0009897,external side of plasma membrane;GO:0030054,cell junction;GO:0031224,intrinsic to membrane;GO:0044459,plasma membrane p…	GO:0043169,cation binding;GO:0046872,metal ion binding;GO:0019902,phosphatase binding;GO:0005515,protein binding;GO:0005488,binding;GO:0043167,ion binding;GO:0008013,beta-catenin binding;GO:0005509,calcium ion binding;GO:0019899,enzyme binding;GO:0005102,receptor binding;GO:0019903,protein phosphatase binding
88	sp|P03952|KLKB1_HUMAN	Plasma kallikrein OS=Homo sapiens GN=KLKB1 PE=1 SV=1	up	5.05773	0.0140784	response to stimulus;regulation of biological process;cellular component organization or biogenesis;positive regulation of biological process;negative regulation of biological process;metabolic process;biological regulation;multicellular organismal process;cellular process	extracellular region part;extracellular region;organelle;cell part;cell	binding;catalytic activity	Posttranslational modification, protein turnover, chaperones ;	Complement and coagulation cascades	GO:0009894,regulation of catabolic process;GO:0002673,regulation of acute inflammatory response;GO:0065007,biological regulation;GO:0009605,response to external stimulus;GO:0031347,regulation of defense response;GO:0051919,positive regulation of fibrinolysis;GO:0006950,response to stress;GO:0043283,biopolymer metabolic process;GO:0042176,regulation of protein catabolic process;GO:0043170,macromol…	GO:0005615,extracellular space;GO:0005623,cell;GO:0031982,vesicle;GO:0043226,organelle;GO:0005886,plasma membrane;GO:0005576,extracellular region;GO:0070062,extracellular vesicular exosome;GO:0044464,cell part;GO:0043230,extracellular organelle;GO:0065010,extracellular membrane-bounded organelle;GO:0043227,membrane-bounded organelle;GO:0031988,membrane-bounded vesicle;GO:0016020,membrane;GO:00444…	GO:0043169,cation binding;GO:0042803,protein homodimerization activity;GO:0046906,tetrapyrrole binding;GO:0017171,serine hydrolase activity;GO:0005515,protein binding;GO:0005506,iron ion binding;GO:0003824,catalytic activity;GO:0046914,transition metal ion binding;GO:0043167,ion binding;GO:0016491,oxidoreductase activity;GO:0020037,heme binding;GO:0008236,serine-type peptidase activity;GO:0008233…
89	sp|Q08380|LG3BP_HUMAN	Galectin-3-binding protein OS=Homo sapiens GN=LGALS3BP PE=1 SV=1	up	1.56996	0.0419141	regulation of biological process;establishment of localization;cellular component organization or biogenesis;cellular process;biological adhesion;response to stimulus;signaling;localization;biological regulation	extracellular region part;extracellular region;organelle;cell part;cell	molecular transducer activity;binding		Salivary secretion	GO:0006952,defense response;GO:0065007,biological regulation;GO:0006950,response to stress;GO:0010324,membrane invagination;GO:0007154,cell communication;GO:0016044,membrane organization;GO:0051234,establishment of localization;GO:0022610,biological adhesion;GO:0006968,cellular defense response;GO:0050789,regulation of biological process;GO:0016192,vesicle-mediated transport;GO:0050794,regulation…	GO:0005623,cell;GO:0005578,proteinaceous extracellular matrix;GO:0031982,vesicle;GO:0043226,organelle;GO:0031012,extracellular matrix;GO:0005576,extracellular region;GO:0070062,extracellular vesicular exosome;GO:0044464,cell part;GO:0043230,extracellular organelle;GO:0065010,extracellular membrane-bounded organelle;GO:0043227,membrane-bounded organelle;GO:0031988,membrane-bounded vesicle;GO:00160…	GO:0060089,molecular transducer activity;GO:0004871,signal transducer activity;GO:0004872,receptor activity;GO:0005515,protein binding;GO:0005488,binding;GO:0004888,transmembrane receptor activity
90	sp|Q9UK55|ZPI_HUMAN	Protein Z-dependent protease inhibitor OS=Homo sapiens GN=SERPINA10 PE=1 SV=1	down	0.338806	0.0288671	reproductive process;reproduction;regulation of biological process;establishment of localization;developmental process;multicellular organismal process;cellular process;response to stimulus;growth;localization;biological regulation;metabolic process	extracellular region part;extracellular region;organelle	enzyme regulator activity;binding	Posttranslational modification, protein turnover, chaperones ;	Complement and coagulation cascades	GO:0065007,biological regulation;GO:0009605,response to external stimulus;GO:0006950,response to stress;GO:0060341,regulation of cellular localization;GO:0048731,system development;GO:0042246,tissue regeneration;GO:0052548,regulation of endopeptidase activity;GO:0009888,tissue development;GO:0048589,developmental growth;GO:0051046,regulation of secretion;GO:0040007,growth;GO:0065009,regulation of…	GO:0005615,extracellular space;GO:0031982,vesicle;GO:0043226,organelle;GO:0005576,extracellular region;GO:0070062,extracellular vesicular exosome;GO:0043230,extracellular organelle;GO:0065010,extracellular membrane-bounded organelle;GO:0043227,membrane-bounded organelle;GO:0031988,membrane-bounded vesicle;GO:0044421,extracellular region part	GO:0030247,polysaccharide binding;GO:0005488,binding;GO:0004867,serine-type endopeptidase inhibitor activity;GO:0008201,heparin binding;GO:0004866,endopeptidase inhibitor activity;GO:0030414,peptidase inhibitor activity;GO:0030234,enzyme regulator activity;GO:0004857,enzyme inhibitor activity;GO:0030246,carbohydrate binding;GO:0005539,glycosaminoglycan binding;GO:0001871,pattern binding
91	sp|P03951|FA11_HUMAN	Coagulation factor XI OS=Homo sapiens GN=F11 PE=1 SV=1	up	1.60221	0.0492992	response to stimulus;regulation of biological process;positive regulation of biological process;negative regulation of biological process;metabolic process;biological regulation;multicellular organismal process	extracellular region part;extracellular region;organelle;cell part;cell	binding;catalytic activity	Posttranslational modification, protein turnover, chaperones ;	Complement and coagulation cascades	GO:0065007,biological regulation;GO:0009605,response to external stimulus;GO:0051919,positive regulation of fibrinolysis;GO:0006950,response to stress;GO:0044238,primary metabolic process;GO:0050817,coagulation;GO:0032501,multicellular organismal process;GO:0031639,plasminogen activation;GO:0050878,regulation of body fluid levels;GO:0043283,biopolymer metabolic process;GO:0008152,metabolic proces…	GO:0005615,extracellular space;GO:0005623,cell;GO:0031982,vesicle;GO:0043226,organelle;GO:0005886,plasma membrane;GO:0005576,extracellular region;GO:0070062,extracellular vesicular exosome;GO:0044464,cell part;GO:0043230,extracellular organelle;GO:0065010,extracellular membrane-bounded organelle;GO:0043227,membrane-bounded organelle;GO:0031988,membrane-bounded vesicle;GO:0016020,membrane;GO:00444…	GO:0008233,peptidase activity;GO:0070011,peptidase activity, acting on L-amino acid peptides;GO:0017171,serine hydrolase activity;GO:0005515,protein binding;GO:0003824,catalytic activity;GO:0030247,polysaccharide binding;GO:0005488,binding;GO:0008201,heparin binding;GO:0008236,serine-type peptidase activity;GO:0030246,carbohydrate binding;GO:0016787,hydrolase activity;GO:0004175,endopeptidase act…
92	sp|P12830|CADH1_HUMAN	Cadherin-1 OS=Homo sapiens GN=CDH1 PE=1 SV=3	up	1.64	0.0140348	positive regulation of biological process;developmental process;multicellular organismal process;cellular process;signaling;negative regulation of biological process;metabolic process;biological regulation;death;immune system process;regulation of biological process;cellular component organization or biogenesis;establishment of localization;cell proliferation;biological adhesion;response to stimu…	extracellular region part;organelle;cell part;membrane-enclosed lumen;extracellular region;cell;macromolecular complex;organelle part	binding		Cell adhesion molecules (CAMs);Adherens junction;Melanoma;Pathogenic Escherichia coli infection;Bacterial invasion of epithelial cells;Endometrial cancer;Thyroid cancer;Pathways in cancer;Bladder cancer	GO:0034960,cellular biopolymer metabolic process;GO:0010628,positive regulation of gene expression;GO:0019941,modification-dependent protein catabolic process;GO:0045893,positive regulation of transcription, DNA-dependent;GO:0060341,regulation of cellular localization;GO:0042221,response to chemical stimulus;GO:0048731,system development;GO:0031326,regulation of cellular biosynthetic process;GO:0…	GO:0044446,intracellular organelle part;GO:0031965,nuclear membrane;GO:0031967,organelle envelope;GO:0031982,vesicle;GO:0044464,cell part;GO:0005654,nucleoplasm;GO:0005911,cell-cell junction;GO:0043232,intracellular non-membrane-bounded organelle;GO:0043231,intracellular membrane-bounded organelle;GO:0030055,cell-substrate junction;GO:0005912,adherens junction;GO:0012505,endomembrane system;GO:00…	GO:0043169,cation binding;GO:0046872,metal ion binding;GO:0001948,glycoprotein binding;GO:0005515,protein binding;GO:0050839,cell adhesion molecule binding;GO:0005488,binding;GO:0043167,ion binding;GO:0008092,cytoskeletal protein binding;GO:0008013,beta-catenin binding;GO:0005509,calcium ion binding
93	sp|P02747|C1QC_HUMAN	Complement C1q subcomponent subunit C OS=Homo sapiens GN=C1QC PE=1 SV=3	up	2.14188	0.0269642	immune system process;regulation of biological process;positive regulation of biological process;developmental process;multicellular organismal process;cellular process;response to stimulus;negative regulation of biological process;biological regulation;metabolic process	extracellular region part;extracellular region;organelle			Complement and coagulation cascades;Chagas disease;Systemic lupus erythematosus;Staphylococcus aureus infection;Prion diseases	GO:0065007,biological regulation;GO:0048583,regulation of response to stimulus;GO:0050793,regulation of developmental process;GO:0009605,response to external stimulus;GO:0006950,response to stress;GO:0044238,primary metabolic process;GO:0048584,positive regulation of response to stimulus;GO:0030852,regulation of granulocyte differentiation;GO:0002455,humoral immune response mediated by circulatin…	GO:0031982,vesicle;GO:0043226,organelle;GO:0005576,extracellular region;GO:0070062,extracellular vesicular exosome;GO:0043230,extracellular organelle;GO:0065010,extracellular membrane-bounded organelle;GO:0031988,membrane-bounded vesicle;GO:0043227,membrane-bounded organelle;GO:0044421,extracellular region part
94	sp|P02656|APOC3_HUMAN	Apolipoprotein C-III OS=Homo sapiens GN=APOC3 PE=1 SV=1	down	0.195839	0.00458355	regulation of biological process;establishment of localization;cellular component organization or biogenesis;positive regulation of biological process;multicellular organismal process;cellular process;response to stimulus;signaling;negative regulation of biological process;localization;biological regulation;metabolic process	extracellular region part;extracellular region;organelle;macromolecular complex;cell part;cell	enzyme regulator activity;binding		PPAR signaling pathway	GO:0009894,regulation of catabolic process;GO:0006641,triglyceride metabolic process;GO:0042221,response to chemical stimulus;GO:0034014,response to triglyceride;GO:0009416,response to light stimulus;GO:0031326,regulation of cellular biosynthetic process;GO:0009892,negative regulation of metabolic process;GO:0051056,regulation of small GTPase mediated signal transduction;GO:0043086,negative regul…	GO:0043229,intracellular organelle;GO:0044444,cytoplasmic part;GO:0034366,spherical high-density lipoprotein particle;GO:0005768,endosome;GO:0032994,protein-lipid complex;GO:0034361,very-low-density lipoprotein particle;GO:0031982,vesicle;GO:0070062,extracellular vesicular exosome;GO:0044464,cell part;GO:0043230,extracellular organelle;GO:0043227,membrane-bounded organelle;GO:0034385,triglyceride…	GO:0032934,sterol binding;GO:0008289,lipid binding;GO:0070653,high-density lipoprotein receptor binding;GO:0015485,cholesterol binding;GO:0005515,protein binding;GO:0005488,binding;GO:0005543,phospholipid binding;GO:0070325,lipoprotein receptor binding;GO:0005496,steroid binding;GO:0055102,lipase inhibitor activity;GO:0005102,receptor binding;GO:0030234,enzyme regulator activity;GO:0004857,enzyme…
95	sp|P01701|LV151_HUMAN	Immunoglobulin lambda variable 1-51 OS=Homo sapiens GN=IGLV1-51 PE=1 SV=2	up	1.66642	0.0268046					Primary immunodeficiency
96	sp|P01619|KV320_HUMAN	Immunoglobulin kappa variable 3-20 OS=Homo sapiens GN=IGKV3-20 PE=1 SV=2	up	12.5796	0.0171068					Primary immunodeficiency
97	sp|P0DJI8|SAA1_HUMAN	Serum amyloid A-1 protein OS=Homo sapiens GN=SAA1 PE=1 SV=1	down	0.0531609	0.00364813	immune system process;regulation of biological process;establishment of localization;cellular component organization or biogenesis;positive regulation of biological process;multicellular organismal process;cellular process;response to stimulus;biological adhesion;signaling;negative regulation of biological process;localization;locomotion;metabolic process;biological regulation	extracellular region part;organelle;cell part;membrane-enclosed lumen;extracellular region;cell;macromolecular complex;organelle part	binding;chemoattractant activity			GO:0051338,regulation of transferase activity;GO:0000187,activation of MAPK activity;GO:0016477,cell migration;GO:0050801,ion homeostasis;GO:0034960,cellular biopolymer metabolic process;GO:0031347,regulation of defense response;GO:0060326,cell chemotaxis;GO:0060341,regulation of cellular localization;GO:0042221,response to chemical stimulus;GO:0019725,cellular homeostasis;GO:0050714,positive reg…	GO:0044446,intracellular organelle part;GO:0043229,intracellular organelle;GO:0044444,cytoplasmic part;GO:0032994,protein-lipid complex;GO:0031982,vesicle;GO:0044422,organelle part;GO:0070062,extracellular vesicular exosome;GO:0044464,cell part;GO:0043230,extracellular organelle;GO:0043227,membrane-bounded organelle;GO:0043232,intracellular non-membrane-bounded organelle;GO:0044421,extracellular …	GO:0001664,G-protein-coupled receptor binding;GO:0005515,protein binding;GO:0030247,polysaccharide binding;GO:0005488,binding;GO:0008201,heparin binding;GO:0005102,receptor binding;GO:0030246,carbohydrate binding;GO:0005539,glycosaminoglycan binding;GO:0001871,pattern binding
98	sp|P00742|FA10_HUMAN	Coagulation factor X OS=Homo sapiens GN=F10 PE=1 SV=2	down	0.474726	0.00719452	regulation of biological process;establishment of localization;positive regulation of biological process;multicellular organismal process;cellular process;response to stimulus;signaling;localization;locomotion;biological regulation;metabolic process	extracellular region;organelle;cell part;cell;organelle part;membrane-enclosed lumen	binding;catalytic activity	Posttranslational modification, protein turnover, chaperones ;	Complement and coagulation cascades	GO:0065007,biological regulation;GO:0010740,positive regulation of protein kinase cascade;GO:0034960,cellular biopolymer metabolic process;GO:0010627,regulation of protein kinase cascade;GO:0009605,response to external stimulus;GO:0051897,positive regulation of protein kinase B signaling cascade;GO:0046907,intracellular transport;GO:0009967,positive regulation of signal transduction;GO:0006950,re…	GO:0044446,intracellular organelle part;GO:0044431,Golgi apparatus part;GO:0044422,organelle part;GO:0043233,organelle lumen;GO:0044464,cell part;GO:0005794,Golgi apparatus;GO:0005796,Golgi lumen;GO:0043232,intracellular non-membrane-bounded organelle;GO:0043231,intracellular membrane-bounded organelle;GO:0031974,membrane-enclosed lumen;GO:0005623,cell;GO:0044425,membrane part;GO:0005576,extracel…	GO:0043169,cation binding;GO:0008233,peptidase activity;GO:0046872,metal ion binding;GO:0070011,peptidase activity, acting on L-amino acid peptides;GO:0008289,lipid binding;GO:0017171,serine hydrolase activity;GO:0005515,protein binding;GO:0003824,catalytic activity;GO:0005488,binding;GO:0043167,ion binding;GO:0005509,calcium ion binding;GO:0005543,phospholipid binding;GO:0008236,serine-type pept…
99	sp|A0A075B6I0|LV861_HUMAN	Immunoglobulin lambda variable 8-61 OS=Homo sapiens GN=IGLV8-61 PE=3 SV=7	up	1.91622	0.00596582					Primary immunodeficiency
100	sp|P31946|1433B_HUMAN	14-3-3 protein beta/alpha OS=Homo sapiens GN=YWHAB PE=1 SV=3	down	0.522402	0.00451472	immune system process;regulation of biological process;establishment of localization;cellular component organization or biogenesis;developmental process;multicellular organismal process;cellular process;response to stimulus;signaling;viral reproduction;negative regulation of biological process;localization;locomotion;metabolic process;biological regulation	extracellular region part;organelle;cell part;membrane-enclosed lumen;extracellular region;cell;macromolecular complex;organelle part	protein binding transcription factor activity;binding	Signal transduction mechanisms ;	Cell cycle;Neurotrophin signaling pathway;Oocyte meiosis;Pathogenic Escherichia coli infection	GO:0051338,regulation of transferase activity;GO:0034960,cellular biopolymer metabolic process;GO:0010558,negative regulation of macromolecule biosynthetic process;GO:0035303,regulation of dephosphorylation;GO:0042221,response to chemical stimulus;GO:0048731,system development;GO:0031326,regulation of cellular biosynthetic process;GO:0000904,cell morphogenesis involved in differentiation;GO:00098…	GO:0044446,intracellular organelle part;GO:0031981,nuclear lumen;GO:0031982,vesicle;GO:0044422,organelle part;GO:0043233,organelle lumen;GO:0070062,extracellular vesicular exosome;GO:0044464,cell part;GO:0005654,nucleoplasm;GO:0043231,intracellular membrane-bounded organelle;GO:0005739,mitochondrion;GO:0030055,cell-substrate junction;GO:0031974,membrane-enclosed lumen;GO:0005634,nucleus;GO:000562…	GO:0016597,amino acid binding;GO:0032403,protein complex binding;GO:0005515,protein binding;GO:0019904,protein domain specific binding;GO:0051219,phosphoprotein binding;GO:0045309,protein phosphorylated amino acid binding;GO:0019899,enzyme binding;GO:0043176,amine binding;GO:0042826,histone deacetylase binding;GO:0050815,phosphoserine binding;GO:0003712,transcription cofactor activity;GO:0030528,…
101	sp|P05546|HEP2_HUMAN	Heparin cofactor 2 OS=Homo sapiens GN=SERPIND1 PE=1 SV=3	up	3.014	0.00347731	response to stimulus;regulation of biological process;locomotion;metabolic process;biological regulation;multicellular organismal process;cellular process	extracellular region part;extracellular region;organelle	enzyme regulator activity;binding	Posttranslational modification, protein turnover, chaperones ;	Complement and coagulation cascades	GO:0065007,biological regulation;GO:0009605,response to external stimulus;GO:0006950,response to stress;GO:0042221,response to chemical stimulus;GO:0052548,regulation of endopeptidase activity;GO:0065009,regulation of molecular function;GO:0043086,negative regulation of catalytic activity;GO:0009611,response to wounding;GO:0007596,blood coagulation;GO:0044092,negative regulation of molecular func…	GO:0005615,extracellular space;GO:0031982,vesicle;GO:0043226,organelle;GO:0005576,extracellular region;GO:0070062,extracellular vesicular exosome;GO:0043230,extracellular organelle;GO:0065010,extracellular membrane-bounded organelle;GO:0043227,membrane-bounded organelle;GO:0031988,membrane-bounded vesicle;GO:0044421,extracellular region part	GO:0030247,polysaccharide binding;GO:0005488,binding;GO:0004867,serine-type endopeptidase inhibitor activity;GO:0008201,heparin binding;GO:0004866,endopeptidase inhibitor activity;GO:0030414,peptidase inhibitor activity;GO:0030234,enzyme regulator activity;GO:0004857,enzyme inhibitor activity;GO:0030246,carbohydrate binding;GO:0005539,glycosaminoglycan binding;GO:0001871,pattern binding
102	sp|P18065|IBP2_HUMAN	Insulin-like growth factor-binding protein 2 OS=Homo sapiens GN=IGFBP2 PE=1 SV=2	up	3.17335	0.0297782	reproductive process;reproduction;immune system process;regulation of biological process;multi-organism process;cellular component organization or biogenesis;positive regulation of biological process;developmental process;multicellular organismal process;cellular process;cell proliferation;response to stimulus;growth;signaling;negative regulation of biological process;biological regulation;metabo…	extracellular region part;extracellular region;organelle;cell part;cell	binding		p53 signaling pathway	GO:0065007,biological regulation;GO:0031667,response to nutrient levels;GO:0034960,cellular biopolymer metabolic process;GO:0051251,positive regulation of lymphocyte activation;GO:0009605,response to external stimulus;GO:0042221,response to chemical stimulus;GO:0002694,regulation of leukocyte activation;GO:0033273,response to vitamin;GO:0009719,response to endogenous stimulus;GO:0051384,response …	GO:0043229,intracellular organelle;GO:0044444,cytoplasmic part;GO:0031982,vesicle;GO:0070062,extracellular vesicular exosome;GO:0045177,apical part of cell;GO:0044464,cell part;GO:0043230,extracellular organelle;GO:0043227,membrane-bounded organelle;GO:0044421,extracellular region part;GO:0005615,extracellular space;GO:0044424,intracellular part;GO:0005737,cytoplasm;GO:0031410,cytoplasmic vesicle…	GO:0005515,protein binding;GO:0005102,receptor binding;GO:0005488,binding;GO:0019838,growth factor binding
103	sp|P00747|PLMN_HUMAN	Plasminogen OS=Homo sapiens GN=PLG PE=1 SV=2	up	2.46461	0.0177054	positive regulation of biological process;developmental process;multicellular organismal process;cellular process;growth;negative regulation of biological process;metabolic process;biological regulation;immune system process;regulation of biological process;cellular component organization or biogenesis;establishment of localization;cell proliferation;biological adhesion;response to stimulus;local…	extracellular region part;extracellular region;organelle;cell part;cell;organelle part;membrane-enclosed lumen	binding;catalytic activity	Posttranslational modification, protein turnover, chaperones ;	Complement and coagulation cascades;Staphylococcus aureus infection;Neuroactive ligand-receptor interaction	GO:0065007,biological regulation;GO:0034960,cellular biopolymer metabolic process;GO:0007517,muscle organ development;GO:0050793,regulation of developmental process;GO:0009605,response to external stimulus;GO:0051919,positive regulation of fibrinolysis;GO:0006950,response to stress;GO:0048731,system development;GO:0002576,platelet degranulation;GO:0042246,tissue regeneration;GO:0032940,secretion …	GO:0044446,intracellular organelle part;GO:0031982,vesicle;GO:0044422,organelle part;GO:0043233,organelle lumen;GO:0070062,extracellular vesicular exosome;GO:0044464,cell part;GO:0031232,extrinsic to external side of plasma membrane;GO:0043231,intracellular membrane-bounded organelle;GO:0031974,membrane-enclosed lumen;GO:0005623,cell;GO:0030141,secretory granule;GO:0044425,membrane part;GO:000557…	GO:0008233,peptidase activity;GO:0070011,peptidase activity, acting on L-amino acid peptides;GO:0034185,apolipoprotein binding;GO:0017171,serine hydrolase activity;GO:0005515,protein binding;GO:0003824,catalytic activity;GO:0019904,protein domain specific binding;GO:0005488,binding;GO:0008236,serine-type peptidase activity;GO:0005102,receptor binding;GO:0016787,hydrolase activity;GO:0004252,serin…
104	sp|Q15848|ADIPO_HUMAN	Adiponectin OS=Homo sapiens GN=ADIPOQ PE=1 SV=1	up	5.25336	0.00599681	positive regulation of biological process;developmental process;multicellular organismal process;cellular process;signaling;negative regulation of biological process;metabolic process;biological regulation;death;immune system process;regulation of biological process;cellular component organization or biogenesis;establishment of localization;rhythmic process;cell proliferation;biological adhesion;…	extracellular region part;extracellular region;organelle;cell part;cell	binding		Adipocytokine signaling pathway;PPAR signaling pathway;Type II diabetes mellitus	GO:0051338,regulation of transferase activity;GO:0010740,positive regulation of protein kinase cascade;GO:0050801,ion homeostasis;GO:0016054,organic acid catabolic process;GO:0032720,negative regulation of tumor necrosis factor production;GO:0031347,regulation of defense response;GO:0010558,negative regulation of macromolecule biosynthetic process;GO:0060341,regulation of cellular localization;GO…	GO:0043229,intracellular organelle;GO:0044444,cytoplasmic part;GO:0005783,endoplasmic reticulum;GO:0031982,vesicle;GO:0048471,perinuclear region of cytoplasm;GO:0070062,extracellular vesicular exosome;GO:0005581,collagen;GO:0044464,cell part;GO:0043230,extracellular organelle;GO:0044420,extracellular matrix part;GO:0043227,membrane-bounded organelle;GO:0044421,extracellular region part;GO:0043231…	GO:0048029,monosaccharide binding;GO:0042803,protein homodimerization activity;GO:0042802,identical protein binding;GO:0005515,protein binding;GO:0005529,sugar binding;GO:0005179,hormone activity;GO:0005488,binding;GO:0046983,protein dimerization activity;GO:0005102,receptor binding;GO:0030246,carbohydrate binding;GO:0033691,sialic acid binding
105	sp|O95445|APOM_HUMAN	Apolipoprotein M OS=Homo sapiens GN=APOM PE=1 SV=2	up	1.53841	0.00506339	reproductive process;reproduction;immune system process;regulation of biological process;establishment of localization;cellular component organization or biogenesis;positive regulation of biological process;developmental process;multicellular organismal process;cellular process;response to stimulus;growth;signaling;negative regulation of biological process;localization;biological regulation;metab…	extracellular region part;organelle;cell part;membrane-enclosed lumen;extracellular region;cell;macromolecular complex;organelle part	molecular transducer activity;transporter activity;binding;catalytic activity;antioxidant activity			GO:0034960,cellular biopolymer metabolic process;GO:0050748,negative regulation of lipoprotein metabolic process;GO:0042221,response to chemical stimulus;GO:0009416,response to light stimulus;GO:0031326,regulation of cellular biosynthetic process;GO:0002252,immune effector process;GO:0000279,M phase;GO:0009892,negative regulation of metabolic process;GO:0043283,biopolymer metabolic process;GO:000…	GO:0044446,intracellular organelle part;GO:0030529,ribonucleoprotein complex;GO:0034366,spherical high-density lipoprotein particle;GO:0032994,protein-lipid complex;GO:0031981,nuclear lumen;GO:0031982,vesicle;GO:0005764,lysosome;GO:0044422,organelle part;GO:0043233,organelle lumen;GO:0070062,extracellular vesicular exosome;GO:0044464,cell part;GO:0005654,nucleoplasm;GO:0043232,intracellular non-m…	GO:0043169,cation binding;GO:0016773,phosphotransferase activity, alcohol group as acceptor;GO:0008289,lipid binding;GO:0019199,transmembrane receptor protein kinase activity;GO:0046914,transition metal ion binding;GO:0016209,antioxidant activity;GO:0060089,molecular transducer activity;GO:0005543,phospholipid binding;GO:0000166,nucleotide binding;GO:0070011,peptidase activity, acting on L-amino …
106	sp|P05452|TETN_HUMAN	Tetranectin OS=Homo sapiens GN=CLEC3B PE=1 SV=3	up	1.59672	0.0339253	response to stimulus;regulation of biological process;positive regulation of biological process;developmental process;metabolic process;biological regulation;multicellular organismal process;cellular process	extracellular region part;extracellular region;organelle;cell part;cell;organelle part;membrane-enclosed lumen	binding		Phagosome;RNA degradation	GO:0065007,biological regulation;GO:0060255,regulation of macromolecule metabolic process;GO:0048731,system development;GO:0009888,tissue development;GO:0060348,bone development;GO:0032270,positive regulation of cellular protein metabolic process;GO:0048522,positive regulation of cellular process;GO:0031323,regulation of cellular metabolic process;GO:0001503,ossification;GO:0048518,positive regul…	GO:0044446,intracellular organelle part;GO:0043229,intracellular organelle;GO:0005730,nucleolus;GO:0031981,nuclear lumen;GO:0031982,vesicle;GO:0044422,organelle part;GO:0043233,organelle lumen;GO:0070062,extracellular vesicular exosome;GO:0044464,cell part;GO:0043230,extracellular organelle;GO:0043227,membrane-bounded organelle;GO:0043232,intracellular non-membrane-bounded organelle;GO:0044421,ex…	GO:0043169,cation binding;GO:0046872,metal ion binding;GO:0030247,polysaccharide binding;GO:0005488,binding;GO:0043167,ion binding;GO:0005509,calcium ion binding;GO:0008201,heparin binding;GO:0030246,carbohydrate binding;GO:0005539,glycosaminoglycan binding;GO:0001871,pattern binding
107	sp|Q14624|ITIH4_HUMAN	Inter-alpha-trypsin inhibitor heavy chain H4 OS=Homo sapiens GN=ITIH4 PE=1 SV=4	up	4.04292	3.38e-05	response to stimulus;regulation of biological process;metabolic process;biological regulation	extracellular region part;extracellular region;organelle;cell part;cell	enzyme regulator activity;binding	General function prediction only ;	Arrhythmogenic right ventricular cardiomyopathy (ARVC);MAPK signaling pathway;Dilated cardiomyopathy;Hypertrophic cardiomyopathy (HCM);Cardiac muscle contraction	GO:0065007,biological regulation;GO:0009605,response to external stimulus;GO:0034097,response to cytokine stimulus;GO:0006950,response to stress;GO:0042221,response to chemical stimulus;GO:0044238,primary metabolic process;GO:0052548,regulation of endopeptidase activity;GO:0030203,glycosaminoglycan metabolic process;GO:0043283,biopolymer metabolic process;GO:0065009,regulation of molecular functi…	GO:0044424,intracellular part;GO:0005737,cytoplasm;GO:0005623,cell;GO:0031982,vesicle;GO:0043226,organelle;GO:0005622,intracellular;GO:0005886,plasma membrane;GO:0005576,extracellular region;GO:0070062,extracellular vesicular exosome;GO:0044464,cell part;GO:0043230,extracellular organelle;GO:0065010,extracellular membrane-bounded organelle;GO:0031988,membrane-bounded vesicle;GO:0043227,membrane-b…	GO:0004867,serine-type endopeptidase inhibitor activity;GO:0005515,protein binding;GO:0030234,enzyme regulator activity;GO:0030414,peptidase inhibitor activity;GO:0004866,endopeptidase inhibitor activity;GO:0004857,enzyme inhibitor activity;GO:0005488,binding
108	sp|Q13103|SPP24_HUMAN	Secreted phosphoprotein 24 OS=Homo sapiens GN=SPP2 PE=1 SV=1	up	1.84515	0.0294413	regulation of biological process;cellular component organization or biogenesis;developmental process;metabolic process;biological regulation;multicellular organismal process	extracellular region part;extracellular region;organelle;macromolecular complex	enzyme regulator activity			GO:0065007,biological regulation;GO:0010926,anatomical structure formation;GO:0032502,developmental process;GO:0070271,protein complex biogenesis;GO:0050790,regulation of catalytic activity;GO:0001501,skeletal system development;GO:0048731,system development;GO:0010466,negative regulation of peptidase activity;GO:0052548,regulation of endopeptidase activity;GO:0032501,multicellular organismal pro…	GO:0043234,protein complex;GO:0032991,macromolecular complex;GO:0031982,vesicle;GO:0043226,organelle;GO:0005576,extracellular region;GO:0070062,extracellular vesicular exosome;GO:0043230,extracellular organelle;GO:0065010,extracellular membrane-bounded organelle;GO:0031988,membrane-bounded vesicle;GO:0043227,membrane-bounded organelle;GO:0044421,extracellular region part	GO:0030234,enzyme regulator activity;GO:0030414,peptidase inhibitor activity;GO:0004866,endopeptidase inhibitor activity;GO:0004857,enzyme inhibitor activity
109	sp|P36955|PEDF_HUMAN	Pigment epithelium-derived factor OS=Homo sapiens GN=SERPINF1 PE=1 SV=4	up	2.00652	0.00520617	reproduction;positive regulation of biological process;developmental process;multicellular organismal process;cellular process;negative regulation of biological process;biological regulation;metabolic process;reproductive process;regulation of biological process;cellular component organization or biogenesis;rhythmic process;cell proliferation;response to stimulus;locomotion;localization	extracellular region part;extracellular region;organelle;cell part;cell	enzyme regulator activity;binding	Posttranslational modification, protein turnover, chaperones ;	Complement and coagulation cascades	GO:0065007,biological regulation;GO:0050793,regulation of developmental process;GO:0031347,regulation of defense response;GO:0042221,response to chemical stimulus;GO:0048731,system development;GO:0052548,regulation of endopeptidase activity;GO:0051239,regulation of multicellular organismal process;GO:0009892,negative regulation of metabolic process;GO:0050678,regulation of epithelial cell prolife…	GO:0043229,intracellular organelle;GO:0044444,cytoplasmic part;GO:0031982,vesicle;GO:0048770,pigment granule;GO:0048471,perinuclear region of cytoplasm;GO:0070062,extracellular vesicular exosome;GO:0044464,cell part;GO:0043230,extracellular organelle;GO:0044420,extracellular matrix part;GO:0043227,membrane-bounded organelle;GO:0044421,extracellular region part;GO:0043231,intracellular membrane-bo…	GO:0004867,serine-type endopeptidase inhibitor activity;GO:0005515,protein binding;GO:0030234,enzyme regulator activity;GO:0030414,peptidase inhibitor activity;GO:0004866,endopeptidase inhibitor activity;GO:0004857,enzyme inhibitor activity;GO:0005488,binding
110	sp|P48059|LIMS1_HUMAN	LIM and senescent cell antigen-like-containing domain protein 1 OS=Homo sapiens GN=LIMS1 PE=1 SV=4	down	0.489098	0.00608039	regulation of biological process;establishment of localization;cellular component organization or biogenesis;positive regulation of biological process;developmental process;multicellular organismal process;cellular process;cell proliferation;response to stimulus;biological adhesion;negative regulation of biological process;localization;metabolic process;biological regulation;death	macromolecular complex;cell part;cell	binding		VEGF signaling pathway;Regulation of actin cytoskeleton;Leukocyte transendothelial migration;Chemokine signaling pathway;Bacterial invasion of epithelial cells;Focal adhesion	GO:0065007,biological regulation;GO:0050793,regulation of developmental process;GO:0010628,positive regulation of gene expression;GO:0010558,negative regulation of macromolecule biosynthetic process;GO:0000902,cell morphogenesis;GO:0048731,system development;GO:0031326,regulation of cellular biosynthetic process;GO:0009888,tissue development;GO:0031324,negative regulation of cellular metabolic pr…	GO:0044444,cytoplasmic part;GO:0048471,perinuclear region of cytoplasm;GO:0044464,cell part;GO:0005924,cell-substrate adherens junction;GO:0070161,anchoring junction;GO:0005911,cell-cell junction;GO:0044424,intracellular part;GO:0043234,protein complex;GO:0005925,focal adhesion;GO:0030055,cell-substrate junction;GO:0005737,cytoplasm;GO:0032991,macromolecular complex;GO:0016323,basolateral plasma …	GO:0043169,cation binding;GO:0019901,protein kinase binding;GO:0046872,metal ion binding;GO:0005515,protein binding;GO:0019904,protein domain specific binding;GO:0005488,binding;GO:0046914,transition metal ion binding;GO:0043167,ion binding;GO:0008270,zinc ion binding;GO:0019899,enzyme binding;GO:0019900,kinase binding

## Sheet: 115vs113
N	Accession	Name	Diff_state	115:113	PVal 115:113	GO_function(Biological_Process)	GO_function(Cellular_Component)	GO_function(Molecular_Function)	COG_function	Kegg_function	GO_enrichment(Biological_Process)	GO_enrichment(Cellular_Component)	GO_enrichment(Molecular_Function)	Kegg_enrichment
1	sp|P18428|LBP_HUMAN	Lipopolysaccharide-binding protein OS=Homo sapiens GN=LBP PE=1 SV=3	down	0.456979	0.0117609	immune system process;regulation of biological process;multi-organism process;establishment of localization;cellular component organization or biogenesis;positive regulation of biological process;developmental process;multicellular organismal process;cellular process;response to stimulus;growth;signaling;negative regulation of biological process;localization;locomotion;metabolic process;biologica…	extracellular region part;extracellular region;organelle;cell part;cell	binding		Toll-like receptor signaling pathway	GO:0002673,regulation of acute inflammatory response;GO:0016477,cell migration;GO:0031349,positive regulation of defense response;GO:0032720,negative regulation of tumor necrosis factor production;GO:0031347,regulation of defense response;GO:0060326,cell chemotaxis;GO:0042221,response to chemical stimulus;GO:0002694,regulation of leukocyte activation;GO:0045321,leukocyte activation;GO:0048731,sys…	GO:0005615,extracellular space;GO:0005623,cell;GO:0031982,vesicle;GO:0043226,organelle;GO:0009986,cell surface;GO:0005576,extracellular region;GO:0070062,extracellular vesicular exosome;GO:0044464,cell part;GO:0043230,extracellular organelle;GO:0065010,extracellular membrane-bounded organelle;GO:0031988,membrane-bounded vesicle;GO:0043227,membrane-bounded organelle;GO:0016020,membrane;GO:0044421,…	GO:0005515,protein binding;GO:0005102,receptor binding;GO:0005488,binding
2	sp|Q15113|PCOC1_HUMAN	Procollagen C-endopeptidase enhancer 1 OS=Homo sapiens GN=PCOLCE PE=1 SV=2	down	0.618449	0.0486394	regulation of biological process;developmental process;metabolic process;biological regulation;multicellular organismal process	extracellular region part;extracellular region;organelle	enzyme regulator activity;binding			GO:0065007,biological regulation;GO:0032502,developmental process;GO:0050790,regulation of catalytic activity;GO:0051345,positive regulation of hydrolase activity;GO:0043085,positive regulation of catalytic activity;GO:0010952,positive regulation of peptidase activity;GO:0032501,multicellular organismal process;GO:0052547,regulation of peptidase activity;GO:0044093,positive regulation of molecula…	GO:0005615,extracellular space;GO:0005578,proteinaceous extracellular matrix;GO:0031982,vesicle;GO:0043226,organelle;GO:0031012,extracellular matrix;GO:0005576,extracellular region;GO:0070062,extracellular vesicular exosome;GO:0005581,collagen;GO:0043230,extracellular organelle;GO:0065010,extracellular membrane-bounded organelle;GO:0043227,membrane-bounded organelle;GO:0044420,extracellular matri…	GO:0005515,protein binding;GO:0016504,peptidase activator activity;GO:0030247,polysaccharide binding;GO:0005488,binding;GO:0008201,heparin binding;GO:0008047,enzyme activator activity;GO:0005518,collagen binding;GO:0030234,enzyme regulator activity;GO:0030246,carbohydrate binding;GO:0005539,glycosaminoglycan binding;GO:0001871,pattern binding
3	sp|P34096|RNAS4_HUMAN	Ribonuclease 4 OS=Homo sapiens GN=RNASE4 PE=1 SV=3	down	0.499169	0.0197465	metabolic process;cellular process	extracellular region part;extracellular region;organelle	binding;catalytic activity			GO:0016071,mRNA metabolic process;GO:0043170,macromolecule metabolic process;GO:0044260,cellular macromolecule metabolic process;GO:0034960,cellular biopolymer metabolic process;GO:0006397,mRNA processing;GO:0006396,RNA processing;GO:0009987,cellular process;GO:0044238,primary metabolic process;GO:0006139,nucleobase, nucleoside, nucleotide and nucleic acid metabolic process;GO:0044237,cellular me…	GO:0031982,vesicle;GO:0043226,organelle;GO:0005576,extracellular region;GO:0070062,extracellular vesicular exosome;GO:0043230,extracellular organelle;GO:0065010,extracellular membrane-bounded organelle;GO:0031988,membrane-bounded vesicle;GO:0043227,membrane-bounded organelle;GO:0044421,extracellular region part	GO:0003676,nucleic acid binding;GO:0003824,catalytic activity;GO:0016787,hydrolase activity;GO:0005488,binding;GO:0016788,hydrolase activity, acting on ester bonds
4	sp|P04070|PROC_HUMAN	Vitamin K-dependent protein C OS=Homo sapiens GN=PROC PE=1 SV=1	up	1.88261	0.0193525	immune system process;regulation of biological process;establishment of localization;multicellular organismal process;cellular process;response to stimulus;negative regulation of biological process;localization;locomotion;biological regulation;metabolic process;death	extracellular region part;extracellular region;organelle;cell part;cell;organelle part;membrane-enclosed lumen	binding;catalytic activity	Posttranslational modification, protein turnover, chaperones ;	Complement and coagulation cascades	GO:0065007,biological regulation;GO:0016477,cell migration;GO:0034960,cellular biopolymer metabolic process;GO:0050793,regulation of developmental process;GO:0048870,cell motility;GO:0031347,regulation of defense response;GO:0051239,regulation of multicellular organismal process;GO:0043283,biopolymer metabolic process;GO:0043069,negative regulation of programmed cell death;GO:0060548,negative reg…	GO:0043229,intracellular organelle;GO:0044446,intracellular organelle part;GO:0044444,cytoplasmic part;GO:0005783,endoplasmic reticulum;GO:0044431,Golgi apparatus part;GO:0044422,organelle part;GO:0043233,organelle lumen;GO:0005788,endoplasmic reticulum lumen;GO:0044464,cell part;GO:0005794,Golgi apparatus;GO:0043227,membrane-bounded organelle;GO:0005796,Golgi lumen;GO:0044421,extracellular regio…	GO:0043169,cation binding;GO:0008233,peptidase activity;GO:0046872,metal ion binding;GO:0070011,peptidase activity, acting on L-amino acid peptides;GO:0017171,serine hydrolase activity;GO:0005515,protein binding;GO:0003824,catalytic activity;GO:0005488,binding;GO:0043167,ion binding;GO:0005509,calcium ion binding;GO:0008236,serine-type peptidase activity;GO:0016787,hydrolase activity;GO:0004252,s…
5	sp|P02741|CRP_HUMAN	C-reactive protein OS=Homo sapiens GN=CRP PE=1 SV=1	down	0.389448	0.01107	immune system process;regulation of biological process;multi-organism process;establishment of localization;cellular component organization or biogenesis;positive regulation of biological process;developmental process;multicellular organismal process;cellular process;cell proliferation;response to stimulus;negative regulation of biological process;localization;biological regulation;metabolic proc…	extracellular region part;extracellular region;organelle;cell part;cell	binding		Pancreatic secretion;Proximal tubule bicarbonate reclamation;Gastric acid secretion;Collecting duct acid secretion;Nitrogen metabolism	GO:0065007,biological regulation;GO:0050793,regulation of developmental process;GO:0010628,positive regulation of gene expression;GO:0009617,response to bacterium;GO:0009605,response to external stimulus;GO:0048534,hemopoietic or lymphoid organ development;GO:0006950,response to stress;GO:0048731,system development;GO:0048584,positive regulation of response to stimulus;GO:0031326,regulation of ce…	GO:0044444,cytoplasmic part;GO:0005938,cell cortex;GO:0031982,vesicle;GO:0042995,cell projection;GO:0043005,neuron projection;GO:0070062,extracellular vesicular exosome;GO:0044464,cell part;GO:0043230,extracellular organelle;GO:0043227,membrane-bounded organelle;GO:0044421,extracellular region part;GO:0005615,extracellular space;GO:0044424,intracellular part;GO:0005737,cytoplasm;GO:0005623,cell;G…	GO:0043169,cation binding;GO:0008034,lipoprotein binding;GO:0042803,protein homodimerization activity;GO:0008289,lipid binding;GO:0005515,protein binding;GO:0046914,transition metal ion binding;GO:0043167,ion binding;GO:0050997,quaternary ammonium group binding;GO:0043178,alcohol binding;GO:0001848,complement binding;GO:0043176,amine binding;GO:0030169,low-density lipoprotein binding;GO:0046872,m…
6	sp|P35579|MYH9_HUMAN	Myosin-9 OS=Homo sapiens GN=MYH9 PE=1 SV=4	up	3.93866	0.00676073	immune system process;regulation of biological process;establishment of localization;cellular component organization or biogenesis;developmental process;multicellular organismal process;cellular process;response to stimulus;biological adhesion;signaling;negative regulation of biological process;localization;locomotion;metabolic process;biological regulation	extracellular region part;organelle;cell part;extracellular region;synapse;cell;macromolecular complex;organelle part	transporter activity;binding;catalytic activity	Cytoskeleton ;	Vascular smooth muscle contraction;Regulation of actin cytoskeleton;Viral myocarditis;Dilated cardiomyopathy;Tight junction;Hypertrophic cardiomyopathy (HCM);Cardiac muscle contraction	GO:0016477,cell migration;GO:0007517,muscle organ development;GO:0048747,muscle fiber development;GO:0022604,regulation of cell morphogenesis;GO:0045321,leukocyte activation;GO:0048731,system development;GO:0030097,hemopoiesis;GO:0000279,M phase;GO:0000904,cell morphogenesis involved in differentiation;GO:0009892,negative regulation of metabolic process;GO:0043283,biopolymer metabolic process;GO:…	GO:0044446,intracellular organelle part;GO:0001725,stress fiber;GO:0005938,cell cortex;GO:0031982,vesicle;GO:0001726,ruffle;GO:0044422,organelle part;GO:0070062,extracellular vesicular exosome;GO:0044464,cell part;GO:0005911,cell-cell junction;GO:0043232,intracellular non-membrane-bounded organelle;GO:0043231,intracellular membrane-bounded organelle;GO:0016459,myosin complex;GO:0030055,cell-subst…	GO:0001883,purine nucleoside binding;GO:0017111,nucleoside-triphosphatase activity;GO:0005515,protein binding;GO:0000146,microfilament motor activity;GO:0003774,motor activity;GO:0022857,transmembrane transporter activity;GO:0051015,actin filament binding;GO:0016817,hydrolase activity, acting on acid anhydrides;GO:0000166,nucleotide binding;GO:0042802,identical protein binding;GO:0043495,protein …
7	sp|P02748|CO9_HUMAN	Complement component C9 OS=Homo sapiens GN=C9 PE=1 SV=2	down	0.106654	0.000296339	immune system process;regulation of biological process;multi-organism process;positive regulation of biological process;multicellular organismal process;cell killing;response to stimulus;biological regulation;metabolic process	extracellular region part;extracellular region;organelle;macromolecular complex;cell part;cell			Complement and coagulation cascades;Systemic lupus erythematosus;Prion diseases;Amoebiasis	GO:0009894,regulation of catabolic process;GO:0002673,regulation of acute inflammatory response;GO:0065007,biological regulation;GO:0009605,response to external stimulus;GO:0031347,regulation of defense response;GO:0006950,response to stress;GO:0048584,positive regulation of response to stimulus;GO:0002252,immune effector process;GO:0030449,regulation of complement activation;GO:0043283,biopolyme…	GO:0031982,vesicle;GO:0070062,extracellular vesicular exosome;GO:0044464,cell part;GO:0043230,extracellular organelle;GO:0016021,integral to membrane;GO:0043227,membrane-bounded organelle;GO:0044421,extracellular region part;GO:0044424,intracellular part;GO:0043234,protein complex;GO:0005737,cytoplasm;GO:0005623,cell;GO:0032991,macromolecular complex;GO:0044425,membrane part;GO:0005579,membrane a…
8	sp|P02766|TTHY_HUMAN	Transthyretin OS=Homo sapiens GN=TTR PE=1 SV=1	down	0.528776	0.0206717	regulation of biological process;establishment of localization;cellular component organization or biogenesis;cellular process;response to stimulus;signaling;localization;biological regulation;metabolic process	extracellular region part;extracellular region;organelle;macromolecular complex;cell part;cell	binding	General function prediction only ;	Metabolic pathways;Microbial metabolism in diverse environments;Purine metabolism	GO:0050877,neurological system process;GO:0016101,diterpenoid metabolic process;GO:0065007,biological regulation;GO:0009584,detection of visible light;GO:0034960,cellular biopolymer metabolic process;GO:0015837,amine transport;GO:0009605,response to external stimulus;GO:0007600,sensory perception;GO:0009416,response to light stimulus;GO:0009583,detection of light stimulus;GO:0044238,primary metab…	GO:0005615,extracellular space;GO:0044424,intracellular part;GO:0043234,protein complex;GO:0005737,cytoplasm;GO:0005623,cell;GO:0032991,macromolecular complex;GO:0031982,vesicle;GO:0043226,organelle;GO:0005622,intracellular;GO:0005576,extracellular region;GO:0070062,extracellular vesicular exosome;GO:0044464,cell part;GO:0043230,extracellular organelle;GO:0065010,extracellular membrane-bounded or…	GO:0042802,identical protein binding;GO:0005515,protein binding;GO:0005102,receptor binding;GO:0046982,protein heterodimerization activity;GO:0005179,hormone activity;GO:0005488,binding;GO:0046983,protein dimerization activity
9	sp|P27918|PROP_HUMAN	Properdin OS=Homo sapiens GN=CFP PE=1 SV=2	down	0.47382	0.0210703	immune system process;regulation of biological process;multi-organism process;positive regulation of biological process;cellular process;response to stimulus;biological regulation;metabolic process	extracellular region part;extracellular region;organelle;cell part;cell;organelle part;membrane-enclosed lumen			Axon guidance	GO:0009894,regulation of catabolic process;GO:0002673,regulation of acute inflammatory response;GO:0065007,biological regulation;GO:0034960,cellular biopolymer metabolic process;GO:0009617,response to bacterium;GO:0009605,response to external stimulus;GO:0031347,regulation of defense response;GO:0006950,response to stress;GO:0048584,positive regulation of response to stimulus;GO:0009607,response …	GO:0043229,intracellular organelle;GO:0044446,intracellular organelle part;GO:0044444,cytoplasmic part;GO:0005783,endoplasmic reticulum;GO:0044422,organelle part;GO:0043233,organelle lumen;GO:0005788,endoplasmic reticulum lumen;GO:0044464,cell part;GO:0043227,membrane-bounded organelle;GO:0044421,extracellular region part;GO:0005615,extracellular space;GO:0043231,intracellular membrane-bounded or…
10	sp|P02776|PLF4_HUMAN	Platelet factor 4 OS=Homo sapiens GN=PF4 PE=1 SV=2	up	5.37308	0.000182647	immune system process;regulation of biological process;multi-organism process;establishment of localization;positive regulation of biological process;developmental process;multicellular organismal process;cellular process;cell proliferation;response to stimulus;signaling;negative regulation of biological process;localization;locomotion;metabolic process;biological regulation;death	extracellular region part;extracellular region;organelle;cell part;cell;organelle part;membrane-enclosed lumen	binding		Chemokine signaling pathway;Cytokine-cytokine receptor interaction	GO:0010628,positive regulation of gene expression;GO:0045893,positive regulation of transcription, DNA-dependent;GO:0010558,negative regulation of macromolecule biosynthetic process;GO:0042221,response to chemical stimulus;GO:0002576,platelet degranulation;GO:0031326,regulation of cellular biosynthetic process;GO:0019221,cytokine-mediated signaling pathway;GO:0032940,secretion by cell;GO:0051239,…	GO:0043229,intracellular organelle;GO:0044446,intracellular organelle part;GO:0044444,cytoplasmic part;GO:0031091,platelet alpha granule;GO:0031982,vesicle;GO:0044422,organelle part;GO:0043233,organelle lumen;GO:0044433,cytoplasmic vesicle part;GO:0044464,cell part;GO:0060205,cytoplasmic membrane-bounded vesicle lumen;GO:0043227,membrane-bounded organelle;GO:0044421,extracellular region part;GO:0…	GO:0005515,protein binding;GO:0001664,G-protein-coupled receptor binding;GO:0005125,cytokine activity;GO:0030247,polysaccharide binding;GO:0005488,binding;GO:0008009,chemokine activity;GO:0045236,CXCR chemokine receptor binding;GO:0008201,heparin binding;GO:0005102,receptor binding;GO:0042379,chemokine receptor binding;GO:0030246,carbohydrate binding;GO:0001871,pattern binding;GO:0005539,glycosam…
11	sp|P08567|PLEK_HUMAN	Pleckstrin OS=Homo sapiens GN=PLEK PE=1 SV=3	up	2.77159	0.0135659	immune system process;regulation of biological process;establishment of localization;cellular component organization or biogenesis;positive regulation of biological process;developmental process;multicellular organismal process;cellular process;response to stimulus;biological adhesion;signaling;negative regulation of biological process;localization;biological regulation;metabolic process	extracellular region;cell part;cell	binding		Adherens junction	GO:0035303,regulation of dephosphorylation;GO:0048731,system development;GO:0002576,platelet degranulation;GO:0031326,regulation of cellular biosynthetic process;GO:0032940,secretion by cell;GO:0030097,hemopoiesis;GO:0051239,regulation of multicellular organismal process;GO:0009892,negative regulation of metabolic process;GO:0043086,negative regulation of catalytic activity;GO:0019220,regulation …	GO:0044444,cytoplasmic part;GO:0031256,leading edge membrane;GO:0042995,cell projection;GO:0001726,ruffle;GO:0044464,cell part;GO:0044463,cell projection part;GO:0044424,intracellular part;GO:0032587,ruffle membrane;GO:0005737,cytoplasm;GO:0031253,cell projection membrane;GO:0005623,cell;GO:0005829,cytosol;GO:0044425,membrane part;GO:0031252,cell leading edge;GO:0005886,plasma membrane;GO:0005622…	GO:0019901,protein kinase binding;GO:0042803,protein homodimerization activity;GO:0008289,lipid binding;GO:0042802,identical protein binding;GO:0005515,protein binding;GO:0005488,binding;GO:0046983,protein dimerization activity;GO:0005543,phospholipid binding;GO:0019899,enzyme binding;GO:0019900,kinase binding;GO:0005080,protein kinase C binding
12	sp|P08254|MMP3_HUMAN	Stromelysin-1 OS=Homo sapiens GN=MMP3 PE=1 SV=2	up	1.80103	0.0440161	regulation of biological process;cellular component organization or biogenesis;positive regulation of biological process;multicellular organismal process;cellular process;response to stimulus;signaling;negative regulation of biological process;localization;locomotion;biological regulation;metabolic process	extracellular region part;extracellular region;organelle;macromolecular complex;cell part;cell	binding;catalytic activity			GO:0065007,biological regulation;GO:0010627,regulation of protein kinase cascade;GO:0032459,regulation of protein oligomerization;GO:0044238,primary metabolic process;GO:0031324,negative regulation of cellular metabolic process;GO:0043062,extracellular structure organization;GO:0030574,collagen catabolic process;GO:0009892,negative regulation of metabolic process;GO:0043283,biopolymer metabolic p…	GO:0043229,intracellular organelle;GO:0044444,cytoplasmic part;GO:0042995,cell projection;GO:0043005,neuron projection;GO:0044464,cell part;GO:0043227,membrane-bounded organelle;GO:0044421,extracellular region part;GO:0043231,intracellular membrane-bounded organelle;GO:0005615,extracellular space;GO:0044424,intracellular part;GO:0043234,protein complex;GO:0005739,mitochondrion;GO:0005737,cytoplas…	GO:0043169,cation binding;GO:0008233,peptidase activity;GO:0046872,metal ion binding;GO:0070011,peptidase activity, acting on L-amino acid peptides;GO:0032403,protein complex binding;GO:0005515,protein binding;GO:0003824,catalytic activity;GO:0005488,binding;GO:0046914,transition metal ion binding;GO:0043167,ion binding;GO:0008237,metallopeptidase activity;GO:0008270,zinc ion binding;GO:0005509,c…
13	sp|P17936|IBP3_HUMAN	Insulin-like growth factor-binding protein 3 OS=Homo sapiens GN=IGFBP3 PE=1 SV=2	down	0.275557	0.0448098	regulation of biological process;cellular component organization or biogenesis;positive regulation of biological process;developmental process;multicellular organismal process;cellular process;cell proliferation;response to stimulus;growth;signaling;negative regulation of biological process;localization;locomotion;metabolic process;biological regulation;death	extracellular region part;organelle;cell part;membrane-enclosed lumen;extracellular region;cell;macromolecular complex;organelle part	enzyme regulator activity;binding		p53 signaling pathway	GO:0065007,biological regulation;GO:0010740,positive regulation of protein kinase cascade;GO:0050793,regulation of developmental process;GO:0042221,response to chemical stimulus;GO:0001649,osteoblast differentiation;GO:0048731,system development;GO:0009719,response to endogenous stimulus;GO:0048742,regulation of skeletal muscle fiber development;GO:0031324,negative regulation of cellular metaboli…	GO:0043229,intracellular organelle;GO:0044446,intracellular organelle part;GO:0031982,vesicle;GO:0044454,nuclear chromosome part;GO:0044422,organelle part;GO:0070062,extracellular vesicular exosome;GO:0044464,cell part;GO:0043230,extracellular organelle;GO:0043227,membrane-bounded organelle;GO:0000228,nuclear chromosome;GO:0000790,nuclear chromatin;GO:0043232,intracellular non-membrane-bounded or…	GO:0043169,cation binding;GO:0046872,metal ion binding;GO:0001968,fibronectin binding;GO:0005515,protein binding;GO:0005488,binding;GO:0043167,ion binding;GO:0031995,insulin-like growth factor II binding;GO:0031994,insulin-like growth factor I binding;GO:0005520,insulin-like growth factor binding;GO:0008047,enzyme activator activity;GO:0030234,enzyme regulator activity;GO:0019838,growth factor bi…
14	sp|P67936|TPM4_HUMAN	Tropomyosin alpha-4 chain OS=Homo sapiens GN=TPM4 PE=1 SV=3	up	2.01798	0.0138451	cellular component organization or biogenesis;developmental process;multicellular organismal process;cellular process	extracellular region part;extracellular region;organelle;macromolecular complex;cell part;cell;organelle part	structural molecule activity;binding		Dilated cardiomyopathy;Hypertrophic cardiomyopathy (HCM);Cardiac muscle contraction	GO:0007517,muscle organ development;GO:0030239,myofibril assembly;GO:0060048,cardiac muscle contraction;GO:0042692,muscle cell differentiation;GO:0006941,striated muscle contraction;GO:0046907,intracellular transport;GO:0001649,osteoblast differentiation;GO:0048731,system development;GO:0060047,heart contraction;GO:0030029,actin filament-based process;GO:0009888,tissue development;GO:0030705,cyto…	GO:0044446,intracellular organelle part;GO:0001725,stress fiber;GO:0005938,cell cortex;GO:0030017,sarcomere;GO:0031982,vesicle;GO:0044422,organelle part;GO:0070062,extracellular vesicular exosome;GO:0044464,cell part;GO:0043232,intracellular non-membrane-bounded organelle;GO:0030055,cell-substrate junction;GO:0005623,cell;GO:0044425,membrane part;GO:0005912,adherens junction;GO:0005576,extracellu…	GO:0043167,ion binding;GO:0043169,cation binding;GO:0005198,structural molecule activity;GO:0046872,metal ion binding;GO:0005515,protein binding;GO:0008307,structural constituent of muscle;GO:0005488,binding
15	sp|P01860|IGHG3_HUMAN	Ig gamma-3 chain C region OS=Homo sapiens GN=IGHG3 PE=1 SV=2	up	3.19875	0.0141079	immune system process;regulation of biological process;multi-organism process;establishment of localization;cellular component organization or biogenesis;positive regulation of biological process;multicellular organismal process;cellular process;response to stimulus;signaling;localization;biological regulation;metabolic process	extracellular region part;extracellular region;organelle;macromolecular complex;cell part;cell	binding		Fc epsilon RI signaling pathway;Viral myocarditis;Primary immunodeficiency;Staphylococcus aureus infection;Natural killer cell mediated cytotoxicity;Hematopoietic cell lineage;Asthma;Leishmaniasis;Phagosome;Systemic lupus erythematosus;Fc gamma R-mediated phagocytosis;Allograft rejection;B cell receptor signaling pathway;Dilated cardiomyopathy;Autoimmune thyroid disease;Intestinal immune network …	GO:0065007,biological regulation;GO:0009617,response to bacterium;GO:0009605,response to external stimulus;GO:0006950,response to stress;GO:0002694,regulation of leukocyte activation;GO:0048584,positive regulation of response to stimulus;GO:0009607,response to biotic stimulus;GO:0002252,immune effector process;GO:0007154,cell communication;GO:0043283,biopolymer metabolic process;GO:0016044,membra…	GO:0031982,vesicle;GO:0070062,extracellular vesicular exosome;GO:0044464,cell part;GO:0043230,extracellular organelle;GO:0043227,membrane-bounded organelle;GO:0044421,extracellular region part;GO:0005615,extracellular space;GO:0019814,immunoglobulin complex;GO:0043234,protein complex;GO:0005623,cell;GO:0032991,macromolecular complex;GO:0044425,membrane part;GO:0009986,cell surface;GO:0043226,orga…	GO:0003823,antigen binding;GO:0005515,protein binding;GO:0034987,immunoglobulin receptor binding;GO:0005102,receptor binding;GO:0005488,binding
16	sp|P68871|HBB_HUMAN	Hemoglobin subunit beta OS=Homo sapiens GN=HBB PE=1 SV=2	down	0.408701	0.000214632	regulation of biological process;establishment of localization;cellular component organization or biogenesis;positive regulation of biological process;multicellular organismal process;cellular process;response to stimulus;biological adhesion;localization;biological regulation;metabolic process;death	extracellular region part;organelle;cell part;membrane-enclosed lumen;extracellular region;cell;macromolecular complex;organelle part	transporter activity;binding;catalytic activity;antioxidant activity		Malaria	GO:0065007,biological regulation;GO:0050793,regulation of developmental process;GO:0009605,response to external stimulus;GO:0006950,response to stress;GO:0042221,response to chemical stimulus;GO:0070527,platelet aggregation;GO:0031326,regulation of cellular biosynthetic process;GO:0015698,inorganic anion transport;GO:0009891,positive regulation of biosynthetic process;GO:0016044,membrane organiza…	GO:0044444,cytoplasmic part;GO:0031982,vesicle;GO:0044445,cytosolic part;GO:0070062,extracellular vesicular exosome;GO:0044464,cell part;GO:0043230,extracellular organelle;GO:0016021,integral to membrane;GO:0043227,membrane-bounded organelle;GO:0044421,extracellular region part;GO:0044424,intracellular part;GO:0043234,protein complex;GO:0005737,cytoplasm;GO:0005623,cell;GO:0032991,macromolecular …	GO:0043169,cation binding;GO:0046906,tetrapyrrole binding;GO:0005515,protein binding;GO:0005506,iron ion binding;GO:0003824,catalytic activity;GO:0031720,haptoglobin binding;GO:0046914,transition metal ion binding;GO:0043167,ion binding;GO:0016209,antioxidant activity;GO:0016491,oxidoreductase activity;GO:0020037,heme binding;GO:0019825,oxygen binding;GO:0004601,peroxidase activity;GO:0046872,met…
17	sp|P01861|IGHG4_HUMAN	Ig gamma-4 chain C region OS=Homo sapiens GN=IGHG4 PE=1 SV=1	up	1.82872	0.0268972					Fc epsilon RI signaling pathway;Viral myocarditis;Primary immunodeficiency;Staphylococcus aureus infection;Natural killer cell mediated cytotoxicity;Hematopoietic cell lineage;Asthma;Leishmaniasis;Phagosome;Systemic lupus erythematosus;Fc gamma R-mediated phagocytosis;Allograft rejection;B cell receptor signaling pathway;Dilated cardiomyopathy;Autoimmune thyroid disease;Intestinal immune network …
18	sp|P07996|TSP1_HUMAN	Thrombospondin-1 OS=Homo sapiens GN=THBS1 PE=1 SV=2	up	3.69614	0.000555885	positive regulation of biological process;developmental process;multicellular organismal process;cellular process;growth;signaling;negative regulation of biological process;metabolic process;biological regulation;death;immune system process;regulation of biological process;cellular component organization or biogenesis;establishment of localization;cell proliferation;response to stimulus;biologica…	extracellular region part;organelle;cell part;membrane-enclosed lumen;extracellular region;cell;macromolecular complex;organelle part	binding		Phagosome;ECM-receptor interaction;p53 signaling pathway;Focal adhesion;Malaria;Bladder cancer;TGF-beta signaling pathway	GO:0051338,regulation of transferase activity;GO:0000187,activation of MAPK activity;GO:0010740,positive regulation of protein kinase cascade;GO:0034960,cellular biopolymer metabolic process;GO:0042221,response to chemical stimulus;GO:0002694,regulation of leukocyte activation;GO:0048731,system development;GO:0002576,platelet degranulation;GO:0031326,regulation of cellular biosynthetic process;GO…	GO:0044446,intracellular organelle part;GO:0031982,vesicle;GO:0044422,organelle part;GO:0043233,organelle lumen;GO:0070062,extracellular vesicular exosome;GO:0044464,cell part;GO:0043231,intracellular membrane-bounded organelle;GO:0031974,membrane-enclosed lumen;GO:0005623,cell;GO:0030141,secretory granule;GO:0044425,membrane part;GO:0005576,extracellular region;GO:0009897,external side of plasma…	GO:0043169,cation binding;GO:0008034,lipoprotein binding;GO:0005178,integrin binding;GO:0001968,fibronectin binding;GO:0008289,lipid binding;GO:0032403,protein complex binding;GO:0005515,protein binding;GO:0030247,polysaccharide binding;GO:0050840,extracellular matrix binding;GO:0043167,ion binding;GO:0005543,phospholipid binding;GO:0043236,laminin binding;GO:0001871,pattern binding;GO:0030169,lo…
19	sp|P02774|VTDB_HUMAN	Vitamin D-binding protein OS=Homo sapiens GN=GC PE=1 SV=1	up	2.82244	0.00414942	reproductive process;reproduction;regulation of biological process;multi-organism process;establishment of localization;positive regulation of biological process;developmental process;multicellular organismal process;cellular process;response to stimulus;signaling;negative regulation of biological process;localization;biological regulation;metabolic process	extracellular region part;extracellular region;organelle;cell part;cell;organelle part;membrane-enclosed lumen	transporter activity;binding;catalytic activity			GO:0051338,regulation of transferase activity;GO:0051348,negative regulation of transferase activity;GO:0034960,cellular biopolymer metabolic process;GO:0031347,regulation of defense response;GO:0042221,response to chemical stimulus;GO:0035303,regulation of dephosphorylation;GO:0048731,system development;GO:0051239,regulation of multicellular organismal process;GO:0043283,biopolymer metabolic pro…	GO:0044446,intracellular organelle part;GO:0005765,lysosomal membrane;GO:0031982,vesicle;GO:0005764,lysosome;GO:0044422,organelle part;GO:0043233,organelle lumen;GO:0070062,extracellular vesicular exosome;GO:0005789,endoplasmic reticulum membrane;GO:0044464,cell part;GO:0043231,intracellular membrane-bounded organelle;GO:0031974,membrane-enclosed lumen;GO:0043202,lysosomal lumen;GO:0005623,cell;G…	GO:0005515,protein binding;GO:0016798,hydrolase activity, acting on glycosyl bonds;GO:0003824,catalytic activity;GO:0005488,binding;GO:0008092,cytoskeletal protein binding;GO:0004553,hydrolase activity, hydrolyzing O-glycosyl compounds;GO:0005215,transporter activity;GO:0005102,receptor binding;GO:0003779,actin binding;GO:0016787,hydrolase activity
20	sp|P12259|FA5_HUMAN	Coagulation factor V OS=Homo sapiens GN=F5 PE=1 SV=4	up	3.13013	0.00771006	immune system process;regulation of biological process;establishment of localization;cellular component organization or biogenesis;developmental process;multicellular organismal process;cellular process;response to stimulus;localization;biological regulation;metabolic process	synapse part;extracellular region part;organelle;cell part;membrane-enclosed lumen;synapse;extracellular region;cell;macromolecular complex;organelle part	transporter activity;binding;channel regulator activity;catalytic activity		Complement and coagulation cascades	GO:0065007,biological regulation;GO:0034960,cellular biopolymer metabolic process;GO:0009605,response to external stimulus;GO:0048534,hemopoietic or lymphoid organ development;GO:0006950,response to stress;GO:0048731,system development;GO:0002576,platelet degranulation;GO:0032940,secretion by cell;GO:0030097,hemopoiesis;GO:0043283,biopolymer metabolic process;GO:0016044,membrane organization;GO:0…	GO:0044446,intracellular organelle part;GO:0044456,synapse part;GO:0044431,Golgi apparatus part;GO:0000139,Golgi membrane;GO:0031982,vesicle;GO:0044422,organelle part;GO:0043233,organelle lumen;GO:0044464,cell part;GO:0044463,cell projection part;GO:0005794,Golgi apparatus;GO:0043232,intracellular non-membrane-bounded organelle;GO:0043231,intracellular membrane-bounded organelle;GO:0031974,membra…	GO:0043169,cation binding;GO:0015075,ion transmembrane transporter activity;GO:0017171,serine hydrolase activity;GO:0005507,copper ion binding;GO:0015457,auxiliary transport protein activity;GO:0003824,catalytic activity;GO:0046914,transition metal ion binding;GO:0022838,substrate specific channel activity;GO:0043167,ion binding;GO:0022803,passive transmembrane transporter activity;GO:0016491,oxi…
21	sp|P48740|MASP1_HUMAN	Mannan-binding lectin serine protease 1 OS=Homo sapiens GN=MASP1 PE=1 SV=3	down	0.435786	0.0041358	immune system process;regulation of biological process;establishment of localization;cellular component organization or biogenesis;positive regulation of biological process;cellular process;response to stimulus;negative regulation of biological process;localization;biological regulation;metabolic process	extracellular region part;extracellular region	binding;catalytic activity	Posttranslational modification, protein turnover, chaperones ;	Complement and coagulation cascades;Staphylococcus aureus infection	GO:0009894,regulation of catabolic process;GO:0002673,regulation of acute inflammatory response;GO:0065007,biological regulation;GO:0002698,negative regulation of immune effector process;GO:0009605,response to external stimulus;GO:0031347,regulation of defense response;GO:0006950,response to stress;GO:0048584,positive regulation of response to stimulus;GO:0031324,negative regulation of cellular m…	GO:0005615,extracellular space;GO:0005576,extracellular region;GO:0044421,extracellular region part	GO:0043169,cation binding;GO:0042803,protein homodimerization activity;GO:0017171,serine hydrolase activity;GO:0005515,protein binding;GO:0003824,catalytic activity;GO:0043167,ion binding;GO:0008236,serine-type peptidase activity;GO:0046872,metal ion binding;GO:0008233,peptidase activity;GO:0042802,identical protein binding;GO:0070011,peptidase activity, acting on L-amino acid peptides;GO:0046983…
22	sp|P01591|IGJ_HUMAN	Immunoglobulin J chain OS=Homo sapiens GN=JCHAIN PE=1 SV=4	up	2.56903	0.00283238	immune system process;regulation of biological process;multi-organism process;cellular component organization or biogenesis;positive regulation of biological process;multicellular organismal process;response to stimulus;biological regulation;metabolic process	extracellular region part;extracellular region;organelle;macromolecular complex	binding			GO:0065007,biological regulation;GO:0032459,regulation of protein oligomerization;GO:0009617,response to bacterium;GO:0006950,response to stress;GO:0009607,response to biotic stimulus;GO:0003094,glomerular filtration;GO:0042592,homeostatic process;GO:0001894,tissue homeostasis;GO:0051130,positive regulation of cellular component organization;GO:0006955,immune response;GO:0060263,regulation of res…	GO:0031982,vesicle;GO:0043226,organelle;GO:0005576,extracellular region;GO:0070062,extracellular vesicular exosome;GO:0043230,extracellular organelle;GO:0065010,extracellular membrane-bounded organelle;GO:0031988,membrane-bounded vesicle;GO:0043227,membrane-bounded organelle;GO:0044421,extracellular region part	GO:0043169,cation binding;GO:0031210,phosphatidylcholine binding;GO:0042803,protein homodimerization activity;GO:0008289,lipid binding;GO:0032403,protein complex binding;GO:0005515,protein binding;GO:0043566,structure-specific DNA binding;GO:0030247,polysaccharide binding;GO:0043167,ion binding;GO:0050997,quaternary ammonium group binding;GO:0043178,alcohol binding;GO:0005543,phospholipid binding…
23	sp|P04275|VWF_HUMAN	von Willebrand factor OS=Homo sapiens GN=VWF PE=1 SV=4	up	1.62853	0.0170024	response to stimulus;biological adhesion;cellular component organization or biogenesis;developmental process;biological regulation;multicellular organismal process;cellular process	extracellular region part;extracellular region;organelle;cell part;cell	binding		Complement and coagulation cascades;ECM-receptor interaction;Focal adhesion	GO:0065007,biological regulation;GO:0051260,protein homooligomerization;GO:0009605,response to external stimulus;GO:0070271,protein complex biogenesis;GO:0006950,response to stress;GO:0048731,system development;GO:0043933,macromolecular complex subunit organization;GO:0051259,protein oligomerization;GO:0009611,response to wounding;GO:0007596,blood coagulation;GO:0009987,cellular process;GO:000759…	GO:0043229,intracellular organelle;GO:0044444,cytoplasmic part;GO:0005783,endoplasmic reticulum;GO:0031982,vesicle;GO:0070062,extracellular vesicular exosome;GO:0044464,cell part;GO:0030135,coated vesicle;GO:0043230,extracellular organelle;GO:0043227,membrane-bounded organelle;GO:0044421,extracellular region part;GO:0043231,intracellular membrane-bounded organelle;GO:0044424,intracellular part;GO…	GO:0042803,protein homodimerization activity;GO:0005178,integrin binding;GO:0001948,glycoprotein binding;GO:0032403,protein complex binding;GO:0042802,identical protein binding;GO:0005515,protein binding;GO:0005488,binding;GO:0046983,protein dimerization activity;GO:0019899,enzyme binding;GO:0002020,protease binding;GO:0051087,chaperone binding;GO:0005102,receptor binding;GO:0005518,collagen bind…
24	sp|P60660|MYL6_HUMAN	Myosin light polypeptide 6 OS=Homo sapiens GN=MYL6 PE=1 SV=2	up	4.43836	0.00264038	regulation of biological process;cellular component organization or biogenesis;developmental process;multicellular organismal process;cellular process;response to stimulus;signaling;locomotion;biological regulation	extracellular region part;extracellular region;organelle;macromolecular complex;cell part;cell;organelle part	structural molecule activity;binding;catalytic activity	Signal transduction mechanisms ; Cytoskeleton ; Cell cycle control, cell division, chromosome partitioning ; General function prediction only ;	Vascular smooth muscle contraction	GO:0065007,biological regulation;GO:0007517,muscle organ development;GO:0031175,neuron projection development;GO:0007167,enzyme linked receptor protein signaling pathway;GO:0046907,intracellular transport;GO:0000902,cell morphogenesis;GO:0048731,system development;GO:0030029,actin filament-based process;GO:0009888,tissue development;GO:0030705,cytoskeleton-dependent intracellular transport;GO:006…	GO:0043229,intracellular organelle;GO:0044446,intracellular organelle part;GO:0044444,cytoplasmic part;GO:0031982,vesicle;GO:0042995,cell projection;GO:0044422,organelle part;GO:0070062,extracellular vesicular exosome;GO:0015629,actin cytoskeleton;GO:0044464,cell part;GO:0043230,extracellular organelle;GO:0043227,membrane-bounded organelle;GO:0043232,intracellular non-membrane-bounded organelle;G…	GO:0043169,cation binding;GO:0017111,nucleoside-triphosphatase activity;GO:0005515,protein binding;GO:0003824,catalytic activity;GO:0000146,microfilament motor activity;GO:0003774,motor activity;GO:0043167,ion binding;GO:0008307,structural constituent of muscle;GO:0016817,hydrolase activity, acting on acid anhydrides;GO:0046872,metal ion binding;GO:0030898,actin-dependent ATPase activity;GO:00426…
25	sp|P63104|1433Z_HUMAN	14-3-3 protein zeta/delta OS=Homo sapiens GN=YWHAZ PE=1 SV=1	up	2.26906	0.00633444	immune system process;regulation of biological process;establishment of localization;cellular component organization or biogenesis;multicellular organismal process;cellular process;response to stimulus;signaling;negative regulation of biological process;localization;biological regulation;metabolic process;death	synapse part;extracellular region part;organelle;cell part;membrane-enclosed lumen;synapse;extracellular region;cell;macromolecular complex;organelle part	binding;catalytic activity	Signal transduction mechanisms ;	Cell cycle;Neurotrophin signaling pathway;Oocyte meiosis;Pathogenic Escherichia coli infection	GO:0065007,biological regulation;GO:0034960,cellular biopolymer metabolic process;GO:0015837,amine transport;GO:0050793,regulation of developmental process;GO:0009605,response to external stimulus;GO:0007267,cell-cell signaling;GO:0006950,response to stress;GO:0042221,response to chemical stimulus;GO:0045321,leukocyte activation;GO:0032940,secretion by cell;GO:0002252,immune effector process;GO:0…	GO:0044446,intracellular organelle part;GO:0044456,synapse part;GO:0031981,nuclear lumen;GO:0031982,vesicle;GO:0005764,lysosome;GO:0044422,organelle part;GO:0043233,organelle lumen;GO:0070062,extracellular vesicular exosome;GO:0044464,cell part;GO:0005654,nucleoplasm;GO:0043232,intracellular non-membrane-bounded organelle;GO:0043231,intracellular membrane-bounded organelle;GO:0005739,mitochondrio…	GO:0019901,protein kinase binding;GO:0032403,protein complex binding;GO:0005515,protein binding;GO:0003824,catalytic activity;GO:0019904,protein domain specific binding;GO:0019899,enzyme binding;GO:0016491,oxidoreductase activity;GO:0031625,ubiquitin protein ligase binding;GO:0019900,kinase binding;GO:0016301,kinase activity;GO:0004497,monooxygenase activity;GO:0042802,identical protein binding;G…
26	sp|Q9Y490|TLN1_HUMAN	Talin-1 OS=Homo sapiens GN=TLN1 PE=1 SV=3	up	2.28777	0.000271788	establishment of localization;cellular component organization or biogenesis;developmental process;multicellular organismal process;cellular process;response to stimulus;biological adhesion;viral reproduction;localization;locomotion;metabolic process;biological regulation	extracellular region part;extracellular region;organelle;cell part;cell;organelle part	structural molecule activity;binding		Focal adhesion	GO:0065007,biological regulation;GO:0034960,cellular biopolymer metabolic process;GO:0009605,response to external stimulus;GO:0031175,neuron projection development;GO:0006950,response to stress;GO:0000902,cell morphogenesis;GO:0048731,system development;GO:0002576,platelet degranulation;GO:0070527,platelet aggregation;GO:0032940,secretion by cell;GO:0000904,cell morphogenesis involved in differen…	GO:0044446,intracellular organelle part;GO:0031256,leading edge membrane;GO:0031982,vesicle;GO:0001726,ruffle;GO:0044422,organelle part;GO:0070062,extracellular vesicular exosome;GO:0044464,cell part;GO:0044463,cell projection part;GO:0005911,cell-cell junction;GO:0043232,intracellular non-membrane-bounded organelle;GO:0030055,cell-substrate junction;GO:0032587,ruffle membrane;GO:0005623,cell;GO:…	GO:0005178,integrin binding;GO:0032403,protein complex binding;GO:0005515,protein binding;GO:0017166,vinculin binding;GO:0019904,protein domain specific binding;GO:0005488,binding;GO:0008092,cytoskeletal protein binding;GO:0005198,structural molecule activity;GO:0005200,structural constituent of cytoskeleton;GO:0005102,receptor binding;GO:0003779,actin binding;GO:0051015,actin filament binding
27	sp|P00738|HPT_HUMAN	Haptoglobin OS=Homo sapiens GN=HP PE=1 SV=1	up	1.92365	0.0115823	immune system process;regulation of biological process;multi-organism process;establishment of localization;cellular component organization or biogenesis;positive regulation of biological process;cellular process;response to stimulus;signaling;negative regulation of biological process;localization;biological regulation;metabolic process;death	extracellular region part;organelle;cell part;membrane-enclosed lumen;extracellular region;cell;macromolecular complex;organelle part	binding;catalytic activity;antioxidant activity		Complement and coagulation cascades;Phagosome;Systemic lupus erythematosus;Staphylococcus aureus infection	GO:0065007,biological regulation;GO:0010941,regulation of cell death;GO:0051094,positive regulation of developmental process;GO:0007219,Notch signaling pathway;GO:0050793,regulation of developmental process;GO:0009617,response to bacterium;GO:0009605,response to external stimulus;GO:0006950,response to stress;GO:0042221,response to chemical stimulus;GO:0044238,primary metabolic process;GO:0009607…	GO:0043234,protein complex;GO:0032991,macromolecular complex;GO:0031982,vesicle;GO:0043226,organelle;GO:0005576,extracellular region;GO:0070062,extracellular vesicular exosome;GO:0043230,extracellular organelle;GO:0065010,extracellular membrane-bounded organelle;GO:0043227,membrane-bounded organelle;GO:0031838,haptoglobin-hemoglobin complex;GO:0031988,membrane-bounded vesicle;GO:0044421,extracell…	GO:0008233,peptidase activity;GO:0070011,peptidase activity, acting on L-amino acid peptides;GO:0017171,serine hydrolase activity;GO:0005515,protein binding;GO:0003824,catalytic activity;GO:0030492,hemoglobin binding;GO:0005488,binding;GO:0016209,antioxidant activity;GO:0008236,serine-type peptidase activity;GO:0016787,hydrolase activity;GO:0004252,serine-type endopeptidase activity;GO:0004175,en…
28	sp|P02746|C1QB_HUMAN	Complement C1q subcomponent subunit B OS=Homo sapiens GN=C1QB PE=1 SV=3	down	0.558076	0.0217419	immune system process;regulation of biological process;positive regulation of biological process;developmental process;multicellular organismal process;response to stimulus;biological regulation;metabolic process	extracellular region part;extracellular region;organelle;macromolecular complex	binding		Complement and coagulation cascades;Chagas disease;Systemic lupus erythematosus;Staphylococcus aureus infection;Prion diseases	GO:0048839,inner ear development;GO:0065007,biological regulation;GO:0048583,regulation of response to stimulus;GO:0009605,response to external stimulus;GO:0006950,response to stress;GO:0042221,response to chemical stimulus;GO:0048731,system development;GO:0009719,response to endogenous stimulus;GO:0044238,primary metabolic process;GO:0051384,response to glucocorticoid stimulus;GO:0048584,positiv…	GO:0005615,extracellular space;GO:0043234,protein complex;GO:0032991,macromolecular complex;GO:0031982,vesicle;GO:0043226,organelle;GO:0005576,extracellular region;GO:0070062,extracellular vesicular exosome;GO:0043230,extracellular organelle;GO:0065010,extracellular membrane-bounded organelle;GO:0031988,membrane-bounded vesicle;GO:0043227,membrane-bounded organelle;GO:0044421,extracellular region…	GO:0042803,protein homodimerization activity;GO:0042802,identical protein binding;GO:0005515,protein binding;GO:0005488,binding;GO:0046983,protein dimerization activity
29	sp|Q15485|FCN2_HUMAN	Ficolin-2 OS=Homo sapiens GN=FCN2 PE=1 SV=2	down	0.266466	0.0205296	reproduction;multi-organism process;positive regulation of biological process;multicellular organismal process;cellular process;signaling;viral reproduction;negative regulation of biological process;biological regulation;metabolic process;immune system process;reproductive process;regulation of biological process;cellular component organization or biogenesis;establishment of localization;response…	extracellular region part;extracellular region;organelle;cell part;cell	molecular transducer activity;binding			GO:0065007,biological regulation;GO:0031349,positive regulation of defense response;GO:0009617,response to bacterium;GO:0009605,response to external stimulus;GO:0031347,regulation of defense response;GO:0006950,response to stress;GO:0048584,positive regulation of response to stimulus;GO:0009607,response to biotic stimulus;GO:0002252,immune effector process;GO:0007154,cell communication;GO:0043283…	GO:0031982,vesicle;GO:0070062,extracellular vesicular exosome;GO:0005581,collagen;GO:0044464,cell part;GO:0043230,extracellular organelle;GO:0019897,extrinsic to plasma membrane;GO:0043227,membrane-bounded organelle;GO:0044420,extracellular matrix part;GO:0044421,extracellular region part;GO:0005623,cell;GO:0005578,proteinaceous extracellular matrix;GO:0044425,membrane part;GO:0009986,cell surfac…	GO:0043169,cation binding;GO:0048029,monosaccharide binding;GO:0004872,receptor activity;GO:0005515,protein binding;GO:0043167,ion binding;GO:0060089,molecular transducer activity;GO:0004871,signal transducer activity;GO:0043394,proteoglycan binding;GO:0046872,metal ion binding;GO:0003823,antigen binding;GO:0001948,glycoprotein binding;GO:0005529,sugar binding;GO:0001664,G-protein-coupled recepto…
30	sp|P01782|HV309_HUMAN	Immunoglobulin heavy variable 3-9 OS=Homo sapiens GN=IGHV3-9 PE=1 SV=2	up	2.60445	0.0205813					Fc epsilon RI signaling pathway;Viral myocarditis;Primary immunodeficiency;Staphylococcus aureus infection;Natural killer cell mediated cytotoxicity;Hematopoietic cell lineage;Asthma;Leishmaniasis;Phagosome;Systemic lupus erythematosus;Fc gamma R-mediated phagocytosis;Allograft rejection;B cell receptor signaling pathway;Dilated cardiomyopathy;Autoimmune thyroid disease;Intestinal immune network …
31	sp|P55285|CADH6_HUMAN	Cadherin-6 OS=Homo sapiens GN=CDH6 PE=1 SV=1	down	0.434581	0.0210025	reproductive process;reproduction;regulation of biological process;cellular component organization or biogenesis;developmental process;multicellular organismal process;cellular process;response to stimulus;biological adhesion;signaling;biological regulation	extracellular region part;extracellular region;organelle;cell part;cell	binding			GO:0003006,reproductive developmental process;GO:0065007,biological regulation;GO:0007219,Notch signaling pathway;GO:0010926,anatomical structure formation;GO:0032502,developmental process;GO:0046545,development of primary female sexual characteristics;GO:0048731,system development;GO:0032501,multicellular organismal process;GO:0034330,cell junction organization;GO:0007154,cell communication;GO:0…	GO:0031982,vesicle;GO:0070062,extracellular vesicular exosome;GO:0044464,cell part;GO:0043230,extracellular organelle;GO:0016021,integral to membrane;GO:0043227,membrane-bounded organelle;GO:0044421,extracellular region part;GO:0005623,cell;GO:0044425,membrane part;GO:0043226,organelle;GO:0005886,plasma membrane;GO:0005576,extracellular region;GO:0005887,integral to plasma membrane;GO:0065010,ext…	GO:0043167,ion binding;GO:0043169,cation binding;GO:0046872,metal ion binding;GO:0005509,calcium ion binding;GO:0005488,binding
32	sp|Q5T749|KPRP_HUMAN	Keratinocyte proline-rich protein OS=Homo sapiens GN=KPRP PE=1 SV=1	down	0.31316	0.0333433		extracellular region part;extracellular region;organelle					GO:0031982,vesicle;GO:0043226,organelle;GO:0005576,extracellular region;GO:0070062,extracellular vesicular exosome;GO:0043230,extracellular organelle;GO:0065010,extracellular membrane-bounded organelle;GO:0031988,membrane-bounded vesicle;GO:0043227,membrane-bounded organelle;GO:0044421,extracellular region part
33	sp|P01834|IGKC_HUMAN	Ig kappa chain C region OS=Homo sapiens GN=IGKC PE=1 SV=1	up	5.13079	0.00132569	immune system process;regulation of biological process;multi-organism process;establishment of localization;cellular component organization or biogenesis;positive regulation of biological process;multicellular organismal process;cellular process;response to stimulus;signaling;localization;biological regulation;metabolic process	extracellular region part;extracellular region;organelle;macromolecular complex;cell part;cell	binding		Primary immunodeficiency	GO:0065007,biological regulation;GO:0009617,response to bacterium;GO:0009605,response to external stimulus;GO:0006950,response to stress;GO:0002694,regulation of leukocyte activation;GO:0048584,positive regulation of response to stimulus;GO:0009607,response to biotic stimulus;GO:0002252,immune effector process;GO:0007154,cell communication;GO:0043283,biopolymer metabolic process;GO:0016044,membra…	GO:0031982,vesicle;GO:0070062,extracellular vesicular exosome;GO:0044464,cell part;GO:0043230,extracellular organelle;GO:0043227,membrane-bounded organelle;GO:0044421,extracellular region part;GO:0005615,extracellular space;GO:0019814,immunoglobulin complex;GO:0043234,protein complex;GO:0005623,cell;GO:0032991,macromolecular complex;GO:0044425,membrane part;GO:0009986,cell surface;GO:0043226,orga…	GO:0003823,antigen binding;GO:0005515,protein binding;GO:0034987,immunoglobulin receptor binding;GO:0005102,receptor binding;GO:0005488,binding
34	sp|P11226|MBL2_HUMAN	Mannose-binding protein C OS=Homo sapiens GN=MBL2 PE=1 SV=2	down	0.618668	0.0142343	immune system process;regulation of biological process;multi-organism process;establishment of localization;cellular component organization or biogenesis;positive regulation of biological process;cellular process;cell killing;response to stimulus;growth;viral reproduction;negative regulation of biological process;localization;biological regulation;metabolic process	extracellular region part;extracellular region;cell part;cell	binding		Complement and coagulation cascades;Phagosome;Staphylococcus aureus infection	GO:0065007,biological regulation;GO:0009617,response to bacterium;GO:0009605,response to external stimulus;GO:0006950,response to stress;GO:0042221,response to chemical stimulus;GO:0048584,positive regulation of response to stimulus;GO:0009607,response to biotic stimulus;GO:0002252,immune effector process;GO:0043283,biopolymer metabolic process;GO:0016044,membrane organization;GO:0016064,immunogl…	GO:0005615,extracellular space;GO:0005623,cell;GO:0005578,proteinaceous extracellular matrix;GO:0009986,cell surface;GO:0031012,extracellular matrix;GO:0005576,extracellular region;GO:0005581,collagen;GO:0044464,cell part;GO:0044420,extracellular matrix part;GO:0044421,extracellular region part	GO:0043169,cation binding;GO:0046872,metal ion binding;GO:0048029,monosaccharide binding;GO:0005515,protein binding;GO:0005529,sugar binding;GO:0005488,binding;GO:0043167,ion binding;GO:0005509,calcium ion binding;GO:0005537,mannose binding;GO:0048306,calcium-dependent protein binding;GO:0005102,receptor binding;GO:0030246,carbohydrate binding
35	sp|P13645|K1C10_HUMAN	Keratin, type I cytoskeletal 10 OS=Homo sapiens GN=KRT10 PE=1 SV=6	down	0.228261	0.0120939	response to stimulus;developmental process;multicellular organismal process;cellular process	extracellular region part;extracellular region;organelle;macromolecular complex;cell part;cell;organelle part	structural molecule activity		Staphylococcus aureus infection;Pathogenic Escherichia coli infection	GO:0009987,cellular process;GO:0048869,cellular developmental process;GO:0032502,developmental process;GO:0030154,cell differentiation	GO:0043229,intracellular organelle;GO:0044446,intracellular organelle part;GO:0031982,vesicle;GO:0044422,organelle part;GO:0070062,extracellular vesicular exosome;GO:0044464,cell part;GO:0043230,extracellular organelle;GO:0043227,membrane-bounded organelle;GO:0045111,intermediate filament cytoskeleton;GO:0043232,intracellular non-membrane-bounded organelle;GO:0044421,extracellular region part;GO:…	GO:0005198,structural molecule activity
36	sp|O14960|LECT2_HUMAN	Leukocyte cell-derived chemotaxin-2 OS=Homo sapiens GN=LECT2 PE=1 SV=2	down	0.356659	0.0181397	regulation of biological process;multi-organism process;cellular component organization or biogenesis;developmental process;multicellular organismal process;cellular process;response to stimulus;signaling;negative regulation of biological process;locomotion;biological regulation	extracellular region part;extracellular region;cell part;cell	binding			GO:0065007,biological regulation;GO:0009617,response to bacterium;GO:0009605,response to external stimulus;GO:0042221,response to chemical stimulus;GO:0000902,cell morphogenesis;GO:0048731,system development;GO:0009607,response to biotic stimulus;GO:0009966,regulation of signal transduction;GO:0009987,cellular process;GO:0010648,negative regulation of cell communication;GO:0032989,cellular compon…	GO:0005615,extracellular space;GO:0005576,extracellular region;GO:0044424,intracellular part;GO:0044464,cell part;GO:0005737,cytoplasm;GO:0005623,cell;GO:0005622,intracellular;GO:0044421,extracellular region part	GO:0042802,identical protein binding;GO:0005515,protein binding;GO:0005488,binding
37	sp|P22352|GPX3_HUMAN	Glutathione peroxidase 3 OS=Homo sapiens GN=GPX3 PE=1 SV=2	up	3.94283	0.00567964	response to stimulus;reproductive process;reproduction;multi-organism process;cellular component organization or biogenesis;metabolic process;cellular process	extracellular region part;extracellular region;organelle	binding;catalytic activity;antioxidant activity	Posttranslational modification, protein turnover, chaperones ;	Glutathione metabolism;Amyotrophic lateral sclerosis (ALS);Arachidonic acid metabolism;Huntington's disease	GO:0033554,cellular response to stress;GO:0051260,protein homooligomerization;GO:0051289,protein homotetramerization;GO:0070271,protein complex biogenesis;GO:0006950,response to stress;GO:0042221,response to chemical stimulus;GO:0009719,response to endogenous stimulus;GO:0044238,primary metabolic process;GO:0051384,response to glucocorticoid stimulus;GO:0009607,response to biotic stimulus;GO:0031…	GO:0005615,extracellular space;GO:0031982,vesicle;GO:0043226,organelle;GO:0005576,extracellular region;GO:0070062,extracellular vesicular exosome;GO:0043230,extracellular organelle;GO:0065010,extracellular membrane-bounded organelle;GO:0031988,membrane-bounded vesicle;GO:0043227,membrane-bounded organelle;GO:0044421,extracellular region part	GO:0005515,protein binding;GO:0003824,catalytic activity;GO:0005488,binding;GO:0016209,antioxidant activity;GO:0042277,peptide binding;GO:0008134,transcription factor binding;GO:0016491,oxidoreductase activity;GO:0016684,oxidoreductase activity, acting on peroxide as acceptor;GO:0004601,peroxidase activity
38	sp|P02743|SAMP_HUMAN	Serum amyloid P-component OS=Homo sapiens GN=APCS PE=1 SV=2	down	0.28074	0.00136073	reproductive process;reproduction;immune system process;regulation of biological process;multi-organism process;cellular component organization or biogenesis;developmental process;multicellular organismal process;cellular process;response to stimulus;viral reproduction;negative regulation of biological process;locomotion;biological regulation;metabolic process	extracellular region part;extracellular region;organelle;macromolecular complex;cell part;cell	binding		Pancreatic secretion;Proximal tubule bicarbonate reclamation;Gastric acid secretion;Collecting duct acid secretion;Nitrogen metabolism	GO:0002673,regulation of acute inflammatory response;GO:0065007,biological regulation;GO:0034960,cellular biopolymer metabolic process;GO:0048583,regulation of response to stimulus;GO:0032102,negative regulation of response to external stimulus;GO:0050793,regulation of developmental process;GO:0009605,response to external stimulus;GO:0070271,protein complex biogenesis;GO:0031347,regulation of def…	GO:0043229,intracellular organelle;GO:0031982,vesicle;GO:0070062,extracellular vesicular exosome;GO:0044464,cell part;GO:0043230,extracellular organelle;GO:0043227,membrane-bounded organelle;GO:0044421,extracellular region part;GO:0043231,intracellular membrane-bounded organelle;GO:0043234,protein complex;GO:0044424,intracellular part;GO:0032991,macromolecular complex;GO:0005634,nucleus;GO:000562…	GO:0043169,cation binding;GO:0046872,metal ion binding;GO:0005515,protein binding;GO:0005488,binding;GO:0001846,opsonin binding;GO:0043167,ion binding;GO:0005509,calcium ion binding;GO:0001849,complement component C1q binding;GO:0001848,complement binding;GO:0046790,virion binding;GO:0030246,carbohydrate binding
39	sp|A0A0B4J1V2|HV226_HUMAN	Immunoglobulin heavy variable 2-26 OS=Homo sapiens GN=IGHV2-26 PE=3 SV=1	down	0.240656	0.0274183					Fc epsilon RI signaling pathway;Viral myocarditis;Primary immunodeficiency;Staphylococcus aureus infection;Natural killer cell mediated cytotoxicity;Hematopoietic cell lineage;Asthma;Leishmaniasis;Phagosome;Systemic lupus erythematosus;Fc gamma R-mediated phagocytosis;Allograft rejection;B cell receptor signaling pathway;Dilated cardiomyopathy;Autoimmune thyroid disease;Intestinal immune network …
40	sp|P22792|CPN2_HUMAN	Carboxypeptidase N subunit 2 OS=Homo sapiens GN=CPN2 PE=1 SV=3	down	0.631192	0.0460822	regulation of biological process;metabolic process;biological regulation	extracellular region part;extracellular region;organelle	enzyme regulator activity	Function unknown ;		GO:0065007,biological regulation;GO:0043170,macromolecule metabolic process;GO:0060255,regulation of macromolecule metabolic process;GO:0050789,regulation of biological process;GO:0019538,protein metabolic process;GO:0050790,regulation of catalytic activity;GO:0031647,regulation of protein stability;GO:0019222,regulation of metabolic process;GO:0044238,primary metabolic process;GO:0050821,protein…	GO:0031982,vesicle;GO:0043226,organelle;GO:0005576,extracellular region;GO:0070062,extracellular vesicular exosome;GO:0043230,extracellular organelle;GO:0065010,extracellular membrane-bounded organelle;GO:0031988,membrane-bounded vesicle;GO:0043227,membrane-bounded organelle;GO:0044421,extracellular region part	GO:0030234,enzyme regulator activity
41	sp|P02790|HEMO_HUMAN	Hemopexin OS=Homo sapiens GN=HPX PE=1 SV=2	up	2.69719	0.0117437	immune system process;regulation of biological process;establishment of localization;cellular component organization or biogenesis;positive regulation of biological process;cellular process;response to stimulus;signaling;viral reproduction;localization;biological regulation;metabolic process	extracellular region part;extracellular region;organelle;cell part;cell;organelle part;membrane-enclosed lumen	transporter activity;binding;catalytic activity			GO:0065007,biological regulation;GO:0050801,ion homeostasis;GO:0010740,positive regulation of protein kinase cascade;GO:0001934,positive regulation of protein amino acid phosphorylation;GO:0042440,pigment metabolic process;GO:0048584,positive regulation of response to stimulus;GO:0019725,cellular homeostasis;GO:0046483,heterocycle metabolic process;GO:0043283,biopolymer metabolic process;GO:00160…	GO:0031982,vesicle;GO:0043226,organelle;GO:0005576,extracellular region;GO:0070062,extracellular vesicular exosome;GO:0043230,extracellular organelle;GO:0065010,extracellular membrane-bounded organelle;GO:0031988,membrane-bounded vesicle;GO:0043227,membrane-bounded organelle;GO:0044421,extracellular region part	GO:0043169,cation binding;GO:0046872,metal ion binding;GO:0046906,tetrapyrrole binding;GO:0005515,protein binding;GO:0005506,iron ion binding;GO:0016798,hydrolase activity, acting on glycosyl bonds;GO:0003824,catalytic activity;GO:0005488,binding;GO:0046914,transition metal ion binding;GO:0043167,ion binding;GO:0020037,heme binding;GO:0005215,transporter activity;GO:0016787,hydrolase activity
42	sp|P69905|HBA_HUMAN	Hemoglobin subunit alpha OS=Homo sapiens GN=HBA1 PE=1 SV=2	down	0.457759	0.00958421	response to stimulus;regulation of biological process;establishment of localization;cellular component organization or biogenesis;positive regulation of biological process;localization;metabolic process;biological regulation;death;cellular process	extracellular region part;organelle;cell part;membrane-enclosed lumen;extracellular region;cell;macromolecular complex;organelle part	transporter activity;binding;catalytic activity;antioxidant activity		Malaria	GO:0033554,cellular response to stress;GO:0065007,biological regulation;GO:0010941,regulation of cell death;GO:0051094,positive regulation of developmental process;GO:0050793,regulation of developmental process;GO:0070271,protein complex biogenesis;GO:0006950,response to stress;GO:0042221,response to chemical stimulus;GO:0015698,inorganic anion transport;GO:0016044,membrane organization;GO:004393…	GO:0043229,intracellular organelle;GO:0044446,intracellular organelle part;GO:0030529,ribonucleoprotein complex;GO:0044444,cytoplasmic part;GO:0031982,vesicle;GO:0044445,cytosolic part;GO:0044422,organelle part;GO:0070062,extracellular vesicular exosome;GO:0044464,cell part;GO:0043230,extracellular organelle;GO:0043227,membrane-bounded organelle;GO:0043232,intracellular non-membrane-bounded organ…	GO:0043169,cation binding;GO:0046906,tetrapyrrole binding;GO:0005515,protein binding;GO:0005506,iron ion binding;GO:0003824,catalytic activity;GO:0031720,haptoglobin binding;GO:0046914,transition metal ion binding;GO:0043167,ion binding;GO:0016209,antioxidant activity;GO:0016491,oxidoreductase activity;GO:0020037,heme binding;GO:0019825,oxygen binding;GO:0004601,peroxidase activity;GO:0046872,met…
43	sp|P68366|TBA4A_HUMAN	Tubulin alpha-4A chain OS=Homo sapiens GN=TUBA4A PE=1 SV=1	up	2.48089	0.00898759	establishment of localization;cellular component organization or biogenesis;developmental process;multicellular organismal process;cellular process;response to stimulus;localization;biological regulation;metabolic process	extracellular region part;extracellular region;organelle;macromolecular complex;cell part;cell;organelle part	structural molecule activity;binding;catalytic activity	Cytoskeleton ;	Phagosome;Gap junction;Pathogenic Escherichia coli infection	GO:0065007,biological regulation;GO:0034960,cellular biopolymer metabolic process;GO:0007517,muscle organ development;GO:0048747,muscle fiber development;GO:0009605,response to external stimulus;GO:0006950,response to stress;GO:0014823,response to activity;GO:0048731,system development;GO:0002576,platelet degranulation;GO:0000278,mitotic cell cycle;GO:0009888,tissue development;GO:0032940,secreti…	GO:0043229,intracellular organelle;GO:0044446,intracellular organelle part;GO:0044444,cytoplasmic part;GO:0031982,vesicle;GO:0044422,organelle part;GO:0070062,extracellular vesicular exosome;GO:0044464,cell part;GO:0043230,extracellular organelle;GO:0005881,cytoplasmic microtubule;GO:0043227,membrane-bounded organelle;GO:0043232,intracellular non-membrane-bounded organelle;GO:0044421,extracellula…	GO:0032553,ribonucleotide binding;GO:0017111,nucleoside-triphosphatase activity;GO:0005515,protein binding;GO:0003824,catalytic activity;GO:0003924,GTPase activity;GO:0019899,enzyme binding;GO:0032561,guanyl ribonucleotide binding;GO:0016817,hydrolase activity, acting on acid anhydrides;GO:0032555,purine ribonucleotide binding;GO:0000166,nucleotide binding;GO:0005488,binding;GO:0019001,guanyl nuc…
44	sp|P01023|A2MG_HUMAN	Alpha-2-macroglobulin OS=Homo sapiens GN=A2M PE=1 SV=3	up	3.37382	0.00532516	reproduction;positive regulation of biological process;developmental process;multicellular organismal process;cellular process;signaling;negative regulation of biological process;biological regulation;metabolic process;immune system process;reproductive process;regulation of biological process;cellular component organization or biogenesis;establishment of localization;rhythmic process;response to…	extracellular region part;extracellular region;organelle;cell part;cell;organelle part;membrane-enclosed lumen	enzyme regulator activity;binding	General function prediction only ;	Complement and coagulation cascades	GO:0009894,regulation of catabolic process;GO:0002673,regulation of acute inflammatory response;GO:0031347,regulation of defense response;GO:0042221,response to chemical stimulus;GO:0048731,system development;GO:0002576,platelet degranulation;GO:0052548,regulation of endopeptidase activity;GO:0032940,secretion by cell;GO:0009892,negative regulation of metabolic process;GO:0007548,sex differentiat…	GO:0043229,intracellular organelle;GO:0044446,intracellular organelle part;GO:0044444,cytoplasmic part;GO:0031091,platelet alpha granule;GO:0031982,vesicle;GO:0044422,organelle part;GO:0043233,organelle lumen;GO:0070062,extracellular vesicular exosome;GO:0044433,cytoplasmic vesicle part;GO:0044464,cell part;GO:0043230,extracellular organelle;GO:0060205,cytoplasmic membrane-bounded vesicle lumen;G…	GO:0042803,protein homodimerization activity;GO:0005515,protein binding;GO:0004867,serine-type endopeptidase inhibitor activity;GO:0019899,enzyme binding;GO:0030234,enzyme regulator activity;GO:0004857,enzyme inhibitor activity;GO:0019838,growth factor binding;GO:0042802,identical protein binding;GO:0046983,protein dimerization activity;GO:0005488,binding;GO:0019955,cytokine binding;GO:0002020,pr…
45	sp|Q03591|FHR1_HUMAN	Complement factor H-related protein 1 OS=Homo sapiens GN=CFHR1 PE=1 SV=2	down	0.315354	0.00371746	response to stimulus;immune system process;regulation of biological process;positive regulation of biological process;metabolic process;biological regulation	extracellular region part;extracellular region;organelle	binding		Complement and coagulation cascades;Staphylococcus aureus infection	GO:0009894,regulation of catabolic process;GO:0002673,regulation of acute inflammatory response;GO:0065007,biological regulation;GO:0060255,regulation of macromolecule metabolic process;GO:0010953,regulation of protein maturation by peptide bond cleavage;GO:0048583,regulation of response to stimulus;GO:0031347,regulation of defense response;GO:0006950,response to stress;GO:0080134,regulation of r…	GO:0031982,vesicle;GO:0043226,organelle;GO:0005576,extracellular region;GO:0070062,extracellular vesicular exosome;GO:0043230,extracellular organelle;GO:0065010,extracellular membrane-bounded organelle;GO:0031988,membrane-bounded vesicle;GO:0043227,membrane-bounded organelle;GO:0044421,extracellular region part	GO:0043394,proteoglycan binding;GO:0001948,glycoprotein binding;GO:0005515,protein binding;GO:0030247,polysaccharide binding;GO:0005488,binding;GO:0008201,heparin binding;GO:0030246,carbohydrate binding;GO:0005539,glycosaminoglycan binding;GO:0001871,pattern binding
46	sp|Q5D862|FILA2_HUMAN	Filaggrin-2 OS=Homo sapiens GN=FLG2 PE=1 SV=1	down	0.376017	0.0199241	immune system process;developmental process;multicellular organismal process;cellular process	extracellular region part;extracellular region;organelle;cell part;cell	binding			GO:0032502,developmental process;GO:0048534,hemopoietic or lymphoid organ development;GO:0002376,immune system process;GO:0048731,system development;GO:0009987,cellular process;GO:0048869,cellular developmental process;GO:0032501,multicellular organismal process;GO:0030097,hemopoiesis;GO:0048856,anatomical structure development;GO:0030154,cell differentiation;GO:0007275,multicellular organismal d…	GO:0043229,intracellular organelle;GO:0031982,vesicle;GO:0070062,extracellular vesicular exosome;GO:0044464,cell part;GO:0043230,extracellular organelle;GO:0043227,membrane-bounded organelle;GO:0043232,intracellular non-membrane-bounded organelle;GO:0044421,extracellular region part;GO:0043231,intracellular membrane-bounded organelle;GO:0044424,intracellular part;GO:0005737,cytoplasm;GO:0005634,n…	GO:0043167,ion binding;GO:0043169,cation binding;GO:0046872,metal ion binding;GO:0005488,binding
47	sp|P13647|K2C5_HUMAN	Keratin, type II cytoskeletal 5 OS=Homo sapiens GN=KRT5 PE=1 SV=3	down	0.545385	0.000237203	cell proliferation;regulation of biological process;cellular component organization or biogenesis;negative regulation of biological process;developmental process;biological regulation;multicellular organismal process;cellular process	extracellular region part;extracellular region;organelle;macromolecular complex;cell part;cell;organelle part	structural molecule activity	Cytoskeleton ;		GO:0065007,biological regulation;GO:0048731,system development;GO:0009888,tissue development;GO:0050678,regulation of epithelial cell proliferation;GO:0008285,negative regulation of cell proliferation;GO:0007398,ectoderm development;GO:0009987,cellular process;GO:0031581,hemidesmosome assembly;GO:0044085,cellular component biogenesis;GO:0030154,cell differentiation;GO:0010926,anatomical structure…	GO:0043229,intracellular organelle;GO:0044446,intracellular organelle part;GO:0044444,cytoplasmic part;GO:0031982,vesicle;GO:0044422,organelle part;GO:0070062,extracellular vesicular exosome;GO:0044464,cell part;GO:0043230,extracellular organelle;GO:0043227,membrane-bounded organelle;GO:0045111,intermediate filament cytoskeleton;GO:0043232,intracellular non-membrane-bounded organelle;GO:0044421,e…	GO:0005198,structural molecule activity;GO:0005200,structural constituent of cytoskeleton
48	sp|P13224|GP1BB_HUMAN	Platelet glycoprotein Ib beta chain OS=Homo sapiens GN=GP1BB PE=1 SV=1	up	4.61684	0.0242538	response to stimulus;biological adhesion;regulation of biological process;metabolic process;biological regulation;multicellular organismal process;cellular process	cell part;cell	binding		ECM-receptor interaction;Hematopoietic cell lineage	GO:0065007,biological regulation;GO:0009605,response to external stimulus;GO:0006950,response to stress;GO:0032501,multicellular organismal process;GO:0050817,coagulation;GO:0050878,regulation of body fluid levels;GO:0022610,biological adhesion;GO:0042060,wound healing;GO:0009611,response to wounding;GO:0007596,blood coagulation;GO:0050789,regulation of biological process;GO:0030168,platelet acti…	GO:0044444,cytoplasmic part;GO:0044424,intracellular part;GO:0005737,cytoplasm;GO:0005623,cell;GO:0044425,membrane part;GO:0005622,intracellular;GO:0005886,plasma membrane;GO:0005887,integral to plasma membrane;GO:0044464,cell part;GO:0031224,intrinsic to membrane;GO:0016021,integral to membrane;GO:0044459,plasma membrane part;GO:0016020,membrane;GO:0031226,intrinsic to plasma membrane	GO:0042802,identical protein binding;GO:0005515,protein binding;GO:0005488,binding
49	sp|P05154|IPSP_HUMAN	Plasma serine protease inhibitor OS=Homo sapiens GN=SERPINA5 PE=1 SV=3	down	0.187429	0.0136515	reproductive process;reproduction;regulation of biological process;establishment of localization;cellular component organization or biogenesis;multicellular organismal process;cellular process;response to stimulus;localization;biological regulation;metabolic process	extracellular region part;extracellular region;organelle;cell part;cell;organelle part	enzyme regulator activity;binding	Posttranslational modification, protein turnover, chaperones ;	Complement and coagulation cascades	GO:0065007,biological regulation;GO:0009605,response to external stimulus;GO:0006950,response to stress;GO:0052548,regulation of endopeptidase activity;GO:0016044,membrane organization;GO:0048232,male gamete generation;GO:0065009,regulation of molecular function;GO:0043086,negative regulation of catalytic activity;GO:0007283,spermatogenesis;GO:0045026,plasma membrane fusion;GO:0006944,membrane fu…	GO:0044446,intracellular organelle part;GO:0031982,vesicle;GO:0044422,organelle part;GO:0070062,extracellular vesicular exosome;GO:0044464,cell part;GO:0043231,intracellular membrane-bounded organelle;GO:0005623,cell;GO:0030141,secretory granule;GO:0044425,membrane part;GO:0012505,endomembrane system;GO:0005576,extracellular region;GO:0009897,external side of plasma membrane;GO:0030659,cytoplasmi…	GO:0043169,cation binding;GO:0031210,phosphatidylcholine binding;GO:0008289,lipid binding;GO:0005515,protein binding;GO:0030247,polysaccharide binding;GO:0043167,ion binding;GO:0050997,quaternary ammonium group binding;GO:0004867,serine-type endopeptidase inhibitor activity;GO:0005543,phospholipid binding;GO:0043178,alcohol binding;GO:0019899,enzyme binding;GO:0030234,enzyme regulator activity;GO…
50	sp|Q9BWP8|COL11_HUMAN	Collectin-11 OS=Homo sapiens GN=COLEC11 PE=1 SV=1	up	1.58177	0.0122514	establishment of localization;cellular component organization or biogenesis;developmental process;localization;multicellular organismal process;cellular process	extracellular region part;extracellular region	binding		Phagosome	GO:0051234,establishment of localization;GO:0032502,developmental process;GO:0016192,vesicle-mediated transport;GO:0010324,membrane invagination;GO:0006898,receptor-mediated endocytosis;GO:0051179,localization;GO:0009987,cellular process;GO:0032501,multicellular organismal process;GO:0006810,transport;GO:0006897,endocytosis;GO:0016044,membrane organization;GO:0016043,cellular component organizati…	GO:0005576,extracellular region;GO:0005581,collagen;GO:0005578,proteinaceous extracellular matrix;GO:0044420,extracellular matrix part;GO:0031012,extracellular matrix;GO:0044421,extracellular region part	GO:0048029,monosaccharide binding;GO:0005537,mannose binding;GO:0005529,sugar binding;GO:0030246,carbohydrate binding;GO:0005488,binding
51	sp|Q04917|1433F_HUMAN	14-3-3 protein eta OS=Homo sapiens GN=YWHAH PE=1 SV=4	up	4.41261	0.0470314	regulation of biological process;establishment of localization;cellular component organization or biogenesis;positive regulation of biological process;developmental process;multicellular organismal process;cellular process;response to stimulus;signaling;negative regulation of biological process;localization;biological regulation;metabolic process;death	extracellular region part;extracellular region;organelle;cell part;cell;organelle part	enzyme regulator activity;binding;channel regulator activity;catalytic activity	Signal transduction mechanisms ;	Cell cycle;Neurotrophin signaling pathway;Oocyte meiosis;Pathogenic Escherichia coli infection	GO:0034960,cellular biopolymer metabolic process;GO:0010628,positive regulation of gene expression;GO:0022604,regulation of cell morphogenesis;GO:0045893,positive regulation of transcription, DNA-dependent;GO:0042221,response to chemical stimulus;GO:0048731,system development;GO:0031326,regulation of cellular biosynthetic process;GO:0000278,mitotic cell cycle;GO:0021536,diencephalon development;G…	GO:0044446,intracellular organelle part;GO:0014704,intercalated disc;GO:0043209,myelin sheath;GO:0031982,vesicle;GO:0044422,organelle part;GO:0070062,extracellular vesicular exosome;GO:0044464,cell part;GO:0005911,cell-cell junction;GO:0043231,intracellular membrane-bounded organelle;GO:0005739,mitochondrion;GO:0030055,cell-substrate junction;GO:0005623,cell;GO:0044425,membrane part;GO:0005912,ad…	GO:0019901,protein kinase binding;GO:0005515,protein binding;GO:0015457,auxiliary transport protein activity;GO:0003824,catalytic activity;GO:0019904,protein domain specific binding;GO:0005159,insulin-like growth factor receptor binding;GO:0019899,enzyme binding;GO:0016491,oxidoreductase activity;GO:0008426,protein kinase C inhibitor activity;GO:0017080,sodium channel regulator activity;GO:003023…
52	sp|P24592|IBP6_HUMAN	Insulin-like growth factor-binding protein 6 OS=Homo sapiens GN=IGFBP6 PE=1 SV=1	down	0.57414	0.0165637	cell proliferation;response to stimulus;regulation of biological process;signaling;negative regulation of biological process;metabolic process;biological regulation;cellular process	extracellular region part;extracellular region;organelle;cell part;cell	binding		p53 signaling pathway	GO:0065007,biological regulation;GO:0034960,cellular biopolymer metabolic process;GO:0044267,cellular protein metabolic process;GO:0048523,negative regulation of cellular process;GO:0044238,primary metabolic process;GO:0010646,regulation of cell communication;GO:0044237,cellular metabolic process;GO:0008285,negative regulation of cell proliferation;GO:0048519,negative regulation of biological pro…	GO:0043229,intracellular organelle;GO:0044444,cytoplasmic part;GO:0031982,vesicle;GO:0070062,extracellular vesicular exosome;GO:0044464,cell part;GO:0043230,extracellular organelle;GO:0005794,Golgi apparatus;GO:0043227,membrane-bounded organelle;GO:0044421,extracellular region part;GO:0005615,extracellular space;GO:0043231,intracellular membrane-bounded organelle;GO:0044424,intracellular part;GO:…	GO:0031995,insulin-like growth factor II binding;GO:0005515,protein binding;GO:0005520,insulin-like growth factor binding;GO:0031994,insulin-like growth factor I binding;GO:0005102,receptor binding;GO:0005488,binding;GO:0019838,growth factor binding
53	sp|P05090|APOD_HUMAN	Apolipoprotein D OS=Homo sapiens GN=APOD PE=1 SV=1	up	3.85475	0.00507446	developmental process;multicellular organismal process;cellular process;growth;signaling;negative regulation of biological process;metabolic process;biological regulation;immune system process;regulation of biological process;cellular component organization or biogenesis;establishment of localization;cell proliferation;biological adhesion;response to stimulus;localization;locomotion	extracellular region part;extracellular region;organelle;macromolecular complex;cell part;cell	transporter activity;binding	Cell wall/membrane/envelope biogenesis ;		GO:0065007,biological regulation;GO:0009605,response to external stimulus;GO:0031175,neuron projection development;GO:0050748,negative regulation of lipoprotein metabolic process;GO:0019318,hexose metabolic process;GO:0006950,response to stress;GO:0060341,regulation of cellular localization;GO:0042221,response to chemical stimulus;GO:0000902,cell morphogenesis;GO:0048731,system development;GO:004…	GO:0043229,intracellular organelle;GO:0030529,ribonucleoprotein complex;GO:0044444,cytoplasmic part;GO:0005783,endoplasmic reticulum;GO:0031982,vesicle;GO:0042995,cell projection;GO:0044445,cytosolic part;GO:0048471,perinuclear region of cytoplasm;GO:0043005,neuron projection;GO:0070062,extracellular vesicular exosome;GO:0044464,cell part;GO:0043230,extracellular organelle;GO:0043227,membrane-bou…	GO:0032934,sterol binding;GO:0015485,cholesterol binding;GO:0008289,lipid binding;GO:0005515,protein binding;GO:0005488,binding;GO:0005319,lipid transporter activity;GO:0005215,transporter activity;GO:0022892,substrate-specific transporter activity;GO:0005496,steroid binding
54	sp|P08779|K1C16_HUMAN	Keratin, type I cytoskeletal 16 OS=Homo sapiens GN=KRT16 PE=1 SV=4	down	0.237272	0.00288847	immune system process;regulation of biological process;cellular component organization or biogenesis;developmental process;multicellular organismal process;cellular process;cell proliferation;response to stimulus;negative regulation of biological process;localization;locomotion;biological regulation	extracellular region part;extracellular region;organelle;macromolecular complex;cell part;cell;organelle part	structural molecule activity		Staphylococcus aureus infection;Pathogenic Escherichia coli infection	GO:0065007,biological regulation;GO:0016477,cell migration;GO:0042303,molting cycle;GO:0048870,cell motility;GO:0009605,response to external stimulus;GO:0006950,response to stress;GO:0042221,response to chemical stimulus;GO:0031424,keratinization;GO:0048731,system development;GO:0009888,tissue development;GO:0007398,ectoderm development;GO:0040012,regulation of locomotion;GO:0010035,response to i…	GO:0043229,intracellular organelle;GO:0044446,intracellular organelle part;GO:0044444,cytoplasmic part;GO:0031982,vesicle;GO:0044422,organelle part;GO:0070062,extracellular vesicular exosome;GO:0044464,cell part;GO:0043230,extracellular organelle;GO:0043227,membrane-bounded organelle;GO:0045111,intermediate filament cytoskeleton;GO:0043232,intracellular non-membrane-bounded organelle;GO:0044421,e…	GO:0005198,structural molecule activity;GO:0005200,structural constituent of cytoskeleton
55	sp|P21333|FLNA_HUMAN	Filamin-A OS=Homo sapiens GN=FLNA PE=1 SV=4	up	4.61642	0.00096917	regulation of biological process;establishment of localization;cellular component organization or biogenesis;positive regulation of biological process;developmental process;multicellular organismal process;cellular process;response to stimulus;biological adhesion;signaling;negative regulation of biological process;localization;biological regulation;metabolic process;death	extracellular region part;organelle;cell part;membrane-enclosed lumen;extracellular region;cell;macromolecular complex;organelle part	molecular transducer activity;binding	Cytoskeleton ;	MAPK signaling pathway;Focal adhesion	GO:0009894,regulation of catabolic process;GO:0010740,positive regulation of protein kinase cascade;GO:0034960,cellular biopolymer metabolic process;GO:0010558,negative regulation of macromolecule biosynthetic process;GO:0060341,regulation of cellular localization;GO:0048731,system development;GO:0002576,platelet degranulation;GO:0031326,regulation of cellular biosynthetic process;GO:0050821,prot…	GO:0044446,intracellular organelle part;GO:0005938,cell cortex;GO:0044431,Golgi apparatus part;GO:0031981,nuclear lumen;GO:0031982,vesicle;GO:0044422,organelle part;GO:0043233,organelle lumen;GO:0070062,extracellular vesicular exosome;GO:0044464,cell part;GO:0044463,cell projection part;GO:0005794,Golgi apparatus;GO:0043232,intracellular non-membrane-bounded organelle;GO:0043231,intracellular mem…	GO:0019901,protein kinase binding;GO:0042803,protein homodimerization activity;GO:0005515,protein binding;GO:0060089,molecular transducer activity;GO:0004871,signal transducer activity;GO:0019899,enzyme binding;GO:0019900,kinase binding;GO:0051015,actin filament binding;GO:0005080,protein kinase C binding;GO:0042802,identical protein binding;GO:0001948,glycoprotein binding;GO:0001664,G-protein-co…
56	sp|P60709|ACTB_HUMAN	Actin, cytoplasmic 1 OS=Homo sapiens GN=ACTB PE=1 SV=1	up	2.87776	0.00970496	immune system process;regulation of biological process;cellular component organization or biogenesis;positive regulation of biological process;developmental process;multicellular organismal process;cellular process;response to stimulus;biological adhesion;signaling;locomotion;biological regulation;metabolic process	synapse part;extracellular region part;organelle;cell part;membrane-enclosed lumen;synapse;extracellular region;cell;macromolecular complex;organelle part	structural molecule activity;binding	Cytoskeleton ;	Regulation of actin cytoskeleton;Viral myocarditis;Focal adhesion;Phototransduction - fly;Leukocyte transendothelial migration;Phagosome;Adherens junction;Gastric acid secretion;Shigellosis;Arrhythmogenic right ventricular cardiomyopathy (ARVC);Tight junction;Hypertrophic cardiomyopathy (HCM);Pathogenic Escherichia coli infection;Dilated cardiomyopathy;Bacterial invasion of epithelial cells;Vibri…	GO:0065007,biological regulation;GO:0034960,cellular biopolymer metabolic process;GO:0010628,positive regulation of gene expression;GO:0009605,response to external stimulus;GO:0031175,neuron projection development;GO:0007167,enzyme linked receptor protein signaling pathway;GO:0006950,response to stress;GO:0000902,cell morphogenesis;GO:0048731,system development;GO:0070527,platelet aggregation;GO:…	GO:0044446,intracellular organelle part;GO:0005938,cell cortex;GO:0044456,synapse part;GO:0043209,myelin sheath;GO:0031981,nuclear lumen;GO:0031982,vesicle;GO:0044422,organelle part;GO:0043233,organelle lumen;GO:0070062,extracellular vesicular exosome;GO:0044464,cell part;GO:0005654,nucleoplasm;GO:0000228,nuclear chromosome;GO:0043232,intracellular non-membrane-bounded organelle;GO:0043231,intrac…	GO:0032553,ribonucleotide binding;GO:0001883,purine nucleoside binding;GO:0019901,protein kinase binding;GO:0005515,protein binding;GO:0043566,structure-specific DNA binding;GO:0031490,chromatin DNA binding;GO:0019899,enzyme binding;GO:0003682,chromatin binding;GO:0032559,adenyl ribonucleotide binding;GO:0019900,kinase binding;GO:0003677,DNA binding;GO:0003676,nucleic acid binding;GO:0032555,puri…
57	sp|P55056|APOC4_HUMAN	Apolipoprotein C-IV OS=Homo sapiens GN=APOC4 PE=1 SV=1	up	1.80652	0.036151	regulation of biological process;establishment of localization;positive regulation of biological process;localization;metabolic process;biological regulation	extracellular region part;extracellular region;macromolecular complex	transporter activity			GO:0065007,biological regulation;GO:0048878,chemical homeostasis;GO:0010883,regulation of lipid storage;GO:0032879,regulation of localization;GO:0044238,primary metabolic process;GO:0055088,lipid homeostasis;GO:0006869,lipid transport;GO:0042592,homeostatic process;GO:0008152,metabolic process;GO:0051234,establishment of localization;GO:0006629,lipid metabolic process;GO:0050789,regulation of bio…	GO:0005615,extracellular space;GO:0032994,protein-lipid complex;GO:0032991,macromolecular complex;GO:0034361,very-low-density lipoprotein particle;GO:0034364,high-density lipoprotein particle;GO:0034358,plasma lipoprotein particle;GO:0005576,extracellular region;GO:0034385,triglyceride-rich lipoprotein particle;GO:0044421,extracellular region part	GO:0005319,lipid transporter activity;GO:0022892,substrate-specific transporter activity;GO:0005215,transporter activity
58	sp|P02765|FETUA_HUMAN	Alpha-2-HS-glycoprotein OS=Homo sapiens GN=AHSG PE=1 SV=1	down	0.133877	0.00189316	regulation of biological process;establishment of localization;cellular component organization or biogenesis;positive regulation of biological process;developmental process;multicellular organismal process;cellular process;response to stimulus;signaling;negative regulation of biological process;localization;biological regulation;metabolic process	extracellular region part;extracellular region;organelle;cell part;cell	enzyme regulator activity;binding			GO:0065007,biological regulation;GO:0050793,regulation of developmental process;GO:0009605,response to external stimulus;GO:0031347,regulation of defense response;GO:0006950,response to stress;GO:0048731,system development;GO:0052548,regulation of endopeptidase activity;GO:0070168,negative regulation of biomineral formation;GO:0031324,negative regulation of cellular metabolic process;GO:0051239,r…	GO:0005623,cell;GO:0031982,vesicle;GO:0043226,organelle;GO:0031012,extracellular matrix;GO:0005886,plasma membrane;GO:0005576,extracellular region;GO:0070062,extracellular vesicular exosome;GO:0044464,cell part;GO:0043230,extracellular organelle;GO:0065010,extracellular membrane-bounded organelle;GO:0031988,membrane-bounded vesicle;GO:0043227,membrane-bounded organelle;GO:0016020,membrane;GO:0044…	GO:0019207,kinase regulator activity;GO:0005515,protein binding;GO:0004869,cysteine-type endopeptidase inhibitor activity;GO:0030414,peptidase inhibitor activity;GO:0004866,endopeptidase inhibitor activity;GO:0030234,enzyme regulator activity;GO:0019210,kinase inhibitor activity;GO:0004857,enzyme inhibitor activity;GO:0005488,binding
59	sp|P02749|APOH_HUMAN	Beta-2-glycoprotein 1 OS=Homo sapiens GN=APOH PE=1 SV=3	up	2.93735	0.0257503	regulation of biological process;establishment of localization;positive regulation of biological process;developmental process;multicellular organismal process;cellular process;cell proliferation;response to stimulus;negative regulation of biological process;localization;locomotion;metabolic process;biological regulation;death	extracellular region part;extracellular region;organelle;macromolecular complex;cell part;cell	enzyme regulator activity;binding		Cell adhesion molecules (CAMs);Complement and coagulation cascades;Malaria	GO:0009894,regulation of catabolic process;GO:0065007,biological regulation;GO:0050793,regulation of developmental process;GO:0009605,response to external stimulus;GO:0006950,response to stress;GO:0042221,response to chemical stimulus;GO:0034014,response to triglyceride;GO:0048731,system development;GO:0051239,regulation of multicellular organismal process;GO:0009892,negative regulation of metabo…	GO:0032994,protein-lipid complex;GO:0034361,very-low-density lipoprotein particle;GO:0031982,vesicle;GO:0070062,extracellular vesicular exosome;GO:0044464,cell part;GO:0043230,extracellular organelle;GO:0043227,membrane-bounded organelle;GO:0034385,triglyceride-rich lipoprotein particle;GO:0044421,extracellular region part;GO:0005615,extracellular space;GO:0044424,intracellular part;GO:0005737,cy…	GO:0001948,glycoprotein binding;GO:0008289,lipid binding;GO:0042802,identical protein binding;GO:0005515,protein binding;GO:0030247,polysaccharide binding;GO:0005488,binding;GO:0005543,phospholipid binding;GO:0008201,heparin binding;GO:0008047,enzyme activator activity;GO:0030234,enzyme regulator activity;GO:0030246,carbohydrate binding;GO:0005539,glycosaminoglycan binding;GO:0001871,pattern bind…
60	sp|P01780|HV307_HUMAN	Immunoglobulin heavy variable 3-7 OS=Homo sapiens GN=IGHV3-7 PE=1 SV=2	up	2.25838	0.00836661					Fc epsilon RI signaling pathway;Viral myocarditis;Primary immunodeficiency;Staphylococcus aureus infection;Natural killer cell mediated cytotoxicity;Hematopoietic cell lineage;Asthma;Leishmaniasis;Phagosome;Systemic lupus erythematosus;Fc gamma R-mediated phagocytosis;Allograft rejection;B cell receptor signaling pathway;Dilated cardiomyopathy;Autoimmune thyroid disease;Intestinal immune network …
61	sp|P02775|CXCL7_HUMAN	Platelet basic protein OS=Homo sapiens GN=PPBP PE=1 SV=3	up	3.07498	0.00567431	immune system process;regulation of biological process;multi-organism process;establishment of localization;positive regulation of biological process;multicellular organismal process;cellular process;cell killing;cell proliferation;response to stimulus;signaling;localization;locomotion;biological regulation	extracellular region part;extracellular region;organelle;cell part;cell;organelle part;membrane-enclosed lumen	transporter activity;binding		Chemokine signaling pathway;Cytokine-cytokine receptor interaction	GO:0065007,biological regulation;GO:0016477,cell migration;GO:0048870,cell motility;GO:0009617,response to bacterium;GO:0009605,response to external stimulus;GO:0060326,cell chemotaxis;GO:0002237,response to molecule of bacterial origin;GO:0006950,response to stress;GO:0042221,response to chemical stimulus;GO:0045321,leukocyte activation;GO:0002576,platelet degranulation;GO:0048584,positive regul…	GO:0043229,intracellular organelle;GO:0044446,intracellular organelle part;GO:0044444,cytoplasmic part;GO:0031091,platelet alpha granule;GO:0031982,vesicle;GO:0044422,organelle part;GO:0043233,organelle lumen;GO:0044433,cytoplasmic vesicle part;GO:0044464,cell part;GO:0060205,cytoplasmic membrane-bounded vesicle lumen;GO:0043227,membrane-bounded organelle;GO:0044421,extracellular region part;GO:0…	GO:0005515,protein binding;GO:0008083,growth factor activity;GO:0001664,G-protein-coupled receptor binding;GO:0005125,cytokine activity;GO:0005488,binding;GO:0008009,chemokine activity;GO:0045236,CXCR chemokine receptor binding;GO:0005215,transporter activity;GO:0022892,substrate-specific transporter activity;GO:0022857,transmembrane transporter activity;GO:0005102,receptor binding;GO:0042379,che…
62	sp|P08514|ITA2B_HUMAN	Integrin alpha-IIb OS=Homo sapiens GN=ITGA2B PE=1 SV=3	up	3.50088	0.00123657	immune system process;regulation of biological process;establishment of localization;cellular component organization or biogenesis;positive regulation of biological process;developmental process;multicellular organismal process;cellular process;response to stimulus;biological adhesion;signaling;localization;locomotion;biological regulation	extracellular region part;extracellular region;organelle;macromolecular complex;cell part;cell;organelle part	binding		Small cell lung cancer;Regulation of actin cytoskeleton;ECM-receptor interaction;Arrhythmogenic right ventricular cardiomyopathy (ARVC);Dilated cardiomyopathy;Hematopoietic cell lineage;Focal adhesion;Pathways in cancer;Hypertrophic cardiomyopathy (HCM)	GO:0065007,biological regulation;GO:0007160,cell-matrix adhesion;GO:0009605,response to external stimulus;GO:0031175,neuron projection development;GO:0006950,response to stress;GO:0000902,cell morphogenesis;GO:0048731,system development;GO:0002576,platelet degranulation;GO:0070527,platelet aggregation;GO:0032940,secretion by cell;GO:0000904,cell morphogenesis involved in differentiation;GO:000715…	GO:0044446,intracellular organelle part;GO:0031982,vesicle;GO:0044422,organelle part;GO:0070062,extracellular vesicular exosome;GO:0044464,cell part;GO:0043231,intracellular membrane-bounded organelle;GO:0030055,cell-substrate junction;GO:0005623,cell;GO:0030141,secretory granule;GO:0044425,membrane part;GO:0005912,adherens junction;GO:0012505,endomembrane system;GO:0005576,extracellular region;G…	GO:0043169,cation binding;GO:0046872,metal ion binding;GO:0032403,protein complex binding;GO:0042802,identical protein binding;GO:0005515,protein binding;GO:0050840,extracellular matrix binding;GO:0005488,binding;GO:0070051,fibrinogen binding;GO:0043167,ion binding
63	sp|P23142|FBLN1_HUMAN	Fibulin-1 OS=Homo sapiens GN=FBLN1 PE=1 SV=4	up	1.97733	0.00368456	reproductive process;reproduction;regulation of biological process;multi-organism process;cellular component organization or biogenesis;positive regulation of biological process;developmental process;multicellular organismal process;cellular process;cell proliferation;response to stimulus;signaling;negative regulation of biological process;localization;locomotion;biological regulation;metabolic p…	extracellular region part;extracellular region;organelle;macromolecular complex	enzyme regulator activity;structural molecule activity;binding		TGF-beta signaling pathway	GO:0065007,biological regulation;GO:0060255,regulation of macromolecule metabolic process;GO:0010627,regulation of protein kinase cascade;GO:0010628,positive regulation of gene expression;GO:0043062,extracellular structure organization;GO:0007154,cell communication;GO:0009966,regulation of signal transduction;GO:0065009,regulation of molecular function;GO:0007565,female pregnancy;GO:0048522,posit…	GO:0005577,fibrinogen complex;GO:0031982,vesicle;GO:0070062,extracellular vesicular exosome;GO:0043230,extracellular organelle;GO:0043227,membrane-bounded organelle;GO:0044420,extracellular matrix part;GO:0044421,extracellular region part;GO:0005615,extracellular space;GO:0043234,protein complex;GO:0005578,proteinaceous extracellular matrix;GO:0032991,macromolecular complex;GO:0043226,organelle;G…	GO:0043169,cation binding;GO:0005178,integrin binding;GO:0001968,fibronectin binding;GO:0032403,protein complex binding;GO:0005515,protein binding;GO:0005201,extracellular matrix structural constituent;GO:0043167,ion binding;GO:0008047,enzyme activator activity;GO:0030234,enzyme regulator activity;GO:0046872,metal ion binding;GO:0042802,identical protein binding;GO:0016504,peptidase activator act…
64	sp|P07358|CO8B_HUMAN	Complement component C8 beta chain OS=Homo sapiens GN=C8B PE=1 SV=3	down	0.324753	0.00522999	immune system process;regulation of biological process;positive regulation of biological process;cellular process;response to stimulus;biological regulation;metabolic process;death	extracellular region part;extracellular region;organelle;macromolecular complex;cell part;cell	binding		Complement and coagulation cascades;Systemic lupus erythematosus;Prion diseases;Amoebiasis	GO:0009894,regulation of catabolic process;GO:0002673,regulation of acute inflammatory response;GO:0065007,biological regulation;GO:0009605,response to external stimulus;GO:0031347,regulation of defense response;GO:0006950,response to stress;GO:0048584,positive regulation of response to stimulus;GO:0002252,immune effector process;GO:0030449,regulation of complement activation;GO:0043283,biopolyme…	GO:0031982,vesicle;GO:0070062,extracellular vesicular exosome;GO:0044464,cell part;GO:0043230,extracellular organelle;GO:0016021,integral to membrane;GO:0043227,membrane-bounded organelle;GO:0044421,extracellular region part;GO:0005615,extracellular space;GO:0043234,protein complex;GO:0005623,cell;GO:0032991,macromolecular complex;GO:0044425,membrane part;GO:0005579,membrane attack complex;GO:004…	GO:0032403,protein complex binding;GO:0005515,protein binding;GO:0005488,binding
65	sp|P00450|CERU_HUMAN	Ceruloplasmin OS=Homo sapiens GN=CP PE=1 SV=1	down	0.132474	7.43e-05	response to stimulus;establishment of localization;developmental process;localization;metabolic process;biological regulation;multicellular organismal process;cellular process	extracellular region part;extracellular region;organelle;cell part;cell;organelle part	binding;catalytic activity	Secondary metabolites biosynthesis, transport and catabolism ;	Porphyrin and chlorophyll metabolism	GO:0065007,biological regulation;GO:0050801,ion homeostasis;GO:0031667,response to nutrient levels;GO:0009605,response to external stimulus;GO:0042221,response to chemical stimulus;GO:0048731,system development;GO:0019725,cellular homeostasis;GO:0042592,homeostatic process;GO:0030003,cellular cation homeostasis;GO:0010035,response to inorganic substance;GO:0007568,aging;GO:0055114,oxidation reduc…	GO:0044446,intracellular organelle part;GO:0005765,lysosomal membrane;GO:0031982,vesicle;GO:0005764,lysosome;GO:0044422,organelle part;GO:0031225,anchored to membrane;GO:0070062,extracellular vesicular exosome;GO:0044464,cell part;GO:0043231,intracellular membrane-bounded organelle;GO:0005623,cell;GO:0044425,membrane part;GO:0005576,extracellular region;GO:0065010,extracellular membrane-bounded o…	GO:0043169,cation binding;GO:0046872,metal ion binding;GO:0005515,protein binding;GO:0005507,copper ion binding;GO:0003824,catalytic activity;GO:0005488,binding;GO:0046914,transition metal ion binding;GO:0043167,ion binding;GO:0016491,oxidoreductase activity;GO:0051087,chaperone binding
66	sp|P09486|SPRC_HUMAN	SPARC OS=Homo sapiens GN=SPARC PE=1 SV=1	up	4.12369	0.0241742	regulation of biological process;multi-organism process;establishment of localization;cellular component organization or biogenesis;positive regulation of biological process;developmental process;multicellular organismal process;cellular process;cell proliferation;response to stimulus;signaling;negative regulation of biological process;localization;locomotion;biological regulation	extracellular region part;extracellular region;organelle;cell part;cell;organelle part;membrane-enclosed lumen	binding			GO:0048839,inner ear development;GO:0065007,biological regulation;GO:0050793,regulation of developmental process;GO:0009617,response to bacterium;GO:0009605,response to external stimulus;GO:0022604,regulation of cell morphogenesis;GO:0002237,response to molecule of bacterial origin;GO:0006950,response to stress;GO:0042221,response to chemical stimulus;GO:0048731,system development;GO:0002576,plat…	GO:0044446,intracellular organelle part;GO:0031981,nuclear lumen;GO:0031982,vesicle;GO:0044422,organelle part;GO:0043233,organelle lumen;GO:0044464,cell part;GO:0044420,extracellular matrix part;GO:0043231,intracellular membrane-bounded organelle;GO:0005739,mitochondrion;GO:0031974,membrane-enclosed lumen;GO:0005623,cell;GO:0005634,nucleus;GO:0030141,secretory granule;GO:0012505,endomembrane syst…	GO:0043167,ion binding;GO:0043169,cation binding;GO:0046872,metal ion binding;GO:0005509,calcium ion binding;GO:0005515,protein binding;GO:0005518,collagen binding;GO:0050840,extracellular matrix binding;GO:0005488,binding
67	sp|A0A0A0MS15|HV349_HUMAN	Immunoglobulin heavy variable 3-49 OS=Homo sapiens GN=IGHV3-49 PE=1 SV=1	up	5.47478	0.0228707					Fc epsilon RI signaling pathway;Viral myocarditis;Primary immunodeficiency;Staphylococcus aureus infection;Natural killer cell mediated cytotoxicity;Hematopoietic cell lineage;Asthma;Leishmaniasis;Phagosome;Systemic lupus erythematosus;Fc gamma R-mediated phagocytosis;Allograft rejection;B cell receptor signaling pathway;Dilated cardiomyopathy;Autoimmune thyroid disease;Intestinal immune network …
68	sp|P80108|PHLD_HUMAN	Phosphatidylinositol-glycan-specific phospholipase D OS=Homo sapiens GN=GPLD1 PE=1 SV=3	down	0.341288	0.00348052	immune system process;regulation of biological process;establishment of localization;positive regulation of biological process;developmental process;multicellular organismal process;cellular process;cell proliferation;response to stimulus;signaling;negative regulation of biological process;localization;locomotion;metabolic process;biological regulation;death	extracellular region part;extracellular region;organelle;macromolecular complex;cell part;cell;organelle part	binding;channel regulator activity;catalytic activity		Glycosylphosphatidylinositol(GPI)-anchor biosynthesis	GO:0009894,regulation of catabolic process;GO:0016477,cell migration;GO:0042221,response to chemical stimulus;GO:0035303,regulation of dephosphorylation;GO:0048731,system development;GO:0031326,regulation of cellular biosynthetic process;GO:0009892,negative regulation of metabolic process;GO:0008285,negative regulation of cell proliferation;GO:0040012,regulation of locomotion;GO:0009725,response …	GO:0044446,intracellular organelle part;GO:0005765,lysosomal membrane;GO:0032994,protein-lipid complex;GO:0031982,vesicle;GO:0005764,lysosome;GO:0044422,organelle part;GO:0070062,extracellular vesicular exosome;GO:0044464,cell part;GO:0043231,intracellular membrane-bounded organelle;GO:0005623,cell;GO:0034364,high-density lipoprotein particle;GO:0005576,extracellular region;GO:0065010,extracellul…	GO:0004620,phospholipase activity;GO:0005515,protein binding;GO:0015457,auxiliary transport protein activity;GO:0003824,catalytic activity;GO:0042578,phosphoric ester hydrolase activity;GO:0005488,binding;GO:0016788,hydrolase activity, acting on ester bonds;GO:0017080,sodium channel regulator activity;GO:0016247,channel regulator activity;GO:0016298,lipase activity;GO:0016787,hydrolase activity
69	sp|P62258|1433E_HUMAN	14-3-3 protein epsilon OS=Homo sapiens GN=YWHAE PE=1 SV=1	up	2.13576	0.0490055	regulation of biological process;establishment of localization;developmental process;multicellular organismal process;cellular process;response to stimulus;signaling;viral reproduction;negative regulation of biological process;localization;locomotion;biological regulation;metabolic process;death	extracellular region part;extracellular region;organelle;macromolecular complex;cell part;cell;organelle part	enzyme regulator activity;binding;channel regulator activity;catalytic activity	Signal transduction mechanisms ;	Cell cycle;Neurotrophin signaling pathway;Oocyte meiosis;Pathogenic Escherichia coli infection	GO:0065007,biological regulation;GO:0050801,ion homeostasis;GO:0016477,cell migration;GO:0034960,cellular biopolymer metabolic process;GO:0050793,regulation of developmental process;GO:0048870,cell motility;GO:0007167,enzyme linked receptor protein signaling pathway;GO:0048731,system development;GO:0052548,regulation of endopeptidase activity;GO:0019725,cellular homeostasis;GO:0000278,mitotic cel…	GO:0044446,intracellular organelle part;GO:0031982,vesicle;GO:0044422,organelle part;GO:0070062,extracellular vesicular exosome;GO:0044464,cell part;GO:0043232,intracellular non-membrane-bounded organelle;GO:0043231,intracellular membrane-bounded organelle;GO:0005739,mitochondrion;GO:0030055,cell-substrate junction;GO:0005623,cell;GO:0044425,membrane part;GO:0005912,adherens junction;GO:0012505,e…	GO:0005515,protein binding;GO:0015457,auxiliary transport protein activity;GO:0003824,catalytic activity;GO:0019904,protein domain specific binding;GO:0019899,enzyme binding;GO:0016491,oxidoreductase activity;GO:0008426,protein kinase C inhibitor activity;GO:0030234,enzyme regulator activity;GO:0031625,ubiquitin protein ligase binding;GO:0004857,enzyme inhibitor activity;GO:0043176,amine binding;…
70	sp|P51884|LUM_HUMAN	Lumican OS=Homo sapiens GN=LUM PE=1 SV=2	down	0.310588	0.0116732	response to stimulus;regulation of biological process;cellular component organization or biogenesis;positive regulation of biological process;developmental process;metabolic process;biological regulation;multicellular organismal process;cellular process	extracellular region part;extracellular region;organelle;cell part;cell;organelle part;membrane-enclosed lumen	structural molecule activity;binding	Function unknown ;		GO:0065007,biological regulation;GO:0010628,positive regulation of gene expression;GO:0031175,neuron projection development;GO:0045893,positive regulation of transcription, DNA-dependent;GO:0042221,response to chemical stimulus;GO:0000902,cell morphogenesis;GO:0048731,system development;GO:0031326,regulation of cellular biosynthetic process;GO:0009888,tissue development;GO:0032908,regulation of t…	GO:0044446,intracellular organelle part;GO:0044431,Golgi apparatus part;GO:0031982,vesicle;GO:0005764,lysosome;GO:0044422,organelle part;GO:0043233,organelle lumen;GO:0070062,extracellular vesicular exosome;GO:0005581,collagen;GO:0044464,cell part;GO:0005794,Golgi apparatus;GO:0044420,extracellular matrix part;GO:0005796,Golgi lumen;GO:0043231,intracellular membrane-bounded organelle;GO:0031974,m…	GO:0005198,structural molecule activity;GO:0005515,protein binding;GO:0005518,collagen binding;GO:0005488,binding;GO:0005201,extracellular matrix structural constituent
71	sp|P04264|K2C1_HUMAN	Keratin, type II cytoskeletal 1 OS=Homo sapiens GN=KRT1 PE=1 SV=6	down	0.384855	0.0015757	immune system process;regulation of biological process;positive regulation of biological process;developmental process;multicellular organismal process;response to stimulus;negative regulation of biological process;biological regulation;metabolic process	extracellular region part;extracellular region;organelle;macromolecular complex;cell part;cell;organelle part	molecular transducer activity;structural molecule activity;binding	Cytoskeleton ;		GO:0065007,biological regulation;GO:0048583,regulation of response to stimulus;GO:0032102,negative regulation of response to external stimulus;GO:0050793,regulation of developmental process;GO:0009605,response to external stimulus;GO:0031347,regulation of defense response;GO:0006950,response to stress;GO:0042221,response to chemical stimulus;GO:0044238,primary metabolic process;GO:0080134,regulat…	GO:0043229,intracellular organelle;GO:0044446,intracellular organelle part;GO:0031982,vesicle;GO:0044422,organelle part;GO:0070062,extracellular vesicular exosome;GO:0044464,cell part;GO:0043230,extracellular organelle;GO:0043227,membrane-bounded organelle;GO:0045111,intermediate filament cytoskeleton;GO:0043232,intracellular non-membrane-bounded organelle;GO:0044421,extracellular region part;GO:…	GO:0005198,structural molecule activity;GO:0060089,molecular transducer activity;GO:0004871,signal transducer activity;GO:0004872,receptor activity;GO:0005515,protein binding;GO:0030246,carbohydrate binding;GO:0005488,binding
72	sp|P04180|LCAT_HUMAN	Phosphatidylcholine-sterol acyltransferase OS=Homo sapiens GN=LCAT PE=1 SV=1	down	0.599091	0.00720109	response to stimulus;regulation of biological process;establishment of localization;cellular component organization or biogenesis;localization;metabolic process;biological regulation;multicellular organismal process;cellular process	extracellular region part;extracellular region;organelle;macromolecular complex;cell part;cell	binding;catalytic activity		Limonene and pinene degradation;Glycerophospholipid metabolism;Microbial metabolism in diverse environments;Tyrosine metabolism	GO:0065007,biological regulation;GO:0006576,biogenic amine metabolic process;GO:0019637,organophosphate metabolic process;GO:0042221,response to chemical stimulus;GO:0009719,response to endogenous stimulus;GO:0042592,homeostatic process;GO:0043170,macromolecule metabolic process;GO:0009725,response to hormone stimulus;GO:0042439,ethanolamine and derivative metabolic process;GO:0010035,response to…	GO:0032994,protein-lipid complex;GO:0031982,vesicle;GO:0070062,extracellular vesicular exosome;GO:0044464,cell part;GO:0043230,extracellular organelle;GO:0016021,integral to membrane;GO:0043227,membrane-bounded organelle;GO:0044421,extracellular region part;GO:0005615,extracellular space;GO:0005623,cell;GO:0034364,high-density lipoprotein particle;GO:0032991,macromolecular complex;GO:0044425,memb…	GO:0004620,phospholipase activity;GO:0005515,protein binding;GO:0003824,catalytic activity;GO:0005488,binding;GO:0016788,hydrolase activity, acting on ester bonds;GO:0016740,transferase activity;GO:0016298,lipase activity;GO:0004091,carboxylesterase activity;GO:0016787,hydrolase activity
73	sp|P12814|ACTN1_HUMAN	Alpha-actinin-1 OS=Homo sapiens GN=ACTN1 PE=1 SV=2	up	2.21018	0.0141943	immune system process;regulation of biological process;establishment of localization;cellular component organization or biogenesis;developmental process;multicellular organismal process;cellular process;response to stimulus;biological adhesion;signaling;negative regulation of biological process;localization;metabolic process;biological regulation;death	extracellular region part;organelle;cell part;membrane-enclosed lumen;extracellular region;cell;macromolecular complex;organelle part	protein binding transcription factor activity;binding	Signal transduction mechanisms ; Cytoskeleton ; Cell cycle control, cell division, chromosome partitioning ; General function prediction only ;Cytoskeleton ;	Adherens junction;Regulation of actin cytoskeleton;Arrhythmogenic right ventricular cardiomyopathy (ARVC);Tight junction;Focal adhesion;Systemic lupus erythematosus;Leukocyte transendothelial migration;Amoebiasis	GO:0065007,biological regulation;GO:0007160,cell-matrix adhesion;GO:0007517,muscle organ development;GO:0048747,muscle fiber development;GO:0050793,regulation of developmental process;GO:0009605,response to external stimulus;GO:0048534,hemopoietic or lymphoid organ development;GO:0006950,response to stress;GO:0060341,regulation of cellular localization;GO:0048731,system development;GO:0002576,pla…	GO:0044446,intracellular organelle part;GO:0001725,stress fiber;GO:0031982,vesicle;GO:0044464,cell part;GO:0005911,cell-cell junction;GO:0043232,intracellular non-membrane-bounded organelle;GO:0043231,intracellular membrane-bounded organelle;GO:0030055,cell-substrate junction;GO:0030141,secretory granule;GO:0005912,adherens junction;GO:0012505,endomembrane system;GO:0030659,cytoplasmic vesicle me…	GO:0043169,cation binding;GO:0042803,protein homodimerization activity;GO:0005178,integrin binding;GO:0032403,protein complex binding;GO:0005515,protein binding;GO:0017166,vinculin binding;GO:0019904,protein domain specific binding;GO:0043167,ion binding;GO:0051015,actin filament binding;GO:0003676,nucleic acid binding;GO:0046872,metal ion binding;GO:0042802,identical protein binding;GO:0003723,R…
74	sp|P05160|F13B_HUMAN	Coagulation factor XIII B chain OS=Homo sapiens GN=F13B PE=1 SV=3	down	0.500408	0.0247776	response to stimulus;biological regulation;multicellular organismal process	extracellular region			Complement and coagulation cascades	GO:0065007,biological regulation;GO:0042060,wound healing;GO:0007596,blood coagulation;GO:0009605,response to external stimulus;GO:0009611,response to wounding;GO:0006950,response to stress;GO:0007599,hemostasis;GO:0032501,multicellular organismal process;GO:0050896,response to stimulus;GO:0050817,coagulation;GO:0065008,regulation of biological quality;GO:0050878,regulation of body fluid levels	GO:0005576,extracellular region
75	sp|P06727|APOA4_HUMAN	Apolipoprotein A-IV OS=Homo sapiens GN=APOA4 PE=1 SV=3	down	0.37739	0.00997069	immune system process;regulation of biological process;establishment of localization;cellular component organization or biogenesis;positive regulation of biological process;developmental process;multicellular organismal process;cellular process;response to stimulus;biological adhesion;signaling;negative regulation of biological process;localization;biological regulation;metabolic process	extracellular region part;organelle;cell part;membrane-enclosed lumen;extracellular region;cell;macromolecular complex;organelle part	enzyme regulator activity;transporter activity;binding;antioxidant activity			GO:0009894,regulation of catabolic process;GO:0034960,cellular biopolymer metabolic process;GO:0050748,negative regulation of lipoprotein metabolic process;GO:0042221,response to chemical stimulus;GO:0034014,response to triglyceride;GO:0048731,system development;GO:0009416,response to light stimulus;GO:0031326,regulation of cellular biosynthetic process;GO:0051239,regulation of multicellular orga…	GO:0044446,intracellular organelle part;GO:0032994,protein-lipid complex;GO:0031982,vesicle;GO:0044422,organelle part;GO:0043233,organelle lumen;GO:0070062,extracellular vesicular exosome;GO:0044464,cell part;GO:0043231,intracellular membrane-bounded organelle;GO:0031974,membrane-enclosed lumen;GO:0005623,cell;GO:0034364,high-density lipoprotein particle;GO:0005576,extracellular region;GO:0065010…	GO:0043169,cation binding;GO:0031210,phosphatidylcholine binding;GO:0042803,protein homodimerization activity;GO:0008289,lipid binding;GO:0005515,protein binding;GO:0005507,copper ion binding;GO:0046914,transition metal ion binding;GO:0043167,ion binding;GO:0050997,quaternary ammonium group binding;GO:0016209,antioxidant activity;GO:0043178,alcohol binding;GO:0005543,phospholipid binding;GO:00080…
76	sp|Q15404|RSU1_HUMAN	Ras suppressor protein 1 OS=Homo sapiens GN=RSU1 PE=1 SV=3	up	1.84761	0.0120426	regulation of biological process;cellular component organization or biogenesis;positive regulation of biological process;cellular process;cell proliferation;biological adhesion;response to stimulus;signaling;biological regulation;metabolic process	extracellular region part;extracellular region;organelle;cell part;cell	binding	Function unknown ;	NOD-like receptor signaling pathway	GO:0065007,biological regulation;GO:0010926,anatomical structure formation;GO:0007242,intracellular signaling cascade;GO:0050790,regulation of catalytic activity;GO:0051345,positive regulation of hydrolase activity;GO:0034330,cell junction organization;GO:0007264,small GTPase mediated signal transduction;GO:0007154,cell communication;GO:0034329,cell junction assembly;GO:0044093,positive regulatio…	GO:0044444,cytoplasmic part;GO:0031982,vesicle;GO:0070062,extracellular vesicular exosome;GO:0044464,cell part;GO:0005924,cell-substrate adherens junction;GO:0043230,extracellular organelle;GO:0070161,anchoring junction;GO:0043227,membrane-bounded organelle;GO:0044421,extracellular region part;GO:0044424,intracellular part;GO:0005925,focal adhesion;GO:0030055,cell-substrate junction;GO:0005737,cy…	GO:0005515,protein binding;GO:0005488,binding
77	sp|Q86UX7|URP2_HUMAN	Fermitin family homolog 3 OS=Homo sapiens GN=FERMT3 PE=1 SV=1	up	1.82454	0.0031313	regulation of biological process;cellular component organization or biogenesis;positive regulation of biological process;developmental process;multicellular organismal process;cellular process;response to stimulus;biological adhesion;signaling;localization;locomotion;biological regulation	extracellular region part;extracellular region;organelle;macromolecular complex;cell part;cell;organelle part	binding		Focal adhesion	GO:0065007,biological regulation;GO:0034960,cellular biopolymer metabolic process;GO:0034109,homotypic cell-cell adhesion;GO:0009605,response to external stimulus;GO:0006950,response to stress;GO:0000902,cell morphogenesis;GO:0044238,primary metabolic process;GO:0070527,platelet aggregation;GO:0000904,cell morphogenesis involved in differentiation;GO:0007154,cell communication;GO:0043283,biopolym…	GO:0043229,intracellular organelle;GO:0044446,intracellular organelle part;GO:0031982,vesicle;GO:0042995,cell projection;GO:0044422,organelle part;GO:0070062,extracellular vesicular exosome;GO:0015629,actin cytoskeleton;GO:0044464,cell part;GO:0043230,extracellular organelle;GO:0043227,membrane-bounded organelle;GO:0043232,intracellular non-membrane-bounded organelle;GO:0044421,extracellular regi…	GO:0005178,integrin binding;GO:0032403,protein complex binding;GO:0005515,protein binding;GO:0005102,receptor binding;GO:0005488,binding
78	sp|P01877|IGHA2_HUMAN	Ig alpha-2 chain C region OS=Homo sapiens GN=IGHA2 PE=1 SV=3	down	0.414794	0.0292465	immune system process;regulation of biological process;multi-organism process;establishment of localization;cellular component organization or biogenesis;positive regulation of biological process;multicellular organismal process;cellular process;response to stimulus;signaling;localization;biological regulation;metabolic process	extracellular region part;extracellular region;organelle;macromolecular complex;cell part;cell	binding		Fc epsilon RI signaling pathway;Viral myocarditis;Primary immunodeficiency;Staphylococcus aureus infection;Natural killer cell mediated cytotoxicity;Hematopoietic cell lineage;Asthma;Leishmaniasis;Phagosome;Systemic lupus erythematosus;Fc gamma R-mediated phagocytosis;Allograft rejection;B cell receptor signaling pathway;Dilated cardiomyopathy;Autoimmune thyroid disease;Intestinal immune network …	GO:0065007,biological regulation;GO:0009617,response to bacterium;GO:0009605,response to external stimulus;GO:0006950,response to stress;GO:0002694,regulation of leukocyte activation;GO:0048584,positive regulation of response to stimulus;GO:0009607,response to biotic stimulus;GO:0002252,immune effector process;GO:0003094,glomerular filtration;GO:0007154,cell communication;GO:0043283,biopolymer me…	GO:0031982,vesicle;GO:0070062,extracellular vesicular exosome;GO:0044464,cell part;GO:0043230,extracellular organelle;GO:0043227,membrane-bounded organelle;GO:0044421,extracellular region part;GO:0005623,cell;GO:0009986,cell surface;GO:0043226,organelle;GO:0044425,membrane part;GO:0005886,plasma membrane;GO:0005576,extracellular region;GO:0009897,external side of plasma membrane;GO:0065010,extrac…	GO:0003823,antigen binding;GO:0005515,protein binding;GO:0034987,immunoglobulin receptor binding;GO:0005102,receptor binding;GO:0005488,binding
79	sp|Q16610|ECM1_HUMAN	Extracellular matrix protein 1 OS=Homo sapiens GN=ECM1 PE=1 SV=2	down	0.490606	0.0305373	immune system process;regulation of biological process;positive regulation of biological process;developmental process;multicellular organismal process;cellular process;cell proliferation;response to stimulus;signaling;negative regulation of biological process;localization;locomotion;biological regulation;metabolic process	extracellular region part;extracellular region;organelle	molecular transducer activity;binding			GO:0065007,biological regulation;GO:0010740,positive regulation of protein kinase cascade;GO:0045766,positive regulation of angiogenesis;GO:0050793,regulation of developmental process;GO:0009605,response to external stimulus;GO:0006950,response to stress;GO:0031326,regulation of cellular biosynthetic process;GO:0070168,negative regulation of biomineral formation;GO:0051239,regulation of multicell…	GO:0005615,extracellular space;GO:0005578,proteinaceous extracellular matrix;GO:0031982,vesicle;GO:0043226,organelle;GO:0031012,extracellular matrix;GO:0005576,extracellular region;GO:0070062,extracellular vesicular exosome;GO:0043230,extracellular organelle;GO:0065010,extracellular membrane-bounded organelle;GO:0043227,membrane-bounded organelle;GO:0031988,membrane-bounded vesicle;GO:0044421,ext…	GO:0005515,protein binding;GO:0008083,growth factor activity;GO:0050840,extracellular matrix binding;GO:0005488,binding;GO:0004871,signal transducer activity;GO:0060089,molecular transducer activity;GO:0019899,enzyme binding;GO:0002020,protease binding;GO:0008022,protein C-terminus binding;GO:0005102,receptor binding;GO:0043236,laminin binding
80	sp|P55058|PLTP_HUMAN	Phospholipid transfer protein OS=Homo sapiens GN=PLTP PE=1 SV=1	down	0.317348	0.039774	regulation of biological process;establishment of localization;cellular component organization or biogenesis;positive regulation of biological process;multicellular organismal process;cellular process;localization;locomotion;biological regulation;metabolic process	extracellular region part;extracellular region	transporter activity;binding		PPAR signaling pathway	GO:0065007,biological regulation;GO:0032373,positive regulation of sterol transport;GO:0048870,cell motility;GO:0034369,plasma lipoprotein particle remodeling;GO:0044238,primary metabolic process;GO:0010875,positive regulation of cholesterol efflux;GO:0032370,positive regulation of lipid transport;GO:0046483,heterocycle metabolic process;GO:0043933,macromolecular complex subunit organization;GO:0…	GO:0005615,extracellular space;GO:0005576,extracellular region;GO:0044421,extracellular region part	GO:0005319,lipid transporter activity;GO:0008289,lipid binding;GO:0022892,substrate-specific transporter activity;GO:0005215,transporter activity;GO:0005488,binding
81	sp|Q8WWA0|ITLN1_HUMAN	Intelectin-1 OS=Homo sapiens GN=ITLN1 PE=1 SV=1	down	0.520371	0.0447816	response to stimulus;regulation of biological process;multi-organism process;establishment of localization;positive regulation of biological process;localization;metabolic process;biological regulation;cellular process	extracellular region part;extracellular region;organelle;macromolecular complex;cell part;cell	binding			GO:0065007,biological regulation;GO:0060255,regulation of macromolecule metabolic process;GO:0001934,positive regulation of protein amino acid phosphorylation;GO:0009607,response to biotic stimulus;GO:0001932,regulation of protein amino acid phosphorylation;GO:0046324,regulation of glucose import;GO:0019220,regulation of phosphate metabolic process;GO:0032270,positive regulation of cellular prote…	GO:0031982,vesicle;GO:0042995,cell projection;GO:0031225,anchored to membrane;GO:0070062,extracellular vesicular exosome;GO:0044464,cell part;GO:0043230,extracellular organelle;GO:0044463,cell projection part;GO:0043227,membrane-bounded organelle;GO:0044421,extracellular region part;GO:0043234,protein complex;GO:0043235,receptor complex;GO:0005623,cell;GO:0031253,cell projection membrane;GO:00329…	GO:0030246,carbohydrate binding;GO:0005488,binding
82	sp|P07357|CO8A_HUMAN	Complement component C8 alpha chain OS=Homo sapiens GN=C8A PE=1 SV=2	down	0.195527	0.00805671	immune system process;regulation of biological process;positive regulation of biological process;cellular process;response to stimulus;biological regulation;metabolic process;death	extracellular region part;extracellular region;organelle;macromolecular complex;cell part;cell	binding		Complement and coagulation cascades;Systemic lupus erythematosus;Prion diseases;Amoebiasis	GO:0009894,regulation of catabolic process;GO:0002673,regulation of acute inflammatory response;GO:0065007,biological regulation;GO:0009605,response to external stimulus;GO:0031347,regulation of defense response;GO:0006950,response to stress;GO:0048584,positive regulation of response to stimulus;GO:0002252,immune effector process;GO:0030449,regulation of complement activation;GO:0043283,biopolyme…	GO:0031982,vesicle;GO:0070062,extracellular vesicular exosome;GO:0044464,cell part;GO:0043230,extracellular organelle;GO:0016021,integral to membrane;GO:0043227,membrane-bounded organelle;GO:0044421,extracellular region part;GO:0043234,protein complex;GO:0005623,cell;GO:0032991,macromolecular complex;GO:0044425,membrane part;GO:0005579,membrane attack complex;GO:0043226,organelle;GO:0005886,plasm…	GO:0001848,complement binding;GO:0032403,protein complex binding;GO:0005515,protein binding;GO:0005488,binding
83	sp|P01859|IGHG2_HUMAN	Ig gamma-2 chain C region OS=Homo sapiens GN=IGHG2 PE=1 SV=2	up	2.15758	0.0152313	immune system process;regulation of biological process;multi-organism process;establishment of localization;cellular component organization or biogenesis;positive regulation of biological process;multicellular organismal process;cellular process;response to stimulus;signaling;localization;biological regulation;metabolic process	extracellular region part;extracellular region;organelle;macromolecular complex;cell part;cell	binding		Fc epsilon RI signaling pathway;Viral myocarditis;Primary immunodeficiency;Staphylococcus aureus infection;Natural killer cell mediated cytotoxicity;Hematopoietic cell lineage;Asthma;Leishmaniasis;Phagosome;Systemic lupus erythematosus;Fc gamma R-mediated phagocytosis;Allograft rejection;B cell receptor signaling pathway;Dilated cardiomyopathy;Autoimmune thyroid disease;Intestinal immune network …	GO:0065007,biological regulation;GO:0009617,response to bacterium;GO:0009605,response to external stimulus;GO:0006950,response to stress;GO:0002694,regulation of leukocyte activation;GO:0048584,positive regulation of response to stimulus;GO:0009607,response to biotic stimulus;GO:0002252,immune effector process;GO:0007154,cell communication;GO:0043283,biopolymer metabolic process;GO:0016044,membra…	GO:0031982,vesicle;GO:0070062,extracellular vesicular exosome;GO:0044464,cell part;GO:0043230,extracellular organelle;GO:0043227,membrane-bounded organelle;GO:0044421,extracellular region part;GO:0005615,extracellular space;GO:0019814,immunoglobulin complex;GO:0043234,protein complex;GO:0005623,cell;GO:0032991,macromolecular complex;GO:0044425,membrane part;GO:0009986,cell surface;GO:0043226,orga…	GO:0003823,antigen binding;GO:0005515,protein binding;GO:0034987,immunoglobulin receptor binding;GO:0005102,receptor binding;GO:0005488,binding
84	sp|P27169|PON1_HUMAN	Serum paraoxonase/arylesterase 1 OS=Homo sapiens GN=PON1 PE=1 SV=3	up	4.41862	0.00338886	regulation of biological process;establishment of localization;positive regulation of biological process;multicellular organismal process;cellular process;response to stimulus;negative regulation of biological process;localization;biological regulation;metabolic process	extracellular region part;extracellular region;organelle;macromolecular complex;cell part;cell	binding;catalytic activity;antioxidant activity		Metabolic pathways;Microbial metabolism in diverse environments	GO:0065007,biological regulation;GO:0016054,organic acid catabolic process;GO:0006576,biogenic amine metabolic process;GO:0009605,response to external stimulus;GO:0019637,organophosphate metabolic process;GO:0050748,negative regulation of lipoprotein metabolic process;GO:0042221,response to chemical stimulus;GO:0032370,positive regulation of lipid transport;GO:0031324,negative regulation of cellu…	GO:0043229,intracellular organelle;GO:0034366,spherical high-density lipoprotein particle;GO:0032994,protein-lipid complex;GO:0031982,vesicle;GO:0070062,extracellular vesicular exosome;GO:0044464,cell part;GO:0043230,extracellular organelle;GO:0043227,membrane-bounded organelle;GO:0044421,extracellular region part;GO:0043231,intracellular membrane-bounded organelle;GO:0005615,extracellular space;…	GO:0043169,cation binding;GO:0008034,lipoprotein binding;GO:0042803,protein homodimerization activity;GO:0008289,lipid binding;GO:0005515,protein binding;GO:0003824,catalytic activity;GO:0042578,phosphoric ester hydrolase activity;GO:0016788,hydrolase activity, acting on ester bonds;GO:0043167,ion binding;GO:0016209,antioxidant activity;GO:0005543,phospholipid binding;GO:0046872,metal ion binding…
85	sp|P39060|COIA1_HUMAN	Collagen alpha-1(XVIII) chain OS=Homo sapiens GN=COL18A1 PE=1 SV=5	down	0.500538	0.000506232	regulation of biological process;cellular component organization or biogenesis;positive regulation of biological process;developmental process;multicellular organismal process;cellular process;cell proliferation;negative regulation of biological process;localization;locomotion;metabolic process;biological regulation;death	extracellular region part;extracellular region;organelle;cell part;cell;organelle part;membrane-enclosed lumen	binding		Protein digestion and absorption	GO:0050877,neurological system process;GO:0065007,biological regulation;GO:0007600,sensory perception;GO:0048514,blood vessel morphogenesis;GO:0000902,cell morphogenesis;GO:0048731,system development;GO:0043062,extracellular structure organization;GO:0000904,cell morphogenesis involved in differentiation;GO:0030574,collagen catabolic process;GO:0001944,vasculature development;GO:0008285,negative …	GO:0043229,intracellular organelle;GO:0044446,intracellular organelle part;GO:0044444,cytoplasmic part;GO:0005783,endoplasmic reticulum;GO:0031982,vesicle;GO:0044422,organelle part;GO:0043233,organelle lumen;GO:0070062,extracellular vesicular exosome;GO:0005788,endoplasmic reticulum lumen;GO:0005581,collagen;GO:0044464,cell part;GO:0043230,extracellular organelle;GO:0043227,membrane-bounded organ…	GO:0042802,identical protein binding;GO:0005515,protein binding;GO:0005488,binding
86	sp|O75636|FCN3_HUMAN	Ficolin-3 OS=Homo sapiens GN=FCN3 PE=1 SV=2	down	0.316495	0.0175855	reproduction;multi-organism process;positive regulation of biological process;multicellular organismal process;cellular process;viral reproduction;negative regulation of biological process;biological regulation;metabolic process;immune system process;reproductive process;regulation of biological process;cellular component organization or biogenesis;establishment of localization;response to stimul…	extracellular region part;extracellular region;cell part;cell	binding			GO:0065007,biological regulation;GO:0048583,regulation of response to stimulus;GO:0009605,response to external stimulus;GO:0006950,response to stress;GO:0044238,primary metabolic process;GO:0048584,positive regulation of response to stimulus;GO:0009607,response to biotic stimulus;GO:0002252,immune effector process;GO:0043283,biopolymer metabolic process;GO:0048525,negative regulation of viral rep…	GO:0005623,cell;GO:0005578,proteinaceous extracellular matrix;GO:0031012,extracellular matrix;GO:0005576,extracellular region;GO:0005581,collagen;GO:0044464,cell part;GO:0044420,extracellular matrix part;GO:0016020,membrane;GO:0044421,extracellular region part	GO:0043167,ion binding;GO:0043169,cation binding;GO:0046872,metal ion binding;GO:0003823,antigen binding;GO:0005515,protein binding;GO:0030246,carbohydrate binding;GO:0005488,binding
87	sp|A0A087WSY6|KVD15_HUMAN	Immunoglobulin kappa variable 3D-15 OS=Homo sapiens GN=IGKV3D-15 PE=3 SV=6	down	0.402902	0.0357346	immune system process;regulation of biological process;establishment of localization;cellular component organization or biogenesis;positive regulation of biological process;cellular process;response to stimulus;localization;biological regulation;metabolic process	extracellular region part;extracellular region;organelle;cell part;cell	binding		Primary immunodeficiency	GO:0065007,biological regulation;GO:0048583,regulation of response to stimulus;GO:0009605,response to external stimulus;GO:0006950,response to stress;GO:0044238,primary metabolic process;GO:0048584,positive regulation of response to stimulus;GO:0002455,humoral immune response mediated by circulating immunoglobulin;GO:0002252,immune effector process;GO:0043283,biopolymer metabolic process;GO:00160…	GO:0005623,cell;GO:0031982,vesicle;GO:0043226,organelle;GO:0005886,plasma membrane;GO:0005576,extracellular region;GO:0070062,extracellular vesicular exosome;GO:0044464,cell part;GO:0043230,extracellular organelle;GO:0065010,extracellular membrane-bounded organelle;GO:0031988,membrane-bounded vesicle;GO:0043227,membrane-bounded organelle;GO:0016020,membrane;GO:0044421,extracellular region part	GO:0003823,antigen binding;GO:0005488,binding
88	sp|Q9BXR6|FHR5_HUMAN	Complement factor H-related protein 5 OS=Homo sapiens GN=CFHR5 PE=1 SV=1	down	0.21882	0.0178138	response to stimulus;immune system process;regulation of biological process;positive regulation of biological process;metabolic process;biological regulation	extracellular region			Complement and coagulation cascades;Staphylococcus aureus infection	GO:0065007,biological regulation;GO:0048583,regulation of response to stimulus;GO:0009605,response to external stimulus;GO:0006950,response to stress;GO:0044238,primary metabolic process;GO:0048584,positive regulation of response to stimulus;GO:0002252,immune effector process;GO:0043283,biopolymer metabolic process;GO:0016485,protein processing;GO:0043170,macromolecule metabolic process;GO:000961…	GO:0005576,extracellular region
89	sp|P02760|AMBP_HUMAN	Protein AMBP OS=Homo sapiens GN=AMBP PE=1 SV=1	down	0.516263	0.0274137	reproduction;multi-organism process;cellular process;signaling;viral reproduction;negative regulation of biological process;biological regulation;metabolic process;immune system process;reproductive process;regulation of biological process;cellular component organization or biogenesis;establishment of localization;biological adhesion;response to stimulus;localization	extracellular region part;extracellular region;organelle;cell part;cell	enzyme regulator activity;binding;channel regulator activity		Complement and coagulation cascades	GO:0065007,biological regulation;GO:0034960,cellular biopolymer metabolic process;GO:0042440,pigment metabolic process;GO:0052548,regulation of endopeptidase activity;GO:0046483,heterocycle metabolic process;GO:0043283,biopolymer metabolic process;GO:0050777,negative regulation of immune response;GO:0016044,membrane organization;GO:0009966,regulation of signal transduction;GO:0043086,negative reg…	GO:0043229,intracellular organelle;GO:0031982,vesicle;GO:0070062,extracellular vesicular exosome;GO:0044464,cell part;GO:0043230,extracellular organelle;GO:0043227,membrane-bounded organelle;GO:0044421,extracellular region part;GO:0043231,intracellular membrane-bounded organelle;GO:0044424,intracellular part;GO:0005623,cell;GO:0009986,cell surface;GO:0043226,organelle;GO:0005886,plasma membrane;G…	GO:0043169,cation binding;GO:0042803,protein homodimerization activity;GO:0046906,tetrapyrrole binding;GO:0032403,protein complex binding;GO:0005515,protein binding;GO:0005506,iron ion binding;GO:0015457,auxiliary transport protein activity;GO:0046914,transition metal ion binding;GO:0043167,ion binding;GO:0004867,serine-type endopeptidase inhibitor activity;GO:0020037,heme binding;GO:0030234,enzy…
90	sp|Q15942|ZYX_HUMAN	Zyxin OS=Homo sapiens GN=ZYX PE=1 SV=1	up	1.56477	0.00516775	response to stimulus;biological adhesion;regulation of biological process;signaling;cellular component organization or biogenesis;biological regulation;cellular process	organelle;cell part;cell;organelle part	binding		Focal adhesion	GO:0065007,biological regulation;GO:0007160,cell-matrix adhesion;GO:0010926,anatomical structure formation;GO:0006996,organelle organization;GO:0007167,enzyme linked receptor protein signaling pathway;GO:0007267,cell-cell signaling;GO:0007015,actin filament organization;GO:0030036,actin cytoskeleton organization;GO:0030029,actin filament-based process;GO:0007154,cell communication;GO:0031589,cell…	GO:0044446,intracellular organelle part;GO:0001725,stress fiber;GO:0044422,organelle part;GO:0044464,cell part;GO:0005911,cell-cell junction;GO:0043232,intracellular non-membrane-bounded organelle;GO:0043231,intracellular membrane-bounded organelle;GO:0030055,cell-substrate junction;GO:0005623,cell;GO:0005634,nucleus;GO:0044425,membrane part;GO:0005912,adherens junction;GO:0043228,non-membrane-bo…	GO:0043167,ion binding;GO:0043169,cation binding;GO:0046872,metal ion binding;GO:0005515,protein binding;GO:0005488,binding
91	sp|Q08380|LG3BP_HUMAN	Galectin-3-binding protein OS=Homo sapiens GN=LGALS3BP PE=1 SV=1	down	0.564308	0.0266756	regulation of biological process;establishment of localization;cellular component organization or biogenesis;cellular process;biological adhesion;response to stimulus;signaling;localization;biological regulation	extracellular region part;extracellular region;organelle;cell part;cell	molecular transducer activity;binding		Salivary secretion	GO:0065007,biological regulation;GO:0006952,defense response;GO:0006950,response to stress;GO:0010324,membrane invagination;GO:0007154,cell communication;GO:0016044,membrane organization;GO:0051234,establishment of localization;GO:0022610,biological adhesion;GO:0006968,cellular defense response;GO:0050789,regulation of biological process;GO:0016192,vesicle-mediated transport;GO:0050794,regulation…	GO:0005623,cell;GO:0005578,proteinaceous extracellular matrix;GO:0031982,vesicle;GO:0043226,organelle;GO:0031012,extracellular matrix;GO:0005576,extracellular region;GO:0070062,extracellular vesicular exosome;GO:0044464,cell part;GO:0043230,extracellular organelle;GO:0065010,extracellular membrane-bounded organelle;GO:0043227,membrane-bounded organelle;GO:0031988,membrane-bounded vesicle;GO:00160…	GO:0060089,molecular transducer activity;GO:0004871,signal transducer activity;GO:0004872,receptor activity;GO:0005044,scavenger receptor activity;GO:0005515,protein binding;GO:0005488,binding;GO:0004888,transmembrane receptor activity
92	sp|Q9UK55|ZPI_HUMAN	Protein Z-dependent protease inhibitor OS=Homo sapiens GN=SERPINA10 PE=1 SV=1	down	0.575778	0.0166711	reproductive process;reproduction;regulation of biological process;establishment of localization;developmental process;multicellular organismal process;cellular process;response to stimulus;growth;localization;biological regulation;metabolic process	extracellular region part;extracellular region;organelle	enzyme regulator activity;binding	Posttranslational modification, protein turnover, chaperones ;	Complement and coagulation cascades	GO:0065007,biological regulation;GO:0009605,response to external stimulus;GO:0006950,response to stress;GO:0060341,regulation of cellular localization;GO:0048731,system development;GO:0042246,tissue regeneration;GO:0052548,regulation of endopeptidase activity;GO:0009888,tissue development;GO:0048589,developmental growth;GO:0051046,regulation of secretion;GO:0040007,growth;GO:0065009,regulation of…	GO:0005615,extracellular space;GO:0031982,vesicle;GO:0043226,organelle;GO:0005576,extracellular region;GO:0070062,extracellular vesicular exosome;GO:0043230,extracellular organelle;GO:0065010,extracellular membrane-bounded organelle;GO:0031988,membrane-bounded vesicle;GO:0043227,membrane-bounded organelle;GO:0044421,extracellular region part	GO:0030247,polysaccharide binding;GO:0005488,binding;GO:0004867,serine-type endopeptidase inhibitor activity;GO:0008201,heparin binding;GO:0030234,enzyme regulator activity;GO:0004866,endopeptidase inhibitor activity;GO:0030414,peptidase inhibitor activity;GO:0004857,enzyme inhibitor activity;GO:0030246,carbohydrate binding;GO:0005539,glycosaminoglycan binding;GO:0001871,pattern binding
93	sp|P07437|TBB5_HUMAN	Tubulin beta chain OS=Homo sapiens GN=TUBB PE=1 SV=2	up	2.96587	0.0356728	immune system process;regulation of biological process;multi-organism process;establishment of localization;cellular component organization or biogenesis;positive regulation of biological process;multicellular organismal process;cellular process;cell killing;response to stimulus;signaling;negative regulation of biological process;localization;biological regulation;metabolic process;death	extracellular region part;organelle;cell part;membrane-enclosed lumen;extracellular region;cell;macromolecular complex;organelle part	structural molecule activity;binding;catalytic activity	Cytoskeleton ;	Phagosome;Gap junction;Pathogenic Escherichia coli infection	GO:0009894,regulation of catabolic process;GO:0065007,biological regulation;GO:0034960,cellular biopolymer metabolic process;GO:0007051,spindle organization;GO:0050793,regulation of developmental process;GO:0031347,regulation of defense response;GO:0006950,response to stress;GO:0060341,regulation of cellular localization;GO:0009607,response to biotic stimulus;GO:0031324,negative regulation of cel…	GO:0044446,intracellular organelle part;GO:0030529,ribonucleoprotein complex;GO:0005681,spliceosomal complex;GO:0031981,nuclear lumen;GO:0031982,vesicle;GO:0044422,organelle part;GO:0043233,organelle lumen;GO:0070062,extracellular vesicular exosome;GO:0044464,cell part;GO:0005654,nucleoplasm;GO:0043232,intracellular non-membrane-bounded organelle;GO:0043231,intracellular membrane-bounded organell…	GO:0001883,purine nucleoside binding;GO:0017111,nucleoside-triphosphatase activity;GO:0005515,protein binding;GO:0031625,ubiquitin protein ligase binding;GO:0016817,hydrolase activity, acting on acid anhydrides;GO:0000166,nucleotide binding;GO:0003823,antigen binding;GO:0005524,ATP binding;GO:0005198,structural molecule activity;GO:0005525,GTP binding;GO:0017076,purine nucleotide binding;GO:00052…
94	sp|P00736|C1R_HUMAN	Complement C1r subcomponent OS=Homo sapiens GN=C1R PE=1 SV=2	down	0.265538	0.00912939	response to stimulus;immune system process;regulation of biological process;positive regulation of biological process;metabolic process;biological regulation	extracellular region part;extracellular region;organelle	binding;catalytic activity	Posttranslational modification, protein turnover, chaperones ;	Complement and coagulation cascades;Phagosome;Systemic lupus erythematosus;Staphylococcus aureus infection	GO:0065007,biological regulation;GO:0048583,regulation of response to stimulus;GO:0009605,response to external stimulus;GO:0006950,response to stress;GO:0044238,primary metabolic process;GO:0048584,positive regulation of response to stimulus;GO:0002455,humoral immune response mediated by circulating immunoglobulin;GO:0002252,immune effector process;GO:0043283,biopolymer metabolic process;GO:00160…	GO:0031982,vesicle;GO:0043226,organelle;GO:0005576,extracellular region;GO:0070062,extracellular vesicular exosome;GO:0043230,extracellular organelle;GO:0065010,extracellular membrane-bounded organelle;GO:0031988,membrane-bounded vesicle;GO:0043227,membrane-bounded organelle;GO:0044421,extracellular region part	GO:0043169,cation binding;GO:0008233,peptidase activity;GO:0046872,metal ion binding;GO:0070011,peptidase activity, acting on L-amino acid peptides;GO:0017171,serine hydrolase activity;GO:0005515,protein binding;GO:0003824,catalytic activity;GO:0005488,binding;GO:0043167,ion binding;GO:0005509,calcium ion binding;GO:0008236,serine-type peptidase activity;GO:0016787,hydrolase activity;GO:0004252,s…
95	sp|P01008|ANT3_HUMAN	Antithrombin-III OS=Homo sapiens GN=SERPINC1 PE=1 SV=1	up	2.13124	0.00521386	response to stimulus;regulation of biological process;negative regulation of biological process;metabolic process;biological regulation;multicellular organismal process;cellular process	extracellular region part;extracellular region;organelle;cell part;cell	enzyme regulator activity;binding	Posttranslational modification, protein turnover, chaperones ;	Complement and coagulation cascades	GO:0065007,biological regulation;GO:0031667,response to nutrient levels;GO:0034960,cellular biopolymer metabolic process;GO:0048583,regulation of response to stimulus;GO:0032102,negative regulation of response to external stimulus;GO:0009605,response to external stimulus;GO:0031347,regulation of defense response;GO:0042221,response to chemical stimulus;GO:0044238,primary metabolic process;GO:0080…	GO:0005623,cell;GO:0031982,vesicle;GO:0043226,organelle;GO:0005886,plasma membrane;GO:0005576,extracellular region;GO:0070062,extracellular vesicular exosome;GO:0044464,cell part;GO:0043230,extracellular organelle;GO:0065010,extracellular membrane-bounded organelle;GO:0031988,membrane-bounded vesicle;GO:0043227,membrane-bounded organelle;GO:0016020,membrane;GO:0044421,extracellular region part	GO:0005515,protein binding;GO:0030247,polysaccharide binding;GO:0005488,binding;GO:0004867,serine-type endopeptidase inhibitor activity;GO:0019899,enzyme binding;GO:0002020,protease binding;GO:0008201,heparin binding;GO:0030414,peptidase inhibitor activity;GO:0030234,enzyme regulator activity;GO:0004866,endopeptidase inhibitor activity;GO:0004857,enzyme inhibitor activity;GO:0030246,carbohydrate …
96	sp|Q9UGM5|FETUB_HUMAN	Fetuin-B OS=Homo sapiens GN=FETUB PE=1 SV=2	up	1.55538	0.0214831	reproductive process;reproduction;regulation of biological process;metabolic process;biological regulation;multicellular organismal process;cellular process	extracellular region part;extracellular region;organelle	enzyme regulator activity		Wnt signaling pathway;Complement and coagulation cascades;RNA transport	GO:0065007,biological regulation;GO:0050790,regulation of catalytic activity;GO:0010466,negative regulation of peptidase activity;GO:0052548,regulation of endopeptidase activity;GO:0009566,fertilization;GO:0007338,single fertilization;GO:0065009,regulation of molecular function;GO:0051336,regulation of hydrolase activity;GO:0043086,negative regulation of catalytic activity;GO:0019953,sexual repro…	GO:0005615,extracellular space;GO:0031982,vesicle;GO:0043226,organelle;GO:0005576,extracellular region;GO:0070062,extracellular vesicular exosome;GO:0043230,extracellular organelle;GO:0065010,extracellular membrane-bounded organelle;GO:0031988,membrane-bounded vesicle;GO:0043227,membrane-bounded organelle;GO:0044421,extracellular region part	GO:0004869,cysteine-type endopeptidase inhibitor activity;GO:0030414,peptidase inhibitor activity;GO:0004866,endopeptidase inhibitor activity;GO:0030234,enzyme regulator activity;GO:0004857,enzyme inhibitor activity
97	sp|P02747|C1QC_HUMAN	Complement C1q subcomponent subunit C OS=Homo sapiens GN=C1QC PE=1 SV=3	down	0.320298	0.00825181	immune system process;regulation of biological process;positive regulation of biological process;developmental process;multicellular organismal process;cellular process;response to stimulus;negative regulation of biological process;biological regulation;metabolic process	extracellular region part;extracellular region;organelle			Complement and coagulation cascades;Chagas disease;Systemic lupus erythematosus;Staphylococcus aureus infection;Prion diseases	GO:0065007,biological regulation;GO:0048583,regulation of response to stimulus;GO:0050793,regulation of developmental process;GO:0009605,response to external stimulus;GO:0006950,response to stress;GO:0044238,primary metabolic process;GO:0030852,regulation of granulocyte differentiation;GO:0048584,positive regulation of response to stimulus;GO:0002455,humoral immune response mediated by circulatin…	GO:0031982,vesicle;GO:0043226,organelle;GO:0005576,extracellular region;GO:0070062,extracellular vesicular exosome;GO:0043230,extracellular organelle;GO:0065010,extracellular membrane-bounded organelle;GO:0031988,membrane-bounded vesicle;GO:0043227,membrane-bounded organelle;GO:0044421,extracellular region part
98	sp|Q04695|K1C17_HUMAN	Keratin, type I cytoskeletal 17 OS=Homo sapiens GN=KRT17 PE=1 SV=2	down	0.547826	0.0119396	regulation of biological process;cellular component organization or biogenesis;positive regulation of biological process;developmental process;multicellular organismal process;cellular process;response to stimulus;growth;signaling;biological regulation;metabolic process	extracellular region part;extracellular region;organelle;macromolecular complex;cell part;cell;organelle part	molecular transducer activity;structural molecule activity;binding		Staphylococcus aureus infection;Pathogenic Escherichia coli infection	GO:0065007,biological regulation;GO:0042303,molting cycle;GO:0050793,regulation of developmental process;GO:0031424,keratinization;GO:0048731,system development;GO:0031326,regulation of cellular biosynthetic process;GO:0009888,tissue development;GO:0009891,positive regulation of biosynthetic process;GO:0051239,regulation of multicellular organismal process;GO:0007154,cell communication;GO:0007398…	GO:0043229,intracellular organelle;GO:0044446,intracellular organelle part;GO:0031982,vesicle;GO:0044422,organelle part;GO:0070062,extracellular vesicular exosome;GO:0044464,cell part;GO:0043230,extracellular organelle;GO:0043227,membrane-bounded organelle;GO:0045111,intermediate filament cytoskeleton;GO:0043232,intracellular non-membrane-bounded organelle;GO:0044421,extracellular region part;GO:…	GO:0004872,receptor activity;GO:0042287,MHC protein binding;GO:0005515,protein binding;GO:0005488,binding;GO:0005198,structural molecule activity;GO:0004871,signal transducer activity;GO:0060089,molecular transducer activity;GO:0005200,structural constituent of cytoskeleton;GO:0005102,receptor binding;GO:0004888,transmembrane receptor activity
99	sp|Q7Z794|K2C1B_HUMAN	Keratin, type II cytoskeletal 1b OS=Homo sapiens GN=KRT77 PE=2 SV=3	down	0.387752	0.0240021	immune system process;regulation of biological process;positive regulation of biological process;multicellular organismal process;response to stimulus;negative regulation of biological process;biological regulation;metabolic process	extracellular region part;extracellular region;organelle;macromolecular complex;cell part;cell;organelle part	structural molecule activity;binding			GO:0065007,biological regulation;GO:0048583,regulation of response to stimulus;GO:0032102,negative regulation of response to external stimulus;GO:0009605,response to external stimulus;GO:0031347,regulation of defense response;GO:0006950,response to stress;GO:0044238,primary metabolic process;GO:0080134,regulation of response to stress;GO:0048584,positive regulation of response to stimulus;GO:0002…	GO:0043229,intracellular organelle;GO:0044446,intracellular organelle part;GO:0031982,vesicle;GO:0044422,organelle part;GO:0070062,extracellular vesicular exosome;GO:0044464,cell part;GO:0043230,extracellular organelle;GO:0043227,membrane-bounded organelle;GO:0045111,intermediate filament cytoskeleton;GO:0043232,intracellular non-membrane-bounded organelle;GO:0044421,extracellular region part;GO:…	GO:0005198,structural molecule activity;GO:0030246,carbohydrate binding;GO:0005488,binding
100	sp|P15169|CBPN_HUMAN	Carboxypeptidase N catalytic chain OS=Homo sapiens GN=CPN1 PE=1 SV=1	down	0.437427	0.0224252	regulation of biological process;establishment of localization;positive regulation of biological process;developmental process;multicellular organismal process;cellular process;response to stimulus;signaling;negative regulation of biological process;localization;biological regulation;metabolic process	extracellular region part;extracellular region;organelle;cell part;cell	transporter activity;binding;catalytic activity	Amino acid transport and metabolism ;		GO:0065007,biological regulation;GO:0010740,positive regulation of protein kinase cascade;GO:0050793,regulation of developmental process;GO:0051897,positive regulation of protein kinase B signaling cascade;GO:0019637,organophosphate metabolic process;GO:0042221,response to chemical stimulus;GO:0048731,system development;GO:0009719,response to endogenous stimulus;GO:0031326,regulation of cellular …	GO:0043229,intracellular organelle;GO:0044444,cytoplasmic part;GO:0031982,vesicle;GO:0070062,extracellular vesicular exosome;GO:0044464,cell part;GO:0043230,extracellular organelle;GO:0043227,membrane-bounded organelle;GO:0044421,extracellular region part;GO:0043231,intracellular membrane-bounded organelle;GO:0005615,extracellular space;GO:0044424,intracellular part;GO:0005737,cytoplasm;GO:000563…	GO:0043169,cation binding;GO:0042803,protein homodimerization activity;GO:0017171,serine hydrolase activity;GO:0008289,lipid binding;GO:0005515,protein binding;GO:0003824,catalytic activity;GO:0046914,transition metal ion binding;GO:0008237,metallopeptidase activity;GO:0043167,ion binding;GO:0005543,phospholipid binding;GO:0008236,serine-type peptidase activity;GO:0008233,peptidase activity;GO:00…
101	sp|Q71U36|TBA1A_HUMAN	Tubulin alpha-1A chain OS=Homo sapiens GN=TUBA1A PE=1 SV=1	up	1.95446	0.0109429	regulation of biological process;establishment of localization;cellular component organization or biogenesis;developmental process;multicellular organismal process;cellular process;response to stimulus;negative regulation of biological process;localization;biological regulation;metabolic process;death	extracellular region part;extracellular region;organelle;macromolecular complex;cell part;cell;organelle part	structural molecule activity;binding;catalytic activity	Cytoskeleton ;	Phagosome;Gap junction;Pathogenic Escherichia coli infection	GO:0043067,regulation of programmed cell death;GO:0065007,biological regulation;GO:0010941,regulation of cell death;GO:0034960,cellular biopolymer metabolic process;GO:0050793,regulation of developmental process;GO:0046907,intracellular transport;GO:0048731,system development;GO:0044238,primary metabolic process;GO:0000278,mitotic cell cycle;GO:0030705,cytoskeleton-dependent intracellular transpo…	GO:0043229,intracellular organelle;GO:0044446,intracellular organelle part;GO:0044444,cytoplasmic part;GO:0005768,endosome;GO:0043209,myelin sheath;GO:0031982,vesicle;GO:0044422,organelle part;GO:0070062,extracellular vesicular exosome;GO:0044464,cell part;GO:0043230,extracellular organelle;GO:0005881,cytoplasmic microtubule;GO:0043227,membrane-bounded organelle;GO:0043232,intracellular non-membr…	GO:0032553,ribonucleotide binding;GO:0017111,nucleoside-triphosphatase activity;GO:0005515,protein binding;GO:0003824,catalytic activity;GO:0019904,protein domain specific binding;GO:0003924,GTPase activity;GO:0019899,enzyme binding;GO:0031625,ubiquitin protein ligase binding;GO:0032561,guanyl ribonucleotide binding;GO:0016817,hydrolase activity, acting on acid anhydrides;GO:0003676,nucleic acid …
102	sp|P05156|CFAI_HUMAN	Complement factor I OS=Homo sapiens GN=CFI PE=1 SV=2	down	0.596348	0.0123256	immune system process;regulation of biological process;establishment of localization;cellular component organization or biogenesis;positive regulation of biological process;cellular process;response to stimulus;localization;biological regulation;metabolic process	extracellular region part;extracellular region;organelle;cell part;cell	molecular transducer activity;binding;catalytic activity	Posttranslational modification, protein turnover, chaperones ;	Complement and coagulation cascades;Staphylococcus aureus infection	GO:0009894,regulation of catabolic process;GO:0002673,regulation of acute inflammatory response;GO:0065007,biological regulation;GO:0009605,response to external stimulus;GO:0031347,regulation of defense response;GO:0006950,response to stress;GO:0048584,positive regulation of response to stimulus;GO:0002252,immune effector process;GO:0030449,regulation of complement activation;GO:0043283,biopolyme…	GO:0043229,intracellular organelle;GO:0031982,vesicle;GO:0070062,extracellular vesicular exosome;GO:0044464,cell part;GO:0043230,extracellular organelle;GO:0043227,membrane-bounded organelle;GO:0044421,extracellular region part;GO:0005615,extracellular space;GO:0043231,intracellular membrane-bounded organelle;GO:0044424,intracellular part;GO:0005634,nucleus;GO:0005623,cell;GO:0043226,organelle;GO…	GO:0043169,cation binding;GO:0004872,receptor activity;GO:0017171,serine hydrolase activity;GO:0005515,protein binding;GO:0003824,catalytic activity;GO:0043167,ion binding;GO:0004871,signal transducer activity;GO:0060089,molecular transducer activity;GO:0008236,serine-type peptidase activity;GO:0004888,transmembrane receptor activity;GO:0046872,metal ion binding;GO:0008233,peptidase activity;GO:0…
103	sp|P01619|KV320_HUMAN	Immunoglobulin kappa variable 3-20 OS=Homo sapiens GN=IGKV3-20 PE=1 SV=2	up	12.1153	0.0265859					Primary immunodeficiency
104	sp|P01344|IGF2_HUMAN	Insulin-like growth factor II OS=Homo sapiens GN=IGF2 PE=1 SV=1	down	0.445106	0.0352387	reproduction;multi-organism process;positive regulation of biological process;developmental process;multicellular organismal process;cellular process;growth;signaling;negative regulation of biological process;metabolic process;biological regulation;death;reproductive process;immune system process;regulation of biological process;cellular component organization or biogenesis;establishment of local…	extracellular region part;extracellular region;organelle;cell part;cell;organelle part;membrane-enclosed lumen	enzyme regulator activity;receptor regulator activity;binding			GO:0010740,positive regulation of protein kinase cascade;GO:0007517,muscle organ development;GO:0010628,positive regulation of gene expression;GO:0045893,positive regulation of transcription, DNA-dependent;GO:0031347,regulation of defense response;GO:0042221,response to chemical stimulus;GO:0002694,regulation of leukocyte activation;GO:0048731,system development;GO:0002576,platelet degranulation;…	GO:0044446,intracellular organelle part;GO:0031982,vesicle;GO:0044422,organelle part;GO:0043233,organelle lumen;GO:0070062,extracellular vesicular exosome;GO:0044464,cell part;GO:0043231,intracellular membrane-bounded organelle;GO:0031974,membrane-enclosed lumen;GO:0005623,cell;GO:0030141,secretory granule;GO:0005576,extracellular region;GO:0065010,extracellular membrane-bounded organelle;GO:0031…	GO:0019207,kinase regulator activity;GO:0032403,protein complex binding;GO:0019887,protein kinase regulator activity;GO:0005515,protein binding;GO:0008083,growth factor activity;GO:0005179,hormone activity;GO:0005488,binding;GO:0005159,insulin-like growth factor receptor binding;GO:0004871,signal transducer activity;GO:0060089,molecular transducer activity;GO:0005102,receptor binding;GO:0030234,e…
105	sp|P0DJI8|SAA1_HUMAN	Serum amyloid A-1 protein OS=Homo sapiens GN=SAA1 PE=1 SV=1	down	0.348195	0.00763881	immune system process;regulation of biological process;establishment of localization;cellular component organization or biogenesis;positive regulation of biological process;multicellular organismal process;cellular process;response to stimulus;biological adhesion;signaling;negative regulation of biological process;localization;locomotion;metabolic process;biological regulation	extracellular region part;organelle;cell part;membrane-enclosed lumen;extracellular region;cell;macromolecular complex;organelle part	binding;chemoattractant activity			GO:0051338,regulation of transferase activity;GO:0000187,activation of MAPK activity;GO:0065007,biological regulation;GO:0050801,ion homeostasis;GO:0016477,cell migration;GO:0034960,cellular biopolymer metabolic process;GO:0048870,cell motility;GO:0009605,response to external stimulus;GO:0007243,protein kinase cascade;GO:0031347,regulation of defense response;GO:0060326,cell chemotaxis;GO:0006950…	GO:0043229,intracellular organelle;GO:0044446,intracellular organelle part;GO:0044444,cytoplasmic part;GO:0032994,protein-lipid complex;GO:0031982,vesicle;GO:0044422,organelle part;GO:0070062,extracellular vesicular exosome;GO:0044464,cell part;GO:0043230,extracellular organelle;GO:0005881,cytoplasmic microtubule;GO:0043227,membrane-bounded organelle;GO:0043232,intracellular non-membrane-bounded …	GO:0005515,protein binding;GO:0001664,G-protein-coupled receptor binding;GO:0030247,polysaccharide binding;GO:0005488,binding;GO:0008201,heparin binding;GO:0005102,receptor binding;GO:0030246,carbohydrate binding;GO:0005539,glycosaminoglycan binding;GO:0001871,pattern binding
106	sp|Q8N1N4|K2C78_HUMAN	Keratin, type II cytoskeletal 78 OS=Homo sapiens GN=KRT78 PE=2 SV=2	down	0.569692	0.0384347		extracellular region part;extracellular region;organelle;macromolecular complex;cell part;cell;organelle part					GO:0043229,intracellular organelle;GO:0044446,intracellular organelle part;GO:0031982,vesicle;GO:0044422,organelle part;GO:0070062,extracellular vesicular exosome;GO:0044464,cell part;GO:0043230,extracellular organelle;GO:0043227,membrane-bounded organelle;GO:0045111,intermediate filament cytoskeleton;GO:0043232,intracellular non-membrane-bounded organelle;GO:0044421,extracellular region part;GO:…
107	sp|P05976|MYL1_HUMAN	Myosin light chain 1/3, skeletal muscle isoform OS=Homo sapiens GN=MYL1 PE=2 SV=3	down	0.582998	0.00785833	multicellular organismal process;cellular process	organelle;macromolecular complex;cell part;cell;organelle part	structural molecule activity;binding	Signal transduction mechanisms ; Cytoskeleton ; Cell cycle control, cell division, chromosome partitioning ; General function prediction only ;		GO:0070252,actin-mediated cell contraction;GO:0003015,heart process;GO:0060048,cardiac muscle contraction;GO:0003012,muscle system process;GO:0006941,striated muscle contraction;GO:0046907,intracellular transport;GO:0003013,circulatory system process;GO:0051641,cellular localization;GO:0008015,blood circulation;GO:0060047,heart contraction;GO:0030029,actin filament-based process;GO:0030705,cytosk…	GO:0043229,intracellular organelle;GO:0044446,intracellular organelle part;GO:0044444,cytoplasmic part;GO:0030017,sarcomere;GO:0044422,organelle part;GO:0044449,contractile fiber part;GO:0015629,actin cytoskeleton;GO:0044464,cell part;GO:0043292,contractile fiber;GO:0043232,intracellular non-membrane-bounded organelle;GO:0044424,intracellular part;GO:0016459,myosin complex;GO:0043234,protein comp…	GO:0043167,ion binding;GO:0043169,cation binding;GO:0005198,structural molecule activity;GO:0046872,metal ion binding;GO:0005509,calcium ion binding;GO:0008307,structural constituent of muscle;GO:0005488,binding
108	sp|A0A075B6I0|LV861_HUMAN	Immunoglobulin lambda variable 8-61 OS=Homo sapiens GN=IGLV8-61 PE=3 SV=7	up	3.01324	0.00959907					Primary immunodeficiency
109	sp|Q99969|RARR2_HUMAN	Retinoic acid receptor responder protein 2 OS=Homo sapiens GN=RARRES2 PE=1 SV=1	down	0.240857	0.0359062	immune system process;regulation of biological process;positive regulation of biological process;developmental process;multicellular organismal process;cellular process;response to stimulus;localization;locomotion;biological regulation;metabolic process	extracellular region part;extracellular region;organelle	binding			GO:0016101,diterpenoid metabolic process;GO:0009894,regulation of catabolic process;GO:0065007,biological regulation;GO:0050793,regulation of developmental process;GO:0001934,positive regulation of protein amino acid phosphorylation;GO:0009605,response to external stimulus;GO:0045444,fat cell differentiation;GO:0006950,response to stress;GO:0048731,system development;GO:0050873,brown fat cell dif…	GO:0031982,vesicle;GO:0043226,organelle;GO:0031012,extracellular matrix;GO:0005576,extracellular region;GO:0070062,extracellular vesicular exosome;GO:0043230,extracellular organelle;GO:0065010,extracellular membrane-bounded organelle;GO:0031988,membrane-bounded vesicle;GO:0043227,membrane-bounded organelle;GO:0044421,extracellular region part	GO:0005515,protein binding;GO:0005102,receptor binding;GO:0005488,binding
110	sp|P08833|IBP1_HUMAN	Insulin-like growth factor-binding protein 1 OS=Homo sapiens GN=IGFBP1 PE=1 SV=1	down	0.244928	0.00196345	regulation of biological process;cellular component organization or biogenesis;positive regulation of biological process;developmental process;cellular process;response to stimulus;growth;signaling;negative regulation of biological process;biological regulation;metabolic process	extracellular region part;extracellular region;cell part;cell	binding		p53 signaling pathway	GO:0065007,biological regulation;GO:0034960,cellular biopolymer metabolic process;GO:0009605,response to external stimulus;GO:0007167,enzyme linked receptor protein signaling pathway;GO:0019318,hexose metabolic process;GO:0006950,response to stress;GO:0042221,response to chemical stimulus;GO:0048731,system development;GO:0042246,tissue regeneration;GO:0009719,response to endogenous stimulus;GO:00…	GO:0005615,extracellular space;GO:0005576,extracellular region;GO:0044464,cell part;GO:0005623,cell;GO:0005622,intracellular;GO:0044421,extracellular region part	GO:0031995,insulin-like growth factor II binding;GO:0005515,protein binding;GO:0005520,insulin-like growth factor binding;GO:0031994,insulin-like growth factor I binding;GO:0005102,receptor binding;GO:0005488,binding;GO:0019838,growth factor binding
111	sp|P81605|DCD_HUMAN	Dermcidin OS=Homo sapiens GN=DCD PE=1 SV=2	down	0.258245	0.0223659	multi-organism process	extracellular region part;extracellular region;organelle	binding			GO:0051704,multi-organism process	GO:0005615,extracellular space;GO:0031982,vesicle;GO:0043226,organelle;GO:0005576,extracellular region;GO:0070062,extracellular vesicular exosome;GO:0043230,extracellular organelle;GO:0065010,extracellular membrane-bounded organelle;GO:0031988,membrane-bounded vesicle;GO:0043227,membrane-bounded organelle;GO:0044421,extracellular region part	GO:0005515,protein binding;GO:0005488,binding
112	sp|Q9UM47|NOTC3_HUMAN	Neurogenic locus notch homolog protein 3 OS=Homo sapiens GN=NOTCH3 PE=1 SV=2	down	0.613987	0.0198613	reproduction;multi-organism process;positive regulation of biological process;developmental process;multicellular organismal process;cellular process;growth;signaling;viral reproduction;negative regulation of biological process;metabolic process;biological regulation;death;reproductive process;immune system process;regulation of biological process;cellular component organization or biogenesis;est…	extracellular region;organelle;macromolecular complex;cell part;cell;organelle part;membrane-enclosed lumen	enzyme regulator activity;binding;nucleic acid binding transcription factor activity	General function prediction only ;	Notch signaling pathway;Dorso-ventral axis formation;Prion diseases	GO:0007219,Notch signaling pathway;GO:0022604,regulation of cell morphogenesis;GO:0045995,regulation of embryonic development;GO:0010558,negative regulation of macromolecule biosynthetic process;GO:0031326,regulation of cellular biosynthetic process;GO:0000904,cell morphogenesis involved in differentiation;GO:0009892,negative regulation of metabolic process;GO:0043086,negative regulation of catal…	GO:0044446,intracellular organelle part;GO:0044431,Golgi apparatus part;GO:0000139,Golgi membrane;GO:0031981,nuclear lumen;GO:0031982,vesicle;GO:0044422,organelle part;GO:0043233,organelle lumen;GO:0005789,endoplasmic reticulum membrane;GO:0044464,cell part;GO:0005654,nucleoplasm;GO:0005794,Golgi apparatus;GO:0043232,intracellular non-membrane-bounded organelle;GO:0043231,intracellular membrane-b…	GO:0043169,cation binding;GO:0005515,protein binding;GO:0043566,structure-specific DNA binding;GO:0031490,chromatin DNA binding;GO:0043167,ion binding;GO:0019899,enzyme binding;GO:0003682,chromatin binding;GO:0030234,enzyme regulator activity;GO:0004857,enzyme inhibitor activity;GO:0003677,DNA binding;GO:0003676,nucleic acid binding;GO:0046872,metal ion binding;GO:0030528,transcription regulator …
113	sp|Q15848|ADIPO_HUMAN	Adiponectin OS=Homo sapiens GN=ADIPOQ PE=1 SV=1	up	10.9766	0.00468013	positive regulation of biological process;developmental process;multicellular organismal process;cellular process;signaling;negative regulation of biological process;metabolic process;biological regulation;death;immune system process;regulation of biological process;cellular component organization or biogenesis;establishment of localization;rhythmic process;cell proliferation;biological adhesion;…	extracellular region part;extracellular region;organelle;cell part;cell	binding		Adipocytokine signaling pathway;PPAR signaling pathway;Type II diabetes mellitus	GO:0032720,negative regulation of tumor necrosis factor production;GO:0045995,regulation of embryonic development;GO:0031347,regulation of defense response;GO:0010558,negative regulation of macromolecule biosynthetic process;GO:0032370,positive regulation of lipid transport;GO:0031326,regulation of cellular biosynthetic process;GO:0019221,cytokine-mediated signaling pathway;GO:0009892,negative re…	GO:0043229,intracellular organelle;GO:0044444,cytoplasmic part;GO:0005783,endoplasmic reticulum;GO:0031982,vesicle;GO:0048471,perinuclear region of cytoplasm;GO:0070062,extracellular vesicular exosome;GO:0005581,collagen;GO:0044464,cell part;GO:0043230,extracellular organelle;GO:0043227,membrane-bounded organelle;GO:0044420,extracellular matrix part;GO:0044421,extracellular region part;GO:0043231…	GO:0048029,monosaccharide binding;GO:0042803,protein homodimerization activity;GO:0042802,identical protein binding;GO:0005515,protein binding;GO:0005529,sugar binding;GO:0005125,cytokine activity;GO:0005179,hormone activity;GO:0005488,binding;GO:0046983,protein dimerization activity;GO:0005102,receptor binding;GO:0030246,carbohydrate binding;GO:0033691,sialic acid binding
114	sp|O95445|APOM_HUMAN	Apolipoprotein M OS=Homo sapiens GN=APOM PE=1 SV=2	down	0.444193	0.0479429	reproductive process;reproduction;immune system process;regulation of biological process;establishment of localization;cellular component organization or biogenesis;positive regulation of biological process;developmental process;multicellular organismal process;cellular process;response to stimulus;growth;signaling;negative regulation of biological process;localization;biological regulation;metab…	extracellular region part;organelle;cell part;membrane-enclosed lumen;extracellular region;cell;macromolecular complex;organelle part	molecular transducer activity;transporter activity;binding;catalytic activity;antioxidant activity			GO:0034960,cellular biopolymer metabolic process;GO:0050748,negative regulation of lipoprotein metabolic process;GO:0042221,response to chemical stimulus;GO:0009416,response to light stimulus;GO:0031326,regulation of cellular biosynthetic process;GO:0002252,immune effector process;GO:0000279,M phase;GO:0009892,negative regulation of metabolic process;GO:0043283,biopolymer metabolic process;GO:000…	GO:0044446,intracellular organelle part;GO:0030529,ribonucleoprotein complex;GO:0005681,spliceosomal complex;GO:0034366,spherical high-density lipoprotein particle;GO:0032994,protein-lipid complex;GO:0031981,nuclear lumen;GO:0031982,vesicle;GO:0005764,lysosome;GO:0044422,organelle part;GO:0043233,organelle lumen;GO:0070062,extracellular vesicular exosome;GO:0044464,cell part;GO:0005654,nucleoplas…	GO:0043169,cation binding;GO:0004872,receptor activity;GO:0017171,serine hydrolase activity;GO:0008289,lipid binding;GO:0016798,hydrolase activity, acting on glycosyl bonds;GO:0003824,catalytic activity;GO:0046914,transition metal ion binding;GO:0043167,ion binding;GO:0016209,antioxidant activity;GO:0060089,molecular transducer activity;GO:0004871,signal transducer activity;GO:0005543,phospholipi…
115	sp|O14791|APOL1_HUMAN	Apolipoprotein L1 OS=Homo sapiens GN=APOL1 PE=1 SV=5	down	0.648192	0.0334409	immune system process;multi-organism process;establishment of localization;cellular component organization or biogenesis;cellular process;cell killing;response to stimulus;localization;metabolic process;death	extracellular region part;extracellular region;macromolecular complex;cell part;cell	transporter activity;binding			GO:0031640,killing of cells of another organism;GO:0006950,response to stress;GO:0044238,primary metabolic process;GO:0016044,membrane organization;GO:0043170,macromolecule metabolic process;GO:0042157,lipoprotein metabolic process;GO:0006955,immune response;GO:0006066,alcohol metabolic process;GO:0002376,immune system process;GO:0016125,sterol metabolic process;GO:0006898,receptor-mediated endoc…	GO:0005615,extracellular space;GO:0032994,protein-lipid complex;GO:0005623,cell;GO:0032991,macromolecular complex;GO:0034361,very-low-density lipoprotein particle;GO:0034364,high-density lipoprotein particle;GO:0044425,membrane part;GO:0034358,plasma lipoprotein particle;GO:0005576,extracellular region;GO:0044464,cell part;GO:0016021,integral to membrane;GO:0031224,intrinsic to membrane;GO:001602…	GO:0015075,ion transmembrane transporter activity;GO:0008289,lipid binding;GO:0005515,protein binding;GO:0005216,ion channel activity;GO:0005488,binding;GO:0022838,substrate specific channel activity;GO:0015267,channel activity;GO:0022803,passive transmembrane transporter activity;GO:0005215,transporter activity;GO:0022892,substrate-specific transporter activity;GO:0022857,transmembrane transport…
116	sp|Q13103|SPP24_HUMAN	Secreted phosphoprotein 24 OS=Homo sapiens GN=SPP2 PE=1 SV=1	up	1.68383	0.0485785	regulation of biological process;cellular component organization or biogenesis;developmental process;metabolic process;biological regulation;multicellular organismal process	extracellular region part;extracellular region;organelle;macromolecular complex	enzyme regulator activity			GO:0065007,biological regulation;GO:0010926,anatomical structure formation;GO:0070271,protein complex biogenesis;GO:0032502,developmental process;GO:0050790,regulation of catalytic activity;GO:0001501,skeletal system development;GO:0048731,system development;GO:0010466,negative regulation of peptidase activity;GO:0052548,regulation of endopeptidase activity;GO:0032501,multicellular organismal pro…	GO:0043234,protein complex;GO:0032991,macromolecular complex;GO:0031982,vesicle;GO:0043226,organelle;GO:0005576,extracellular region;GO:0070062,extracellular vesicular exosome;GO:0043230,extracellular organelle;GO:0065010,extracellular membrane-bounded organelle;GO:0031988,membrane-bounded vesicle;GO:0043227,membrane-bounded organelle;GO:0044421,extracellular region part	GO:0030414,peptidase inhibitor activity;GO:0004866,endopeptidase inhibitor activity;GO:0030234,enzyme regulator activity;GO:0004857,enzyme inhibitor activity
117	sp|O43866|CD5L_HUMAN	CD5 antigen-like OS=Homo sapiens GN=CD5L PE=1 SV=1	up	2.41313	0.0177152	response to stimulus;immune system process;establishment of localization;cellular component organization or biogenesis;localization;death;cellular process	extracellular region part;extracellular region;organelle;cell part;cell	molecular transducer activity		Salivary secretion	GO:0006952,defense response;GO:0008219,cell death;GO:0009605,response to external stimulus;GO:0006950,response to stress;GO:0010324,membrane invagination;GO:0006954,inflammatory response;GO:0016044,membrane organization;GO:0051234,establishment of localization;GO:0009611,response to wounding;GO:0006968,cellular defense response;GO:0002376,immune system process;GO:0016192,vesicle-mediated transpor…	GO:0044424,intracellular part;GO:0005737,cytoplasm;GO:0005623,cell;GO:0031982,vesicle;GO:0043226,organelle;GO:0005622,intracellular;GO:0005576,extracellular region;GO:0070062,extracellular vesicular exosome;GO:0044464,cell part;GO:0043230,extracellular organelle;GO:0065010,extracellular membrane-bounded organelle;GO:0031988,membrane-bounded vesicle;GO:0043227,membrane-bounded organelle;GO:0016020…	GO:0060089,molecular transducer activity;GO:0004871,signal transducer activity;GO:0004872,receptor activity;GO:0005044,scavenger receptor activity;GO:0004888,transmembrane receptor activity

## Sheet: 115vs114
N	Accession	Name	Diff_state	115:114	PVal 115:114	GO_function(Biological_Process)	GO_function(Cellular_Component)	GO_function(Molecular_Function)	COG_function	Kegg_function	GO_enrichment(Biological_Process)	GO_enrichment(Cellular_Component)	GO_enrichment(Molecular_Function)	Kegg_enrichment
1	sp|P18428|LBP_HUMAN	Lipopolysaccharide-binding protein OS=Homo sapiens GN=LBP PE=1 SV=3	up	5.08758	0.0268841	immune system process;regulation of biological process;multi-organism process;establishment of localization;cellular component organization or biogenesis;positive regulation of biological process;developmental process;multicellular organismal process;cellular process;response to stimulus;growth;signaling;negative regulation of biological process;localization;locomotion;metabolic process;biologica…	extracellular region part;extracellular region;organelle;cell part;cell	binding		Toll-like receptor signaling pathway	GO:0002673,regulation of acute inflammatory response;GO:0016477,cell migration;GO:0031349,positive regulation of defense response;GO:0032720,negative regulation of tumor necrosis factor production;GO:0031347,regulation of defense response;GO:0060326,cell chemotaxis;GO:0042221,response to chemical stimulus;GO:0002694,regulation of leukocyte activation;GO:0045321,leukocyte activation;GO:0048731,sys…	GO:0005615,extracellular space;GO:0005623,cell;GO:0031982,vesicle;GO:0043226,organelle;GO:0009986,cell surface;GO:0005576,extracellular region;GO:0070062,extracellular vesicular exosome;GO:0044464,cell part;GO:0043230,extracellular organelle;GO:0065010,extracellular membrane-bounded organelle;GO:0043227,membrane-bounded organelle;GO:0031988,membrane-bounded vesicle;GO:0016020,membrane;GO:0044421,…	GO:0001530,lipopolysaccharide binding;GO:0005515,protein binding;GO:0005102,receptor binding;GO:0005488,binding
2	sp|Q15113|PCOC1_HUMAN	Procollagen C-endopeptidase enhancer 1 OS=Homo sapiens GN=PCOLCE PE=1 SV=2	down	0.481466	0.0137697	regulation of biological process;developmental process;metabolic process;biological regulation;multicellular organismal process	extracellular region part;extracellular region;organelle	enzyme regulator activity;binding			GO:0065007,biological regulation;GO:0032502,developmental process;GO:0050790,regulation of catalytic activity;GO:0051345,positive regulation of hydrolase activity;GO:0010952,positive regulation of peptidase activity;GO:0043085,positive regulation of catalytic activity;GO:0032501,multicellular organismal process;GO:0052547,regulation of peptidase activity;GO:0044093,positive regulation of molecula…	GO:0005615,extracellular space;GO:0005578,proteinaceous extracellular matrix;GO:0031982,vesicle;GO:0043226,organelle;GO:0031012,extracellular matrix;GO:0005576,extracellular region;GO:0070062,extracellular vesicular exosome;GO:0005581,collagen;GO:0043230,extracellular organelle;GO:0065010,extracellular membrane-bounded organelle;GO:0044420,extracellular matrix part;GO:0043227,membrane-bounded org…	GO:0016504,peptidase activator activity;GO:0005515,protein binding;GO:0030247,polysaccharide binding;GO:0005488,binding;GO:0008201,heparin binding;GO:0030234,enzyme regulator activity;GO:0008047,enzyme activator activity;GO:0005518,collagen binding;GO:0030246,carbohydrate binding;GO:0005539,glycosaminoglycan binding;GO:0001871,pattern binding
3	sp|P04433|KV311_HUMAN	Immunoglobulin kappa variable 3-11 OS=Homo sapiens GN=IGKV3-11 PE=1 SV=1	up	1.98378	0.0382599	immune system process;regulation of biological process;establishment of localization;cellular component organization or biogenesis;positive regulation of biological process;cellular process;response to stimulus;localization;biological regulation;metabolic process	extracellular region part;extracellular region;organelle;cell part;cell	binding		Primary immunodeficiency	GO:0065007,biological regulation;GO:0048583,regulation of response to stimulus;GO:0009605,response to external stimulus;GO:0006950,response to stress;GO:0048584,positive regulation of response to stimulus;GO:0044238,primary metabolic process;GO:0002252,immune effector process;GO:0002455,humoral immune response mediated by circulating immunoglobulin;GO:0016044,membrane organization;GO:0043283,biop…	GO:0005623,cell;GO:0031982,vesicle;GO:0043226,organelle;GO:0005886,plasma membrane;GO:0005576,extracellular region;GO:0070062,extracellular vesicular exosome;GO:0044464,cell part;GO:0043230,extracellular organelle;GO:0065010,extracellular membrane-bounded organelle;GO:0031988,membrane-bounded vesicle;GO:0043227,membrane-bounded organelle;GO:0016020,membrane;GO:0044421,extracellular region part	GO:0003823,antigen binding;GO:0005488,binding
4	sp|P04070|PROC_HUMAN	Vitamin K-dependent protein C OS=Homo sapiens GN=PROC PE=1 SV=1	up	7.65843	0.0138519	immune system process;regulation of biological process;establishment of localization;multicellular organismal process;cellular process;response to stimulus;negative regulation of biological process;localization;locomotion;biological regulation;metabolic process;death	extracellular region part;extracellular region;organelle;cell part;cell;organelle part;membrane-enclosed lumen	binding;catalytic activity	Posttranslational modification, protein turnover, chaperones ;	Complement and coagulation cascades	GO:0065007,biological regulation;GO:0016477,cell migration;GO:0034960,cellular biopolymer metabolic process;GO:0050793,regulation of developmental process;GO:0048870,cell motility;GO:0031347,regulation of defense response;GO:0051239,regulation of multicellular organismal process;GO:0043283,biopolymer metabolic process;GO:0043069,negative regulation of programmed cell death;GO:0060548,negative reg…	GO:0043229,intracellular organelle;GO:0044446,intracellular organelle part;GO:0005783,endoplasmic reticulum;GO:0044444,cytoplasmic part;GO:0044431,Golgi apparatus part;GO:0044422,organelle part;GO:0043233,organelle lumen;GO:0005788,endoplasmic reticulum lumen;GO:0044464,cell part;GO:0005794,Golgi apparatus;GO:0043227,membrane-bounded organelle;GO:0005796,Golgi lumen;GO:0044421,extracellular regio…	GO:0043169,cation binding;GO:0008233,peptidase activity;GO:0046872,metal ion binding;GO:0070011,peptidase activity, acting on L-amino acid peptides;GO:0017171,serine hydrolase activity;GO:0005515,protein binding;GO:0003824,catalytic activity;GO:0005488,binding;GO:0043167,ion binding;GO:0005509,calcium ion binding;GO:0008236,serine-type peptidase activity;GO:0016787,hydrolase activity;GO:0004175,e…
5	sp|P02741|CRP_HUMAN	C-reactive protein OS=Homo sapiens GN=CRP PE=1 SV=1	up	9.53923	0.0195723	immune system process;regulation of biological process;multi-organism process;establishment of localization;cellular component organization or biogenesis;positive regulation of biological process;developmental process;multicellular organismal process;cellular process;cell proliferation;response to stimulus;negative regulation of biological process;localization;biological regulation;metabolic proc…	extracellular region part;extracellular region;organelle;cell part;cell	binding		Pancreatic secretion;Proximal tubule bicarbonate reclamation;Gastric acid secretion;Collecting duct acid secretion;Nitrogen metabolism	GO:0065007,biological regulation;GO:0050793,regulation of developmental process;GO:0009617,response to bacterium;GO:0010628,positive regulation of gene expression;GO:0009605,response to external stimulus;GO:0048534,hemopoietic or lymphoid organ development;GO:0006950,response to stress;GO:0048731,system development;GO:0048584,positive regulation of response to stimulus;GO:0031326,regulation of ce…	GO:0044444,cytoplasmic part;GO:0005938,cell cortex;GO:0030175,filopodium;GO:0031982,vesicle;GO:0042995,cell projection;GO:0030426,growth cone;GO:0043005,neuron projection;GO:0070062,extracellular vesicular exosome;GO:0030427,site of polarized growth;GO:0044464,cell part;GO:0043230,extracellular organelle;GO:0043227,membrane-bounded organelle;GO:0044421,extracellular region part;GO:0005615,extrace…	GO:0043169,cation binding;GO:0008034,lipoprotein binding;GO:0042803,protein homodimerization activity;GO:0008289,lipid binding;GO:0005515,protein binding;GO:0046914,transition metal ion binding;GO:0043167,ion binding;GO:0050997,quaternary ammonium group binding;GO:0043178,alcohol binding;GO:0070325,lipoprotein receptor binding;GO:0001848,complement binding;GO:0043176,amine binding;GO:0030169,low-…
6	sp|Q14520|HABP2_HUMAN	Hyaluronan-binding protein 2 OS=Homo sapiens GN=HABP2 PE=1 SV=1	up	2.19319	0.00665266	biological adhesion;metabolic process;cellular process	extracellular region part;extracellular region	binding;catalytic activity	Posttranslational modification, protein turnover, chaperones ;		GO:0030163,protein catabolic process;GO:0043170,macromolecule metabolic process;GO:0022610,biological adhesion;GO:0019538,protein metabolic process;GO:0009057,macromolecule catabolic process;GO:0043285,biopolymer catabolic process;GO:0044238,primary metabolic process;GO:0009987,cellular process;GO:0007155,cell adhesion;GO:0006508,proteolysis;GO:0009056,catabolic process;GO:0043283,biopolymer meta…	GO:0005615,extracellular space;GO:0005576,extracellular region;GO:0044421,extracellular region part	GO:0008233,peptidase activity;GO:0070011,peptidase activity, acting on L-amino acid peptides;GO:0017171,serine hydrolase activity;GO:0003824,catalytic activity;GO:0030247,polysaccharide binding;GO:0005488,binding;GO:0008236,serine-type peptidase activity;GO:0030246,carbohydrate binding;GO:0016787,hydrolase activity;GO:0004175,endopeptidase activity;GO:0005539,glycosaminoglycan binding;GO:0001871,…
7	sp|P01876|IGHA1_HUMAN	Ig alpha-1 chain C region OS=Homo sapiens GN=IGHA1 PE=1 SV=2	down	0.439703	0.0255579	immune system process;regulation of biological process;multi-organism process;establishment of localization;cellular component organization or biogenesis;positive regulation of biological process;multicellular organismal process;cellular process;response to stimulus;signaling;localization;biological regulation;metabolic process	extracellular region part;extracellular region;organelle;macromolecular complex;cell part;cell	binding		Fc epsilon RI signaling pathway;Viral myocarditis;Primary immunodeficiency;Staphylococcus aureus infection;Natural killer cell mediated cytotoxicity;Hematopoietic cell lineage;Asthma;Leishmaniasis;Phagosome;Systemic lupus erythematosus;Fc gamma R-mediated phagocytosis;Allograft rejection;B cell receptor signaling pathway;Dilated cardiomyopathy;Autoimmune thyroid disease;Intestinal immune network …	GO:0065007,biological regulation;GO:0034960,cellular biopolymer metabolic process;GO:0009617,response to bacterium;GO:0009605,response to external stimulus;GO:0006950,response to stress;GO:0002694,regulation of leukocyte activation;GO:0048584,positive regulation of response to stimulus;GO:0009607,response to biotic stimulus;GO:0002252,immune effector process;GO:0003094,glomerular filtration;GO:00…	GO:0031982,vesicle;GO:0070062,extracellular vesicular exosome;GO:0044464,cell part;GO:0043230,extracellular organelle;GO:0043227,membrane-bounded organelle;GO:0044421,extracellular region part;GO:0005623,cell;GO:0009986,cell surface;GO:0043226,organelle;GO:0044425,membrane part;GO:0005886,plasma membrane;GO:0005576,extracellular region;GO:0009897,external side of plasma membrane;GO:0065010,extrac…	GO:0003823,antigen binding;GO:0005515,protein binding;GO:0034987,immunoglobulin receptor binding;GO:0005102,receptor binding;GO:0005488,binding
8	sp|P35579|MYH9_HUMAN	Myosin-9 OS=Homo sapiens GN=MYH9 PE=1 SV=4	up	2.99848	0.000447746	immune system process;regulation of biological process;establishment of localization;cellular component organization or biogenesis;developmental process;multicellular organismal process;cellular process;response to stimulus;biological adhesion;signaling;negative regulation of biological process;localization;locomotion;metabolic process;biological regulation	extracellular region part;organelle;cell part;extracellular region;synapse;cell;macromolecular complex;organelle part	transporter activity;binding;catalytic activity	Cytoskeleton ;	Vascular smooth muscle contraction;Regulation of actin cytoskeleton;Viral myocarditis;Dilated cardiomyopathy;Tight junction;Hypertrophic cardiomyopathy (HCM);Cardiac muscle contraction	GO:0016477,cell migration;GO:0048747,muscle fiber development;GO:0007517,muscle organ development;GO:0022604,regulation of cell morphogenesis;GO:0045321,leukocyte activation;GO:0048731,system development;GO:0030097,hemopoiesis;GO:0000279,M phase;GO:0000904,cell morphogenesis involved in differentiation;GO:0009892,negative regulation of metabolic process;GO:0016044,membrane organization;GO:0043283…	GO:0044446,intracellular organelle part;GO:0001725,stress fiber;GO:0005938,cell cortex;GO:0031982,vesicle;GO:0001726,ruffle;GO:0044422,organelle part;GO:0070062,extracellular vesicular exosome;GO:0044464,cell part;GO:0005911,cell-cell junction;GO:0043232,intracellular non-membrane-bounded organelle;GO:0043231,intracellular membrane-bounded organelle;GO:0016459,myosin complex;GO:0030055,cell-subst…	GO:0001883,purine nucleoside binding;GO:0017111,nucleoside-triphosphatase activity;GO:0043492,ATPase activity, coupled to movement of substances;GO:0005515,protein binding;GO:0000146,microfilament motor activity;GO:0003774,motor activity;GO:0022857,transmembrane transporter activity;GO:0022804,active transmembrane transporter activity;GO:0051015,actin filament binding;GO:0016817,hydrolase activit…
9	sp|P21926|CD9_HUMAN	CD9 antigen OS=Homo sapiens GN=CD9 PE=1 SV=4	up	1.92351	0.0262125	reproductive process;reproduction;regulation of biological process;establishment of localization;cellular component organization or biogenesis;developmental process;multicellular organismal process;cellular process;cell proliferation;response to stimulus;biological adhesion;signaling;negative regulation of biological process;localization;biological regulation;metabolic process	extracellular region part;extracellular region;organelle;cell part;cell;organelle part	binding		Hematopoietic cell lineage	GO:0065007,biological regulation;GO:0050801,ion homeostasis;GO:0009605,response to external stimulus;GO:0006950,response to stress;GO:0042221,response to chemical stimulus;GO:0048731,system development;GO:0002576,platelet degranulation;GO:0019725,cellular homeostasis;GO:0032940,secretion by cell;GO:0008285,negative regulation of cell proliferation;GO:0007154,cell communication;GO:0016044,membrane…	GO:0044446,intracellular organelle part;GO:0030136,clathrin-coated vesicle;GO:0031982,vesicle;GO:0044422,organelle part;GO:0070062,extracellular vesicular exosome;GO:0044464,cell part;GO:0043231,intracellular membrane-bounded organelle;GO:0030055,cell-substrate junction;GO:0005623,cell;GO:0030141,secretory granule;GO:0044425,membrane part;GO:0005912,adherens junction;GO:0012505,endomembrane syste…	GO:0005178,integrin binding;GO:0032403,protein complex binding;GO:0005515,protein binding;GO:0005102,receptor binding;GO:0005488,binding
10	sp|Q15166|PON3_HUMAN	Serum paraoxonase/lactonase 3 OS=Homo sapiens GN=PON3 PE=1 SV=3	down	0.433604	0.00578864	response to stimulus;regulation of biological process;negative regulation of biological process;metabolic process;biological regulation;cellular process	extracellular region part;extracellular region;organelle;cell part;cell	binding;catalytic activity		Metabolic pathways;Microbial metabolism in diverse environments	GO:0065007,biological regulation;GO:0009605,response to external stimulus;GO:0042221,response to chemical stimulus;GO:0044238,primary metabolic process;GO:0046483,heterocycle metabolic process;GO:0031324,negative regulation of cellular metabolic process;GO:0009892,negative regulation of metabolic process;GO:0046700,heterocycle catabolic process;GO:0080010,regulation of oxygen and reactive oxygen …	GO:0043229,intracellular organelle;GO:0031982,vesicle;GO:0070062,extracellular vesicular exosome;GO:0044464,cell part;GO:0043230,extracellular organelle;GO:0043227,membrane-bounded organelle;GO:0044421,extracellular region part;GO:0005615,extracellular space;GO:0043231,intracellular membrane-bounded organelle;GO:0044424,intracellular part;GO:0005623,cell;GO:0043226,organelle;GO:0005622,intracellu…	GO:0043169,cation binding;GO:0046872,metal ion binding;GO:0042803,protein homodimerization activity;GO:0042802,identical protein binding;GO:0005515,protein binding;GO:0003824,catalytic activity;GO:0004064,arylesterase activity;GO:0042578,phosphoric ester hydrolase activity;GO:0016788,hydrolase activity, acting on ester bonds;GO:0005488,binding;GO:0046983,protein dimerization activity;GO:0043167,i…
11	sp|P02748|CO9_HUMAN	Complement component C9 OS=Homo sapiens GN=C9 PE=1 SV=2	down	0.0525609	0.000705914	immune system process;regulation of biological process;multi-organism process;positive regulation of biological process;multicellular organismal process;cell killing;response to stimulus;biological regulation;metabolic process	extracellular region part;extracellular region;organelle;macromolecular complex;cell part;cell			Complement and coagulation cascades;Systemic lupus erythematosus;Prion diseases;Amoebiasis	GO:0009894,regulation of catabolic process;GO:0002673,regulation of acute inflammatory response;GO:0065007,biological regulation;GO:0009605,response to external stimulus;GO:0031347,regulation of defense response;GO:0006950,response to stress;GO:0048584,positive regulation of response to stimulus;GO:0002252,immune effector process;GO:0030449,regulation of complement activation;GO:0043283,biopolyme…	GO:0031982,vesicle;GO:0070062,extracellular vesicular exosome;GO:0044464,cell part;GO:0043230,extracellular organelle;GO:0016021,integral to membrane;GO:0043227,membrane-bounded organelle;GO:0044421,extracellular region part;GO:0044424,intracellular part;GO:0043234,protein complex;GO:0005737,cytoplasm;GO:0005623,cell;GO:0032991,macromolecular complex;GO:0044425,membrane part;GO:0005579,membrane a…
12	sp|P01009|A1AT_HUMAN	Alpha-1-antitrypsin OS=Homo sapiens GN=SERPINA1 PE=1 SV=3	down	0.396883	0.00876117	response to stimulus;regulation of biological process;establishment of localization;cellular component organization or biogenesis;localization;metabolic process;biological regulation;multicellular organismal process;cellular process	extracellular region part;extracellular region;organelle;cell part;cell;organelle part;membrane-enclosed lumen	enzyme regulator activity;binding	Posttranslational modification, protein turnover, chaperones ;	Complement and coagulation cascades	GO:0065007,biological regulation;GO:0034960,cellular biopolymer metabolic process;GO:0009605,response to external stimulus;GO:0006950,response to stress;GO:0002576,platelet degranulation;GO:0052548,regulation of endopeptidase activity;GO:0032940,secretion by cell;GO:0016044,membrane organization;GO:0043283,biopolymer metabolic process;GO:0043413,biopolymer glycosylation;GO:0043086,negative regula…	GO:0044446,intracellular organelle part;GO:0044431,Golgi apparatus part;GO:0000139,Golgi membrane;GO:0031982,vesicle;GO:0044422,organelle part;GO:0043233,organelle lumen;GO:0070062,extracellular vesicular exosome;GO:0044464,cell part;GO:0005794,Golgi apparatus;GO:0043231,intracellular membrane-bounded organelle;GO:0031974,membrane-enclosed lumen;GO:0005623,cell;GO:0030141,secretory granule;GO:004…	GO:0001948,glycoprotein binding;GO:0042802,identical protein binding;GO:0005515,protein binding;GO:0005488,binding;GO:0004867,serine-type endopeptidase inhibitor activity;GO:0019899,enzyme binding;GO:0002020,protease binding;GO:0004866,endopeptidase inhibitor activity;GO:0030414,peptidase inhibitor activity;GO:0030234,enzyme regulator activity;GO:0004857,enzyme inhibitor activity
13	sp|P07900|HS90A_HUMAN	Heat shock protein HSP 90-alpha OS=Homo sapiens GN=HSP90AA1 PE=1 SV=5	up	2.89759	0.0283312	immune system process;regulation of biological process;establishment of localization;cellular component organization or biogenesis;positive regulation of biological process;developmental process;multicellular organismal process;cellular process;response to stimulus;signaling;localization;locomotion;metabolic process;biological regulation	extracellular region part;extracellular region;organelle;cell part;cell;organelle part;membrane-enclosed lumen	enzyme regulator activity;binding;catalytic activity	Posttranslational modification, protein turnover, chaperones ;	Antigen processing and presentation;NOD-like receptor signaling pathway;Progesterone-mediated oocyte maturation;Prostate cancer;Pathways in cancer;Protein processing in endoplasmic reticulum	GO:0034960,cellular biopolymer metabolic process;GO:0042221,response to chemical stimulus;GO:0048731,system development;GO:0031326,regulation of cellular biosynthetic process;GO:0000278,mitotic cell cycle;GO:0000904,cell morphogenesis involved in differentiation;GO:0016044,membrane organization;GO:0043283,biopolymer metabolic process;GO:0022008,neurogenesis;GO:0051325,interphase;GO:0006955,immune…	GO:0044446,intracellular organelle part;GO:0043209,myelin sheath;GO:0031981,nuclear lumen;GO:0031256,leading edge membrane;GO:0031982,vesicle;GO:0001726,ruffle;GO:0005764,lysosome;GO:0044422,organelle part;GO:0043233,organelle lumen;GO:0070062,extracellular vesicular exosome;GO:0044464,cell part;GO:0044463,cell projection part;GO:0005654,nucleoplasm;GO:0043231,intracellular membrane-bounded organ…	GO:0032553,ribonucleotide binding;GO:0001883,purine nucleoside binding;GO:0017111,nucleoside-triphosphatase activity;GO:0042803,protein homodimerization activity;GO:0005515,protein binding;GO:0003824,catalytic activity;GO:0019904,protein domain specific binding;GO:0019899,enzyme binding;GO:0032559,adenyl ribonucleotide binding;GO:0051020,GTPase binding;GO:0030234,enzyme regulator activity;GO:0042…
14	sp|P02766|TTHY_HUMAN	Transthyretin OS=Homo sapiens GN=TTR PE=1 SV=1	down	0.247935	0.0177304	regulation of biological process;establishment of localization;cellular component organization or biogenesis;cellular process;response to stimulus;signaling;localization;biological regulation;metabolic process	extracellular region part;extracellular region;organelle;macromolecular complex;cell part;cell	binding	General function prediction only ;	Metabolic pathways;Microbial metabolism in diverse environments;Purine metabolism	GO:0050877,neurological system process;GO:0016101,diterpenoid metabolic process;GO:0065007,biological regulation;GO:0009584,detection of visible light;GO:0034960,cellular biopolymer metabolic process;GO:0015837,amine transport;GO:0009605,response to external stimulus;GO:0007600,sensory perception;GO:0009416,response to light stimulus;GO:0009583,detection of light stimulus;GO:0044238,primary metab…	GO:0031982,vesicle;GO:0070062,extracellular vesicular exosome;GO:0044464,cell part;GO:0043230,extracellular organelle;GO:0043227,membrane-bounded organelle;GO:0044421,extracellular region part;GO:0005615,extracellular space;GO:0043234,protein complex;GO:0044424,intracellular part;GO:0005737,cytoplasm;GO:0032991,macromolecular complex;GO:0005623,cell;GO:0043226,organelle;GO:0005622,intracellular;G…	GO:0042562,hormone binding;GO:0042802,identical protein binding;GO:0005515,protein binding;GO:0005102,receptor binding;GO:0046982,protein heterodimerization activity;GO:0005179,hormone activity;GO:0005488,binding;GO:0046983,protein dimerization activity
15	sp|P27918|PROP_HUMAN	Properdin OS=Homo sapiens GN=CFP PE=1 SV=2	down	0.424622	0.0138615	immune system process;regulation of biological process;multi-organism process;positive regulation of biological process;cellular process;response to stimulus;biological regulation;metabolic process	extracellular region part;extracellular region;organelle;cell part;cell;organelle part;membrane-enclosed lumen			Axon guidance	GO:0009894,regulation of catabolic process;GO:0002673,regulation of acute inflammatory response;GO:0065007,biological regulation;GO:0034960,cellular biopolymer metabolic process;GO:0009617,response to bacterium;GO:0009605,response to external stimulus;GO:0031347,regulation of defense response;GO:0006950,response to stress;GO:0048584,positive regulation of response to stimulus;GO:0009607,response …	GO:0043229,intracellular organelle;GO:0044446,intracellular organelle part;GO:0005783,endoplasmic reticulum;GO:0044444,cytoplasmic part;GO:0044422,organelle part;GO:0043233,organelle lumen;GO:0005788,endoplasmic reticulum lumen;GO:0044464,cell part;GO:0043227,membrane-bounded organelle;GO:0044421,extracellular region part;GO:0005615,extracellular space;GO:0043231,intracellular membrane-bounded or…
16	sp|P01042|KNG1_HUMAN	Kininogen-1 OS=Homo sapiens GN=KNG1 PE=1 SV=2	down	0.198152	0.00790284	regulation of biological process;establishment of localization;positive regulation of biological process;multicellular organismal process;cellular process;response to stimulus;biological adhesion;negative regulation of biological process;localization;biological regulation;metabolic process;death	extracellular region part;extracellular region;organelle;cell part;cell;organelle part;membrane-enclosed lumen	enzyme regulator activity;binding		Complement and coagulation cascades	GO:0065007,biological regulation;GO:0050801,ion homeostasis;GO:0050793,regulation of developmental process;GO:0009605,response to external stimulus;GO:0006950,response to stress;GO:0002576,platelet degranulation;GO:0052548,regulation of endopeptidase activity;GO:0007162,negative regulation of cell adhesion;GO:0019725,cellular homeostasis;GO:0032940,secretion by cell;GO:0051239,regulation of multi…	GO:0044446,intracellular organelle part;GO:0031982,vesicle;GO:0044422,organelle part;GO:0043233,organelle lumen;GO:0070062,extracellular vesicular exosome;GO:0044464,cell part;GO:0043231,intracellular membrane-bounded organelle;GO:0031974,membrane-enclosed lumen;GO:0005623,cell;GO:0030141,secretory granule;GO:0005576,extracellular region;GO:0065010,extracellular membrane-bounded organelle;GO:0031…	GO:0043169,cation binding;GO:0005515,protein binding;GO:0030247,polysaccharide binding;GO:0046914,transition metal ion binding;GO:0043167,ion binding;GO:0030234,enzyme regulator activity;GO:0004857,enzyme inhibitor activity;GO:0005539,glycosaminoglycan binding;GO:0001871,pattern binding;GO:0046872,metal ion binding;GO:0005488,binding;GO:0008270,zinc ion binding;GO:0008201,heparin binding;GO:00051…
17	sp|P02776|PLF4_HUMAN	Platelet factor 4 OS=Homo sapiens GN=PF4 PE=1 SV=2	up	3.90964	0.0026213	immune system process;regulation of biological process;multi-organism process;establishment of localization;positive regulation of biological process;developmental process;multicellular organismal process;cellular process;cell proliferation;response to stimulus;signaling;negative regulation of biological process;localization;locomotion;metabolic process;biological regulation;death	extracellular region part;extracellular region;organelle;cell part;cell;organelle part;membrane-enclosed lumen	binding		Chemokine signaling pathway;Cytokine-cytokine receptor interaction	GO:0010628,positive regulation of gene expression;GO:0045893,positive regulation of transcription, DNA-dependent;GO:0010558,negative regulation of macromolecule biosynthetic process;GO:0042221,response to chemical stimulus;GO:0002576,platelet degranulation;GO:0031326,regulation of cellular biosynthetic process;GO:0019221,cytokine-mediated signaling pathway;GO:0032940,secretion by cell;GO:0051239,…	GO:0043229,intracellular organelle;GO:0044446,intracellular organelle part;GO:0044444,cytoplasmic part;GO:0031091,platelet alpha granule;GO:0031982,vesicle;GO:0044422,organelle part;GO:0043233,organelle lumen;GO:0044433,cytoplasmic vesicle part;GO:0044464,cell part;GO:0060205,cytoplasmic membrane-bounded vesicle lumen;GO:0043227,membrane-bounded organelle;GO:0044421,extracellular region part;GO:0…	GO:0001664,G-protein-coupled receptor binding;GO:0005515,protein binding;GO:0005125,cytokine activity;GO:0030247,polysaccharide binding;GO:0005488,binding;GO:0008009,chemokine activity;GO:0045236,CXCR chemokine receptor binding;GO:0008201,heparin binding;GO:0042379,chemokine receptor binding;GO:0005102,receptor binding;GO:0030246,carbohydrate binding;GO:0005539,glycosaminoglycan binding;GO:000187…
18	sp|Q76LX8|ATS13_HUMAN	A disintegrin and metalloproteinase with thrombospondin motifs 13 OS=Homo sapiens GN=ADAMTS13 PE=1 SV=1	down	0.565958	0.0414399	immune system process;regulation of biological process;multicellular organismal process;cellular process;biological adhesion;response to stimulus;signaling;biological regulation;metabolic process	extracellular region part;extracellular region;organelle;cell part;cell;organelle part;membrane-enclosed lumen	binding;catalytic activity			GO:0065007,biological regulation;GO:0007160,cell-matrix adhesion;GO:0034960,cellular biopolymer metabolic process;GO:0009605,response to external stimulus;GO:0006950,response to stress;GO:0034097,response to cytokine stimulus;GO:0042221,response to chemical stimulus;GO:0044238,primary metabolic process;GO:0007154,cell communication;GO:0043283,biopolymer metabolic process;GO:0016485,protein proces…	GO:0043229,intracellular organelle;GO:0044446,intracellular organelle part;GO:0005783,endoplasmic reticulum;GO:0044444,cytoplasmic part;GO:0044422,organelle part;GO:0043233,organelle lumen;GO:0005788,endoplasmic reticulum lumen;GO:0044464,cell part;GO:0043227,membrane-bounded organelle;GO:0044421,extracellular region part;GO:0005615,extracellular space;GO:0043231,intracellular membrane-bounded or…	GO:0043169,cation binding;GO:0005178,integrin binding;GO:0032403,protein complex binding;GO:0005515,protein binding;GO:0003824,catalytic activity;GO:0046914,transition metal ion binding;GO:0008237,metallopeptidase activity;GO:0043167,ion binding;GO:0046872,metal ion binding;GO:0008233,peptidase activity;GO:0070011,peptidase activity, acting on L-amino acid peptides;GO:0005488,binding;GO:0008270,z…
19	sp|B9A064|IGLL5_HUMAN	Immunoglobulin lambda-like polypeptide 5 OS=Homo sapiens GN=IGLL5 PE=2 SV=2	down	0.327172	0.0308573	immune system process;regulation of biological process;multi-organism process;establishment of localization;cellular component organization or biogenesis;positive regulation of biological process;multicellular organismal process;cellular process;response to stimulus;signaling;localization;biological regulation;metabolic process	extracellular region part;extracellular region;organelle;macromolecular complex;cell part;cell	binding		Primary immunodeficiency	GO:0065007,biological regulation;GO:0009617,response to bacterium;GO:0009605,response to external stimulus;GO:0006950,response to stress;GO:0002694,regulation of leukocyte activation;GO:0048584,positive regulation of response to stimulus;GO:0009607,response to biotic stimulus;GO:0002252,immune effector process;GO:0007154,cell communication;GO:0016044,membrane organization;GO:0043283,biopolymer me…	GO:0031982,vesicle;GO:0070062,extracellular vesicular exosome;GO:0044464,cell part;GO:0043230,extracellular organelle;GO:0043227,membrane-bounded organelle;GO:0044421,extracellular region part;GO:0005615,extracellular space;GO:0019814,immunoglobulin complex;GO:0043234,protein complex;GO:0005623,cell;GO:0032991,macromolecular complex;GO:0009986,cell surface;GO:0043226,organelle;GO:0044425,membrane…	GO:0003823,antigen binding;GO:0005515,protein binding;GO:0034987,immunoglobulin receptor binding;GO:0005102,receptor binding;GO:0005488,binding
20	sp|Q92496|FHR4_HUMAN	Complement factor H-related protein 4 OS=Homo sapiens GN=CFHR4 PE=1 SV=3	down	0.556905	0.0467553	establishment of localization;localization	extracellular region part;extracellular region;organelle	transporter activity		Complement and coagulation cascades;Staphylococcus aureus infection	GO:0051234,establishment of localization;GO:0006810,transport;GO:0006869,lipid transport;GO:0051179,localization	GO:0031982,vesicle;GO:0043226,organelle;GO:0005576,extracellular region;GO:0070062,extracellular vesicular exosome;GO:0043230,extracellular organelle;GO:0065010,extracellular membrane-bounded organelle;GO:0031988,membrane-bounded vesicle;GO:0043227,membrane-bounded organelle;GO:0044421,extracellular region part	GO:0005319,lipid transporter activity;GO:0022892,substrate-specific transporter activity;GO:0005215,transporter activity
21	sp|P08567|PLEK_HUMAN	Pleckstrin OS=Homo sapiens GN=PLEK PE=1 SV=3	up	3.21669	0.00243332	immune system process;regulation of biological process;establishment of localization;cellular component organization or biogenesis;positive regulation of biological process;developmental process;multicellular organismal process;cellular process;response to stimulus;biological adhesion;signaling;negative regulation of biological process;localization;biological regulation;metabolic process	extracellular region;cell part;cell	binding		Adherens junction	GO:0035303,regulation of dephosphorylation;GO:0048731,system development;GO:0002576,platelet degranulation;GO:0031326,regulation of cellular biosynthetic process;GO:0043243,positive regulation of protein complex disassembly;GO:0030097,hemopoiesis;GO:0032940,secretion by cell;GO:0051239,regulation of multicellular organismal process;GO:0009892,negative regulation of metabolic process;GO:0043086,ne…	GO:0044444,cytoplasmic part;GO:0031256,leading edge membrane;GO:0042995,cell projection;GO:0001726,ruffle;GO:0044464,cell part;GO:0044463,cell projection part;GO:0044424,intracellular part;GO:0032587,ruffle membrane;GO:0005737,cytoplasm;GO:0031253,cell projection membrane;GO:0005623,cell;GO:0044425,membrane part;GO:0005829,cytosol;GO:0005622,intracellular;GO:0005886,plasma membrane;GO:0031252,cel…	GO:0019901,protein kinase binding;GO:0042803,protein homodimerization activity;GO:0008289,lipid binding;GO:0042802,identical protein binding;GO:0005515,protein binding;GO:0005488,binding;GO:0046983,protein dimerization activity;GO:0005543,phospholipid binding;GO:0019899,enzyme binding;GO:0019900,kinase binding;GO:0005080,protein kinase C binding
22	sp|Q9Y6R7|FCGBP_HUMAN	IgGFc-binding protein OS=Homo sapiens GN=FCGBP PE=1 SV=3	down	0.372127	0.0342967		extracellular region part;extracellular region;organelle	binding		Amoebiasis;Vibrio cholerae infection		GO:0031982,vesicle;GO:0043226,organelle;GO:0005576,extracellular region;GO:0070062,extracellular vesicular exosome;GO:0043230,extracellular organelle;GO:0065010,extracellular membrane-bounded organelle;GO:0031988,membrane-bounded vesicle;GO:0043227,membrane-bounded organelle;GO:0044421,extracellular region part	GO:0005515,protein binding;GO:0005488,binding
23	sp|P08254|MMP3_HUMAN	Stromelysin-1 OS=Homo sapiens GN=MMP3 PE=1 SV=2	up	7.36324	0.00221517	regulation of biological process;cellular component organization or biogenesis;positive regulation of biological process;multicellular organismal process;cellular process;response to stimulus;signaling;negative regulation of biological process;localization;locomotion;biological regulation;metabolic process	extracellular region part;extracellular region;organelle;macromolecular complex;cell part;cell	binding;catalytic activity			GO:0065007,biological regulation;GO:0010627,regulation of protein kinase cascade;GO:0032459,regulation of protein oligomerization;GO:0044238,primary metabolic process;GO:0031324,negative regulation of cellular metabolic process;GO:0043062,extracellular structure organization;GO:0030574,collagen catabolic process;GO:0009892,negative regulation of metabolic process;GO:0043283,biopolymer metabolic p…	GO:0043229,intracellular organelle;GO:0044444,cytoplasmic part;GO:0042995,cell projection;GO:0043005,neuron projection;GO:0044464,cell part;GO:0043227,membrane-bounded organelle;GO:0044421,extracellular region part;GO:0005615,extracellular space;GO:0043231,intracellular membrane-bounded organelle;GO:0044424,intracellular part;GO:0043234,protein complex;GO:0005739,mitochondrion;GO:0005737,cytoplas…	GO:0043169,cation binding;GO:0032403,protein complex binding;GO:0005515,protein binding;GO:0003824,catalytic activity;GO:0046914,transition metal ion binding;GO:0008237,metallopeptidase activity;GO:0043167,ion binding;GO:0046872,metal ion binding;GO:0008233,peptidase activity;GO:0070011,peptidase activity, acting on L-amino acid peptides;GO:0005488,binding;GO:0008270,zinc ion binding;GO:0005509,c…
24	sp|P17936|IBP3_HUMAN	Insulin-like growth factor-binding protein 3 OS=Homo sapiens GN=IGFBP3 PE=1 SV=2	down	0.20528	0.0109012	regulation of biological process;cellular component organization or biogenesis;positive regulation of biological process;developmental process;multicellular organismal process;cellular process;cell proliferation;response to stimulus;growth;signaling;negative regulation of biological process;localization;locomotion;metabolic process;biological regulation;death	extracellular region part;organelle;cell part;membrane-enclosed lumen;extracellular region;cell;macromolecular complex;organelle part	enzyme regulator activity;binding		p53 signaling pathway	GO:0065007,biological regulation;GO:0010740,positive regulation of protein kinase cascade;GO:0050793,regulation of developmental process;GO:0001649,osteoblast differentiation;GO:0042221,response to chemical stimulus;GO:0048731,system development;GO:0009719,response to endogenous stimulus;GO:0031324,negative regulation of cellular metabolic process;GO:0051239,regulation of multicellular organismal…	GO:0043229,intracellular organelle;GO:0044446,intracellular organelle part;GO:0031982,vesicle;GO:0044422,organelle part;GO:0070062,extracellular vesicular exosome;GO:0044464,cell part;GO:0043230,extracellular organelle;GO:0043227,membrane-bounded organelle;GO:0043232,intracellular non-membrane-bounded organelle;GO:0044421,extracellular region part;GO:0005615,extracellular space;GO:0043231,intrace…	GO:0043169,cation binding;GO:0046872,metal ion binding;GO:0001968,fibronectin binding;GO:0005515,protein binding;GO:0005488,binding;GO:0043167,ion binding;GO:0031995,insulin-like growth factor II binding;GO:0005520,insulin-like growth factor binding;GO:0031994,insulin-like growth factor I binding;GO:0030234,enzyme regulator activity;GO:0008047,enzyme activator activity;GO:0019838,growth factor bi…
25	sp|P67936|TPM4_HUMAN	Tropomyosin alpha-4 chain OS=Homo sapiens GN=TPM4 PE=1 SV=3	up	3.78648	0.00206365	cellular component organization or biogenesis;developmental process;multicellular organismal process;cellular process	extracellular region part;extracellular region;organelle;macromolecular complex;cell part;cell;organelle part	structural molecule activity;binding		Dilated cardiomyopathy;Hypertrophic cardiomyopathy (HCM);Cardiac muscle contraction	GO:0007517,muscle organ development;GO:0030239,myofibril assembly;GO:0042692,muscle cell differentiation;GO:0046907,intracellular transport;GO:0001649,osteoblast differentiation;GO:0048731,system development;GO:0009888,tissue development;GO:0030705,cytoskeleton-dependent intracellular transport;GO:0030029,actin filament-based process;GO:0060537,muscle tissue development;GO:0060348,bone developmen…	GO:0044446,intracellular organelle part;GO:0001725,stress fiber;GO:0005938,cell cortex;GO:0030017,sarcomere;GO:0031982,vesicle;GO:0044422,organelle part;GO:0070062,extracellular vesicular exosome;GO:0044464,cell part;GO:0043232,intracellular non-membrane-bounded organelle;GO:0030055,cell-substrate junction;GO:0005623,cell;GO:0044425,membrane part;GO:0005912,adherens junction;GO:0005576,extracellu…	GO:0005198,structural molecule activity;GO:0043167,ion binding;GO:0043169,cation binding;GO:0046872,metal ion binding;GO:0005515,protein binding;GO:0008307,structural constituent of muscle;GO:0005488,binding
26	sp|P01860|IGHG3_HUMAN	Ig gamma-3 chain C region OS=Homo sapiens GN=IGHG3 PE=1 SV=2	down	0.605491	0.0236256	immune system process;regulation of biological process;multi-organism process;establishment of localization;cellular component organization or biogenesis;positive regulation of biological process;multicellular organismal process;cellular process;response to stimulus;signaling;localization;biological regulation;metabolic process	extracellular region part;extracellular region;organelle;macromolecular complex;cell part;cell	binding		Fc epsilon RI signaling pathway;Viral myocarditis;Primary immunodeficiency;Staphylococcus aureus infection;Natural killer cell mediated cytotoxicity;Hematopoietic cell lineage;Asthma;Leishmaniasis;Phagosome;Systemic lupus erythematosus;Fc gamma R-mediated phagocytosis;Allograft rejection;B cell receptor signaling pathway;Dilated cardiomyopathy;Autoimmune thyroid disease;Intestinal immune network …	GO:0065007,biological regulation;GO:0009617,response to bacterium;GO:0009605,response to external stimulus;GO:0006950,response to stress;GO:0002694,regulation of leukocyte activation;GO:0048584,positive regulation of response to stimulus;GO:0009607,response to biotic stimulus;GO:0002252,immune effector process;GO:0007154,cell communication;GO:0016044,membrane organization;GO:0043283,biopolymer me…	GO:0031982,vesicle;GO:0070062,extracellular vesicular exosome;GO:0044464,cell part;GO:0043230,extracellular organelle;GO:0043227,membrane-bounded organelle;GO:0044421,extracellular region part;GO:0005615,extracellular space;GO:0019814,immunoglobulin complex;GO:0043234,protein complex;GO:0005623,cell;GO:0032991,macromolecular complex;GO:0009986,cell surface;GO:0043226,organelle;GO:0044425,membrane…	GO:0003823,antigen binding;GO:0005515,protein binding;GO:0034987,immunoglobulin receptor binding;GO:0005102,receptor binding;GO:0005488,binding
27	sp|P01861|IGHG4_HUMAN	Ig gamma-4 chain C region OS=Homo sapiens GN=IGHG4 PE=1 SV=1	up	2.57581	0.0190796					Fc epsilon RI signaling pathway;Viral myocarditis;Primary immunodeficiency;Staphylococcus aureus infection;Natural killer cell mediated cytotoxicity;Hematopoietic cell lineage;Asthma;Leishmaniasis;Phagosome;Systemic lupus erythematosus;Fc gamma R-mediated phagocytosis;Allograft rejection;B cell receptor signaling pathway;Dilated cardiomyopathy;Autoimmune thyroid disease;Intestinal immune network …
28	sp|P07996|TSP1_HUMAN	Thrombospondin-1 OS=Homo sapiens GN=THBS1 PE=1 SV=2	up	1.68787	6.01e-05	positive regulation of biological process;developmental process;multicellular organismal process;cellular process;growth;signaling;negative regulation of biological process;metabolic process;biological regulation;death;immune system process;regulation of biological process;cellular component organization or biogenesis;establishment of localization;cell proliferation;response to stimulus;biologica…	extracellular region part;organelle;cell part;membrane-enclosed lumen;extracellular region;cell;macromolecular complex;organelle part	binding		Phagosome;ECM-receptor interaction;p53 signaling pathway;Focal adhesion;Malaria;Bladder cancer;TGF-beta signaling pathway	GO:0002576,platelet degranulation;GO:0018149,peptide cross-linking;GO:0031326,regulation of cellular biosynthetic process;GO:0052548,regulation of endopeptidase activity;GO:0032908,regulation of transforming growth factor-beta1 production;GO:0001952,regulation of cell-matrix adhesion;GO:0009892,negative regulation of metabolic process;GO:0016044,membrane organization;GO:0043086,negative regulatio…	GO:0044446,intracellular organelle part;GO:0031982,vesicle;GO:0044422,organelle part;GO:0043233,organelle lumen;GO:0070062,extracellular vesicular exosome;GO:0044464,cell part;GO:0016528,sarcoplasm;GO:0043231,intracellular membrane-bounded organelle;GO:0031974,membrane-enclosed lumen;GO:0005623,cell;GO:0030141,secretory granule;GO:0044425,membrane part;GO:0005576,extracellular region;GO:0009897,e…	GO:0043169,cation binding;GO:0008034,lipoprotein binding;GO:0001968,fibronectin binding;GO:0005178,integrin binding;GO:0008289,lipid binding;GO:0032403,protein complex binding;GO:0005515,protein binding;GO:0030247,polysaccharide binding;GO:0050840,extracellular matrix binding;GO:0043167,ion binding;GO:0005543,phospholipid binding;GO:0030169,low-density lipoprotein binding;GO:0019838,growth factor…
29	sp|P49908|SEPP1_HUMAN	Selenoprotein P OS=Homo sapiens GN=SELENOP PE=1 SV=3	up	1.67285	0.00107601	response to stimulus;reproduction;growth;developmental process;metabolic process;multicellular organismal process;cellular process	extracellular region part;extracellular region;organelle;cell part;cell	binding			GO:0007417,central nervous system development;GO:0010269,response to selenium ion;GO:0032502,developmental process;GO:0006950,response to stress;GO:0042221,response to chemical stimulus;GO:0048731,system development;GO:0010038,response to metal ion;GO:0032501,multicellular organismal process;GO:0007626,locomotory behavior;GO:0009791,post-embryonic development;GO:0040007,growth;GO:0044237,cellular…	GO:0031982,vesicle;GO:0070062,extracellular vesicular exosome;GO:0044464,cell part;GO:0043230,extracellular organelle;GO:0016021,integral to membrane;GO:0043227,membrane-bounded organelle;GO:0044421,extracellular region part;GO:0005615,extracellular space;GO:0005623,cell;GO:0043226,organelle;GO:0044425,membrane part;GO:0005576,extracellular region;GO:0065010,extracellular membrane-bounded organel…	GO:0008430,selenium binding;GO:0005488,binding
30	sp|P02774|VTDB_HUMAN	Vitamin D-binding protein OS=Homo sapiens GN=GC PE=1 SV=1	up	2.38145	0.00457186	reproductive process;reproduction;regulation of biological process;multi-organism process;establishment of localization;positive regulation of biological process;developmental process;multicellular organismal process;cellular process;response to stimulus;signaling;negative regulation of biological process;localization;biological regulation;metabolic process	extracellular region part;extracellular region;organelle;cell part;cell;organelle part;membrane-enclosed lumen	transporter activity;binding;catalytic activity			GO:0051338,regulation of transferase activity;GO:0051348,negative regulation of transferase activity;GO:0034960,cellular biopolymer metabolic process;GO:0031347,regulation of defense response;GO:0035303,regulation of dephosphorylation;GO:0042221,response to chemical stimulus;GO:0048731,system development;GO:0051239,regulation of multicellular organismal process;GO:0043283,biopolymer metabolic pro…	GO:0044446,intracellular organelle part;GO:0005765,lysosomal membrane;GO:0031982,vesicle;GO:0005764,lysosome;GO:0044422,organelle part;GO:0043233,organelle lumen;GO:0070062,extracellular vesicular exosome;GO:0005789,endoplasmic reticulum membrane;GO:0044464,cell part;GO:0043231,intracellular membrane-bounded organelle;GO:0043202,lysosomal lumen;GO:0031974,membrane-enclosed lumen;GO:0005623,cell;G…	GO:0016829,lyase activity;GO:0051183,vitamin transporter activity;GO:0005515,protein binding;GO:0016798,hydrolase activity, acting on glycosyl bonds;GO:0003824,catalytic activity;GO:0005488,binding;GO:0008092,cytoskeletal protein binding;GO:0004553,hydrolase activity, hydrolyzing O-glycosyl compounds;GO:0005215,transporter activity;GO:0005102,receptor binding;GO:0016787,hydrolase activity;GO:0003…
31	sp|A0A0B4J1U7|HV601_HUMAN	Immunoglobulin heavy variable 6-1 OS=Homo sapiens GN=IGHV6-1 PE=3 SV=1	down	0.3576	0.0129675					Fc epsilon RI signaling pathway;Viral myocarditis;Primary immunodeficiency;Staphylococcus aureus infection;Natural killer cell mediated cytotoxicity;Hematopoietic cell lineage;Asthma;Leishmaniasis;Phagosome;Systemic lupus erythematosus;Fc gamma R-mediated phagocytosis;Allograft rejection;B cell receptor signaling pathway;Dilated cardiomyopathy;Autoimmune thyroid disease;Intestinal immune network …
32	sp|P48740|MASP1_HUMAN	Mannan-binding lectin serine protease 1 OS=Homo sapiens GN=MASP1 PE=1 SV=3	down	0.347775	0.00407394	immune system process;regulation of biological process;establishment of localization;cellular component organization or biogenesis;positive regulation of biological process;cellular process;response to stimulus;negative regulation of biological process;localization;biological regulation;metabolic process	extracellular region part;extracellular region	binding;catalytic activity	Posttranslational modification, protein turnover, chaperones ;	Complement and coagulation cascades;Staphylococcus aureus infection	GO:0009894,regulation of catabolic process;GO:0002673,regulation of acute inflammatory response;GO:0065007,biological regulation;GO:0002698,negative regulation of immune effector process;GO:0009605,response to external stimulus;GO:0031347,regulation of defense response;GO:0006950,response to stress;GO:0048584,positive regulation of response to stimulus;GO:0002252,immune effector process;GO:003132…	GO:0005615,extracellular space;GO:0005576,extracellular region;GO:0044421,extracellular region part	GO:0043169,cation binding;GO:0042803,protein homodimerization activity;GO:0017171,serine hydrolase activity;GO:0005515,protein binding;GO:0003824,catalytic activity;GO:0043167,ion binding;GO:0008236,serine-type peptidase activity;GO:0046872,metal ion binding;GO:0008233,peptidase activity;GO:0042802,identical protein binding;GO:0070011,peptidase activity, acting on L-amino acid peptides;GO:0046983…
[truncated: 111 more rows]

## Sheet: 116vs113
N	Accession	Name	Diff_state	116:113	PVal 116:113	GO_function(Biological_Process)	GO_function(Cellular_Component)	GO_function(Molecular_Function)	COG_function	Kegg_function	GO_enrichment(Biological_Process)	GO_enrichment(Cellular_Component)	GO_enrichment(Molecular_Function)	Kegg_enrichment
[truncated: 115 more rows]

## Sheet: 116vs114
N	Accession	Name	Diff_state	116:114	PVal 116:114	GO_function(Biological_Process)	GO_function(Cellular_Component)	GO_function(Molecular_Function)	COG_function	Kegg_function	GO_enrichment(Biological_Process)	GO_enrichment(Cellular_Component)	GO_enrichment(Molecular_Function)	Kegg_enrichment
[truncated: 86 more rows]

## Sheet: 116vs115
N	Accession	Name	Diff_state	116:115	PVal 116:115	GO_function(Biological_Process)	GO_function(Cellular_Component)	GO_function(Molecular_Function)	COG_function	Kegg_function	GO_enrichment(Biological_Process)	GO_enrichment(Cellular_Component)	GO_enrichment(Molecular_Function)	Kegg_enrichment
[truncated: 158 more rows]
