# Supplementary material for: iTRAQ-Based Proteomics Analysis of Plasma of Myasthenia Gravis Patients Treated with Jia Wei Bu Zhong Yi Qi Decoction
Source: Evid Based Complement Alternat Med. 2019 Dec 13;2019:9147072. doi: 10.1155/2019/9147072 (PMC6930785; doi:10.1155/2019/9147072)
Supplement: Supplementary Materials — All upregulated (ratio ≥ 1.5) and downregulated proteins (ratio ≤0.67) in the groups of T1 vs. C, T2 vs. C, T2 vs. T1, T3 vs. C, T3 vs. T1, T3 vs. T2 are presented in Additional file 1; immune pathway-related proteins and the top 10 upregulated or downregulated proteins in each group were picked out and are presented in Excel S1. The 15 core protein in the protein interaction network (Figure 3) and matching statistical analysis of fold changes in T1 vs. C, T2 vs. C, T2 vs. T1, T3 vs. C, T3 vs. T1, and T3 vs. T2 groups are presented in Excel S2. Protein interaction in Excel S1 was analyzed by STRING database and interacted proteins with combined score >0.4 are presented in Excel S3. Heat map visualization of the differentially expressed proteins in plasma samples of myasthenia gravis (MG) patients (T1) compared with those of the healthy control group (C) is shown in Supplementary Figure 1A. Heat map visualization of the differentially expressed proteins in plasma samples of MG patients with the combined treatment of routine western medicine and BZYQ decoction (T3) compared with those of patients with routine treatment (T2) is shown in Supplementary Figure 1B. [file 9147072.f1.zip › 9147072.f1/Excel S1.xlsx]

## Sheet: Sheet1
C-reactive protein GN=CRP
Alpha-2-HS-glycoprotein GN=AHSG
Serotransferrin GN=TF
Apolipoprotein C-III GN=APOC3
Apolipoprotein A-II GN=APOA2
von Willebrand factor GN=VWF
Alpha-actinin-1 GN=ACTN1
Inter-alpha-trypsin inhibitor heavy chain H4 GN=ITIH4
Inter-alpha-trypsin inhibitor heavy chain H3 GN=ITIH3
Thrombospondin-1 GN=THBS1
Histidine-rich glycoprotein GN=HRG
Platelet basic protein GN=PPBP
Insulin-like growth factor-binding protein 1 GN=IGFBP1
Ceruloplasmin GN=CP
Adiponectin GN=ADIPOQ
Talin-1 GN=TLN1
Myosin-9 GN=MYH9
Tubulin alpha-4A chain GN=TUBA4A
Serum paraoxonase/arylesterase 1 GN=PON1
Inter-alpha-trypsin inhibitor heavy chain H2 GN=ITIH2
Complement component C9 GN=C9
Tubulin beta chain GN=TUBB
Tubulin alpha-1A chain GN=TUBA1A
Tropomyosin alpha-4 chain GN=TPM4
Stromelysin-1 GN=MMP3
Sex hormone-binding globulin GN=SHBG
Myosin light polypeptide 6 GN=MYL6
Inter-alpha-trypsin inhibitor heavy chain H1 GN=ITIH1
Insulin-like growth factor-binding protein 3 GN=IGFBP3
Filamin-A GN=FLNA
Fetuin-B GN=FETUB
Apolipoprotein A-V GN=APOA5
Apolipoprotein A-IV GN=APOA4
Vitamin K-dependent protein C GN=PROC
Integrin-linked protein kinase GN=ILK
Heat shock protein beta-1 GN=HSPB1
Complement C4-A GN=C4A
Complement C1q subcomponent subunit C GN=C1QC
Serum amyloid A-1 protein GN=SAA1
Plasma serine protease inhibitor GN=SERPINA5
Phospholipid transfer protein GN=PLTP
Lumican GN=LUM
Histone H4 GN=HIST1H4A
Complement component C8 alpha chain GN=C8A
Complement C1r subcomponent GN=C1R
Ras suppressor protein 1 GN=RSU1
Monocyte differentiation antigen CD14 GN=CD14
Lipopolysaccharide-binding protein GN=LBP
Insulin-like growth factor-binding protein 2 GN=IGFBP2
Thrombospondin-4 GN=THBS4
Platelet factor 4 GN=PF4
Phosphatidylinositol-glycan-specific phospholipase D GN=GPLD1
Neutrophil defensin 3 GN=DEFA3
Keratin, type I cytoskeletal 16 GN=KRT16
Immunoglobulin kappa variable 3-20 GN=IGKV3-20
Immunoglobulin heavy variable 6-1 GN=IGHV6-1 1
Immunoglobulin heavy variable 3-49 GN=IGHV3-49
Immunoglobulin heavy variable 2-26 GN=IGHV2-26 1
Ig kappa chain C region GN=IGKC
Ig gamma-1 chain C region GN=IGHG1
Histone H3.1t GN=HIST3H3
Heat shock protein HSP 90-alpha GN=HSP90AA1
Fibulin-1 GN=FBLN1
FERM and PDZ domain-containing protein 1 GN=FRMPD1
Endoplasmin GN=HSP90B1
EGF-containing fibulin-like extracellular matrix protein 1 GN=EFEMP1
Complement factor H-related protein 1 GN=CFHR1
Cholesteryl ester transfer protein GN=CETP
Apolipoprotein D GN=APOD
