# Supplementary material for: iTRAQ-Based Proteomics Analysis of Plasma of Myasthenia Gravis Patients Treated with Jia Wei Bu Zhong Yi Qi Decoction
Source: Evid Based Complement Alternat Med. 2019 Dec 13;2019:9147072. doi: 10.1155/2019/9147072 (PMC6930785; doi:10.1155/2019/9147072)
Supplement: Supplementary Materials — All upregulated (ratio ≥ 1.5) and downregulated proteins (ratio ≤0.67) in the groups of T1 vs. C, T2 vs. C, T2 vs. T1, T3 vs. C, T3 vs. T1, T3 vs. T2 are presented in Additional file 1; immune pathway-related proteins and the top 10 upregulated or downregulated proteins in each group were picked out and are presented in Excel S1. The 15 core protein in the protein interaction network (Figure 3) and matching statistical analysis of fold changes in T1 vs. C, T2 vs. C, T2 vs. T1, T3 vs. C, T3 vs. T1, and T3 vs. T2 groups are presented in Excel S2. Protein interaction in Excel S1 was analyzed by STRING database and interacted proteins with combined score >0.4 are presented in Excel S3. Heat map visualization of the differentially expressed proteins in plasma samples of myasthenia gravis (MG) patients (T1) compared with those of the healthy control group (C) is shown in Supplementary Figure 1A. Heat map visualization of the differentially expressed proteins in plasma samples of MG patients with the combined treatment of routine western medicine and BZYQ decoction (T3) compared with those of patients with routine treatment (T2) is shown in Supplementary Figure 1B. [file 9147072.f1.zip › 9147072.f1/Excel S2.xlsx]

## Sheet: Sheet1
Accession	Name	114:113 ratio	115:113 ratio	115:114 ratio	116:113 ratio	116:114 ratio	116:115 ratio	GO_function(Biological_Process)	GO_function(Cellular_Component)	GO_function(Molecular_Function)	COG_function	Kegg_function	GO_enrichment(Biological_Process)	GO_enrichment(Cellular_Component)	GO_enrichment(Molecular_Function)	Kegg_enrichment
sp|P02741|CRP_HUMAN	C-reactive protein OS=Homo sapiens GN=CRP PE=1 SV=1	0.0477297		9.53923		27.7656	2.89891	immune system process;regulation of biological process;multi-organism process;establishment of localization;cellular component organization or biogenesis;positive regulation of biological process;developmental process;multicellular organismal process;cellular process;cell proliferation;response to stimulus;negative regulation of biological process;localization;biological regulation;metabolic proc…	extracellular region part;extracellular region;organelle;cell part;cell	binding		Pancreatic secretion;Proximal tubule bicarbonate reclamation;Gastric acid secretion;Collecting duct acid secretion;Nitrogen metabolism	GO:0065007,biological regulation;GO:0050793,regulation of developmental process;GO:0010628,positive regulation of gene expression;GO:0009617,response to bacterium;GO:0009605,response to external stimulus;GO:0048534,hemopoietic or lymphoid organ development;GO:0006950,response to stress;GO:0048731,system development;GO:0048584,positive regulation of response to stimulus;GO:0009607,response to biot…	GO:0044444,cytoplasmic part;GO:0005938,cell cortex;GO:0031982,vesicle;GO:0042995,cell projection;GO:0043005,neuron projection;GO:0070062,extracellular vesicular exosome;GO:0044464,cell part;GO:0043230,extracellular organelle;GO:0043227,membrane-bounded organelle;GO:0044421,extracellular region part;GO:0005615,extracellular space;GO:0044424,intracellular part;GO:0005737,cytoplasm;GO:0005623,cell;G…	GO:0043169,cation binding;GO:0008034,lipoprotein binding;GO:0042803,protein homodimerization activity;GO:0008289,lipid binding;GO:0005515,protein binding;GO:0046914,transition metal ion binding;GO:0050997,quaternary ammonium group binding;GO:0043167,ion binding;GO:0043178,alcohol binding;GO:0001848,complement binding;GO:0070325,lipoprotein receptor binding;GO:0043176,amine binding;GO:0030169,low-…
sp|P02765|FETUA_HUMAN	Alpha-2-HS-glycoprotein OS=Homo sapiens GN=AHSG PE=1 SV=1	1.82155	0.133877	0.0734041	1.72649		13.1573	regulation of biological process;establishment of localization;cellular component organization or biogenesis;positive regulation of biological process;developmental process;multicellular organismal process;cellular process;response to stimulus;signaling;negative regulation of biological process;localization;biological regulation;metabolic process	extracellular region part;extracellular region;organelle;cell part;cell	enzyme regulator activity;binding			GO:0065007,biological regulation;GO:0050793,regulation of developmental process;GO:0009605,response to external stimulus;GO:0031347,regulation of defense response;GO:0006950,response to stress;GO:0048731,system development;GO:0070168,negative regulation of biomineral formation;GO:0052548,regulation of endopeptidase activity;GO:0031324,negative regulation of cellular metabolic process;GO:0051239,r…	GO:0005623,cell;GO:0031982,vesicle;GO:0043226,organelle;GO:0031012,extracellular matrix;GO:0005886,plasma membrane;GO:0005576,extracellular region;GO:0070062,extracellular vesicular exosome;GO:0044464,cell part;GO:0043230,extracellular organelle;GO:0065010,extracellular membrane-bounded organelle;GO:0031988,membrane-bounded vesicle;GO:0043227,membrane-bounded organelle;GO:0016020,membrane;GO:0044…	GO:0019207,kinase regulator activity;GO:0005515,protein binding;GO:0004869,cysteine-type endopeptidase inhibitor activity;GO:0019210,kinase inhibitor activity;GO:0030234,enzyme regulator activity;GO:0030414,peptidase inhibitor activity;GO:0004866,endopeptidase inhibitor activity;GO:0004857,enzyme inhibitor activity;GO:0005488,binding
sp|P02787|TRFE_HUMAN	Serotransferrin OS=Homo sapiens GN=TF PE=1 SV=3	0.328605		3.22813		4.28504		immune system process;regulation of biological process;establishment of localization;cellular component organization or biogenesis;positive regulation of biological process;developmental process;multicellular organismal process;cellular process;cell proliferation;response to stimulus;signaling;localization;locomotion;metabolic process;biological regulation;death	extracellular region part;organelle;cell part;membrane-enclosed lumen;extracellular region;cell;macromolecular complex;organelle part	transporter activity;binding			GO:0051338,regulation of transferase activity;GO:0000187,activation of MAPK activity;GO:0050801,ion homeostasis;GO:0034960,cellular biopolymer metabolic process;GO:0010628,positive regulation of gene expression;GO:0045893,positive regulation of transcription, DNA-dependent;GO:0042221,response to chemical stimulus;GO:0048731,system development;GO:0002576,platelet degranulation;GO:0031326,regulatio…	GO:0044446,intracellular organelle part;GO:0031982,vesicle;GO:0044422,organelle part;GO:0043233,organelle lumen;GO:0070062,extracellular vesicular exosome;GO:0044464,cell part;GO:0005905,coated pit;GO:0044420,extracellular matrix part;GO:0031232,extrinsic to external side of plasma membrane;GO:0005769,early endosome;GO:0043231,intracellular membrane-bounded organelle;GO:0031974,membrane-enclosed …	GO:0032553,ribonucleotide binding;GO:0008324,cation transmembrane transporter activity;GO:0043169,cation binding;GO:0046872,metal ion binding;GO:0032555,purine ribonucleotide binding;GO:0000166,nucleotide binding;GO:0015075,ion transmembrane transporter activity;GO:0046873,metal ion transmembrane transporter activity;GO:0005506,iron ion binding;GO:0005488,binding;GO:0046914,transition metal ion b…
sp|P02656|APOC3_HUMAN	Apolipoprotein C-III OS=Homo sapiens GN=APOC3 PE=1 SV=1	0.195839				3.71635	0.455441	regulation of biological process;establishment of localization;cellular component organization or biogenesis;positive regulation of biological process;multicellular organismal process;cellular process;response to stimulus;signaling;negative regulation of biological process;localization;biological regulation;metabolic process	extracellular region part;extracellular region;organelle;macromolecular complex;cell part;cell	enzyme regulator activity;binding		PPAR signaling pathway	GO:0009894,regulation of catabolic process;GO:0006641,triglyceride metabolic process;GO:0042221,response to chemical stimulus;GO:0034014,response to triglyceride;GO:0009416,response to light stimulus;GO:0031326,regulation of cellular biosynthetic process;GO:0009892,negative regulation of metabolic process;GO:0051056,regulation of small GTPase mediated signal transduction;GO:0043086,negative regul…	GO:0043229,intracellular organelle;GO:0044444,cytoplasmic part;GO:0034366,spherical high-density lipoprotein particle;GO:0005768,endosome;GO:0032994,protein-lipid complex;GO:0034361,very-low-density lipoprotein particle;GO:0031982,vesicle;GO:0070062,extracellular vesicular exosome;GO:0044464,cell part;GO:0043230,extracellular organelle;GO:0043227,membrane-bounded organelle;GO:0034385,triglyceride…	GO:0032934,sterol binding;GO:0008289,lipid binding;GO:0070653,high-density lipoprotein receptor binding;GO:0015485,cholesterol binding;GO:0005515,protein binding;GO:0005488,binding;GO:0005543,phospholipid binding;GO:0070325,lipoprotein receptor binding;GO:0005496,steroid binding;GO:0055102,lipase inhibitor activity;GO:0005102,receptor binding;GO:0030234,enzyme regulator activity;GO:0004857,enzyme…
sp|P02652|APOA2_HUMAN	Apolipoprotein A-II OS=Homo sapiens GN=APOA2 PE=1 SV=1	4.28101		0.120389		0.216355	1.83005	multi-organism process;positive regulation of biological process;developmental process;multicellular organismal process;cellular process;signaling;viral reproduction;negative regulation of biological process;biological regulation;metabolic process;immune system process;regulation of biological process;cellular component organization or biogenesis;establishment of localization;response to stimulus…	extracellular region part;organelle;cell part;membrane-enclosed lumen;extracellular region;cell;macromolecular complex;organelle part	enzyme regulator activity;transporter activity;binding		PPAR signaling pathway	GO:0009894,regulation of catabolic process;GO:0034960,cellular biopolymer metabolic process;GO:0006641,triglyceride metabolic process;GO:0060341,regulation of cellular localization;GO:0042221,response to chemical stimulus;GO:0048731,system development;GO:0009416,response to light stimulus;GO:0031326,regulation of cellular biosynthetic process;GO:0051046,regulation of secretion;GO:0051239,regulati…	GO:0044446,intracellular organelle part;GO:0034366,spherical high-density lipoprotein particle;GO:0032994,protein-lipid complex;GO:0031982,vesicle;GO:0044422,organelle part;GO:0043233,organelle lumen;GO:0070062,extracellular vesicular exosome;GO:0044464,cell part;GO:0005769,early endosome;GO:0043231,intracellular membrane-bounded organelle;GO:0031974,membrane-enclosed lumen;GO:0005623,cell;GO:003…	GO:0043169,cation binding;GO:0031210,phosphatidylcholine binding;GO:0008034,lipoprotein binding;GO:0042803,protein homodimerization activity;GO:0008289,lipid binding;GO:0005515,protein binding;GO:0050997,quaternary ammonium group binding;GO:0060228,phosphatidylcholine-sterol O-acyltransferase activator activity;GO:0043167,ion binding;GO:0043178,alcohol binding;GO:0005543,phospholipid binding;GO:0…
sp|P04275|VWF_HUMAN	von Willebrand factor OS=Homo sapiens GN=VWF PE=1 SV=4	0.263957	1.62853	6.18994	0.664999	2.52819	0.407556	response to stimulus;biological adhesion;cellular component organization or biogenesis;developmental process;biological regulation;multicellular organismal process;cellular process	extracellular region part;extracellular region;organelle;cell part;cell	binding		Complement and coagulation cascades;ECM-receptor interaction;Focal adhesion	GO:0065007,biological regulation;GO:0051260,protein homooligomerization;GO:0009605,response to external stimulus;GO:0070271,protein complex biogenesis;GO:0006950,response to stress;GO:0001890,placenta development;GO:0048731,system development;GO:0043933,macromolecular complex subunit organization;GO:0051259,protein oligomerization;GO:0009611,response to wounding;GO:0007596,blood coagulation;GO:00…	GO:0043229,intracellular organelle;GO:0044444,cytoplasmic part;GO:0005783,endoplasmic reticulum;GO:0030136,clathrin-coated vesicle;GO:0031982,vesicle;GO:0070062,extracellular vesicular exosome;GO:0044464,cell part;GO:0030135,coated vesicle;GO:0043230,extracellular organelle;GO:0043227,membrane-bounded organelle;GO:0044421,extracellular region part;GO:0043231,intracellular membrane-bounded organel…	GO:0042803,protein homodimerization activity;GO:0005178,integrin binding;GO:0032403,protein complex binding;GO:0001948,glycoprotein binding;GO:0042802,identical protein binding;GO:0005515,protein binding;GO:0005488,binding;GO:0046983,protein dimerization activity;GO:0019899,enzyme binding;GO:0002020,protease binding;GO:0051087,chaperone binding;GO:0005518,collagen binding;GO:0005102,receptor bind…
sp|P12814|ACTN1_HUMAN	Alpha-actinin-1 OS=Homo sapiens GN=ACTN1 PE=1 SV=2		2.21018	2.69949	0.267021	0.328211	0.11909	immune system process;regulation of biological process;establishment of localization;cellular component organization or biogenesis;developmental process;multicellular organismal process;cellular process;response to stimulus;biological adhesion;signaling;negative regulation of biological process;localization;metabolic process;biological regulation;death	extracellular region part;organelle;cell part;membrane-enclosed lumen;extracellular region;cell;macromolecular complex;organelle part	protein binding transcription factor activity;binding	Signal transduction mechanisms ; Cytoskeleton ; Cell cycle control, cell division, chromosome partitioning ; General function prediction only ;Cytoskeleton ;	Adherens junction;Regulation of actin cytoskeleton;Arrhythmogenic right ventricular cardiomyopathy (ARVC);Tight junction;Focal adhesion;Systemic lupus erythematosus;Leukocyte transendothelial migration;Amoebiasis	GO:0065007,biological regulation;GO:0007160,cell-matrix adhesion;GO:0007517,muscle organ development;GO:0048747,muscle fiber development;GO:0050793,regulation of developmental process;GO:0009605,response to external stimulus;GO:0048534,hemopoietic or lymphoid organ development;GO:0006950,response to stress;GO:0060341,regulation of cellular localization;GO:0048731,system development;GO:0002576,pla…	GO:0044446,intracellular organelle part;GO:0001725,stress fiber;GO:0031982,vesicle;GO:0044464,cell part;GO:0005911,cell-cell junction;GO:0043232,intracellular non-membrane-bounded organelle;GO:0043231,intracellular membrane-bounded organelle;GO:0030055,cell-substrate junction;GO:0030141,secretory granule;GO:0005912,adherens junction;GO:0012505,endomembrane system;GO:0030659,cytoplasmic vesicle me…	GO:0043169,cation binding;GO:0042803,protein homodimerization activity;GO:0005178,integrin binding;GO:0032403,protein complex binding;GO:0005515,protein binding;GO:0017166,vinculin binding;GO:0019904,protein domain specific binding;GO:0043167,ion binding;GO:0051015,actin filament binding;GO:0003676,nucleic acid binding;GO:0046872,metal ion binding;GO:0042802,identical protein binding;GO:0003723,R…
sp|Q14624|ITIH4_HUMAN	Inter-alpha-trypsin inhibitor heavy chain H4 OS=Homo sapiens GN=ITIH4 PE=1 SV=4	4.04292		0.35492		0.267281		response to stimulus;regulation of biological process;metabolic process;biological regulation	extracellular region part;extracellular region;organelle;cell part;cell	enzyme regulator activity;binding	General function prediction only ;	Arrhythmogenic right ventricular cardiomyopathy (ARVC);MAPK signaling pathway;Dilated cardiomyopathy;Hypertrophic cardiomyopathy (HCM);Cardiac muscle contraction	GO:0065007,biological regulation;GO:0009605,response to external stimulus;GO:0034097,response to cytokine stimulus;GO:0006950,response to stress;GO:0042221,response to chemical stimulus;GO:0044238,primary metabolic process;GO:0052548,regulation of endopeptidase activity;GO:0030203,glycosaminoglycan metabolic process;GO:0043283,biopolymer metabolic process;GO:0065009,regulation of molecular functi…	GO:0044424,intracellular part;GO:0005737,cytoplasm;GO:0005623,cell;GO:0031982,vesicle;GO:0043226,organelle;GO:0005622,intracellular;GO:0005886,plasma membrane;GO:0005576,extracellular region;GO:0070062,extracellular vesicular exosome;GO:0044464,cell part;GO:0043230,extracellular organelle;GO:0065010,extracellular membrane-bounded organelle;GO:0031988,membrane-bounded vesicle;GO:0043227,membrane-b…	GO:0004867,serine-type endopeptidase inhibitor activity;GO:0005515,protein binding;GO:0030234,enzyme regulator activity;GO:0030414,peptidase inhibitor activity;GO:0004866,endopeptidase inhibitor activity;GO:0004857,enzyme inhibitor activity;GO:0005488,binding
sp|Q06033|ITIH3_HUMAN	Inter-alpha-trypsin inhibitor heavy chain H3 OS=Homo sapiens GN=ITIH3 PE=1 SV=2			0.600078	1.62312		1.94841	regulation of biological process;metabolic process;biological regulation	extracellular region part;extracellular region;organelle	enzyme regulator activity	General function prediction only ;	MAPK signaling pathway	GO:0065007,biological regulation;GO:0050790,regulation of catalytic activity;GO:0010466,negative regulation of peptidase activity;GO:0044238,primary metabolic process;GO:0052548,regulation of endopeptidase activity;GO:0030203,glycosaminoglycan metabolic process;GO:0043283,biopolymer metabolic process;GO:0006807,nitrogen compound metabolic process;GO:0065009,regulation of molecular function;GO:004…	GO:0031982,vesicle;GO:0043226,organelle;GO:0005576,extracellular region;GO:0070062,extracellular vesicular exosome;GO:0043230,extracellular organelle;GO:0065010,extracellular membrane-bounded organelle;GO:0031988,membrane-bounded vesicle;GO:0043227,membrane-bounded organelle;GO:0044421,extracellular region part	GO:0004867,serine-type endopeptidase inhibitor activity;GO:0030234,enzyme regulator activity;GO:0030414,peptidase inhibitor activity;GO:0004866,endopeptidase inhibitor activity;GO:0004857,enzyme inhibitor activity
sp|P07996|TSP1_HUMAN	Thrombospondin-1 OS=Homo sapiens GN=THBS1 PE=1 SV=2	2.18951	3.69614	1.68787	0.172453	0.0776213	0.0459304	positive regulation of biological process;developmental process;multicellular organismal process;cellular process;growth;signaling;negative regulation of biological process;metabolic process;biological regulation;death;immune system process;regulation of biological process;cellular component organization or biogenesis;establishment of localization;cell proliferation;response to stimulus;biologica…	extracellular region part;organelle;cell part;membrane-enclosed lumen;extracellular region;cell;macromolecular complex;organelle part	binding		Phagosome;ECM-receptor interaction;p53 signaling pathway;Focal adhesion;Malaria;Bladder cancer;TGF-beta signaling pathway	GO:0051338,regulation of transferase activity;GO:0000187,activation of MAPK activity;GO:0010740,positive regulation of protein kinase cascade;GO:0034960,cellular biopolymer metabolic process;GO:0042221,response to chemical stimulus;GO:0048731,system development;GO:0002576,platelet degranulation;GO:0002694,regulation of leukocyte activation;GO:0018149,peptide cross-linking;GO:0043537,negative regu…	GO:0044446,intracellular organelle part;GO:0031982,vesicle;GO:0044422,organelle part;GO:0043233,organelle lumen;GO:0070062,extracellular vesicular exosome;GO:0044464,cell part;GO:0016528,sarcoplasm;GO:0043231,intracellular membrane-bounded organelle;GO:0031974,membrane-enclosed lumen;GO:0005623,cell;GO:0030141,secretory granule;GO:0044425,membrane part;GO:0005576,extracellular region;GO:0009897,e…	GO:0043169,cation binding;GO:0008034,lipoprotein binding;GO:0005178,integrin binding;GO:0001968,fibronectin binding;GO:0032403,protein complex binding;GO:0008289,lipid binding;GO:0005515,protein binding;GO:0050840,extracellular matrix binding;GO:0030247,polysaccharide binding;GO:0043167,ion binding;GO:0005543,phospholipid binding;GO:0043236,laminin binding;GO:0019838,growth factor binding;GO:0030…
sp|P04196|HRG_HUMAN	Histidine-rich glycoprotein OS=Homo sapiens GN=HRG PE=1 SV=1	4.46162		0.5397	4.30973		1.89809	multi-organism process;positive regulation of biological process;developmental process;multicellular organismal process;cellular process;growth;signaling;negative regulation of biological process;metabolic process;biological regulation;death;immune system process;regulation of biological process;cellular component organization or biogenesis;establishment of localization;cell proliferation;respons…	extracellular region part;organelle;cell part;membrane-enclosed lumen;extracellular region;synapse;cell;organelle part	enzyme regulator activity;chemorepellent activity;protein binding transcription factor activity;binding		Wnt signaling pathway;RNA transport	GO:0009894,regulation of catabolic process;GO:0016477,cell migration;GO:0007267,cell-cell signaling;GO:0010558,negative regulation of macromolecule biosynthetic process;GO:0002576,platelet degranulation;GO:0031326,regulation of cellular biosynthetic process;GO:0052548,regulation of endopeptidase activity;GO:0001952,regulation of cell-matrix adhesion;GO:0009892,negative regulation of metabolic pro…	GO:0044446,intracellular organelle part;GO:0031982,vesicle;GO:0044422,organelle part;GO:0043233,organelle lumen;GO:0070062,extracellular vesicular exosome;GO:0044464,cell part;GO:0044463,cell projection part;GO:0043231,intracellular membrane-bounded organelle;GO:0033267,axon part;GO:0031974,membrane-enclosed lumen;GO:0005634,nucleus;GO:0005623,cell;GO:0030141,secretory granule;GO:0044425,membrane…	GO:0043169,cation binding;GO:0046906,tetrapyrrole binding;GO:0032403,protein complex binding;GO:0005515,protein binding;GO:0005506,iron ion binding;GO:0030247,polysaccharide binding;GO:0046914,transition metal ion binding;GO:0043167,ion binding;GO:0004867,serine-type endopeptidase inhibitor activity;GO:0020037,heme binding;GO:0008047,enzyme activator activity;GO:0030234,enzyme regulator activity;…
sp|P02775|CXCL7_HUMAN	Platelet basic protein OS=Homo sapiens GN=PPBP PE=1 SV=3		3.07498	2.10552	0.170382	0.118965	0.0565963	immune system process;regulation of biological process;multi-organism process;establishment of localization;positive regulation of biological process;multicellular organismal process;cellular process;cell killing;cell proliferation;response to stimulus;signaling;localization;locomotion;biological regulation	extracellular region part;extracellular region;organelle;cell part;cell;organelle part;membrane-enclosed lumen	transporter activity;binding		Chemokine signaling pathway;Cytokine-cytokine receptor interaction	GO:0065007,biological regulation;GO:0016477,cell migration;GO:0048870,cell motility;GO:0009617,response to bacterium;GO:0009605,response to external stimulus;GO:0060326,cell chemotaxis;GO:0002237,response to molecule of bacterial origin;GO:0006950,response to stress;GO:0042221,response to chemical stimulus;GO:0045321,leukocyte activation;GO:0002576,platelet degranulation;GO:0048584,positive regul…	GO:0043229,intracellular organelle;GO:0044446,intracellular organelle part;GO:0044444,cytoplasmic part;GO:0031091,platelet alpha granule;GO:0031982,vesicle;GO:0044422,organelle part;GO:0043233,organelle lumen;GO:0044433,cytoplasmic vesicle part;GO:0044464,cell part;GO:0060205,cytoplasmic membrane-bounded vesicle lumen;GO:0043227,membrane-bounded organelle;GO:0044421,extracellular region part;GO:0…	GO:0005515,protein binding;GO:0008083,growth factor activity;GO:0001664,G-protein-coupled receptor binding;GO:0005125,cytokine activity;GO:0005488,binding;GO:0008009,chemokine activity;GO:0045236,CXCR chemokine receptor binding;GO:0005215,transporter activity;GO:0022892,substrate-specific transporter activity;GO:0022857,transmembrane transporter activity;GO:0005102,receptor binding;GO:0042379,che…
sp|P08833|IBP1_HUMAN	Insulin-like growth factor-binding protein 1 OS=Homo sapiens GN=IGFBP1 PE=1 SV=1		0.244928	0.136153		0.613658	4.68364	regulation of biological process;cellular component organization or biogenesis;positive regulation of biological process;developmental process;cellular process;response to stimulus;growth;signaling;negative regulation of biological process;biological regulation;metabolic process	extracellular region part;extracellular region;cell part;cell	binding		p53 signaling pathway	GO:0065007,biological regulation;GO:0034960,cellular biopolymer metabolic process;GO:0009605,response to external stimulus;GO:0007167,enzyme linked receptor protein signaling pathway;GO:0019318,hexose metabolic process;GO:0006950,response to stress;GO:0042221,response to chemical stimulus;GO:0048731,system development;GO:0042246,tissue regeneration;GO:0009719,response to endogenous stimulus;GO:00…	GO:0005615,extracellular space;GO:0005576,extracellular region;GO:0044464,cell part;GO:0005623,cell;GO:0005622,intracellular;GO:0044421,extracellular region part	GO:0031995,insulin-like growth factor II binding;GO:0005515,protein binding;GO:0031994,insulin-like growth factor I binding;GO:0005520,insulin-like growth factor binding;GO:0005102,receptor binding;GO:0005488,binding;GO:0019838,growth factor binding
sp|P00450|CERU_HUMAN	Ceruloplasmin OS=Homo sapiens GN=CP PE=1 SV=1	2.40732	0.132474	0.0551022		0.307429	5.58912	response to stimulus;establishment of localization;developmental process;localization;metabolic process;biological regulation;multicellular organismal process;cellular process	extracellular region part;extracellular region;organelle;cell part;cell;organelle part	binding;catalytic activity	Secondary metabolites biosynthesis, transport and catabolism ;	Porphyrin and chlorophyll metabolism	GO:0065007,biological regulation;GO:0031667,response to nutrient levels;GO:0050801,ion homeostasis;GO:0009605,response to external stimulus;GO:0042221,response to chemical stimulus;GO:0048731,system development;GO:0019725,cellular homeostasis;GO:0042592,homeostatic process;GO:0030003,cellular cation homeostasis;GO:0010035,response to inorganic substance;GO:0030323,respiratory tube development;GO:…	GO:0044446,intracellular organelle part;GO:0005765,lysosomal membrane;GO:0031982,vesicle;GO:0005764,lysosome;GO:0044422,organelle part;GO:0070062,extracellular vesicular exosome;GO:0044464,cell part;GO:0043231,intracellular membrane-bounded organelle;GO:0005623,cell;GO:0044425,membrane part;GO:0005576,extracellular region;GO:0065010,extracellular membrane-bounded organelle;GO:0044437,vacuolar par…	GO:0043169,cation binding;GO:0046872,metal ion binding;GO:0005515,protein binding;GO:0005507,copper ion binding;GO:0003824,catalytic activity;GO:0005488,binding;GO:0046914,transition metal ion binding;GO:0043167,ion binding;GO:0016491,oxidoreductase activity;GO:0051087,chaperone binding
sp|Q15848|ADIPO_HUMAN	Adiponectin OS=Homo sapiens GN=ADIPOQ PE=1 SV=1	5.25336	10.9766	2.07098	8.13079			positive regulation of biological process;developmental process;multicellular organismal process;cellular process;signaling;negative regulation of biological process;metabolic process;biological regulation;death;immune system process;regulation of biological process;cellular component organization or biogenesis;establishment of localization;rhythmic process;cell proliferation;biological adhesion;…	extracellular region part;extracellular region;organelle;cell part;cell	binding		Adipocytokine signaling pathway;PPAR signaling pathway;Type II diabetes mellitus	GO:0045995,regulation of embryonic development;GO:0031347,regulation of defense response;GO:0010558,negative regulation of macromolecule biosynthetic process;GO:0032370,positive regulation of lipid transport;GO:0031326,regulation of cellular biosynthetic process;GO:0019221,cytokine-mediated signaling pathway;GO:0009892,negative regulation of metabolic process;GO:0050731,positive regulation of pep…	GO:0043229,intracellular organelle;GO:0044444,cytoplasmic part;GO:0005783,endoplasmic reticulum;GO:0031982,vesicle;GO:0048471,perinuclear region of cytoplasm;GO:0070062,extracellular vesicular exosome;GO:0005581,collagen;GO:0044464,cell part;GO:0043230,extracellular organelle;GO:0044420,extracellular matrix part;GO:0043227,membrane-bounded organelle;GO:0044421,extracellular region part;GO:0043231…	GO:0048029,monosaccharide binding;GO:0042803,protein homodimerization activity;GO:0042802,identical protein binding;GO:0005515,protein binding;GO:0005529,sugar binding;GO:0005125,cytokine activity;GO:0005179,hormone activity;GO:0005488,binding;GO:0046983,protein dimerization activity;GO:0005102,receptor binding;GO:0030246,carbohydrate binding
