# Supplementary material for: iTRAQ-Based Proteomics Analysis of Plasma of Myasthenia Gravis Patients Treated with Jia Wei Bu Zhong Yi Qi Decoction
Source: Evid Based Complement Alternat Med. 2019 Dec 13;2019:9147072. doi: 10.1155/2019/9147072 (PMC6930785; doi:10.1155/2019/9147072)
Supplement: Supplementary Materials — All upregulated (ratio ≥ 1.5) and downregulated proteins (ratio ≤0.67) in the groups of T1 vs. C, T2 vs. C, T2 vs. T1, T3 vs. C, T3 vs. T1, T3 vs. T2 are presented in Additional file 1; immune pathway-related proteins and the top 10 upregulated or downregulated proteins in each group were picked out and are presented in Excel S1. The 15 core protein in the protein interaction network (Figure 3) and matching statistical analysis of fold changes in T1 vs. C, T2 vs. C, T2 vs. T1, T3 vs. C, T3 vs. T1, and T3 vs. T2 groups are presented in Excel S2. Protein interaction in Excel S1 was analyzed by STRING database and interacted proteins with combined score >0.4 are presented in Excel S3. Heat map visualization of the differentially expressed proteins in plasma samples of myasthenia gravis (MG) patients (T1) compared with those of the healthy control group (C) is shown in Supplementary Figure 1A. Heat map visualization of the differentially expressed proteins in plasma samples of MG patients with the combined treatment of routine western medicine and BZYQ decoction (T3) compared with those of patients with routine treatment (T2) is shown in Supplementary Figure 1B. [file 9147072.f1.zip › 9147072.f1/Excel S3.xlsx]

## Sheet: string_interactions
#node1	node2	node1_string_internal_id	node2_string_internal_id	node1_external_id	node2_external_id	neighborhood_on_chromosome	gene_fusion	phylogenetic_cooccurrence	homology	coexpression	experimentally_determined_interaction	database_annotated	automated_textmining	combined_score
TUBB	TUBA4A	1852162	1843912	9606.ENSP00000339001	9606.ENSP00000248437	0	0	0	0.92	0.739	0.924	0.9	0.83	0.997
TUBB	TUBA1A	1852162	1848244	9606.ENSP00000339001	9606.ENSP00000301071	0	0	0	0.92	0.739	0.924	0.9	0.752	0.997
APOA2	APOC3	1854701	1843124	9606.ENSP00000356969	9606.ENSP00000227667	0	0	0	0	0.737	0	0.9	0.822	0.994
MYL6	MYH9	1862334	1842558	9606.ENSP00000446714	9606.ENSP00000216181	0	0	0	0	0.055	0.889	0.9	0.333	0.992
APOC3	APOA5	1843124	1843123	9606.ENSP00000227667	9606.ENSP00000227665	0	0	0	0	0.319	0	0.9	0.823	0.986
CD14	LBP	1848617	1842663	9606.ENSP00000304236	9606.ENSP00000217407	0	0	0	0	0.054	0.36	0.9	0.727	0.981
AHSG	HRG	1859755	1843307	9606.ENSP00000393887	9606.ENSP00000232003	0	0	0	0	0.377	0	0.9	0.7	0.979
APOA4	APOC3	1853595	1843124	9606.ENSP00000350425	9606.ENSP00000227667	0	0	0	0	0.146	0	0.9	0.758	0.977
TUBA1A	TUBA4A	1848244	1843912	9606.ENSP00000301071	9606.ENSP00000248437	0	0	0	0.989	0	0.774	0.9	0.349	0.976
PF4	PPBP	1847665	1847664	9606.ENSP00000296029	9606.ENSP00000296028	0	0	0	0.901	0.752	0	0.9	0.924	0.976
THBS1	HRG	1844779	1843307	9606.ENSP00000260356	9606.ENSP00000232003	0	0	0	0	0	0.36	0.9	0.608	0.972
VWF	THBS1	1844904	1844779	9606.ENSP00000261405	9606.ENSP00000260356	0	0	0	0	0	0	0.9	0.72	0.97
C1QC	C1R	1856155	1847243	9606.ENSP00000363768	9606.ENSP00000290575	0	0	0	0	0.124	0	0.9	0.691	0.97
PF4	VWF	1847665	1844904	9606.ENSP00000296029	9606.ENSP00000261405	0	0	0	0	0.053	0	0.9	0.7	0.969
ITIH3	AHSG	1861173	1859755	9606.ENSP00000415769	9606.ENSP00000393887	0	0	0	0	0.656	0	0.9	0.077	0.965
ACTN1	TLN1	1858193	1849837	9606.ENSP00000377941	9606.ENSP00000316029	0	0	0	0	0.113	0.075	0.9	0.632	0.965
APOA2	APOA4	1854701	1853595	9606.ENSP00000356969	9606.ENSP00000350425	0	0	0	0	0	0	0.9	0.627	0.961
TUBB	HSP90AA1	1852162	1851814	9606.ENSP00000339001	9606.ENSP00000335153	0	0	0	0	0.061	0.132	0.9	0.567	0.96
SERPINA5	PROC	1851559	1843382	9606.ENSP00000333203	9606.ENSP00000234071	0.074	0	0	0	0.053	0.446	0.9	0.31	0.96
C8A	C9	1854122	1845353	9606.ENSP00000354458	9606.ENSP00000263408	0	0	0	0.8	0.375	0.36	0.9	0.305	0.958
ADIPOQ	CRP	1850277	1844348	9606.ENSP00000320709	9606.ENSP00000255030	0	0	0	0	0	0	0	0.956	0.956
PPBP	VWF	1847664	1844904	9606.ENSP00000296028	9606.ENSP00000261405	0	0	0	0	0.053	0	0.9	0.534	0.952
APOA2	APOA5	1854701	1843123	9606.ENSP00000356969	9606.ENSP00000227665	0	0	0	0	0.216	0	0.9	0.425	0.951
C4A	C1R	1859957	1847243	9606.ENSP00000396688	9606.ENSP00000290575	0	0	0	0	0.072	0	0.9	0.482	0.947
ITIH4	THBS1	1845847	1844779	9606.ENSP00000266041	9606.ENSP00000260356	0	0	0	0	0	0	0.9	0.489	0.946
PF4	THBS1	1847665	1844779	9606.ENSP00000296029	9606.ENSP00000260356	0	0	0	0	0.051	0	0.9	0.441	0.942
PF4	HRG	1847665	1843307	9606.ENSP00000296029	9606.ENSP00000232003	0	0	0	0	0	0	0.9	0.442	0.941
PF4	PROC	1847665	1843382	9606.ENSP00000296029	9606.ENSP00000234071	0	0	0	0	0	0.36	0.9	0.163	0.941
ITIH3	ITIH4	1861173	1845847	9606.ENSP00000415769	9606.ENSP00000266041	0	0	0	0.908	0.386	0	0.9	0.732	0.94
HSP90AA1	TUBA1A	1851814	1848244	9606.ENSP00000335153	9606.ENSP00000301071	0	0	0	0	0.057	0.324	0.9	0.17	0.94
ACTN1	ILK	1858193	1848060	9606.ENSP00000377941	9606.ENSP00000299421	0	0	0	0	0.056	0.118	0.9	0.358	0.939
MYL6	TPM4	1862334	1852912	9606.ENSP00000446714	9606.ENSP00000345230	0	0	0	0	0.12	0.17	0.9	0.231	0.936
AHSG	ITIH4	1859755	1845847	9606.ENSP00000393887	9606.ENSP00000266041	0	0	0	0	0.207	0	0.9	0.216	0.932
ITIH4	HRG	1845847	1843307	9606.ENSP00000266041	9606.ENSP00000232003	0	0	0	0	0.155	0	0.9	0.25	0.931
FLNA	VWF	1855120	1844904	9606.ENSP00000358866	9606.ENSP00000261405	0	0	0	0	0	0	0.9	0.341	0.931
VWF	HRG	1844904	1843307	9606.ENSP00000261405	9606.ENSP00000232003	0	0	0	0	0	0	0.9	0.324	0.929
HSP90AA1	ILK	1851814	1848060	9606.ENSP00000335153	9606.ENSP00000299421	0	0	0	0	0	0.123	0.9	0.26	0.929
C1R	CRP	1847243	1844348	9606.ENSP00000290575	9606.ENSP00000255030	0	0	0	0	0.054	0	0.9	0.304	0.928
VWF	PROC	1844904	1843382	9606.ENSP00000261405	9606.ENSP00000234071	0	0	0	0	0	0	0.9	0.304	0.927
SERPINA5	VWF	1851559	1844904	9606.ENSP00000333203	9606.ENSP00000261405	0	0	0	0	0	0	0.9	0.291	0.926
HSP90AA1	HSP90B1	1851814	1848102	9606.ENSP00000335153	9606.ENSP00000299767	0	0	0.527	0.833	0.378	0.295	0.8	0.861	0.925
ITIH3	HRG	1861173	1843307	9606.ENSP00000415769	9606.ENSP00000232003	0	0	0	0	0.165	0	0.9	0.173	0.925
TLN1	VWF	1849837	1844904	9606.ENSP00000316029	9606.ENSP00000261405	0	0	0	0	0	0	0.9	0.279	0.924
APOA4	APOA5	1853595	1843123	9606.ENSP00000350425	9606.ENSP00000227665	0	0	0	0.711	0.055	0	0.9	0.729	0.921
PPBP	THBS1	1847664	1844779	9606.ENSP00000296028	9606.ENSP00000260356	0	0	0	0	0	0	0.9	0.249	0.921
PPBP	HRG	1847664	1843307	9606.ENSP00000296028	9606.ENSP00000232003	0	0	0	0	0	0	0.9	0.215	0.918
C4A	C1QC	1859957	1856155	9606.ENSP00000396688	9606.ENSP00000363768	0	0	0	0	0.058	0	0.9	0.204	0.918
ITIH4	VWF	1845847	1844904	9606.ENSP00000266041	9606.ENSP00000261405	0	0	0	0	0	0	0.9	0.211	0.917
HSP90AA1	TUBA4A	1851814	1843912	9606.ENSP00000335153	9606.ENSP00000248437	0	0	0	0	0.057	0	0.9	0.179	0.915
SAA1	PF4	1853372	1847665	9606.ENSP00000348918	9606.ENSP00000296029	0	0	0	0	0	0	0.9	0.176	0.914
PF4	ITIH4	1847665	1845847	9606.ENSP00000296029	9606.ENSP00000266041	0	0	0	0	0	0	0.9	0.184	0.914
TPM4	TLN1	1852912	1849837	9606.ENSP00000345230	9606.ENSP00000316029	0	0	0	0	0.049	0	0.9	0.159	0.913
PPBP	ITIH4	1847664	1845847	9606.ENSP00000296028	9606.ENSP00000266041	0	0	0	0	0	0	0.9	0.169	0.913
SAA1	PPBP	1853372	1847664	9606.ENSP00000348918	9606.ENSP00000296028	0	0	0	0	0	0	0.9	0.16	0.912
AHSG	VWF	1859755	1844904	9606.ENSP00000393887	9606.ENSP00000261405	0	0	0	0	0	0	0.9	0.164	0.912
AHSG	THBS1	1859755	1844779	9606.ENSP00000393887	9606.ENSP00000260356	0	0	0	0	0	0	0.9	0.14	0.91
ACTN1	THBS1	1858193	1844779	9606.ENSP00000377941	9606.ENSP00000260356	0	0	0	0	0	0	0.9	0.133	0.909
AHSG	PPBP	1859755	1847664	9606.ENSP00000393887	9606.ENSP00000296028	0	0	0	0	0	0	0.9	0.126	0.908
ACTN1	VWF	1858193	1844904	9606.ENSP00000377941	9606.ENSP00000261405	0	0	0	0	0.053	0	0.9	0.09	0.906
ACTN1	ITIH4	1858193	1845847	9606.ENSP00000377941	9606.ENSP00000266041	0	0	0	0	0.061	0	0.9	0.079	0.905
C1QC	CRP	1856155	1844348	9606.ENSP00000363768	9606.ENSP00000255030	0	0	0	0	0	0	0.9	0.082	0.904
ACTN1	PF4	1858193	1847665	9606.ENSP00000377941	9606.ENSP00000296029	0	0	0	0	0	0	0.9	0.081	0.904
AHSG	PF4	1859755	1847665	9606.ENSP00000393887	9606.ENSP00000296029	0	0	0	0	0	0	0.9	0.074	0.903
MYL6	TLN1	1862334	1849837	9606.ENSP00000446714	9606.ENSP00000316029	0	0	0	0	0	0	0.9	0.078	0.903
ACTN1	PPBP	1858193	1847664	9606.ENSP00000377941	9606.ENSP00000296028	0	0	0	0	0	0	0.9	0.067	0.902
ITIH3	THBS1	1861173	1844779	9606.ENSP00000415769	9606.ENSP00000260356	0	0	0	0	0	0	0.9	0.064	0.902
ITIH3	ACTN1	1861173	1858193	9606.ENSP00000415769	9606.ENSP00000377941	0	0	0	0	0.061	0	0.9	0	0.902
ACTN1	HRG	1858193	1843307	9606.ENSP00000377941	9606.ENSP00000232003	0	0	0	0	0	0	0.9	0	0.9
ITIH3	PF4	1861173	1847665	9606.ENSP00000415769	9606.ENSP00000296029	0	0	0	0	0	0	0.9	0	0.9
AHSG	ACTN1	1859755	1858193	9606.ENSP00000393887	9606.ENSP00000377941	0	0	0	0	0	0	0.9	0	0.9
ITIH3	PPBP	1861173	1847664	9606.ENSP00000415769	9606.ENSP00000296028	0	0	0	0	0	0	0.9	0.045	0.9
ITIH3	VWF	1861173	1844904	9606.ENSP00000415769	9606.ENSP00000261405	0	0	0	0	0	0	0.9	0	0.9
AHSG	APOA2	1859755	1854701	9606.ENSP00000393887	9606.ENSP00000356969	0	0	0	0	0.86	0	0	0.241	0.889
HSP90AA1	HSPB1	1851814	1843915	9606.ENSP00000335153	9606.ENSP00000248553	0	0	0	0	0.052	0	0	0.874	0.876
TF	CP	1859071	1845575	9606.ENSP00000385834	9606.ENSP00000264613	0	0	0	0	0.227	0	0	0.826	0.859
RSU1	ILK	1852226	1848060	9606.ENSP00000339521	9606.ENSP00000299421	0	0	0	0	0.074	0.792	0	0.323	0.859
AHSG	APOC3	1859755	1843124	9606.ENSP00000393887	9606.ENSP00000227667	0	0	0	0	0.787	0	0	0.244	0.832
TPM4	MYH9	1852912	1842558	9606.ENSP00000345230	9606.ENSP00000216181	0	0	0	0	0.253	0.634	0	0.419	0.827
HIST3H3	HIST1H4A	1854433	1853925	9606.ENSP00000355657	9606.ENSP00000352980	0	0	0	0	0.202	0.506	0	0.572	0.816
AHSG	TF	1859755	1859071	9606.ENSP00000393887	9606.ENSP00000385834	0	0	0	0	0.683	0	0	0.44	0.814
ACTN1	TPM4	1858193	1852912	9606.ENSP00000377941	9606.ENSP00000345230	0	0	0	0	0.295	0.556	0	0.422	0.803
AHSG	ITIH2	1859755	1853681	9606.ENSP00000393887	9606.ENSP00000351190	0	0	0	0	0.779	0	0	0.127	0.799
APOC3	CETP	1843124	1842395	9606.ENSP00000227667	9606.ENSP00000200676	0	0	0	0	0	0	0	0.786	0.786
TF	APOA2	1859071	1854701	9606.ENSP00000385834	9606.ENSP00000356969	0	0	0	0	0.687	0	0	0.304	0.772
TF	IGFBP3	1859071	1857331	9606.ENSP00000385834	9606.ENSP00000370473	0	0	0	0	0.109	0.325	0	0.634	0.761
APOA2	ITIH2	1854701	1853681	9606.ENSP00000356969	9606.ENSP00000351190	0	0	0	0	0.739	0	0	0.117	0.759
VWF	CRP	1844904	1844348	9606.ENSP00000261405	9606.ENSP00000255030	0	0	0	0	0	0	0	0.743	0.743
TLN1	ILK	1849837	1848060	9606.ENSP00000316029	9606.ENSP00000299421	0	0	0	0	0.13	0.054	0	0.708	0.739
APOA2	CETP	1854701	1842395	9606.ENSP00000356969	9606.ENSP00000200676	0	0	0	0	0	0	0	0.739	0.739
AHSG	IGFBP1	1859755	1846447	9606.ENSP00000393887	9606.ENSP00000275525	0	0	0	0	0.696	0	0	0.152	0.732
SAA1	CRP	1853372	1844348	9606.ENSP00000348918	9606.ENSP00000255030	0	0	0	0	0.222	0	0	0.658	0.722
TF	CRP	1859071	1844348	9606.ENSP00000385834	9606.ENSP00000255030	0	0	0	0	0.055	0	0	0.715	0.719
PLTP	APOA2	1855678	1854701	9606.ENSP00000361508	9606.ENSP00000356969	0	0	0	0	0	0.36	0	0.574	0.715
SHBG	IGFBP1	1857224	1846447	9606.ENSP00000369816	9606.ENSP00000275525	0	0	0	0	0	0	0	0.706	0.706
FLNA	MYH9	1855120	1842558	9606.ENSP00000358866	9606.ENSP00000216181	0	0	0	0	0.073	0.544	0	0.355	0.704
HIST1H4A	HSP90AA1	1853925	1851814	9606.ENSP00000352980	9606.ENSP00000335153	0	0	0	0	0.058	0.045	0	0.694	0.7
C4A	C8A	1859957	1854122	9606.ENSP00000396688	9606.ENSP00000354458	0	0	0	0	0.148	0	0	0.658	0.696
ACTN1	MYH9	1858193	1842558	9606.ENSP00000377941	9606.ENSP00000216181	0	0	0	0	0.239	0.244	0	0.512	0.695
APOA2	PON1	1854701	1842913	9606.ENSP00000356969	9606.ENSP00000222381	0	0	0	0	0.225	0	0	0.622	0.695
SHBG	CRP	1857224	1844348	9606.ENSP00000369816	9606.ENSP00000255030	0	0	0	0	0.182	0	0	0.63	0.684
AHSG	ADIPOQ	1859755	1850277	9606.ENSP00000393887	9606.ENSP00000320709	0	0	0	0	0	0	0	0.681	0.681
HIST3H3	HSP90AA1	1854433	1851814	9606.ENSP00000355657	9606.ENSP00000335153	0	0	0	0	0	0.362	0	0.511	0.675
APOA2	APOD	1854701	1852905	9606.ENSP00000356969	9606.ENSP00000345179	0	0	0	0	0	0.36	0	0.503	0.668
ADIPOQ	APOC3	1850277	1843124	9606.ENSP00000320709	9606.ENSP00000227667	0	0	0	0	0	0	0	0.664	0.664
SHBG	ADIPOQ	1857224	1850277	9606.ENSP00000369816	9606.ENSP00000320709	0	0	0	0	0	0	0	0.659	0.659
IGFBP3	SHBG	1857331	1857224	9606.ENSP00000370473	9606.ENSP00000369816	0	0	0	0	0	0	0	0.659	0.659
APOA5	CETP	1843123	1842395	9606.ENSP00000227665	9606.ENSP00000200676	0	0	0	0	0	0	0	0.658	0.658
TUBA4A	MYH9	1843912	1842558	9606.ENSP00000248437	9606.ENSP00000216181	0	0	0	0	0.043	0.507	0	0.33	0.657
TF	IGFBP1	1859071	1846447	9606.ENSP00000385834	9606.ENSP00000275525	0	0	0	0	0.231	0.325	0	0.364	0.641
CP	CRP	1845575	1844348	9606.ENSP00000264613	9606.ENSP00000255030	0	0	0	0	0.054	0	0	0.63	0.635
HSP90AA1	MYH9	1851814	1842558	9606.ENSP00000335153	9606.ENSP00000216181	0	0	0	0	0.047	0.553	0	0.211	0.635
AHSG	CRP	1859755	1844348	9606.ENSP00000393887	9606.ENSP00000255030	0	0	0	0	0.092	0	0	0.579	0.601
CRP	LBP	1844348	1842663	9606.ENSP00000255030	9606.ENSP00000217407	0	0	0	0	0.223	0	0	0.502	0.596
HIST3H3	TUBB	1854433	1852162	9606.ENSP00000355657	9606.ENSP00000339001	0	0	0	0	0.066	0.186	0	0.503	0.589
ITIH4	FETUB	1845847	1845671	9606.ENSP00000266041	9606.ENSP00000265029	0	0	0	0	0.501	0	0	0.201	0.584
APOA4	CETP	1853595	1842395	9606.ENSP00000350425	9606.ENSP00000200676	0	0	0	0	0.053	0	0	0.578	0.584
IGFBP3	MMP3	1857331	1848108	9606.ENSP00000370473	9606.ENSP00000299855	0	0	0	0	0.054	0.36	0	0.364	0.581
CRP	CETP	1844348	1842395	9606.ENSP00000255030	9606.ENSP00000200676	0	0	0	0	0.06	0	0	0.573	0.581
HSP90AA1	LUM	1851814	1845897	9606.ENSP00000335153	9606.ENSP00000266718	0	0	0	0	0	0.382	0	0.339	0.574
APOA2	IGFBP1	1854701	1846447	9606.ENSP00000356969	9606.ENSP00000275525	0	0	0	0	0.561	0	0	0.065	0.572
TF	HRG	1859071	1843307	9606.ENSP00000385834	9606.ENSP00000232003	0	0	0	0	0.425	0	0	0.278	0.567
ITIH2	APOC3	1853681	1843124	9606.ENSP00000351190	9606.ENSP00000227667	0	0	0	0	0.549	0	0	0.074	0.564
TF	APOC3	1859071	1843124	9606.ENSP00000385834	9606.ENSP00000227667	0	0	0	0	0.366	0	0	0.341	0.564
ADIPOQ	MMP3	1850277	1848108	9606.ENSP00000320709	9606.ENSP00000299855	0	0	0	0	0	0	0	0.56	0.56
TF	APOD	1859071	1852905	9606.ENSP00000385834	9606.ENSP00000345179	0	0	0	0	0	0	0	0.549	0.549
CFHR1	C9	1849694	1845353	9606.ENSP00000314299	9606.ENSP00000263408	0	0	0	0	0.49	0	0	0.15	0.547
PLTP	APOC3	1855678	1843124	9606.ENSP00000361508	9606.ENSP00000227667	0	0	0	0	0	0	0	0.539	0.539
HSP90AA1	CRP	1851814	1844348	9606.ENSP00000335153	9606.ENSP00000255030	0	0	0	0	0	0	0	0.537	0.537
CRP	APOC3	1844348	1843124	9606.ENSP00000255030	9606.ENSP00000227667	0	0	0	0	0.119	0	0	0.495	0.536
PON1	CETP	1842913	1842395	9606.ENSP00000222381	9606.ENSP00000200676	0	0	0	0	0	0	0	0.53	0.53
HIST3H3	TUBA1A	1854433	1848244	9606.ENSP00000355657	9606.ENSP00000301071	0	0	0	0	0.056	0.147	0	0.455	0.522
HIST3H3	TUBA4A	1854433	1843912	9606.ENSP00000355657	9606.ENSP00000248437	0	0	0	0	0.056	0.147	0	0.455	0.522
MMP3	PPBP	1848108	1847664	9606.ENSP00000299855	9606.ENSP00000296028	0	0	0	0	0	0	0	0.521	0.521
AHSG	CP	1859755	1845575	9606.ENSP00000393887	9606.ENSP00000264613	0	0	0	0	0.236	0	0	0.399	0.521
TF	IGFBP2	1859071	1843367	9606.ENSP00000385834	9606.ENSP00000233809	0	0	0	0	0.055	0.325	0	0.305	0.518
ITIH4	C9	1845847	1845353	9606.ENSP00000266041	9606.ENSP00000263408	0	0	0	0	0.433	0	0	0.179	0.515
TF	ITIH2	1859071	1853681	9606.ENSP00000385834	9606.ENSP00000351190	0	0	0	0	0.483	0	0	0.096	0.512
IGFBP1	APOC3	1846447	1843124	9606.ENSP00000275525	9606.ENSP00000227667	0	0	0	0	0.325	0	0	0.305	0.511
MMP3	CRP	1848108	1844348	9606.ENSP00000299855	9606.ENSP00000255030	0	0	0	0	0.052	0	0	0.505	0.51
C4A	APOA2	1859957	1854701	9606.ENSP00000396688	9606.ENSP00000356969	0	0	0	0	0.127	0.36	0	0.184	0.505
CP	PROC	1845575	1843382	9606.ENSP00000264613	9606.ENSP00000234071	0	0	0	0	0.199	0.36	0	0.1	0.499
CP	C9	1845575	1845353	9606.ENSP00000264613	9606.ENSP00000263408	0	0	0	0	0.417	0	0	0.169	0.495
FLNA	TPM4	1855120	1852912	9606.ENSP00000358866	9606.ENSP00000345230	0	0	0	0	0.074	0.351	0	0.224	0.493
ADIPOQ	IGFBP1	1850277	1846447	9606.ENSP00000320709	9606.ENSP00000275525	0	0	0	0	0	0	0	0.492	0.491
ITIH3	C9	1861173	1845353	9606.ENSP00000415769	9606.ENSP00000263408	0	0	0	0	0.374	0	0	0.219	0.491
CRP	PON1	1844348	1842913	9606.ENSP00000255030	9606.ENSP00000222381	0	0	0	0	0.056	0	0	0.48	0.488
ITIH3	APOC3	1861173	1843124	9606.ENSP00000415769	9606.ENSP00000227667	0	0	0	0	0.487	0	0	0	0.487
THBS1	HSPB1	1844779	1843915	9606.ENSP00000260356	9606.ENSP00000248553	0	0	0	0	0	0	0	0.484	0.484
RSU1	LUM	1852226	1845897	9606.ENSP00000339521	9606.ENSP00000266718	0	0	0.477	0	0.055	0	0	0	0.484
APOC3	PON1	1843124	1842913	9606.ENSP00000227667	9606.ENSP00000222381	0	0	0	0	0.202	0	0	0.373	0.478
THBS1	IGFBP2	1844779	1843367	9606.ENSP00000260356	9606.ENSP00000233809	0	0	0	0	0	0.36	0	0.21	0.473
HSPB1	TUBA4A	1843915	1843912	9606.ENSP00000248553	9606.ENSP00000248437	0	0	0	0	0	0.417	0	0.126	0.469
TLN1	MYH9	1849837	1842558	9606.ENSP00000316029	9606.ENSP00000216181	0	0	0	0	0.259	0	0	0.311	0.468
ITIH3	IGFBP1	1861173	1846447	9606.ENSP00000415769	9606.ENSP00000275525	0	0	0	0	0.464	0	0	0	0.465
ACTN1	TUBA1A	1858193	1848244	9606.ENSP00000377941	9606.ENSP00000301071	0	0	0	0	0.056	0.357	0	0.188	0.464
HSP90B1	HSPB1	1848102	1843915	9606.ENSP00000299767	9606.ENSP00000248553	0	0	0	0	0.052	0	0	0.456	0.463
C1QC	CD14	1856155	1848617	9606.ENSP00000363768	9606.ENSP00000304236	0	0	0	0	0.436	0	0	0.082	0.461
ITIH3	APOA2	1861173	1854701	9606.ENSP00000415769	9606.ENSP00000356969	0	0	0	0	0.457	0	0	0	0.457
AHSG	FETUB	1859755	1845671	9606.ENSP00000393887	9606.ENSP00000265029	0	0	0	0.678	0.319	0	0	0.63	0.454
IGFBP3	ADIPOQ	1857331	1850277	9606.ENSP00000370473	9606.ENSP00000320709	0	0	0	0	0	0	0	0.447	0.447
IGFBP1	CRP	1846447	1844348	9606.ENSP00000275525	9606.ENSP00000255030	0	0	0	0	0.053	0	0	0.441	0.447
ITIH1	FETUB	1846309	1845671	9606.ENSP00000273283	9606.ENSP00000265029	0	0	0	0	0.332	0	0	0.206	0.447
MMP3	THBS1	1848108	1844779	9606.ENSP00000299855	9606.ENSP00000260356	0	0	0	0	0	0	0	0.445	0.445
IGFBP3	CRP	1857331	1844348	9606.ENSP00000370473	9606.ENSP00000255030	0	0	0	0	0	0	0	0.443	0.443
APOD	CETP	1852905	1842395	9606.ENSP00000345179	9606.ENSP00000200676	0	0	0	0	0	0	0	0.443	0.443
APOA4	APOD	1853595	1852905	9606.ENSP00000350425	9606.ENSP00000345179	0	0	0	0	0	0	0	0.441	0.441
ITIH1	HRG	1846309	1843307	9606.ENSP00000273283	9606.ENSP00000232003	0	0	0	0	0.276	0	0	0.259	0.441
PLTP	APOA5	1855678	1843123	9606.ENSP00000361508	9606.ENSP00000227665	0	0	0	0	0	0	0	0.44	0.44
TF	SHBG	1859071	1857224	9606.ENSP00000385834	9606.ENSP00000369816	0	0	0	0	0	0	0	0.44	0.44
TF	VWF	1859071	1844904	9606.ENSP00000385834	9606.ENSP00000261405	0	0	0	0	0	0	0	0.44	0.44
MYL6	ACTN1	1862334	1858193	9606.ENSP00000446714	9606.ENSP00000377941	0	0	0	0	0.052	0.292	0	0.231	0.439
APOA2	HRG	1854701	1843307	9606.ENSP00000356969	9606.ENSP00000232003	0	0	0	0	0.221	0	0	0.305	0.436
APOA2	CP	1854701	1845575	9606.ENSP00000356969	9606.ENSP00000264613	0	0	0	0	0.218	0	0	0.304	0.432
MYL6	FLNA	1862334	1855120	9606.ENSP00000446714	9606.ENSP00000358866	0	0	0	0	0.053	0.292	0	0.22	0.431
CP	PON1	1845575	1842913	9606.ENSP00000264613	9606.ENSP00000222381	0	0	0	0	0.212	0	0	0.305	0.429
ADIPOQ	CETP	1850277	1842395	9606.ENSP00000320709	9606.ENSP00000200676	0	0	0	0	0	0	0	0.427	0.426
C8A	ITIH1	1854122	1846309	9606.ENSP00000354458	9606.ENSP00000273283	0	0	0	0	0.35	0	0	0.152	0.426
FLNA	TLN1	1855120	1849837	9606.ENSP00000358866	9606.ENSP00000316029	0	0	0	0	0.059	0.075	0	0.392	0.425
APOD	APOC3	1852905	1843124	9606.ENSP00000345179	9606.ENSP00000227667	0	0	0	0	0	0	0	0.424	0.424
TF	ITIH4	1859071	1845847	9606.ENSP00000385834	9606.ENSP00000266041	0	0	0	0	0.122	0	0	0.364	0.418
ITIH1	ITIH4	1846309	1845847	9606.ENSP00000273283	9606.ENSP00000266041	0	0	0	0.846	0.336	0	0	0.782	0.416
HIST1H4A	TUBB	1853925	1852162	9606.ENSP00000352980	9606.ENSP00000339001	0	0	0	0	0.063	0.147	0	0.323	0.411
ITIH2	FETUB	1853681	1845671	9606.ENSP00000351190	9606.ENSP00000265029	0	0	0	0	0.338	0	0	0.146	0.411
ITIH1	C9	1846309	1845353	9606.ENSP00000273283	9606.ENSP00000263408	0	0	0	0	0.288	0	0	0.203	0.409
LUM	PON1	1845897	1842913	9606.ENSP00000266718	9606.ENSP00000222381	0	0	0	0	0	0	0	0.409	0.409
TF	FETUB	1859071	1845671	9606.ENSP00000385834	9606.ENSP00000265029	0	0	0	0	0.337	0	0	0.14	0.406
ITIH2	ITIH4	1853681	1845847	9606.ENSP00000351190	9606.ENSP00000266041	0	0	0	0.843	0.331	0	0	0.722	0.406
CP	APOC3	1845575	1843124	9606.ENSP00000264613	9606.ENSP00000227667	0	0	0	0	0.227	0	0	0.26	0.404
TF	SERPINA5	1859071	1851559	9606.ENSP00000385834	9606.ENSP00000333203	0	0	0	0	0.178	0	0	0.304	0.404

## Sheet: Table 2 
#node1	node2	homology	coexpression	experimentally_determined_interaction	database_annotated	automated_textmining	combined_score
TUBB	TUBA4A	0.92	0.739	0.924	0.9	0.83	0.997
TUBB	TUBA1A	0.92	0.739	0.924	0.9	0.752	0.997
APOA2	APOC3	0	0.737	0	0.9	0.822	0.994
MYL6	MYH9	0	0.055	0.889	0.9	0.333	0.992
APOC3	APOA5	0	0.319	0	0.9	0.823	0.986
CD14	LBP	0	0.054	0.36	0.9	0.727	0.981
AHSG	HRG	0	0.377	0	0.9	0.7	0.979
APOA4	APOC3	0	0.146	0	0.9	0.758	0.977
TUBA1A	TUBA4A	0.989	0	0.774	0.9	0.349	0.976
PF4	PPBP	0.901	0.752	0	0.9	0.924	0.976
THBS1	HRG	0	0	0.36	0.9	0.608	0.972
VWF	THBS1	0	0	0	0.9	0.72	0.97
C1QC	C1R	0	0.124	0	0.9	0.691	0.97
PF4	VWF	0	0.053	0	0.9	0.7	0.969
ITIH3	AHSG	0	0.656	0	0.9	0.077	0.965
ACTN1	TLN1	0	0.113	0.075	0.9	0.632	0.965
APOA2	APOA4	0	0	0	0.9	0.627	0.961
TUBB	HSP90AA1	0	0.061	0.132	0.9	0.567	0.96
SERPINA5	PROC	0	0.053	0.446	0.9	0.31	0.96
C8A	C9	0.8	0.375	0.36	0.9	0.305	0.958
ADIPOQ	CRP	0	0	0	0	0.956	0.956
PPBP	VWF	0	0.053	0	0.9	0.534	0.952
APOA2	APOA5	0	0.216	0	0.9	0.425	0.951
C4A	C1R	0	0.072	0	0.9	0.482	0.947
ITIH4	THBS1	0	0	0	0.9	0.489	0.946
PF4	THBS1	0	0.051	0	0.9	0.441	0.942
PF4	HRG	0	0	0	0.9	0.442	0.941
PF4	PROC	0	0	0.36	0.9	0.163	0.941
ITIH3	ITIH4	0.908	0.386	0	0.9	0.732	0.94
HSP90AA1	TUBA1A	0	0.057	0.324	0.9	0.17	0.94
ACTN1	ILK	0	0.056	0.118	0.9	0.358	0.939
MYL6	TPM4	0	0.12	0.17	0.9	0.231	0.936
AHSG	ITIH4	0	0.207	0	0.9	0.216	0.932
ITIH4	HRG	0	0.155	0	0.9	0.25	0.931
FLNA	VWF	0	0	0	0.9	0.341	0.931
VWF	HRG	0	0	0	0.9	0.324	0.929
HSP90AA1	ILK	0	0	0.123	0.9	0.26	0.929
C1R	CRP	0	0.054	0	0.9	0.304	0.928
VWF	PROC	0	0	0	0.9	0.304	0.927
SERPINA5	VWF	0	0	0	0.9	0.291	0.926
HSP90AA1	HSP90B1	0.833	0.378	0.295	0.8	0.861	0.925
ITIH3	HRG	0	0.165	0	0.9	0.173	0.925
TLN1	VWF	0	0	0	0.9	0.279	0.924
APOA4	APOA5	0.711	0.055	0	0.9	0.729	0.921
PPBP	THBS1	0	0	0	0.9	0.249	0.921
PPBP	HRG	0	0	0	0.9	0.215	0.918
C4A	C1QC	0	0.058	0	0.9	0.204	0.918
ITIH4	VWF	0	0	0	0.9	0.211	0.917
HSP90AA1	TUBA4A	0	0.057	0	0.9	0.179	0.915
SAA1	PF4	0	0	0	0.9	0.176	0.914
PF4	ITIH4	0	0	0	0.9	0.184	0.914
TPM4	TLN1	0	0.049	0	0.9	0.159	0.913
PPBP	ITIH4	0	0	0	0.9	0.169	0.913
SAA1	PPBP	0	0	0	0.9	0.16	0.912
AHSG	VWF	0	0	0	0.9	0.164	0.912
AHSG	THBS1	0	0	0	0.9	0.14	0.91
ACTN1	THBS1	0	0	0	0.9	0.133	0.909
AHSG	PPBP	0	0	0	0.9	0.126	0.908
ACTN1	VWF	0	0.053	0	0.9	0.09	0.906
ACTN1	ITIH4	0	0.061	0	0.9	0.079	0.905
C1QC	CRP	0	0	0	0.9	0.082	0.904
ACTN1	PF4	0	0	0	0.9	0.081	0.904
AHSG	PF4	0	0	0	0.9	0.074	0.903
MYL6	TLN1	0	0	0	0.9	0.078	0.903
ACTN1	PPBP	0	0	0	0.9	0.067	0.902
ITIH3	THBS1	0	0	0	0.9	0.064	0.902
ITIH3	ACTN1	0	0.061	0	0.9	0	0.902
ACTN1	HRG	0	0	0	0.9	0	0.9
ITIH3	PF4	0	0	0	0.9	0	0.9
AHSG	ACTN1	0	0	0	0.9	0	0.9
ITIH3	PPBP	0	0	0	0.9	0.045	0.9
ITIH3	VWF	0	0	0	0.9	0	0.9
AHSG	APOA2	0	0.86	0	0	0.241	0.889
HSP90AA1	HSPB1	0	0.052	0	0	0.874	0.876
TF	CP	0	0.227	0	0	0.826	0.859
RSU1	ILK	0	0.074	0.792	0	0.323	0.859
AHSG	APOC3	0	0.787	0	0	0.244	0.832
TPM4	MYH9	0	0.253	0.634	0	0.419	0.827
HIST3H3	HIST1H4A	0	0.202	0.506	0	0.572	0.816
AHSG	TF	0	0.683	0	0	0.44	0.814
ACTN1	TPM4	0	0.295	0.556	0	0.422	0.803
AHSG	ITIH2	0	0.779	0	0	0.127	0.799
APOC3	CETP	0	0	0	0	0.786	0.786
TF	APOA2	0	0.687	0	0	0.304	0.772
TF	IGFBP3	0	0.109	0.325	0	0.634	0.761
APOA2	ITIH2	0	0.739	0	0	0.117	0.759
VWF	CRP	0	0	0	0	0.743	0.743
TLN1	ILK	0	0.13	0.054	0	0.708	0.739
APOA2	CETP	0	0	0	0	0.739	0.739
AHSG	IGFBP1	0	0.696	0	0	0.152	0.732
SAA1	CRP	0	0.222	0	0	0.658	0.722
TF	CRP	0	0.055	0	0	0.715	0.719
PLTP	APOA2	0	0	0.36	0	0.574	0.715
SHBG	IGFBP1	0	0	0	0	0.706	0.706
FLNA	MYH9	0	0.073	0.544	0	0.355	0.704
HIST1H4A	HSP90AA1	0	0.058	0.045	0	0.694	0.7
C4A	C8A	0	0.148	0	0	0.658	0.696
ACTN1	MYH9	0	0.239	0.244	0	0.512	0.695
APOA2	PON1	0	0.225	0	0	0.622	0.695
SHBG	CRP	0	0.182	0	0	0.63	0.684
AHSG	ADIPOQ	0	0	0	0	0.681	0.681
HIST3H3	HSP90AA1	0	0	0.362	0	0.511	0.675
APOA2	APOD	0	0	0.36	0	0.503	0.668
ADIPOQ	APOC3	0	0	0	0	0.664	0.664
SHBG	ADIPOQ	0	0	0	0	0.659	0.659
IGFBP3	SHBG	0	0	0	0	0.659	0.659
APOA5	CETP	0	0	0	0	0.658	0.658
TUBA4A	MYH9	0	0.043	0.507	0	0.33	0.657
TF	IGFBP1	0	0.231	0.325	0	0.364	0.641
CP	CRP	0	0.054	0	0	0.63	0.635
HSP90AA1	MYH9	0	0.047	0.553	0	0.211	0.635
AHSG	CRP	0	0.092	0	0	0.579	0.601
CRP	LBP	0	0.223	0	0	0.502	0.596
HIST3H3	TUBB	0	0.066	0.186	0	0.503	0.589
ITIH4	FETUB	0	0.501	0	0	0.201	0.584
APOA4	CETP	0	0.053	0	0	0.578	0.584
IGFBP3	MMP3	0	0.054	0.36	0	0.364	0.581
CRP	CETP	0	0.06	0	0	0.573	0.581
HSP90AA1	LUM	0	0	0.382	0	0.339	0.574
APOA2	IGFBP1	0	0.561	0	0	0.065	0.572
TF	HRG	0	0.425	0	0	0.278	0.567
ITIH2	APOC3	0	0.549	0	0	0.074	0.564
TF	APOC3	0	0.366	0	0	0.341	0.564
ADIPOQ	MMP3	0	0	0	0	0.56	0.56
TF	APOD	0	0	0	0	0.549	0.549
CFHR1	C9	0	0.49	0	0	0.15	0.547
PLTP	APOC3	0	0	0	0	0.539	0.539
HSP90AA1	CRP	0	0	0	0	0.537	0.537
CRP	APOC3	0	0.119	0	0	0.495	0.536
PON1	CETP	0	0	0	0	0.53	0.53
HIST3H3	TUBA1A	0	0.056	0.147	0	0.455	0.522
HIST3H3	TUBA4A	0	0.056	0.147	0	0.455	0.522
MMP3	PPBP	0	0	0	0	0.521	0.521
AHSG	CP	0	0.236	0	0	0.399	0.521
TF	IGFBP2	0	0.055	0.325	0	0.305	0.518
ITIH4	C9	0	0.433	0	0	0.179	0.515
TF	ITIH2	0	0.483	0	0	0.096	0.512
IGFBP1	APOC3	0	0.325	0	0	0.305	0.511
MMP3	CRP	0	0.052	0	0	0.505	0.51
C4A	APOA2	0	0.127	0.36	0	0.184	0.505
CP	PROC	0	0.199	0.36	0	0.1	0.499
CP	C9	0	0.417	0	0	0.169	0.495
FLNA	TPM4	0	0.074	0.351	0	0.224	0.493
ADIPOQ	IGFBP1	0	0	0	0	0.492	0.491
ITIH3	C9	0	0.374	0	0	0.219	0.491
CRP	PON1	0	0.056	0	0	0.48	0.488
ITIH3	APOC3	0	0.487	0	0	0	0.487
THBS1	HSPB1	0	0	0	0	0.484	0.484
RSU1	LUM	0	0.055	0	0	0	0.484
APOC3	PON1	0	0.202	0	0	0.373	0.478
THBS1	IGFBP2	0	0	0.36	0	0.21	0.473
HSPB1	TUBA4A	0	0	0.417	0	0.126	0.469
TLN1	MYH9	0	0.259	0	0	0.311	0.468
ITIH3	IGFBP1	0	0.464	0	0	0	0.465
ACTN1	TUBA1A	0	0.056	0.357	0	0.188	0.464
HSP90B1	HSPB1	0	0.052	0	0	0.456	0.463
C1QC	CD14	0	0.436	0	0	0.082	0.461
ITIH3	APOA2	0	0.457	0	0	0	0.457
AHSG	FETUB	0.678	0.319	0	0	0.63	0.454
IGFBP3	ADIPOQ	0	0	0	0	0.447	0.447
IGFBP1	CRP	0	0.053	0	0	0.441	0.447
ITIH1	FETUB	0	0.332	0	0	0.206	0.447
MMP3	THBS1	0	0	0	0	0.445	0.445
IGFBP3	CRP	0	0	0	0	0.443	0.443
APOD	CETP	0	0	0	0	0.443	0.443
APOA4	APOD	0	0	0	0	0.441	0.441
ITIH1	HRG	0	0.276	0	0	0.259	0.441
PLTP	APOA5	0	0	0	0	0.44	0.44
TF	SHBG	0	0	0	0	0.44	0.44
TF	VWF	0	0	0	0	0.44	0.44
MYL6	ACTN1	0	0.052	0.292	0	0.231	0.439
APOA2	HRG	0	0.221	0	0	0.305	0.436
APOA2	CP	0	0.218	0	0	0.304	0.432
MYL6	FLNA	0	0.053	0.292	0	0.22	0.431
CP	PON1	0	0.212	0	0	0.305	0.429
ADIPOQ	CETP	0	0	0	0	0.427	0.426
C8A	ITIH1	0	0.35	0	0	0.152	0.426
FLNA	TLN1	0	0.059	0.075	0	0.392	0.425
APOD	APOC3	0	0	0	0	0.424	0.424
TF	ITIH4	0	0.122	0	0	0.364	0.418
ITIH1	ITIH4	0.846	0.336	0	0	0.782	0.416
HIST1H4A	TUBB	0	0.063	0.147	0	0.323	0.411
ITIH2	FETUB	0	0.338	0	0	0.146	0.411
ITIH1	C9	0	0.288	0	0	0.203	0.409
LUM	PON1	0	0	0	0	0.409	0.409
TF	FETUB	0	0.337	0	0	0.14	0.406
ITIH2	ITIH4	0.843	0.331	0	0	0.722	0.406
CP	APOC3	0	0.227	0	0	0.26	0.404
TF	SERPINA5	0	0.178	0	0	0.304	0.404
